# Supplementary material for: Harungana madagascariensis (Hypericaceae) is a key phorophyte for native epiphytes and lianas during ecological restoration: case study on an oceanic island
Source: PeerJ. 2025 Dec 19;13:e20520. doi: 10.7717/peerj.20520 (PMC12721127; doi:10.7717/peerj.20520)
Supplement: Supplemental Information 2 — Each species is listed with its average annual growth rate and growth rate ratio compared to Harungana madagascariensis, which has also been included for comparison. [file peerj-13-20520-s002.xlsx]

## Sheet: Sheet1
Scientific name	Family	Average annual growth rate (cm)	Growth rate ratio
Calophyllum tacamahaca	Calophyllaceae	0.187	3.9
Diospyros tessellaria	Ebenaceae	0.075	9.8
Elaeodendron orientale	Celastraceae	0.104	7.1
Erythrospermum monticulum	Achariaceae	0.056	13.2
Eugenia kanakana	Myrtaceae	0.091	8.1
Eugenia pollicina	Myrtaceae	0.132	5.6
Gaertnera psychotrioides	Rubiaceae	0.117	6.3
Harungana madagascariensis	Hypericaceae	0.738	1
Labourdonnaisia glauca	Sapotaceae	0.176	4.2
Mimusops maxima	Sapotaceae	0.099	7.8
Protium obtisufolium	Burseraceae	0.128	5.8
Psiloxylon mauritianum	Myrtaceae	0.22	3.4
Securinega durissima	Phyllanthaceae	0.095	7.5
Syzygium glomeratum	Myrtaceae	0.129	5.7
Warneckea trinervis	Melastomataceae	0.071	10.4
