# Supplementary material for: Harungana madagascariensis (Hypericaceae) is a key phorophyte for native epiphytes and lianas during ecological restoration: case study on an oceanic island
Source: PeerJ. 2025 Dec 19;13:e20520. doi: 10.7717/peerj.20520 (PMC12721127; doi:10.7717/peerj.20520)
Supplement: Supplemental Information 3 [file peerj-13-20520-s003.xlsx]

## Sheet: Sheet1
Category	Family	Species	Number of individuals
Epiphyte	Aspleniaceae	Asplenium nidus var. nidus	14
Epiphyte	Dryopteridaceae	Rumohra adiantiformis	7
Epiphyte	Hymenophyllaceae	Hymenophyllaceae	8
Epiphyte	Nephrolepidaceae	Nephrolepis biserrata	121
Epiphyte	Nephrolepidaceae	Nephrolepis cordifolia	159
Epiphyte	orchidaceae	Aeranthes arachnitis	1
Epiphyte	orchidaceae	Angraecum baideri	92
Epiphyte	orchidaceae	Angraecum mauritianum	45
Epiphyte	orchidaceae	Angraecum pectinatum	523
Epiphyte	orchidaceae	Angraecum sp.	386
Epiphyte	orchidaceae	Bulbophyllum cf. incurvum	3
Epiphyte	orchidaceae	Bulbophyllum sp.	4
Epiphyte	orchidaceae	Hederorkis scandederis	1
Epiphyte	orchidaceae	Jumellea recta	2
Epiphyte	orchidaceae	Polystachia mauritiana s.l.	118
Epiphyte	Piperaceae	Peperomia portulacoides	1
Epiphyte	Polypodiaceae	Lepisorus spicata	141
Epiphyte	Polypodiaceae	Microsorum punctatum	287
Epiphyte	Polypodiaceae	Microsorum scolopendria	30
Epiphyte	Psilotaceae	Psilotum nudum	2
Epiphyte	Pteridaceae	Anthrophyum immersum	6
Epiphyte	Pteridaceae	Haplopteris sp.	3
Epiphyte	Selaginellaceae	Selaginella sp.	19
Liana	Connaraceae	Cnestis polyphylla	21
Liana	Piperaceae	Piper borbonense	226
Liana	Rhamnaceae	Scutia myrtina	1
Liana	Smilacaceae	Smilax anceps	1
Liana	Urticaceae	Urera acuminata	7
