# Supplementary material for: Harungana madagascariensis (Hypericaceae) is a key phorophyte for native epiphytes and lianas during ecological restoration: case study on an oceanic island
Source: PeerJ. 2025 Dec 19;13:e20520. doi: 10.7717/peerj.20520 (PMC12721127; doi:10.7717/peerj.20520)
Supplement: Supplemental Information 4 [file peerj-13-20520-s004.xlsx]

## Sheet: Sheet1
Species	Number of individuals
Angraecum pectinatum	523
Angraecum sp.	386
Microsorum punctatum	287
Piper borbonense	226
Nephrolepis cordifolia	159
Lepisorus spicata	141
Nephrolepis biserrata	121
Polystachia mauritiana s.l.	118
Angraecum baideri	92
Angraecum mauritianum	45
Microsorum scolopendria	30
Cnestis polyphylla	21
Selaginella sp.	19
Asplenium nidus var. nidus	14
Hymenophyllaceae	8
Rumohra adiantiformis	7
Urera acuminata	7
Anthrophyum immersum	6
Bulbophyllum sp.	4
Bulbophyllum cf. incurvum	3
Haplopteris sp.	3
Jumellea recta	2
Psilotum nudum	2
Aeranthes arachnitis	1
Hederorkis scandederis	1
Peperomia portulacoides	1
Scutia myrtina	1
Smilax anceps	1
