# Supplementary material for: Harungana madagascariensis (Hypericaceae) is a key phorophyte for native epiphytes and lianas during ecological restoration: case study on an oceanic island
Source: PeerJ. 2025 Dec 19;13:e20520. doi: 10.7717/peerj.20520 (PMC12721127; doi:10.7717/peerj.20520)
Supplement: Supplemental Information 5 [file peerj-13-20520-s005.xlsx]

## Sheet: Sheet1
Species	Number of individuals	Relative frequency (%)	Number of host	Frequency of occurrence (%)
Aeranthes arachnitis	1	0.0448632	1	0.456621
Angraecum baideri	92	4.12741	1	0.456621
Angraecum mauritianum	45	2.01884	9	4.10959
Angraecum pectinatum	523	23.4634	30	13.6986
Angraecum sp.	386	17.3172	59	26.9406
Anthrophyum immersum	6	0.269179	1	0.456621
Asplenium nidus var. nidus	14	0.628084	8	3.65297
Bulbophyllum cf. incurvum	3	0.13459	2	0.913242
Bulbophyllum sp.	4	0.179453	2	0.913242
Cnestis polyphylla	21	0.942127	17	7.76256
Haplopteris sp.	3	0.13459	1	0.456621
Hederorkis scandederis	1	0.0448632	1	0.456621
Hymenophyllaceae	8	0.358905	6	2.73973
Jumellea recta	2	0.0897263	2	0.913242
Lepisorus spicata	141	6.32571	40	18.2648
Microsorum punctatum	287	12.8757	62	28.3105
Nephrolepis biserrata	121	5.42844	7	3.19635
Nephrolepis cordifolia	159	7.13324	11	5.02283
Peperomia portulacoides	1	0.0448632	1	0.456621
Microsorum scolopendria	30	1.3459	20	9.13242
Piper borbonense	226	10.1391	27	12.3288
Polystachia mauritiana s.l.	118	5.29385	14	6.39269
Psilotum nudum	2	0.0897263	1	0.456621
Rumohra adiantiformis	7	0.314042	5	2.28311
Scutia myrtina	1	0.0448632	1	0.456621
Selaginella sp.	19	0.8524	10	4.56621
Smilax anceps	1	0.0448632	1	0.456621
Urera acuminata	7	0.314042	5	2.28311
