# Supplementary material for: Harungana madagascariensis (Hypericaceae) is a key phorophyte for native epiphytes and lianas during ecological restoration: case study on an oceanic island
Source: PeerJ. 2025 Dec 19;13:e20520. doi: 10.7717/peerj.20520 (PMC12721127; doi:10.7717/peerj.20520)
Supplement: Supplemental Information 6 [file peerj-13-20520-s006.xlsx]

## Sheet: Sheet1
Family	Number of individuals	Rel_frequemcy_ab (%)	Number of species	Rel_frequency_sp (%)
Aspleniaceae	14	0.628084	1	3.57143
Connaraceae	21	0.942127	1	3.57143
Dryopteridaceae	7	0.314042	1	3.57143
Hymenophyllaceae	8	0.358905	1	3.57143
Nephrolepidaceae	280	12.5617	2	7.14286
orchidaceae	1175	52.7142	10	35.7143
Piperaceae	227	10.1839	2	7.14286
Polypodiaceae	458	20.5473	3	10.7143
Psilotaceae	2	0.0897263	1	3.57143
Pteridaceae	9	0.403769	2	7.14286
Rhamnaceae	1	0.0448632	1	3.57143
Selaginellaceae	19	0.8524	1	3.57143
Smilacaceae	1	0.0448632	1	3.57143
Urticaceae	7	0.314042	1	3.57143
