# Supplementary material for: Harungana madagascariensis (Hypericaceae) is a key phorophyte for native epiphytes and lianas during ecological restoration: case study on an oceanic island
Source: PeerJ. 2025 Dec 19;13:e20520. doi: 10.7717/peerj.20520 (PMC12721127; doi:10.7717/peerj.20520)
Supplement: Supplemental Information 7 [file peerj-13-20520-s007.xlsx]

## Sheet: Sheet1
TreeID	TreeID	Site	gps_device_date_explo_year	gps_device_date_explo_month	gps_device_date_explo_day	gps_device_time_explo_hour	gps_device_time_explo_minute	gps_device_device	date_year	date_month	date_day	time_hour	time_minute	waypoint_id	tag	georef	latitude	longitude	y_proj	x_proj	taxon_group_label	species_label	host_height	host_dbh	host_dbh1	host_dbh2	host_dbh3	host_dbh_tot	host_first_branch	host_max_crown	host_min_crown	host_crown_area	bark	bark_label	host_num_branch	age_label	strata	ab_orchid	ab_pteri	ab_liana	ab_epiphyte_tot	div_orchid	div_pteri	div_liana	div_tot	photo_ext	Treatment	Dist_hama	Orientation_hama
2023103104439	2023103104439	Camizard	2023	10	3	9	42	65s	2023	10	3	10	44	39	119	65s-39	-20.3326	57.7238	7.75155e+06	575559	Seed plant	Warneckea trinenis	5.99	6.4				6.4	2.46	2.2	1.5	10.3673	1	smooth	5	mature	Under canopy	7	0	0	7	1	0	0	1		same DBH	3.7	110
2023103112039	2023103112039	Camizard	2023	10	3	9	42	65s	2023	10	3	11	20	39	120	65s-39	-20.3326	57.7238	7.75155e+06	575554	Seed plant	Eugenia kanakana	6.75	5.8				5.8	4.16	1.4	0.95	4.17832	6	scales	4	mature	Under canopy	0	0	0	0	0	0	0	0	505-509	same DBH	3	222
2023103115540	2023103115540	Camizard	2023	10	3	9	42	65s	2023	10	3	11	55	40	121	65s-40	-20.3326	57.7239	7.75154e+06	575561	Seed plant	Apodites dimidiata	5.81	7.3				7.3	2.91	1.8	1	5.65487	3	furrows	11	mature	Under canopy	0	0	0	0	0	0	0	0	510-514	same DBH	0.4	224
2023103121342	2023103121342	Camizard	2023	10	3	9	42	65s	2023	10	3	12	13	42	122	65s-42	-20.3327	57.7239	7.75154e+06	575567	Seed plant	Grangeria borbonica	2.84	4.5				4.5	1.7	3.3	1.9	19.6978	1	smooth	2	mature	Under canopy	1	0	0	1	1	0	0	1	515-520	same DBH	4.2	222
2023103123944	2023103123944	Camizard	2023	10	3	9	42	65s	2023	10	3	12	39	44	123	65s-44	-20.3328	57.724	7.75153e+06	575574	Seed plant	Mimusops maxima	7.95	13.6				13.6	3.92	2.5	2.3	18.0642	4	ridges	29	mature	Canopy	0	0	0	0	0	0	0	0	526-531	same DBH	6.2	58
202310313313	202310313313	Camizard	2023	10	3	9	42	65s	2023	10	3	13	31	3	125	65s-3	-20.3325	57.7239	7.75156e+06	575564	Seed plant	Casearia coriacea	6.49	8.5				8.5	5.64	0.9	0.7	1.9792	1	smooth	2	mature	Under canopy	1	0	0	1	1	0	0	1	540-542	same DBH	6.25	98
20231031383	20231031383	Camizard	2023	10	3	9	42	65s	2023	10	3	13	8	3	124	65s-3	-20.3325	57.7238	7.75156e+06	575559	Seed plant	labourdonnaisia glauca	8.3	10.2				10.2	5.22	3.1	2.4	23.3734	3	furrows	22	growing	Under canopy	0	1	0	1	0	1	0	1	532-536	same DBH	2.8	32
2023106103452	2023106103452	Camizard	2023	10	6	9	42	65s	2023	10	6	10	34	52	127	65s-52	-20.3325	57.7245	7.75155e+06	575629	Seed plant	Diospyros tessellaria	8.16	14.5				14.5	2.75	3.2	2.6	26.1381	6	scales	5	mature	Canopy	14	55	0	69	3	2	0	5	574-577	same DBH	3.5	0
2023106132319	2023106132319	Camizard	2023	10	6	9	42	65s	2023	10	6	13	23	19	128	65s-19	-20.3327	57.7251	7.75154e+06	575691	Seed plant	Grangeria borbonica	6.22	10.9				10.9	2.52	3	2.3	21.677	6	scales	8	mature	Canopy	0	4	0	4	0	1	0	1	659-661	same DBH	2.6	80
202310613853	202310613853	Camizard	2023	10	6	9	42	65s	2023	10	6	13	8	53	128	65s-53	-20.3326	57.7246	7.75155e+06	575639	Seed plant	Elaeodendrum orientalis	8.22	9.8				9.8	4.43	1.9	1.7	10.1473	1	smooth	6	mature	Undercanopy	0	0	0	0	0	0	0	0	652-658	same DBH	3.9	68
202310614113	202310614113	Camizard	2023	10	6	9	42	65s	2023	10	6	14	1	13	130	65s-13	-20.3322	57.7251	7.75159e+06	575686	Seed plant	Diospyros tessellaria	8.7	8.4				8.4	7	3.1	1.9	18.504	6	scales	4	mature	Canopy	0	0	0	0	0	0	0	0	674-676	same DBH	2.75	76
202310695350	202310695350	Camizard	2023	10	6	9	42	65s	2023	10	6	9	53	50	126	65s-50	-20.3325	57.7245	7.75156e+06	575623	Seed plant	Syzygium glomeratum	6.3	7				7	1.7	1.95	1.4	8.57655	1	smooth	3	mature	Understory	4	3	0	7	1	2	0	3	102546 -551	same DBH	3.5	222
2023111113552	2023111113552	Camizard	2023	10	6	9	42	65s	2023	11	1	11	35	52	131	65s-52	-20.3325	57.7245	7.75156e+06	575631	Seed plant	Securinega durissima	9.35	17.3				17.3	5.26	2.45	1.65	12.6999	1	smooth	2	mature	Canopy	0	0	0	0	0	0	0	0		same DBH	11.65	10
20231215102626	20231215102626	Camizard	2023	12	15	9	31	65s	2023	12	15	10	26	26	148	65s-26	NA	NA	NA	NA	Seed plant	Calophyllum tacamahaca	3.22	2.5				2.5	1.17	1.1	0.97	3.35208	2	lenticels	23	growing	Under canopy	0	0	0	0	0	0	0	0		same age	11.3	342
20231215103526	20231215103526	Camizard	2023	12	15	9	31	65s	2023	12	15	10	35	26	149	65s-26	-20.3321	57.7259	7.7516e+06	575770	Seed plant	Warneckea trinenis	1.97	1.1				1.1	0.3	1.7	1.55	8.2781	1	smooth	12	growing	Under canopy	0	0	0	0	0	0	0	0		same age	6.04	290
2023121511027	2023121511027	Camizard	2023	12	15	9	31	65s	2023	12	15	11	0	27	150	65s-27	-20.3316	57.7256	7.75166e+06	575744	Seed plant	Warneckea trinenis	1.98	1				1	0.39	1.75	1.58	8.6865	1	smooth	20	growing	Under canopy	0	0	0	0	0	0	0	0		same age	1.6	192
20231215112228	20231215112228	Camizard	2023	12	15	9	31	65s	2023	12	15	11	22	28	151	65s-28	-20.3315	57.7255	7.75166e+06	575735	Seed plant	Warneckea trinenis	2.9	1.5				1.5	0.75	1.15	1.05	3.79347	1	smooth	19	growing	Under canopy	0	0	0	0	0	0	0	0		same age	2.8	348
20231215121930	20231215121930	Camizard	2023	12	15	9	31	65s	2023	12	15	12	19	30	152	65s-30	-20.3314	57.7257	7.75168e+06	575754	Seed plant	Warneckea trinenis	2.95	1.9				1.9	0.17	1.37	1.37	5.89646	1	smooth	31	growing	Under canopy	0	0	0	0	0	0	0	0		same age	5.7	340
20231215123932	20231215123932	Camizard	2023	12	15	9	31	65s	2023	12	15	12	39	32	153	65s-32	-20.3314	57.7256	7.75168e+06	575741	Seed plant	Calophyllum tacamahaca	3.65	3.2				3.2	2.29	1.37	1.36	5.85342	2	lenticels	12	growing	Under canopy	0	0	0	0	0	0	0	0		same age	8.65	204
20231215125633	20231215125633	Camizard	2023	12	15	9	31	65s	2023	12	15	12	56	33	154	65s-33	-20.3314	57.7255	7.75168e+06	575735	Seed plant	Warneckea trinenis	1.75	1.1				1.1	0.37	1.24	0.82	3.19437	1	smooth	16	growing	Under canopy	0	0	0	0	0	0	0	0		same age	5.8	240
20231215131745	20231215131745	Camizard	2023	12	15	9	31	65s	2023	12	15	13	17	45	155	65s-45	-20.3313	57.7257	7.75169e+06	575750	Seed plant	Eugenia kanakana	2	0.9				0.9	0.75	1.01	0.5	1.5865	1	smooth	11	growing	Under canopy	0	0	0	0	0	0	0	0	494a3e03-f818-4f04-a42b-ae2cd35c03a0.jpg	same age	6.9	340
2023121593225	2023121593225	Camizard	2023	12	15	9	31	65s	2023	12	15	9	32	25	147	65s-25	-20.3319	57.7258	7.75162e+06	575766	Seed plant	Warneckea trinenis	1.96	1				1	0.46	1.25	0.91	3.57356	1	smooth	13	growing	Under canopy	0	0	0	0	0	0	0	0		same age	8.4	28
202312221019192	202312221019192	Camizard	2023	12	22	9	36	65s	2023	12	22	10	19	192	157	65s-192	NA	NA	NA	NA	Seed plant	Eugenia kanakana	2.59	1.7				1.7	0.16	0.64	0.5	1.00531	1	smooth	19	mature	Under canopy	0	0	0	0	0	0	0	0		same age	1.28	306
20231222103090	20231222103090	Camizard	2023	12	22	9	36	65s	2023	12	22	10	30	90	158	65s-90	-20.3318	57.7249	7.75164e+06	575666	Seed plant	Warneckea trinenis	1.52	0.7				0.7	0.9	0.62	0.46	0.895982	1	smooth	11	growing	Under canopy	0	0	0	0	0	0	0	0		same age	3.7	336
20231222105893	20231222105893	Camizard	2023	12	22	9	36	65s	2023	12	22	10	58	93	159	65s-93	-20.3318	57.7248	7.75163e+06	575661	Seed plant	Warneckea trinenis	2.08	0.7				0.7	0.13	0.75	0.64	1.50796	1	smooth	15	growing	Undercanopy	0	0	0	0	0	0	0	0		same age	0.7	270
202312221110194	202312221110194	Camizard	2023	12	22	9	36	65s	2023	12	22	11	10	194	160	65s-194	-20.3326	57.7244	7.75154e+06	575621	Seed plant	Gaertnera psychotrioides	2.9	2.86				2.86	0.52	0.92	0.61	1.76306	1	smooth	15	growing	Undercanopy	0	0	0	0	0	0	0	0		same age	2.87	134
202312221122100	202312221122100	Camizard	2023	12	22	9	36	65s	2023	12	22	11	22	100	1	65s-100	-20.332	57.7247	7.75162e+06	575645	Seed plant	Protium obtisufolium	1.69	1.58				1.58	1.51	0.74	0.67	1.5576	1	smooth	0	growing	Undercanopy	0	0	0	0	0	0	0	0		same age	2.61	319
20231222121413	20231222121413	Camizard	2023	12	22	9	36	65s	2023	12	22	12	14	13	163	65s-13	-20.3322	57.725	7.75159e+06	575683	Seed plant	Gaertnera psychotrioides	2.17	1.4				1.4	1.25	0.71	0.64	1.42754	1	smooth	10	growing	Undercanopy	0	0	0	0	0	0	0	0		same age	1.53	337
20231222122114	20231222122114	Camizard	2023	12	22	9	36	65s	2023	12	22	12	21	14	164	65s-14	-20.3323	57.7249	7.75157e+06	575675	Seed plant	Warneckea trinenis	2.03	1.125				1.125	0.25	1.07	0.81	2.72282	1	smooth	18	growing	Undercanopy	0	0	0	0	0	0	0	0		same age	3.6	26
20231222122515	20231222122515	Camizard	2023	12	22	9	36	65s	2023	12	22	12	25	15	165	65s-15	-20.3323	57.725	7.75158e+06	575683	Seed plant	Labourdonnaisia glauca	2.17	2.15	1.18			3.33	1.16	0.84	0.57	1.50419	1	smooth	6	growing	Undercanopy	0	0	0	0	0	0	0	0		same age	2.94	180
20231222123315	20231222123315	Camizard	2023	12	22	9	36	65s	2023	12	22	12	33	15	166	65s-15	NA	NA	NA	NA	Seed plant	Calophyllum tacamahaca	1.67	1.14				1.14	1.36	0.52	0.49	0.800478	1	smooth	3	growing	Undercanopy	0	0	0	0	0	0	0	0		same age	NA	NA
20231222124316	20231222124316	Camizard	2023	12	22	9	36	65s	2023	12	22	12	43	16	167	65s-16	-20.3325	57.7249	7.75156e+06	575670	Seed plant	Eugenia kanakana	2.53	1.36				1.36	2.02	0.63	0.52	1.02919	1	smooth	3	growing	Undercanopy	0	0	0	0	0	0	0	0		same age	6.14	262
20231222124917	20231222124917	Camizard	2023	12	22	9	36	65s	2023	12	22	12	49	17	168	65s-17	-20.3325	57.7249	7.75155e+06	575674	Seed plant	Eugenia kanakana	1.29	1.19				1.19	1.1	0.61	0.47	0.900695	1	smooth	4	growing	Undercanopy	0	0	0	0	0	0	0	0		same age	3.58	274
2023122212512	2023122212512	Camizard	2023	12	22	9	36	65s	2023	12	22	12	5	12	162	65s-12	-20.3321	57.7249	7.7516e+06	575674	Seed plant	Eugenia kanakana	2.02	1.055				1.055	1.49	0.71	0.48	1.07065	1	smooth	4	growing	Undercanopy	0	0	0	0	0	0	0	0		same age	6.86	86
20231222125518	20231222125518	Camizard	2023	12	22	9	36	65s	2023	12	22	12	55	18	169	65s-18	-20.3326	57.725	7.75155e+06	575685	Seed plant	Labourdonnaisia glauca	3.05	3.48				3.48	0.23	1.25	0.63	2.474	1	smooth	6	growing	Undercanopy	0	0	0	0	0	0	0	0		same age	3.01	274
20231222131520	20231222131520	Camizard	2023	12	22	9	36	65s	2023	12	22	13	15	20	171	65s-20	-20.3328	57.725	7.75152e+06	575681	Seed plant	Eugenia kanakana	2.13	1.16				1.16	1.31	0.65	0.14	0.285885	1	smooth	2	growing	Undercanopy	0	0	0	0	0	0	0	0		same age	2.93	110
20231222132421	20231222132421	Camizard	2023	12	22	9	36	65s	2023	12	22	13	24	21	172	65s-21	-20.333	57.7251	7.75151e+06	575686	Seed plant	Eugenia kanakana	1.83	0.81				0.81	0.55	0.52	0.28	0.457416	1	smooth	11	growing	Undercanopy	0	0	0	0	0	0	0	0		same age	2.2	46
20231222133522	20231222133522	Camizard	2023	12	22	9	36	65s	2023	12	22	13	35	22	172	65s-22	-20.3327	57.7248	7.75153e+06	575658	Seed plant	Eugenia kanakana	2.02	1.5				1.5	1.01	0.73	0.63	1.44482	1	smooth	6	growing	Undercanopy	0	0	0	0	0	0	0	0		same age	2.66	252
20231222134554	20231222134554	Camizard	2023	12	22	9	36	65s	2023	12	22	13	45	54	174	65s-54	-20.3328	57.7248	7.75152e+06	575654	Seed plant	Eugenia kanakana	2.15	1.11				1.11	0.6	0.73	0.56	1.28428	1	smooth	13	growing	Undercanopy	0	0	0	0	0	0	0	0		same age	3.01	117
20231222135423	20231222135423	Camizard	2023	12	22	9	36	65s	2023	12	22	13	54	23	175	65s-23	-20.3327	57.7247	7.75154e+06	575647	Seed plant	Labourdonnaisia glauca	5	2.7	1.19			3.89	0.86	151	0.65	308.347	1	smooth	3	growing	Undercanopy	0	0	0	0	0	0	0	0		same age	1.68	10
2023122213719	2023122213719	Camizard	2023	12	22	9	36	65s	2023	12	22	13	7	19	170	65s-19	-20.3327	57.7251	7.75154e+06	575690	Seed plant	Warneckea trinenis	1.8	1.23				1.23	0.01	0.3	0.22	0.207345	1	smooth	5	growing	Undercanopy	0	0	0	0	0	0	0	0		same age	1.21	126
20231222937191	20231222937191	Camizard	2023	12	22	9	36	65s	2023	12	22	9	37	191	156	65s-191	NA	NA	NA	NA	Seed plant	Warneckea trinenis	1.78	1.15				1.15	1.14	0.59	0.37	0.68581	1	smooth	8	growing	Under canopy	4	0	0	4	2	0	0	2		same age	0.78	169
2023811102315	2023811102315	Camizard	2023	8	11	9	20	65s	2023	8	11	10	23	15	58	65s-15	-20.3323	57.725	7.75158e+06	575683	Seed plant	Harungana madagascariensis	9.06	4.7				4.7	4.85	3	1.9	17.9071	3	furrows	3	senescent	Canopy	0	0	0	0	0	0	0	0		Hama
2023811103115	2023811103115	Camizard	2023	8	11	9	20	65s	2023	8	11	10	31	15	60	65s-15	-20.3323	57.725	7.75158e+06	575683	Seed plant	Harungana madagascariensis	10	10.5				10.5	3.9	7.3	1.6	36.6938	3	furrows	6	senescent	Canopy	0	0	0	0	0	0	0	0		Hama
2023811104016	2023811104016	Camizard	2023	8	11	9	20	65s	2023	8	11	10	40	16	61	65s-16	-20.3325	57.725	7.75156e+06	575676	Seed plant	Harungana madagascariensis	11.2	16.3				16.3	7.25	5.5	4.2	72.5708	3	furrows	5	mature	Canopy	0	0	0	0	0	0	0	0		Hama
2023811104717	2023811104717	Camizard	2023	8	11	9	20	65s	2023	8	11	10	47	17	62	65s-17	-20.3325	57.725	7.75155e+06	575678	Seed plant	Harungana madagascariensis	9.48	8.9				8.9	5.29	2.6	2	16.3363	3	furrows	4	senescent	Canopy	0	0	0	0	0	0	0	0		Hama
2023811105418	2023811105418	Camizard	2023	8	11	9	20	65s	2023	8	11	10	54	18	63	65s-18	-20.3326	57.7251	7.75155e+06	575688	Seed plant	Harungana madagascariensis	10.55	14.8				14.8	2	9.3	4.9	143.162	3	furrows	7	senescent	Canopy	73	0	0	73	1	0	0	1		Hama
2023811134719	2023811134719	Camizard	2023	8	11	9	20	65s	2023	8	11	13	47	19	64	65s-19	-20.3327	57.7251	7.75154e+06	575689	Seed plant	Harungana madagascariensis	7.23	10.9				10.9	4.3	3.4	2.7	28.8398	3	furrows	8	senescent	Canopy	0	0	0	0	0	0	0	0		Hama
2023811135420	2023811135420	Camizard	2023	8	11	9	20	65s	2023	8	11	13	54	20	65	65s-20	-20.3328	57.725	7.75152e+06	575678	Seed plant	Harungana madagascariensis	5.5	9.3				9.3	2.25	3.5	3	32.9867	3	furrows	7	senescent	Canopy	0	0	0	0	0	0	0	0		Hama
2023811135921	2023811135921	Camizard	2023	8	11	9	20	65s	2023	8	11	13	59	21	66	65s-21	-20.333	57.725	7.75151e+06	575685	Seed plant	Harungana madagascariensis	5.7	5.2				5.2	3.65	2	1.8	11.3097	3	furrows	4	senescent	Canopy	0	0	0	0	0	0	0	0		Hama
2023811141423	2023811141423	Camizard	2023	8	11	9	20	65s	2023	8	11	14	14	23	68	65s-23	-20.3327	57.7247	7.75153e+06	575647	Seed plant	Harungana madagascariensis	8.64	10.2				10.2	4.45	4.9	3.3	50.7996	3	furrows	9	senescent	Canopy	1	1	0	2	1	1	0	2		Hama
2023811143124	2023811143124	Camizard	2023	8	11	9	20	65s	2023	8	11	14	31	24	69	65s-24	-20.3393	57.6977	7.75081e+06	572826	Seed plant	Harungana madagascariensis	12.1	16.5				16.5	6.01	5	3.9	61.2611	3	furrows	6	senescent	Canopy	0	6	0	6	0	1	0	1		Hama
202381114722	202381114722	Camizard	2023	8	11	9	20	65s	2023	8	11	14	7	22	67	65s-22	-20.3327	57.7248	7.75153e+06	575661	Seed plant	Harungana madagascariensis	8	10.4				10.4	5	3.8	3.4	40.5894	3	furrows	6	mature	Canopy	0	0	0	0	0	0	0	0		Hama
202381192112	202381192112	Camizard	2023	8	11	9	20	65s	2023	8	11	9	21	12	55	65s-12	-20.3321	57.7249	7.7516e+06	575667	Seed plant	Harungana madagascariensis	10.47	8				8	3.26	2.9	1.6	14.577	3	furrows	5	senescent	Canopy	0	0	0	0	0	0	0	0		Hama
202381194013	202381194013	Camizard	2023	8	11	9	20	65s	2023	8	11	9	40	13	56	65s-13	-20.3322	57.725	7.75159e+06	575684	Seed plant	Harungana madagascariensis	8.62	8.2				8.2	4.93	3.2	1.8	18.0956	3	furrows	2	senescent	Canopy	1	0	0	1	1	0	0	1		Hama
202381195814	202381195814	Camizard	2023	8	11	9	20	65s	2023	8	11	9	58	14	57	65s-14	-20.3324	57.7249	7.75157e+06	575674	Seed plant	Harungana madagascariensis	7.39	10				10	3.46	4.7	3.5	51.6792	3	furrows	4	mature	Canopy	3	0	0	3	1	0	0	1		Hama
202381410228	202381410228	Camizard	2023	8	14	8	59	65s	2023	8	14	10	2	28	10	65s-28	-20.3316	57.7255	7.75166e+06	575737	Seed plant	Harungana madagascariensis	9	13.6				13.6	5.5	6.7	3.5	73.6703	3	furrows	5	senescent	Canopy	0	0	0	0	0	0	0	0		Hama
2023814102630	2023814102630	Camizard	2023	8	14	8	59	65s	2023	8	14	10	26	30	70	65s-30	-20.3314	57.7257	7.75167e+06	575757	Seed plant	Harungana madagascariensis	6	11.1	10.3			21.4	5	6	5.8	109.327	3	furrows	4	senescent	Canopy	12	0	0	12	2	0	0	2		Hama
2023814113532	2023814113532	Camizard	2023	8	14	8	59	65s	2023	8	14	11	35	32	71	65s-32	-20.3314	57.7256	7.75168e+06	575743	Seed plant	Harungana madagascariensis	9	13.4				13.4	3.35	6.4	5.6	112.595	3	furrows	3	senescent	Canopy	5	0	0	5	1	0	0	1		Hama
2023814121533	2023814121533	Camizard	2023	8	14	8	59	65s	2023	8	14	12	15	33	72	65s-33	-20.3314	57.7256	7.75168e+06	575741	Seed plant	Harungana madagascariensis	9	12.9				12.9	7	3.7	2.3	26.735	3	furrows	2	senescent	Canopy	4	0	0	4	1	0	0	1		Hama
2023814132434	2023814132434	Camizard	2023	8	14	8	59	65s	2023	8	14	13	24	34	73	65s-34	-20.3324	57.7242	7.75157e+06	575593	Seed plant	Harungana madagascariensis	7	18.5				18.5	2.4	7.8	7.6	186.234	3	furrows	5	senescent	Canopy	0	4	0	4	0	2	0	2		Hama
202381414353	202381414353	Camizard	2023	8	14	8	59	65s	2023	8	14	14	35	3	74	65s-3	-20.3325	57.7238	7.75156e+06	575557	Seed plant	Harungana madagascariensis	9.24	8.3				8.3	6.1	3.2	2.2	22.1168	3	furrows	2	mature	Canopy	0	0	0	0	0	0	0	0		Hama
2023814145035	2023814145035	Camizard	2023	8	14	8	59	65s	2023	8	14	14	50	35	75	65s-35	-20.3327	57.7237	7.75154e+06	575545	Seed plant	Harungana madagascariensis	9	12.3				12.3	7	4.3	4	54.0354	3	furrows	5	mature	Canopy	5	6	0	11	1	1	0	2		Hama
20238141463	20238141463	Camizard	2023	8	14	8	59	65s	2023	8	14	14	6	3	44	65s-3	-20.3325	57.7238	7.75156e+06	575557	Seed plant	Harungana madagascariensis	8.5	11.1				11.1	6	2.5	1.8	14.1372	3	furrows	3	senescent	Canopy	0	6	0	6	0	2	0	2		Hama
20238149025	20238149025	Camizard	2023	8	14	8	59	65s	2023	8	14	9	0	25	1	65s-25	-20.332	57.7258	7.75162e+06	575764	Seed plant	Harungana madagascariensis	7.15	11.1				11.1	3.2	3.4	2.5	26.7035	3	furrows	7	senescent	Canopy	0	0	0	0	0	0	0	0		Hama
202381491726	202381491726	Camizard	2023	8	14	8	59	65s	2023	8	14	9	17	26	59	65s-26	-20.3321	57.7259	7.7516e+06	575776	Seed plant	Harungana madagascariensis	7.5	9.9				9.9	5.9	3.2	4	40.2124	3	furrows	4	senescent	Canopy	0	1	0	1	0	1	0	1		Hama
202381495327	202381495327	Camizard	2023	8	14	8	59	65s	2023	8	14	9	53	27	11	65s-27	-20.3315	57.7256	7.75166e+06	575744	Seed plant	Harungana madagascariensis	10	10				10	8	4.6	2.7	39.0186	3	furrows	4	senescent	Canopy	0	0	0	0	0	0	0	0		Hama
2023815112536	2023815112536	Camizard	2023	8	15	9	23	65s	2023	8	15	11	25	36	76	65s-36	-20.3326	57.7236	7.75155e+06	575536	Seed plant	Harungana madagascariensis	7.5	8.5				8.5	6	2.7	2.6	22.054	3	furrows	3	mature	Canopy	16	6	0	22	1	2	0	3		Hama
2023815125637	2023815125637	Camizard	2023	8	15	9	23	65s	2023	8	15	12	56	37	77	65s-37	-20.3326	57.7237	7.75155e+06	575549	Seed plant	Harungana madagascariensis	6	6.7				6.7	5	3.22	2.3	23.2666	3	furrows	4	senescent	Canopy	0	1	0	1	0	1	0	1		Hama
2023815131038	2023815131038	Camizard	2023	8	15	9	23	65s	2023	8	15	13	10	38	78	65s-38	-20.3326	57.7237	7.75155e+06	575545	Seed plant	Harungana madagascariensis	7	9.5				9.5	4.5	3.8	2	23.8761	3	furrows	5	senescent	Canopy	2	3	0	5	1	1	0	2		Hama
2023815133338	2023815133338	Camizard	2023	8	15	9	23	65s	2023	8	15	13	33	38	79	65s-38	-20.3326	57.7237	7.75155e+06	575545	Seed plant	Harungana madagascariensis	7	12.1				12.1	2.8	4.1	3.7	47.658	3	furrows	7	senescent	Canopy	2	19	0	21	1	3	0	4		Hama
2023815144439	2023815144439	Camizard	2023	8	15	9	23	65s	2023	8	15	14	44	39	81	65s-39	-20.3326	57.7238	7.75155e+06	575556	Seed plant	Harungana madagascariensis	8	5.6				5.6	7.5	1.6	1.5	7.53982	3	furrows	2	mature	Canopy	0	0	0	0	0	0	0	0		Hama
2023815145439	2023815145439	Camizard	2023	8	15	9	23	65s	2023	8	15	14	54	39	80	65s-39	-20.3326	57.7238	7.75155e+06	575556	Seed plant	Harungana madagascariensis	8	6.3				6.3	5	1.9	1.6	9.55044	3	furrows	7	senescent	Canopy	0	1	0	1	0	1	0	1		Hama
2023815151342	2023815151342	Camizard	2023	8	15	9	23	65s	2023	8	15	15	13	42	83	65s-42	-20.3326	57.724	7.75154e+06	575570	Seed plant	Harungana madagascariensis	7	4.4				4.4	4.2	2.5	2.5	19.635	3	furrows		mature	Canopy	0	0	0	0	0	0	0	0		Hama
2023815152944	2023815152944	Camizard	2023	8	15	9	23	65s	2023	8	15	15	29	44	45	65s-44	-20.3328	57.7239	7.75153e+06	575568	Seed plant	Harungana madagascariensis	8.69	14.1				14.1	6.28	7.2	4.5	101.788	3	furrows	5	senescent	Canopy	0	2	0	2	0	2	0	2		Hama
202381515340	202381515340	Camizard	2023	8	15	9	23	65s	2023	8	15	15	3	40	82	65s-40	-20.3326	57.7239	7.75154e+06	575561	Seed plant	Harungana madagascariensis	7.17	7.6				7.6	1.85	2.7	1.8	15.2681	3	furrows	4	senescent	Canopy	0	0	0	0	0	0	0	0		Hama
20238159258	20238159258	Camizard	2023	8	15	9	23	65s	2023	8	15	9	25	8	49	65s-8	-20.3324	57.7234	7.75157e+06	575514	Seed plant	Harungana madagascariensis	10.42	17.8				17.8	2.6	7.5	5	117.81	3	furrows	8	senescent	Canopy	2	24	0	26	2	1	0	3		Hama
2023816105848	2023816105848	Camizard	2023	8	16	9	21	65s	2023	8	16	10	58	48	87	65s-48	-20.3325	57.7243	7.75156e+06	575607	Seed plant	Harungana madagascariensis	8	14.3				14.3	4.3	5.3	3.2	53.2814	3	furrows	5	mature	Canopy	0	14	0	14	0	3	0	3		Hama
202381610847	202381610847	Camizard	2023	8	16	9	21	65s	2023	8	16	10	8	47	86	65s-47	-20.3324	57.7242	7.75157e+06	575593	Seed plant	Harungana madagascariensis	6	18.4				18.4	2.8	4.1	3.2	41.2177	3	furrows	4	senescent	Canopy	0	9	0	9	0	2	0	2		Hama
2023816123449	2023816123449	Camizard	2023	8	16	9	21	65s	2023	8	16	12	34	49	88	65s-49	-20.3325	57.7245	7.75156e+06	575623	Seed plant	Harungana madagascariensis	8	9.5				9.5	4.5	4.6	2.7	39.0186	3	furrows	4	senescent	Canopy	7	7	0	14	1	2	0	3		Hama
2023816133450	2023816133450	Camizard	2023	8	16	9	21	65s	2023	8	16	13	34	50	89	65s-50	-20.3325	57.7245	7.75156e+06	575625	Seed plant	Harungana madagascariensis	8	6.8				6.8	6	2.7	2.2	18.6611	3	furrows	2	mature	Canopy	0	0	0	0	0	0	0	0		Hama
2023816134552	2023816134552	Camizard	2023	8	16	9	21	65s	2023	8	16	13	45	52	90	65s-52	-20.3326	57.7245	7.75155e+06	575629	Seed plant	Harungana madagascariensis	8	11	6.5			17.5	6	4.3	2.8	37.8248	3	furrows	4	senescent	Canopy	7	0	0	7	1	0	0	1		Hama
202381614852	202381614852	Camizard	2023	8	16	9	21	65s	2023	8	16	14	8	52	91	65s-52	-20.3326	57.7245	7.75155e+06	575629	Seed plant	Harungana madagascariensis	7.5	14.6				14.6	4.1	4.1	2.6	33.4894	3	furrows	5	senescent	Canopy	18	4	0	22	2	2	0	4		Hama
2023816152753	2023816152753	Camizard	2023	8	16	9	21	65s	2023	8	16	15	27	53	92	65s-53	-20.3326	57.7246	7.75155e+06	575635	Seed plant	Harungana madagascariensis	9.37	9.8				9.8	5.93	4.4	2.6	35.9398	3	furrows	7	senescent	Canopy	0	0	0	0	0	0	0	0		Hama
2023816153954	2023816153954	Camizard	2023	8	16	9	21	65s	2023	8	16	15	39	54	93	65s-54	-20.3328	57.7247	7.75152e+06	575652	Seed plant	Harungana madagascariensis	6.8	9				9	3.99	3.5	2.9	31.8872	3	furrows	4	senescent	Canopy	0	0	0	0	0	0	0	0		Hama
202381692145	202381692145	Camizard	2023	8	16	9	21	65s	2023	8	16	9	21	45	84	65s-45	-20.3313	57.7257	7.75169e+06	575753	Seed plant	Harungana madagascariensis	10.86	9.5				9.5	5.14	4	2.5	31.4159	3	furrows	8	senescent	Canopy	0	0	0	0	0	0	0	0		Hama
202381694846	202381694846	Camizard	2023	8	16	9	21	65s	2023	8	16	9	48	46	85	65s-46	-20.3324	57.7243	7.75157e+06	575605	Seed plant	Harungana madagascariensis	8	9				9	5.5	2.3	2.3	16.619	3	furrows	4	senescent	Canopy	0	1	0	1	0	1	0	1		Hama
202388105269	202388105269	Camizard	2023	8	8	9	10	etrex	2023	8	8	10	52	69		etrex-69	-20.3317	57.7249	7.75165e+06	575671	Seed plant	Harungana madagascariensis	6	11.3				11.3	1.05	3.3	4.5	46.6527	3	furrows	6	senescent	Canopy	0	0	0	0	0	0	0	0		Hama
202388111192	202388111192	Camizard	2023	8	8	9	10	etrex	2023	8	8	11	1	192	52	etrex-192	NA	NA	NA	NA	Seed plant	Harungana madagascariensis	5.5	8	7.2			15.2	1.1	4.1	2.1	27.0491	3	furrows	6	senescent	Canopy	6	0	0	6	1	0	0	1		Hama
202388114490	202388114490	Camizard	2023	8	8	9	10	etrex	2023	8	8	11	44	90	53	etrex-90	-20.3318	57.7249	7.75164e+06	575668	Seed plant	Harungana madagascariensis	4	4.8				4.8	2.5	1.7	1.6	8.54513	3	furrows	6	senescent	Canopy	3	0	0	3	1	0	0	1		Hama
2023881237194	2023881237194	Camizard	2023	8	8	9	10	etrex	2023	8	8	12	37	194	33	etrex-194	-20.3326	57.7244	7.75154e+06	575620	Seed plant	Harungana madagascariensis	7	8.8	16.2			25	1.7	8.48	3.93	104.698	3	furrows	17	senescent	Canopy	0	4	0	4	0	2	0	2		Hama
20238812693	20238812693	Camizard	2023	8	8	9	10	etrex	2023	8	8	12	6	93	54	etrex-193	-20.3318	57.7248	7.75163e+06	575662	Seed plant	Harungana madagascariensis	6.01	7				7	1.6	2.5	1.5	11.781	3	furrows	7	mature	Canopy	0	0	0	0	0	0	0	0		Hama
2023881319100	2023881319100	Camizard	2023	8	8	9	10	etrex	2023	8	8	13	19	100	35	etrex-100	-20.332	57.7247	7.75162e+06	575648	Seed plant	Harungana madagascariensis	8	9.4				9.4	3.6	3.8	3.5	41.7832	3	furrows	5	senescent	Canopy	0	0	0	0	0	0	0	0		Hama
202388912191	202388912191	Camizard	2023	8	8	9	10	etrex	2023	8	8	9	12	191	51	etrex-191	NA	NA	NA	NA	Seed plant	Harungana madagascariensis	4	10.5				10.5	145	3.7	3.3	38.3588	3	furrows	8	senescent	Canopy	19	0	0	19	2	0	0	2		Hama
202391101527	202391101527	Camizard	2023	9	1	9	3	FB	2023	9	1	10	15	27	5	FB-27	-20.3316	57.7256	7.75166e+06	575748	Seed plant	Diospyros tessellaria	10.72	10.2				10.2	5.37	2.1	1.95	12.8648	6	scales		mature	Canopy	0	0	0	0	0	0	0	0		same DBH	6.66	140
202391103728	202391103728	Camizard	2023	9	1	9	3	FB	2023	9	1	10	37	28	6	FB-28	-20.3315	57.7255	7.75167e+06	575731	Seed plant	Grangeria borbonica	9.22	13.7				13.7	5.5	3.65	2.3	26.3737	1	smooth	3	mature	Canopy	2	0	0	2	1	0	0	1	101-0677-81	same DBH	5.46	314
20239111530	20239111530	Camizard	2023	9	1	9	3	FB	2023	9	1	11	5	30	7	FB-30	-20.3314	57.7258	7.75168e+06	575760	Seed plant	Securinega durissima	10.18	20.7				20.7	5.03	4.1	3.6	46.3699	7	strips	7	mature	Canopy	5	1	0	6	1	1	0	2	101-693-695	same DBH	8.94	20
202391124732	202391124732	Camizard	2023	9	1	9	3	FB	2023	9	1	12	47	32	8	FB-32	-20.3314	57.7256	7.75168e+06	575748	Seed plant	Grangeria borbonica	8.46	13.2				13.2	4.16	1.9	1.9	11.3411	1	smooth	3	mature	Canopy	0	3	0	3	0	2	0	2	101-724-726	same DBH	4.1	86
202391131133	202391131133	Camizard	2023	9	1	9	3	FB	2023	9	1	13	11	33	12	FB-33	-20.3314	57.7255	7.75168e+06	575735	Seed plant	Securinega durissima	8.4	13				13	4.38	2.6	1.9	15.5195	6	scales	3	mature	Canopy	3	0	0	3	1	0	0	1	101-738-740	same DBH	6.2	240
2023911427191	2023911427191	Camizard	2023	9	1	9	3	FB	2023	9	1	14	27	191	14	FB-191	NA	NA	NA	NA	Seed plant	Mimusops petiolaris	4.96	10.7				10.7	2.39	2.2	2	13.823	1	smooth	4	mature	Canopy	16	0	0	16	1	0	0	1		same DBH	4	204
20239114445	20239114445	Camizard	2023	9	1	9	3	FB	2023	9	1	14	4	45	13	FB-88	-20.3313	57.7257	7.75169e+06	575755	Seed plant	Grangeria borbonica	7.95	9.7				9.7	5.35	2.7	2.2	18.6611	6	scales	5	mature	Canopy	0	0	0	0	0	0	0	0	101-756-758	same DBH	2.3	118
202391152869	202391152869	Camizard	2023	9	1	9	3	FB	2023	9	1	15	28	69	15	FB-69	NA	NA	NA	NA	Seed plant	Securinega durissima	6.8	11.6				11.6	3.36	1.95	1.75	10.7207	7	strips	5	mature	Canopy	1	0	0	1	1	0	0	1	101-821-825	same DBH	NA	NA
2023914105590	2023914105590	Camizard	2023	9	14	9	52	65s	2023	9	14	10	55	90	17	65s-90	-20.3318	57.7249	7.75164e+06	575669	Seed plant	Warneckea trinenis	3.39	4.8				4.8	1.44	1.1	1.1	3.80133	1	smooth	2	mature	Canopy	0	0	0	0	0	0	0	0		same DBH	0.9	66
2023914106192	2023914106192	Camizard	2023	9	14	9	52	65s	2023	9	14	10	6	192	16	65s-192	NA	NA	NA	NA	Seed plant	Grangeria borbonica	5.32	14.7				14.7	1.2	3.5	3.1	34.0863	1	smooth	7	mature	Canopy	11	0	0	11	2	0	0	2		same DBH	9.1	280
20239141129194	20239141129194	Camizard	2023	9	14	9	52	65s	2023	9	14	11	29	194	19	65s-194	-20.3326	57.7245	7.75155e+06	575627	Seed plant	Labourdonnaisia glauca	7.47	25.2				25.2	1.7	5.5	4.6	79.4823	3	furrows	4	mature	Canopy	26	2	0	28	5	2	0	7		same DBH	8.4	66
202391411593	202391411593	Camizard	2023	9	14	9	52	65s	2023	9	14	11	5	93	18	65s-39	NA	NA	NA	NA	Seed plant	Diospyros tessellaria	2.24	6.3				6.3	0.86	1.35	1	4.24115	1	smooth	3	mature	Under canopy	0	0	0	0	0	0	0	0	101-862-863	same DBH	NA	NA
20239151011100	20239151011100	Camizard	2023	9	15	9	59	65s	2023	9	15	10	11	100	94	65s-100	-20.3319	57.7247	7.75162e+06	575645	Seed plant	Mimusops maxima	6.75	9.1				9.1	3.31	2.1	1.4	9.23628	3	furrows	4	mature	Canopy	2	0	0	2	1	0	0	1	101964-966	same DBH	5.6	342
202391511412	202391511412	Camizard	2023	9	15	9	59	65s	2023	9	15	11	4	12	95	65s-12	-20.3321	57.7249	7.7516e+06	575669	Seed plant	Diospyros tessellaria	5.7	8.2				8.2	3.8	2.6	1.9	15.5195	6	scales	5	growing	Under canopy	0	4	0	4	0	3	0	3	974-975	same DBH	2.1	45
2023915115614	2023915115614	Camizard	2023	9	15	9	59	65s	2023	9	15	11	56	14	96	65s-14	-20.3324	57.725	7.75157e+06	575676	Seed plant	Securinega durissima	7.99	9.1				9.1	3.61	2.6	1.2	9.80177	6	scales	7	growing	Undercanopy	1	0	0	1	1	0	0	1	992-995	same DBH	2.4	74
2023915124615	2023915124615	Camizard	2023	9	15	9	59	65s	2023	9	15	12	46	15	97	65s-15	-20.3324	57.7251	7.75157e+06	575686	Seed plant	Coptosperma cymosa	3.5	4.6				4.6	1.13	1.2	1.1	4.1469	1	smooth	6	growing	Undercanopy	0	0	0	0	0	0	0	0	fac422df-b142-4180-977d-081a29c855f5.jpg, 15e2e7c9-f473-4550-b71d-91628565d564.jpg, 7d7f90dd-d2f0-46eb-8d94-cff88dea1d72.jpg	same DBH	6.9	152
202391513715	202391513715	Camizard	2023	9	15	9	59	65s	2023	9	15	13	7	15	98	65s-15	-20.3324	57.725	7.75157e+06	575683	Seed plant	Erythrospermum monticulum	5.92	10.1				10.1	2.11	2.3	1.2	8.6708	2	lenticels	6	mature	Undercanopy	4	0	0	4	1	0	0	1	102007-12	same DBH	7.2	188
2023919102518	2023919102518	Camizard	2023	9	19	9	26	65s	2023	9	19	10	25	18	101	65s-18	-20.3326	57.7251	7.75154e+06	575686	Seed plant	Mimusops maxima	8.1	14.2				14.2	5	2.5	1.8	14.1372	3	furrows	4	mature	Canopy	0	0	0	0	0	0	0	0	1020037-41	same DBH	6.55	200
2023919105220	2023919105220	Camizard	2023	9	19	9	26	65s	2023	9	19	10	52	20	102	65s-20	-20.3328	57.725	7.75152e+06	575682	Seed plant	Stillingia lineata	4.48	9.7				9.7	1.75	2.1	1.5	9.89602	3	furrows	3	mature	Under canopy	0	0	0	0	0	0	0	0	1020042-46	same DBH	3.4	110
2023919112754	2023919112754	Camizard	2023	9	19	9	26	65s	2023	9	19	11	27	54	104	65s-54	-20.3328	57.7247	7.75152e+06	575651	Seed plant	Euphorbia pyrifolia	5.58	8.3				8.3	1.2	4	3.4	42.7257	3	furrows	32	mature	Under canopy	0	0	0	0	0	0	0	0	1020047-52	same DBH	1	308
2023919114423	2023919114423	Camizard	2023	9	19	9	26	65s	2023	9	19	11	44	23	105	65s-23	-20.3327	57.7247	7.75153e+06	575651	Seed plant	Mimusops maxima	7.93	10.8				10.8	5.69	1.9	1.7	10.1473	3	furrows	2	mature	Canopy	3	0	0	3	2	0	0	2	1020053-57	same DBH	4.3	102
202391911621	202391911621	Camizard	2023	9	19	9	26	65s	2023	9	19	11	6	21	103	65s-21	-20.3329	57.7251	7.75151e+06	575686	Seed plant	Warneckea trinenis	4.11	5				5	0.32	1.8	1.55	8.76504	1	smooth	6	mature	Under canopy	0	0	0	0	0	0	0	0		same DBH	4.8	20
202391913024	202391913024	Camizard	2023	9	19	9	26	65s	2023	9	19	13	0	24	106	65s-24	-20.3326	57.7244	7.75155e+06	575621	Seed plant	Protium obtisufolium	9.8	15.6				15.6	5.29	3.4	3.2	34.1805	6	scales	4	mature	Canopy	0	0	0	0	0	0	0	0	1020066-71	same DBH	2.1	154
2023919132549	2023919132549	Camizard	2023	9	19	9	26	65s	2023	9	19	13	25	49	107	65s-49	-20.3325	57.7245	7.75156e+06	575626	Seed plant	Euphorbia pyrifolia	7.43	9.5				9.5	1.6	3.5	3.1	34.0863	3	furrows	21	mature	Canopy	0	1	0	1	0	1	0	1		same DBH	2.3	112
2023919134722	2023919134722	Camizard	2023	9	19	9	26	65s	2023	9	19	13	47	22	108	65s-22	-20.3327	57.7248	7.75153e+06	575664	Seed plant	Labourdonnaisia glauca	6.29	10.6				10.6	2.62	2.15	1.6	10.8071	1	smooth	9	mature	Under canopy	30	0	0	30	2	0	0	2	1020077-82	same DBH	3.1	52
2023919425	2023919425	Camizard	2023	9	1	9	3	FB	2023	9	1	9	4	25	2	FB-25	-20.3319	57.7258	7.75162e+06	575763	Seed plant	Mimusops petiolaris	5.45	10.8				10.8	2.5	2.9	2	18.2212	3	furrows	4	mature	Canopy	0	0	0	0	0	0	0	0	101-673-674	same DBH	4.5	352
20239194426	20239194426	Camizard	2023	9	1	9	3	FB	2023	9	1	9	44	26	3	FB-26	-20.3321	57.7259	7.7516e+06	575778	Seed plant	Mimusops petiolaris	5.45	9.4				9.4	3.03	3.16	2.47	24.5208	3	furrows	5	mature	Canopy	0	0	0	0	0	0	0	0	101675-676	same DBH	6.4	24
202391993816	202391993816	Camizard	2023	9	19	9	26	65s	2023	9	19	9	38	16	99	65s-16	-20.3325	57.725	7.75156e+06	575682	Seed plant	Grangeria borbonica	9.55	16.2				16.2	8.7	3.9	2.6	31.8557	1	smooth	4	mature	Canopy	0	0	0	0	0	0	0	0	1020028-31	same DBH	6.8	70
202391995417	202391995417	Camizard	2023	9	19	9	26	65s	2023	9	19	9	54	17	100	65s-17	-20.3325	57.725	7.75155e+06	575683	Seed plant	Mimusops maxima	6.57	8.8				8.8	2.18	2.1	1.8	11.8752	3	furrows	19	mature	Under canopy	0	0	0	0	0	0	0	0	1020032-36	same DBH	6.45	124
2023921111548	2023921111548	Camizard	2023	9	19	9	26	65s	2023	9	21	11	15	48	109	65s-48	-20.3325	57.7243	7.75155e+06	575608	Seed plant	Diospyros tessellaria	7.62	14.7				14.7	4.5	4.2	3.3	43.5425	6	scales	12	mature	Canopy	26	4	0	30	2	1	0	3		same DBH	3.3	156
2023921135546	2023921135546	Camizard	2023	9	19	9	26	65s	2023	9	21	13	55	46	110	65s-46	-20.3324	57.7243	7.75156e+06	575611	Seed plant	Gaertnera psychotrioides	5.12	9.1				9.1	2.52	2.9	2	18.2212	3	furrows	3	mature	Under canopy	0	0	0	0	0	0	0	0	102-293-297	same DBH	5.7	114
2023921142647	2023921142647	Camizard	2023	9	19	9	26	65s	2023	9	21	14	26	47	111	65s-47	-20.3324	57.7242	7.75157e+06	575593	Seed plant	Aphloia theiformis	6.6	9	10.1			19.1	0.9	6.6	4.5	93.3053	6	scales	8	mature	Under canopy	0	0	0	0	0	0	0	0		same DBH	5.3	352
2023921144534	2023921144534	Camizard	2023	9	19	9	26	65s	2023	9	21	14	45	34	112	65s-34	-20.3324	57.7242	7.75157e+06	575601	Seed plant	Labourdonnaisia glauca	6.14	18.8				18.8	2.56	4.7	3.6	53.1557	4	ridges	9	mature	Canopy	0	0	0	0	0	0	0	0		same DBH	8.8	78
2023929115236	2023929115236	Camizard	2023	9	29	9	42	65s	2023	9	29	11	52	36	114	65s-36	-20.3326	57.7236	7.75155e+06	575537	Seed plant	Gaertnera psychotrioides	6.3	8.5				8.5	4.32	1.9	1.3	7.75973	3	furrows	15	mature	Undercanopy	1	0	0	1	1	0	0	1	102-384-389	same DBH	1.2	82
2023929123938	2023929123938	Camizard	2023	9	29	9	42	65s	2023	9	29	12	39	38	115	65s-38	-20.3326	57.7237	7.75155e+06	575546	Seed plant	Grangeria borbonica	5.15	9				9	1.8	1.95	1.95	11.9459	1	smooth	7	mature	Undercanopy	1	9	0	10	1	3	0	4	395-399	same DBH	1.5	4
2023929132838	2023929132838	Camizard	2023	9	29	9	42	65s	2023	9	29	13	28	38	116	65s-38	-20.3326	57.7237	7.75154e+06	575545	Seed plant	Homalium integrifolium	8.17	12.5				12.5	5.01	32	2.3	231.221	1	smooth	4	mature	Canopy	0	0	0	0	0	0	0	0	433-440	same DBH	4.7	206
2023929134437	2023929134437	Camizard	2023	9	29	9	42	65s	2023	9	29	13	44	37	117	65s-37	-20.3326	57.7238	7.75155e+06	575553	Seed plant	Calophyllum tacamahaca	7.17	6.7				6.7	2.31	2.1	1.4	9.23628	2	lenticels	18	mature	Canopy	0	0	0	0	0	0	0	0	441-447	same DBH	4.2	108
202392914735	202392914735	Camizard	2023	9	29	9	42	65s	2023	9	29	14	7	35	118	65s-35	-20.3327	57.7238	7.75154e+06	575550	Seed plant	Calophyllum tacamahaca	9.52	12.2				12.2	2.84	3.3	1.9	19.6978	2	lenticels	10	mature	Canopy	7	1	0	8	1	1	0	2	448-451	same DBH	4.8	86
20239299558	20239299558	Camizard	2023	9	29	9	42	65s	2023	9	29	9	55	8	113	65s-8	-20.3324	57.7234	7.75157e+06	575516	Seed plant	Labourdonnaisia glauca	9.75	17.6				17.6	7.2	3.9	3.3	40.4323	4	ridges	23	mature	Canopy	0	23	0	23	0	2	0	2	102-298-301	same DBH	3.1	140
202415101446	202415101446	Camizard	2024	1	5	9	27	65s	2024	1	5	10	14	46	189	65s-46	-20.3324	57.7243	7.75157e+06	575606	Seed plant	Gaertnera psychotrioides	1.74	1.43				1.43	0.53	1.25	0.99	3.88772	1	smooth	14	growing	Undercanopy	0	0	0	0	0	0	0	0		same age	1.7	40
202415102034	202415102034	Camizard	2024	1	5	9	27	65s	2024	1	5	10	20	34	190	65s-34	-20.3324	57.7242	7.75157e+06	575593	Seed plant	Diospyros tessellaria	1.77	2.4				2.4	0.87	1.1	0.99	3.42119	1	smooth	7	growing	Undercanopy	0	0	0	0	0	0	0	0		same age	3.29	171
20241510313	20241510313	Camizard	2024	1	5	9	27	65s	2024	1	5	10	31	3	191	65s-3	-20.3325	57.7238	7.75156e+06	575559	Seed plant	Warneckea trinenis	1.73	1.07				1.07		1.44	1.27	5.74534	1	smooth	9	growing	Undercanopy	0	0	0	0	0	0	0	0		same age	1.6	51
20241510353	20241510353	Camizard	2024	1	5	9	27	65s	2024	1	5	10	35	3	192	65s-3	-20.3325	57.7238	7.75156e+06	575556	Seed plant	Warneckea trinenis	1.46	0.6				0.6	0.25	1.65	1.32	6.84239	1	smooth	11	growing	Undercanopy	0	1	0	1	0	1	0	1		same age	1.55	245
202415104639	202415104639	Camizard	2024	1	5	9	27	65s	2024	1	5	10	46	39	193	65s-39	-20.3326	57.7238	7.75155e+06	575557	Seed plant	Gaertnera psychotrioides	1.74	1				1	1.09	0.78	0.61	1.49477	1	smooth	6	growing	Undercanopy	0	0	0	0	0	0	0	0		same age	0.76	76
202415105139	202415105139	Camizard	2024	1	5	9	27	65s	2024	1	5	10	51	39	194	65s-39	-20.3326	57.7238	7.75155e+06	575555	Seed plant	Warneckea trinenis	1.57	0.5				0.5	0.55	1.32	0.96	3.98103	1	smooth	7	growing	Undercanopy	0	0	0	0	0	0	0	0		same age	0.89	279
202415105440	202415105440	Camizard	2024	1	5	9	27	65s	2024	1	5	10	54	40	195	65s-40	-20.3326	57.7239	7.75154e+06	575560	Seed plant	Warneckea trinenis	1.75	0.9				0.9	0.88	1.48	1.38	6.41639	1	smooth	5	growing	Undercanopy	0	0	0	0	0	0	0	0		same age	1.52	251
202415105942	202415105942	Camizard	2024	1	5	9	27	65s	2024	1	5	10	59	42	196	65s-42	-20.3327	57.7239	7.75154e+06	575567	Seed plant	Eugenia kanakana	1.76	0.6				0.6	0.4	0.79	0.32	0.794195	1	smooth	5	growing	Undercanopy	0	0	0	0	0	0	0	0		same age	3.87	244
20241510747	20241510747	Camizard	2024	1	5	9	27	65s	2024	1	5	10	7	47	188	65s-47	-20.3324	57.7242	7.75156e+06	575595	Seed plant	Diospyros tessellaria	2.77	1.9				1.9	1.49	0.62	0.33	0.64277	1	smooth	3	growing	Undercanopy	0	0	0	0	0	0	0	0		same age	1.82	102
202415111737	202415111737	Camizard	2024	1	5	9	27	65s	2024	1	5	11	17	37	198	65s-37	-20.3326	57.7238	7.75155e+06	575550	Seed plant	Protium obtisufolium	1.64	1.1				1.1		0.82	0.78	2.00936	2	lenticels	0	growing	Undercanopy	0	0	0	0	0	0	0	0		same age	1.12	50
202415112038	202415112038	Camizard	2024	1	5	9	27	65s	2024	1	5	11	20	38	199	65s-38	-20.3326	57.7237	7.75155e+06	575547	Seed plant	Warneckea trinenis	2.2	0.97				0.97	0.45	1.23	0.71	2.74355	1	smooth	10	growing	Undercanopy	0	1	0	1	0	1	0	1		same age	2.63	45
202415113138	202415113138	Camizard	2024	1	5	9	27	65s	2024	1	5	11	31	38	200	65s-38	-20.3326	57.7237	7.75155e+06	575543	Seed plant	Warneckea trinenis	2.34	1.16				1.16	0.52	1.01	0.98	3.10955	1	smooth	10	growing	Undercanopy	0	2	0	2	0	1	0	1		same age	4.37	230
202415115135	202415115135	Camizard	2024	1	5	9	27	65s	2024	1	5	11	51	35	2875	65s-35	-20.3327	57.7237	7.75154e+06	575546	Seed plant	Gaertnera psychotrioides	2.3	2				2	0.39	1.28	0.97	3.9006	1	smooth	15	growing	Undercanopy	0	0	0	0	0	0	0	0		same age	3.28	160
20241511544	20241511544	Camizard	2024	1	5	9	27	65s	2024	1	5	11	5	44	197	65s-44	-20.3328	57.7239	7.75153e+06	575568	Seed plant	Eugenia kanakana	3.36	1.7				1.7	0.08	0.79	0.7	1.7373	1	smooth		growing	Undercanopy	0	0	0	0	0	0	0	0		same age	0.46	311
202415123436	202415123436	Camizard	2024	1	5	9	27	65s	2024	1	5	12	34	36	47	65s-36	-20.3326	57.7236	7.75155e+06	575535	Seed plant	Warneckea trinenis	1.69	0.95				0.95	0.49	1.76	1.14	6.30329	1	smooth	9	growing	Undercanopy	0	0	0	0	0	0	0	0		same age	2.22	228
20241512418	20241512418	Camizard	2024	1	5	9	27	65s	2024	1	5	12	41	8	3961	65s-8	-20.3324	57.7234	7.75157e+06	575516	Seed plant	Diospyros tessellaria	2.62	1.8				1.8	0.7	1.36	1.34	5.72524	1	smooth	11	growing	Undercanopy	0	2	0	2	0	1	0	1		same age	3.34	148
202415125649	202415125649	Camizard	2024	1	5	9	27	65s	2024	1	5	12	56	49	4100	65s-49	-20.3325	57.7245	7.75156e+06	575623	Seed plant	Diospyros tessellaria	1.96	0.97				0.97	0.75	0.8	0.68	1.70903	1	smooth	4	growing	Undercanopy	0	0	0	0	0	0	0	0		same age	4.48	186
202415132150	202415132150	Camizard	2024	1	5	9	27	65s	2024	1	5	13	21	50	3936	65s-50	-20.3325	57.7245	7.75156e+06	575625	Seed plant	Labourdonnaisia glauca	2.65	1.9				1.9	1.53	0.53	0.47	0.782571	1	smooth	4	growing	Undercanopy	0	0	0	0	0	0	0	0		same age	0.33	215
202415133552	202415133552	Camizard	2024	1	5	9	27	65s	2024	1	5	13	35	52	4104	65s-52	-20.3325	57.7245	7.75155e+06	575631	Seed plant	Warneckea trinenis	2.23	1.3				1.3	0.53	1.32	1.09	4.52012	1	smooth	21	growing	Undercanopy	0	0	0	0	0	0	0	0		same age	3.3	38
202415135252	202415135252	Camizard	2024	1	5	9	27	65s	2024	1	5	13	52	52	4109	65s-52	-20.3326	57.7245	7.75155e+06	575628	Seed plant	Warneckea trinenis	2.26	1.05				1.05	0.57	0.92	0.83	2.39892	1	smooth	21	growing	Undercanopy	0	0	0	0	0	0	0	0		same age	1.09	296
20241593053	20241593053	Camizard	2024	1	5	9	27	65s	2024	1	5	9	30	53	185	65s-53	-20.3326	57.7246	7.75155e+06	575638	Seed plant	Gaertnera psychotrioides	2.62	1.76				1.76	0.51	1.65	1.43	7.41259	1	smooth	17	growing	Undercanopy	0	0	0	0	0	0	0	0		same age	2.57	120
20241594024	20241594024	Camizard	2024	1	5	9	27	65s	2024	1	5	9	40	24	186	65s-24	-20.3326	57.7244	7.75155e+06	575621	Seed plant	Warneckea trinenis	3.42	1.91				1.91	0.42	1.05	1.01	3.33166	1	smooth	28	growing	Undercanopy	0	0	0	0	0	0	0	0		same age	0.86	86
20241594848	20241594848	Camizard	2024	1	5	9	27	65s	2024	1	5	9	48	48	187	65s-48	-20.3325	57.7243	7.75156e+06	575606	Seed plant	Psiloxylon mauritianum	3.37					0	0.67	1.98	1.94	12.0675	6	scales	10	growing	Undercanopy	0	0	0	0	0	0	0	0		same age	1.91	232
20245271157100	20245271157100	Brise Fer	2024	5	26	20	46	65s	2024	5	27	11	57	100	1514	65s-100	-20.3758	57.4437	7.74687e+06	546302	Seed plant	Harungana madagascariensis	8.7	20.3				20.3	6.46	4.2	3.1	40.9035	3	furrows	5	senescent	Canopy	9	2	7	18	2	2	1	5	1	Hama
20245271316101	20245271316101	Brise Fer	2024	5	26	20	46	65s	2024	5	27	13	16	101	1445	65s-101	-20.3758	57.4436	7.74687e+06	546296	Seed plant	Harungana madagascariensis	2.17	13.2				13.2	7.16	4.1	2.6	33.4894	3	furrows	2	senescent	Canopy	4	5	3	12	2	2	2	6	1	Hama
20245271411102	20245271411102	Brise Fer	2024	5	26	20	46	65s	2024	5	27	14	11	102	999	65s-102	-20.3758	57.4436	7.74687e+06	546297	Seed plant	Harungana madagascariensis	2.17	40.5				40.5	7.5	9	8.4	237.504	3	furrows	6	senescent	Canopy	12	57	8	77	1	2	1	4	1	Hama
202452785499	202452785499	Brise Fer	2024	5	26	20	46	65s	2024	5	27	8	54	99	1493	65s-99	-20.3758	57.4437	7.74687e+06	546305	Seed plant	Harungana madagascariensis	13.92	24.7				24.7	9.74	3.5	3.2	35.1858	3	furrows	2	senescent	Canopy	19	5	4	28	2	3	2	7	1	Hama
20246181050141	20246181050141	Brise Fer	2024	5	26	20	46	65s	2024	6	18	10	50	141	2796	65s-141	-20.3759	57.4435	7.74685e+06	546283	Seed plant	Harungana madagascariensis	13.8	14.6	21.5			36.1	4.81	7.3	4.2	96.3212	3	furrows	5	mature	Canopy	19	15	2	36	2	3	2	7	1	Hama
2024623936142	2024623936142	Brise Fer	2024	6	23	9	35	65s	2024	6	23	9	36	142	8395	65s-142	-20.3758	57.4436	7.74687e+06	546293	Seed plant	Harungana madagascariensis	13	26.3				26.3	9	4.7	4.3	63.4916	3	furrows	3	mature	Canopy		39	30	69	0	4	1	5		Hama
2024711849152	2024711849152	Brise Fer	2024	7	11	8	48	65s	2024	7	11	8	49	152	7763	65s-152	-20.3758	57.4436	7.74687e+06	546296	Seed plant	Harungana madagascariensis	12	35.5	15.7			51.2	4.3	7	6	131.947	3	furrows	6	mature	Canopy	103	35	2	140	5	5	2	12	1	Hama
20247141039167	20247141039167	Brise Fer	2024	7	14	10	37	65s	2024	7	14	10	39	167	6256	65s-167	-20.3761	57.4432	7.74684e+06	546253	Seed plant	Harungana madagascariensis	9	17.4				17.4	7	3.27	2.87	29.4835	3	furrows	2	senescent	Canopy	11	2	2	15	3	2	2	7	1	Hama
20247181149171	20247181149171	Brise Fer	2024	7	18	9	53	65s	2024	7	18	11	49	171	7021	65s-171	-20.3761	57.4431	7.74683e+06	546242	Seed plant	Harungana madagascariensis	14	41.8				41.8	6	13	7	285.885	3	furrows	5	mature	Canopy	88	44	1	133	4	3	1	8	1	Hama
2024718954167	2024718954167	Brise Fer	2024	7	18	9	53	65s	2024	7	18	9	54	167	6934	65s-167	-20.3761	57.4432	7.74684e+06	546253	Seed plant	Harungana madagascariensis	10	13.7				13.7	8	1.5	2	9.42478	3	furrows	2	mature	Canopy	82	5	0	87	2	2	1	5	1	Hama
2024726124164	2024726124164	Brise Fer	2024	7	26	8	50	65s	2024	7	26	12	4	164	5458	65s-164	-20.376	57.4433	7.74684e+06	546261	Seed plant	Harungana madagascariensis	13	22.3				22.3	9	65	5	1021.02	3	furrows	4	mature	Canopy	39	1	3	43	5	1	3	9		Hama
20247261344181	20247261344181	Brise Fer	2024	7	26	8	50	65s	2024	7	26	13	44	181	3654	65s-181	-20.376	57.4435	7.74684e+06	546283	Seed plant	Harungana madagascariensis	14	20.6				20.6	7.64	4.2	2.8	36.9451	3	furrows		mature	Canopy	13	4	0	17	6	1	1	8	1	Hama
2024726851166	2024726851166	Brise Fer	2024	7	26	8	50	65s	2024	7	26	8	51	166	5409	65s-166	-20.376	57.4432	7.74685e+06	546255	Seed plant	Harungana madagascariensis	12	16.8				16.8	5.2	6	2.9	54.6637	3	furrows	2	mature	Canopy	55	17	0	72	2	2	0	4	1	Hama
2024741126147	2024741126147	Brise Fer	2024	7	4	11	25	65s	2024	7	4	11	26	147	8430	65s-147	-20.3757	57.4435	7.74688e+06	546281	Seed plant	Harungana madagascariensis	13	30				30	9	5.7	3.5	62.6748	3	furrows	2	senescent	Canopy	45	3	12	60	2	1	1	4	1	Hama
2024751045149	2024751045149	Brise Fer	2024	7	5	8	13	65s	2024	7	5	10	45	149	7750	65s-149	-20.3755	57.4436	7.7469e+06	546295	Seed plant	Harungana madagascariensis	13	26.9				26.9	4.8	6	5	94.2478	3	furrows	2	mature	Canopy	35	17	2	54	3	3	2	8	1	Hama
2024751415150	2024751415150	Brise Fer	2024	7	5	8	13	65s	2024	7	5	14	15	150	8110	65s-150	-20.3756	57.4436	7.7469e+06	546288	Seed plant	Harungana madagascariensis	14	33.5	30.5			64	6	11	5.5	190.066	3	furrows	4	mature	Canopy	61	59	2	122	3	3	1	7	1	Hama
202475814148	202475814148	Brise Fer	2024	7	5	8	13	65s	2024	7	5	8	14	148	204	65s-148	-20.3757	57.4439	7.74688e+06	546326	Seed plant	Harungana madagascariensis	11.5	21.7	14.4			36.1	8.5	4.7	4.2	62.015	3	furrows	4	mature	Canopy	12	7	4	23	2	4	2	8	1	Hama
202475945148	202475945148	Brise Fer	2024	7	5	8	13	65s	2024	7	5	9	45	148	9125	65s-148	-20.3757	57.4439	7.74688e+06	546326	Seed plant	Harungana madagascariensis	13	13.1				13.1	7.5	4.7	4	59.0619	3	furrows	2	mature	Canopy	0	2	0	2	0	2	0	2	1	Hama
2024771012148	2024771012148	Brise Fer	2024	7	7	10	10	65s	2024	7	7	10	12	148	327	65s-148	-20.3757	57.4439	7.74688e+06	546326	Seed plant	Harungana madagascariensis	14	33.7				33.7	9	5	4.7	73.8274	3	furrows	3	senescent	Canopy	7	22	10	39	2	5	4	11	1	Hama
202477133151	202477133151	Brise Fer	2024	7	7	10	10	65s	2024	7	7	13	3	151	1496	65s-151	-20.3758	57.4436	7.74687e+06	546297	Seed plant	Harungana madagascariensis	14	26.9				26.9	10	5.5	3.5	60.4757	3	furrows	3	mature	Canopy	32	1	0	33	4	1	0	5	1	Hama
2024811058167	2024811058167	Brise Fer	2024	7	26	8	50	65s	2024	8	1	10	58	167	5428	65s-167	-20.376	57.4432	7.74685e+06	546253	Seed plant	Psiloxylon mauritianum	8	10.3	3.5			13.8	0.8	3.6	2.8	31.6673	6	scales	21	mature	Under canopy	5	1	1	7	1	1	1	3	3	same DBH	9.7	354
2024811141167	2024811141167	Brise Fer	2024	7	26	8	50	65s	2024	8	1	11	41	167	6367	65s-167	-20.3761	57.4432	7.74684e+06	546251	Seed plant	Eugenia pollicina	10	16.3				16.3	1.7	5	3.3	51.8363	1	strips	5	mature	Canopy	0	4	4	8	0	2	2	4	3	same DBH	5.3	340
2024811252171	2024811252171	Brise Fer	2024	7	26	8	50	65s	2024	8	1	12	52	171	352	65s-171	-20.3762	57.4431	7.74682e+06	546238	Seed plant	Mimusops maxima	15	38.3				38.3	5.5	5	5	78.5398	6	furrows	4	mature	Canopy	94	5	0	99	3	1	0	4	3	same DBH	10.7	210
20248131027101	20248131027101	Brise Fer	2024	8	2	8	21	65s	2024	8	13	10	27	101	1519	65s-101	-20.3759	57.4436	7.74686e+06	546296	Seed plant	Cassine orientalis	10	12.2				12.2	6	3.8	3	35.8142	1	smooth	9	mature	Canopy	0	5	3	8	0	1	2	3	3	same DBH	10.5	186
20248131110163	20248131110163	Brise Fer	2024	8	2	8	21	65s	2024	8	13	11	10	163	4401	65s-163	-20.376	57.4433	7.74685e+06	546261	Seed plant	Harungana madagascariensis	12	19.2				19.2	10	4	3	37.6991	3	furrows	3	mature	Canopy	9	1	1	11	4	1	1	6	1	Hama
20248131149163	20248131149163	Brise Fer	2024	8	2	8	21	65s	2024	8	13	11	49	163	5388	65s-163	-20.376	57.4433	7.74685e+06	546260	Seed plant	Eugenia pollicina	13	19.8				19.8	3.6	6	5	94.2478	6	strips	13	mature	Canopy	0	8	0	8	0	2	0	2	3	same DBH	2	240
202481954181	202481954181	Brise Fer	2024	7	26	8	50	65s	2024	8	1	9	54	181	2891	65s-181	-20.376	57.4436	7.74684e+06	546290	Seed plant	Mimusops maxima	11	19.4				19.4	6	4.3	3.4	45.9301	3	furrows	8	mature	Canopy	6	3	0	9	2	2	0	4	3	same DBH	7.6	74
20248201016152	20248201016152	Brise Fer	2024	8	20	8	27	65s	2024	8	20	10	16	152	868	65s-152	-20.3758	57.4436	7.74687e+06	546296	Seed plant	Cassine orientalis	6.5	4.95				4.95	0.5	3	2.5	23.5619	1	smooth	29	growing	Under canopy	0	0	0	0	0	0	0	0	2	same age	1.8	180
20248201028149	20248201028149	Brise Fer	2024	8	20	8	27	65s	2024	8	20	10	28	149	123	65s-149	-20.3755	57.4437	7.7469e+06	546298	Seed plant	Securinega durissima	4.22	3.05				3.05	2.3	1.1	0.75	2.59181	1	smooth	9	growing	Under canopy	0	0	0	0	0	0	0	0	2	same age	3	52
20248201038150	20248201038150	Brise Fer	2024	8	20	8	27	65s	2024	8	20	10	38	150	763	65s-150	-20.3756	57.4436	7.74689e+06	546287	Seed plant	Eugenia pollicina	9	6.5				6.5	2.2	2.3	2.2	15.8965	3	furrows	35	growing	Under canopy	9	4	0	13	2	3	0	5	2	same age	3.2	204
20248201122100	20248201122100	Brise Fer	2024	8	20	8	27	65s	2024	8	20	11	22	100	8042	65s-100	-20.3758	57.4437	7.74687e+06	546302	Seed plant	Securinega durissima	5.9	2.8				2.8	3.1	1.7	0.9	4.80664	2	lenticels	15	growing	Under canopy	0	0	0	0	0	0	0	0	2	same age	3	16
2024820113399	2024820113399	Brise Fer	2024	8	20	8	27	65s	2024	8	20	11	33	99	8074	65s-99	-20.3757	57.4437	7.74688e+06	546303	Seed plant	Eugenia pollicina	5	4.35				4.35	2	1.6	1.6	8.04248	3	furrows	12	growing	Under canopy	0	5	0	5	0	1	0	1	2	same age	2.9	306
20248201155101	20248201155101	Brise Fer	2024	8	20	8	27	65s	2024	8	20	11	55	101	0	65s-101	-20.3758	57.4436	7.74687e+06	546296	Seed plant	Diospyros tessellaria	2.2	1.3				1.3	0.9	1.1	0.7	2.41903	1	smooth	18	growing	Under canopy	0	9	0	9	0	2	0	2	2	same age	1	140
20248201239142	20248201239142	Brise Fer	2024	8	20	8	27	65s	2024	8	20	12	39	142	8398	65s-142	-20.3758	57.4436	7.74687e+06	546293	Seed plant	Syzygium glomeratum	4.9	5.43				5.43	0.9	1.9	1.6	9.55044	1	smooth	10	growing	Under canopy	0	23	3	26	0	1	1	2	2	same age	1	344
20248201334141	20248201334141	Brise Fer	2024	8	20	8	27	65s	2024	8	20	13	34	141	2897	65s-141	-20.376	57.4435	7.74685e+06	546282	Seed plant	Cassine orientalis	4.67	3				3	2.6	1.5	1.5	7.06858	1	smooth	14	growing	Under canopy	0	2	0	2	0	1	0	1	2	same age	1.5	204
20248201347181	20248201347181	Brise Fer	2024	8	20	8	27	65s	2024	8	20	13	47	181	3733	65s-181	-20.376	57.4435	7.74684e+06	546281	Seed plant	Securinega durissima	4.3	3.2				3.2	1.4	1.7	1	5.34071	1	smooth	8	growing	Under canopy	0	1	1	2	0	1	1	2	2	same age	2	264
20248201411163	20248201411163	Brise Fer	2024	8	20	8	27	65s	2024	8	20	14	11	163	0	65s-163	-20.376	57.4433	7.74685e+06	546265	Seed plant	Warneckea trinenis	2.28	1.45				1.45	0.45	1.05	0.9	2.96881	1	smooth	3	growing	Under canopy	1	2	0	3	1	1	0	2	2	same age	3.9	90
20248201428166	20248201428166	Brise Fer	2024	8	20	8	27	65s	2024	8	20	14	28	166	5403	65s-166	-20.376	57.4433	7.74685e+06	546256	Seed plant	Erythrospermum monticulum	4.02	1.77				1.77	3.9	0.8	0.7	1.75929	1	smooth	3	growing	Under canopy	0	0	0	0	0	0	0	0		same age	3.1	160
2024820143164	2024820143164	Brise Fer	2024	8	20	8	27	65s	2024	8	20	14	3	164	5457	65s-164	-20.376	57.4433	7.74684e+06	546261	Seed plant	Warneckea trinenis	4.02	2.3				2.3	0.2	1.1	1.1	3.80133	1	smooth	14	growing	Under canopy	0	0	0	0	0	0	0	0	2	same age	0.6	16
20248201453171	20248201453171	Brise Fer	2024	8	20	8	27	65s	2024	8	20	14	53	171	7055	65s-171	-20.3762	57.4431	7.74683e+06	546240	Seed plant	Mimusops maxima	6	6.6				6.6	3	2.6	1.8	14.7027	1	smooth	6	growing	Under canopy	0	0	0	0	0	0	0	0	2	same age	3.5	220
20248201522167	20248201522167	Brise Fer	2024	8	20	8	27	65s	2024	8	20	15	22	167	5473	65s-167	-20.3761	57.4433	7.74684e+06	546260	Seed plant	Warneckea trinenis	2.8	1.44				1.44	1	1.6	0.9	4.52389	1	smooth	10	growing	Under canopy	0	0	0	0	0	0	0	0	2	same age	8	60
2024820153167	2024820153167	Brise Fer	2024	8	20	8	27	65s	2024	8	20	15	3	167	6288	65s-167	-20.3761	57.4432	7.74683e+06	546250	Seed plant	Cassine orientalis	4.32	2.8				2.8	1.2	2.65	2	16.6504	1	smooth	14	growing	Undercanopy	0	0	1	1	0	0	1	1	2	same age	3	234
2024820831102	2024820831102	Brise Fer	2024	8	20	8	27	65s	2024	8	20	8	31	102	971	65s-102	-20.3758	57.4436	7.74687e+06	546290	Seed plant	Mimusops maxima	5	5.2				5.2	2.12	1.5	1.45	6.83296	1	smooth	12	growing	Under canopy	0	9	0	9	0	1	0	1	2	same age	7	300
2024820927148	2024820927148	Brise Fer	2024	8	20	8	27	65s	2024	8	20	9	27	148	8691	65s-148	-20.3757	57.4439	7.74688e+06	546325	Seed plant	Syzygium glomeratum	3.32	2.7				2.7	0.77	1.15	1	3.61283	1	smooth	22	growing	Under canopy	0	0	0	0	0	0	0	0	2	same age	2	348
202482093148	202482093148	Brise Fer	2024	8	20	8	27	65s	2024	8	20	9	3	148	329	65s-148	-20.3757	57.4439	7.74688e+06	546327	Seed plant	Diospyros tessellaria	4.32	3.2				3.2	2.6	1.3	0.8	3.26726	1	smooth	11	growing	Under canopy	0	8	0	8	0	1	0	1	2	same age	1	100
2024820938148	2024820938148	Brise Fer	2024	8	20	8	27	65s	2024	8	20	9	38	148	8310	65s-148	-20.3757	57.4438	7.74688e+06	546317	Seed plant	Mimusops maxima	5.25	3.1				3.1	1.5	1.15	1.15	4.15476	1	smooth	20	growing	Under canopy	3	1	0	4	1	1	0	2	2	same age	2.7	260
2024820958151	2024820958151	Brise Fer	2024	8	20	8	27	65s	2024	8	20	9	58	151	862	65s-151	-20.3758	57.4437	7.74687e+06	546298	Seed plant	Cassine orientalis	6.5	4.1				4.1	1.9	2.4	1.95	14.7027	1	smooth	26	growing	Under canopy	0	1	2	3	0	1	2	3	2	same age	3.8	20
202482104141	202482104141	Brise Fer	2024	8	2	8	21	65s	2024	8	2	10	4	141	8613	65s-141	-20.3759	57.4435	7.74685e+06	546285	Seed plant	Mimusops maxima	15	36.6				36.6	8	6	5.5	103.673	4	furrows	3	mature	Canopy	0	6	7	13	0	4	2	6	138-140	same DBH	2.5	80
2024821134147	2024821134147	Brise Fer	2024	8	2	8	21	65s	2024	8	2	11	34	147	819	65s-147	-20.3756	57.4435	7.7469e+06	546285	Seed plant	Psiloxylon mauritianum	15	31.9				31.9	5	7.5	5	117.81	6	scales	2	mature	Canopy	0	8	7	15	0	3	1	4	3	same DBH	12	26
2024821318142	2024821318142	Brise Fer	2024	8	2	8	21	65s	2024	8	2	13	18	142	2772	65s-142	-20.3759	57.4437	7.74686e+06	546302	Seed plant	Syzygium glomeratum	14	26.2				26.2	10	6	5	94.2478	1	smooth	4	mature	Canopy	12	4	4	20	2	2	1	5	3	same DBH	12	130
2024821427100	2024821427100	Brise Fer	2024	8	2	8	21	65s	2024	8	2	14	27	100	2220	65s-100	-20.3759	57.4437	7.74686e+06	546302	Seed plant	Ficus mauritiana	11	20.05				20.05	0.8	6.5	6	122.522	1	smooth	4	mature	Canopy	1	23	14	38	1	4	1	6	3	same DBH	7	180
202482144099	202482144099	Brise Fer	2024	8	2	8	21	65s	2024	8	2	14	40	99	1491	65s-99	-20.3758	57.4436	7.74687e+06	546297	Seed plant	Securinega durissima	15	24.55				24.55	10	6	4.5	84.823	6	scales	4	mature	Canopy	0	10	28	38	0	4	2	6	3	same DBH	11	224
202482822164	202482822164	Brise Fer	2024	8	2	8	21	65s	2024	8	2	8	22	164	6274	65s-164	-20.3761	57.4432	7.74684e+06	546254	Seed plant	Protium obtisufolium	11	22.3				22.3	6	4	3.6	45.2389	6	scales	4	mature	Canopy	0	1	1	2	0	1	1	2	123-124	same DBH	10	230
2024828842147	2024828842147	Brise Fer	2024	8	28	8	41	65s	2024	8	28	8	42	147	1998	65s-147	-20.3756	57.4434	7.74689e+06	546271	Seed plant	Eugenia kanakana	6.5	4.5				4.5	2.5	1.5	1.3	6.12611	1	smooth	2	growing	Undercanopy	0	5	1	6	0	3	1	4	2	same age	10	282
20248299166	20248299166	Brise Fer	2024	8	2	8	21	65s	2024	8	2	9	9	166	4497	65s-166	-20.376	57.4433	7.74685e+06	546260	Seed plant	Protium obtisufolium	10	16				16	7	3.4	3.4	36.3168	6	scales	2	mature	Low canopy	1	1	1	3	1	1	1	3	136-137	same DBH	4.2	84
2024881157182	2024881157182	Brise Fer	2024	8	2	8	21	65s	2024	8	8	11	57	182	1108	65s-182	-20.3759	57.4437	7.74686e+06	546300	Seed plant	Cassine orientalis	14	40.5				40.5	3	7.6	6.4	152.807	1	smooth	6	mature	Canopi	0	7	53	60	0	3	2	5	3	same DBH	12.6	166
2024881325148	2024881325148	Brise Fer	2024	8	2	8	21	65s	2024	8	8	13	25	148	398	65s-148	-20.3757	57.444	7.74688e+06	546335	Seed plant	Securinega durissima	10	13.2				13.2	5	3.3	2.2	22.808	6	scales	2	mature	Canopy	18	3	13	34	3	2	1	6	3	same DBH	8.6	80
2024881446148	2024881446148	Brise Fer	2024	8	2	8	21	65s	2024	8	8	14	46	148	8579	65s-148	-20.3757	57.4439	7.74688e+06	546324	Seed plant	Sideroxylon grandiflorum	14	36.4				36.4	6.5	4.8	4	60.3186	6	scales	3	mature	Canopy	8	17	4	29	3	5	2	10	3	same DBH	9.8	260
2024891051152	2024891051152	Brise Fer	2024	8	2	8	21	65s	2024	8	9	10	51	152	7817	65s-152	-20.3757	57.4437	7.74688e+06	546305	Seed plant	Canarium paniculatum	14	50.1				50.1	1.7	12	11	414.69	7	scales	6	mature	Canopy	3	15	0	18	2	6	0	8	3	same DBH	12	40
202489105151	202489105151	Brise Fer	2024	8	2	8	21	65s	2024	8	9	10	5	151	802	65s-151	-20.3757	57.4437	7.74688e+06	546305	Seed plant	Cassine orientalis	13	25.8				25.8	6.5	5.5	5.5	95.0332	1	smooth	4	mature	Canopy	0	9	3	12	1	2	2	5	3	same DBH	15	30
202489122148	202489122148	Brise Fer	2024	8	2	8	21	65s	2024	8	9	12	2	148	294	65s-148	-20.3757	57.4439	7.74688e+06	546328	Seed plant	Psiloxylon mauritianum	14	32.7				32.7	6	12	7	263.894	7	strips	5	mature	Canopy	0	24	8	32	0	5	2	7	3	same DBH	3.5	30
202489142149	202489142149	Brise Fer	2024	8	2	8	21	65s	2024	8	9	14	2	149	399	65s-149	-20.3756	57.4437	7.74689e+06	546302	Seed plant	Cassine orientalis	13	28.7				28.7	7	7.7	5.5	133.046	1	smooth	3	mature	Canopy	0	2	0	2	0	2	0	2	104-469-470	same DBH	15	150
2024891425150	2024891425150	Brise Fer	2024	8	2	8	21	65s	2024	8	9	14	25	150	9302	65s-150	-20.3756	57.4437	7.7469e+06	546300	Seed plant	Syzygium glomeratum	1.67	71				71	7	11.5	11	397.411	6	scales	5	mature	Canopy	0	17	10	27	0	4	2	6	3	same DBH	12	90
[truncated: 2 more columns]
