# Supplementary material for: Harungana madagascariensis (Hypericaceae) is a key phorophyte for native epiphytes and lianas during ecological restoration: case study on an oceanic island
Source: PeerJ. 2025 Dec 19;13:e20520. doi: 10.7717/peerj.20520 (PMC12721127; doi:10.7717/peerj.20520)
Supplement: Supplemental Information 8 [file peerj-13-20520-s008.xlsx]

## Sheet: Sheet1
TreeID_for	TreeID_nb	gps_device_date_explo_year	gps_device_date_explo_month	gps_device_date_explo_day	gps_device_time_explo_hour	gps_device_time_explo_minute	gps_device_device	host_tree_date_year	host_tree_date_month	host_tree_date_day	host_tree_time_hour	host_tree_time_minute	host_tree_waypoint_id	taxon_group	taxon_group_qualifier	taxon_group_label	species	species_qualifier	species_label	familly	det_conf_label	height	compass_orientation	size_x	size_y	size_z	max_length	max_width	bryophyte	phenophase	phenophase_label	number_leaves	number_flowers	number_fruits	frond	frond_with_spores	rhizome	phorophyte	phorophyte_label	stage_epiphyte_label	photo_sp_ext	observation	behav_pl_label	indiv_tag	time_indiv_hour	time_indiv_minute	indiv_uuid
202388912191	202388912191	2023	8	8	9	10	etrex	2023	8	8	9	12	191	1		Seed plant	zz		Angraecum pectinatum	orchidaceae	valid	49	270	1.5	2.2	2.2	1.9		false	0	vegetating	3	0	0		0		1	main trunk	Juvenile/Sapling	710-711		vegetating	etrex-191/1	9	20	23966bcd-3cdb-4f6a-ae43-b3f876150ea1
202388912191	202388912191	2023	8	8	9	10	etrex	2023	8	8	9	12	191	1		Seed plant	zz		Angraecum sp.	orchidaceae	valid	33	146	0.5	0.3	0.2	0.3		false	0	vegetating	2	0	0		0		1	main trunk	Juvenile/Sapling	712 a 716	Geetika 93455	vegetating	etrex-191/2	9	28	20a78efd-9e1b-4a2a-8748-da24f2ba9490
202388912191	202388912191	2023	8	8	9	10	etrex	2023	8	8	9	12	191	1		Seed plant	zz		Angraecum sp.	orchidaceae	valid	36	170	0.9	1	0.8	0.8		false	0	vegetating	2	0	0		0		1	main trunk	Juvenile/Sapling	717 a 718		vegetating	etrex-191/3	9	37	cd6921c4-fdd3-494c-ae95-620e9edc3015
202388912191	202388912191	2023	8	8	9	10	etrex	2023	8	8	9	12	191	1		Seed plant	zz		Angraecum sp.	orchidaceae	valid	36	138	0.2	0.2	1	0.3		false	0	vegetating	1	0	0		0		1	main trunk	Juvenile/Sapling	720		vegetating	etrex-191/4	9	43	45faeba2-bb22-4755-841d-cb0f9d45afc7
202388912191	202388912191	2023	8	8	9	10	etrex	2023	8	8	9	12	191	1		Seed plant	zz		Angraecum sp.	orchidaceae	valid	51	150	1	1.9	1.5	0.9		false	0	vegetating	4	0	0		0		1	main trunk	Juvenile/Sapling	722	Leaves cut	vegetating	etrex-191/5	9	50	b98c26b3-48f4-4844-965e-fa147ba3e82e
202388912191	202388912191	2023	8	8	9	10	etrex	2023	8	8	9	12	191	1		Seed plant	zz		Angraecum sp.	orchidaceae	valid	52	108	0.3	1.4	1	0.9		false	0	vegetating	5	0	0		0		1	main trunk	Juvenile/Sapling	723 et 724		vegetating	etrex-191/6	9	55	efeb6ed8-d1fa-4b42-93a1-9283cb5d2f9c
202388912191	202388912191	2023	8	8	9	10	etrex	2023	8	8	9	12	191	1		Seed plant	zz		Angraecum sp.	orchidaceae	valid	57	110	4.2	4.5	2.1	2.6		false	0	vegetating	4	0	0		0		1	main trunk	Subadult	725		vegetating	etrex-191/7	10	0	7c08c52a-3ce4-4b66-99d3-1ac63acd1b42
202388912191	202388912191	2023	8	8	9	10	etrex	2023	8	8	9	12	191	1		Seed plant	zz		Angraecum sp.	orchidaceae	valid	65	110	0.5	1	1.8	0.7		false	0	vegetating	3	0	0		0		1	main trunk	Juvenile/Sapling	726		vegetating	etrex-191/8	10	3	17d0229e-a8b4-4454-ad04-ebb308cca1a4
202388912191	202388912191	2023	8	8	9	10	etrex	2023	8	8	9	12	191	1		Seed plant	zz		Angraecum sp.	orchidaceae	valid	74	70	2.5	2	1.5	2		false	0	vegetating	4	0	0		0		1	main trunk	Subadult	727 a 732		vegetating	etrex-191/9	10	6	e52d3b70-48f7-40a4-9b4a-4cd2316fb2f7
202388912191	202388912191	2023	8	8	9	10	etrex	2023	8	8	9	12	191	1		Seed plant	zz		Angraecum sp.	orchidaceae	valid	77	108	2	3	2.1	2		false	0	vegetating	4	0	0		0		1	main trunk	Subadult	733 et 734		vegetating	etrex-191/10	10	12	e07cf99f-1294-44fc-b108-337acaad57b0
202388912191	202388912191	2023	8	8	9	10	etrex	2023	8	8	9	12	191	1		Seed plant	zz		Angraecum sp.	orchidaceae	valid	80	154	2.3	1.9	3	2.3		false	0	vegetating	3	0	0		0		1	main trunk	Subadult	735		vegetating	etrex-191/11	10	15	6279e28f-a3bd-4dfc-9668-49720d564d6d
202388912191	202388912191	2023	8	8	9	10	etrex	2023	8	8	9	12	191	1		Seed plant	zz		Angraecum sp.	orchidaceae	valid	80	108	3.5	4.8	3.3	3.2		false	0	vegetating	4	0	0		0		1	main trunk	Subadult	737 et 738 et 739		vegetating	etrex-191/12	10	18	759b8d83-bfb8-486b-b589-5ee6502c276f
202388912191	202388912191	2023	8	8	9	10	etrex	2023	8	8	9	12	191	1		Seed plant	zz		Angraecum sp.	orchidaceae	valid	82	108	9.5	8	6	7		false	0	vegetating	5	0	0		0		1	main trunk	Subadult	741 et 743		vegetating	etrex-191/13	10	22	35ed0462-bff1-4e0d-aeb5-34a13efcbece
202388912191	202388912191	2023	8	8	9	10	etrex	2023	8	8	9	12	191	1		Seed plant	zz		Angraecum sp.	orchidaceae	valid	92	176	3	3.5	2.6	3.8		false	0	vegetating	4	0	0		0		1	main trunk	Subadult	744 et 746	Cut leaves	vegetating	etrex-191/14	10	24	3657c354-7e81-4271-a6c7-ca4e9147b420
202388912191	202388912191	2023	8	8	9	10	etrex	2023	8	8	9	12	191	1		Seed plant	zz		Angraecum sp.	orchidaceae	valid	97	176	1.5	2.9	2.3	1.5		false	0	vegetating	4	0	0		0		1	main trunk	Juvenile/Sapling	748 et 753		vegetating	etrex-191/15	10	27	ff09a76b-1871-4cfc-9e80-68d735a9474a
202388912191	202388912191	2023	8	8	9	10	etrex	2023	8	8	9	12	191	1		Seed plant	zz		Angraecum sp.	orchidaceae	valid	122	48	14.1	13.8	7	9.5		false	0	dry/fallen fruit	6	0	0		0		1	main trunk	Adult	754 et 755		vegetating	etrex-191/16	10	30	d76a3cfc-ee1e-4265-8280-69251790cc21
202388912191	202388912191	2023	8	8	9	10	etrex	2023	8	8	9	12	191	1		Seed plant	zz		Angraecum sp.	orchidaceae	valid	107	252	9	10.5	8	9.1		false	0	vegetating	6	0	0		0		1	main trunk	Adult	758 et 760		vegetating	etrex-191/17	10	36	b06df429-4b62-4c8d-9c61-32b9b7d747de
202388912191	202388912191	2023	8	8	9	10	etrex	2023	8	8	9	12	191	1		Seed plant	zz		Angraecum sp.	orchidaceae	valid	125	62	0.7	0.9	0.9	0.7		false	0	vegetating	3	0	0		0		1	main trunk	Juvenile/Sapling	761 -762 et 764		vegetating	etrex-191/18	10	39	90acd22a-7673-4230-86c7-97c8ebeaeb12
202388912191	202388912191	2023	8	8	9	10	etrex	2023	8	8	9	12	191	1		Seed plant	zz		Angraecum sp.	orchidaceae	valid	126	128	1	1	0.8	0.8		false	0	vegetating	3	0	0		0		1	main trunk	Juvenile/Sapling	765- 766 et 767		vegetating	etrex-191/19	10	42	78a62f7a-7f72-4f94-b157-d446707606cf
202388111192	202388111192	2023	8	8	9	10	etrex	2023	8	8	11	1	192	1		Seed plant	zz		Angraecum sp.	orchidaceae	valid	1.3	126	0.9	0.8	0.8	0.7		true	0	vegetating	2	0	0		0		2	crown	Juvenile/Sapling	768 - 771		vegetating	etrex-192/1	11	9	4a42e274-557c-4825-a940-fedb7607a297
202388111192	202388111192	2023	8	8	9	10	etrex	2023	8	8	11	1	192	1		Seed plant	zz		Angraecum sp.	orchidaceae	valid	1.34	128	1.1	0.5	1	1		true	0	vegetating	3	0	0		0		2	crown	Juvenile/Sapling	772 - 775	Leaf cut	vegetating	etrex-192/2	11	18	fcf66a1b-a742-4508-a095-f8f866e2384e
202388111192	202388111192	2023	8	8	9	10	etrex	2023	8	8	11	1	192	1		Seed plant	zz		Angraecum sp.	orchidaceae	valid	1.54	128	0.9	0.4	1.2	1.2		false	0	vegetating	2	0	0		0		2	crown	Juvenile/Sapling	776 - 180		vegetating	etrex-192/3	11	23	0cd86865-ada1-4e32-a350-a1a309b200eb
202388111192	202388111192	2023	8	8	9	10	etrex	2023	8	8	11	1	192	1		Seed plant	zz		Angraecum sp.	orchidaceae	valid	1.66	128	0.3	0.3	1	0		false	0	vegetating	0	0	0		0		2	crown	Juvenile/Sapling	781 - 785		vegetating	etrex-192/4	11	27	912c5ee8-a083-43e8-968b-c7112f6fe2b8
202388111192	202388111192	2023	8	8	9	10	etrex	2023	8	8	11	1	192	1		Seed plant	zz		Angraecum sp.	orchidaceae	valid	1.795	128	4.2	3	3	3.4		false	0	vegetating	4	0	0		0		2	crown	Juvenile/Sapling	786 - 789		vegetating	etrex-192/5	11	30	2cf944a3-1cf7-441f-a8d3-4aa332058eba
202388111192	202388111192	2023	8	8	9	10	etrex	2023	8	8	11	1	192	1		Seed plant	zz		Angraecum sp.	orchidaceae	valid	2	128	2	1.9	4.7	2.3		false	0	vegetating	4	0	0		0		2	crown	Juvenile/Sapling	790 - 793		vegetating	etrex-192/6	11	34	b61f4229-0018-4b85-9865-df2451557e91
202388114490	202388114490	2023	8	8	9	10	etrex	2023	8	8	11	44	90	1		Seed plant	zz		Angraecum sp.	orchidaceae	valid	0.73	128	1	2	1.2	3.5		false	0	vegetating	5	0	0		0		1	main trunk	Juvenile/Sapling	794 - 797		vegetating	etrex-90/1	11	48	cfaa0d19-5836-4e9d-8832-24a805139805
202388114490	202388114490	2023	8	8	9	10	etrex	2023	8	8	11	44	90	1		Seed plant	zz		Angraecum sp.	orchidaceae	valid	1.17	184	3	5	4.8	4.5		false	0	vegetating	7	0	0		0		1	main trunk	Subadult	798 - 804		vegetating	etrex-90/2	11	53	e1e59139-9e56-43ca-88b5-136b9ca8309b
202388114490	202388114490	2023	8	8	9	10	etrex	2023	8	8	11	44	90	1		Seed plant	zz		Angraecum sp.	orchidaceae	valid	1.52	140	1.5	2.6	1.6	2		true	0	vegetating	3	0	0		0		1	main trunk	Juvenile/Sapling	805 - 809		vegetating	etrex-90/3	11	58	1e97023e-25d5-4071-aa73-c51257831968
2023881237194	2023881237194	2023	8	8	9	10	etrex	2023	8	8	12	37	194	1		Fern	zz		Microsorum punctatum	Polypodiaceae	valid	0.18	292	10	4	8	6.2		false	0	vegetating	5	0	0		0		1	main trunk	Adult	810 - 814		vegetating	etrex-194/1	12	45	dc82fcd0-d648-400c-8e13-c6ffc96da962
2023881237194	2023881237194	2023	8	8	9	10	etrex	2023	8	8	12	37	194	1		Fern	zz		Microsorum punctatum	Polypodiaceae	valid	1.15	342	2.5	3.5	2	2.3		false	0	vegetating	3	0	0		0		1	main trunk	Juvenile/Sapling	815 - 818		vegetating	etrex-194/2	12	50	5f86419b-173d-427e-8e55-a01e2c99acfc
2023881237194	2023881237194	2023	8	8	9	10	etrex	2023	8	8	12	37	194	2		Fern	zz		Microsorum scolopendria	Polypodiaceae	valid	1.3	300	1.75			16		false	0	vegetating	10	0	0		0		1	main trunk	Adult	819 - 823	Includes main fern with small broken pieces nearby	vegetating	etrex-194/3	12	54	6980de52-a399-4a84-b0cf-578874f546fd
2023881237194	2023881237194	2023	8	8	9	10	etrex	2023	8	8	12	37	194	1		Seed plant	zz		Microsorum punctatum	Polypodiaceae	valid	1.78	4	4	3.8	3.5	4.9		false	0	vegetating	2	0	0		0		1	main trunk	Subadult	826 - 828		vegetating	etrex-194/4	13	9	6fe7a732-b930-42de-942a-702927af41c6
202381194013	202381194013	2023	8	11	9	20	65s	2023	8	11	9	40	13	1		Seed plant	zz		Angraecum sp.	orchidaceae	valid	1.52	248	1.82	1.3	1.3	1.4		false	0	vegetating	3	0	0				1	main trunk	Juvenile/Sapling	829 - 831	Width 0,4 cm	vegetating	65s-13/1	9	44	9f0eefda-0352-4423-ad6e-c64d3be359a4
202381195814	202381195814	2023	8	11	9	20	65s	2023	8	11	9	58	14	1		Seed plant	MUS_385		Angraecum sp.	orchidaceae	valid	1.78	320	2.9	1.7	1.9	1.1		false	0	vegetating	5	0	0				1	main trunk	Subadult	832 - 836	Width: 0,6 cm	vegetating	65s-14/1	10	6	0425ba5c-72cf-4a86-b326-20eb2e5179d4
202381195814	202381195814	2023	8	11	9	20	65s	2023	8	11	9	58	14	1		Seed plant	MUS_385		Angraecum sp.	orchidaceae	valid	2.55	50				0		false	0	vegetating	5	0	0				1	main trunk	Juvenile/Sapling	837 - 840	Too high to measure length	vegetating	65s-14/2	10	12	d7dd6244-58b5-4158-a582-86cfcfeb8f80
202381195814	202381195814	2023	8	11	9	20	65s	2023	8	11	9	58	14	1		Seed plant	MUS_385		Angraecum sp.	orchidaceae	valid	2.4	276				0		false	0	vegetating	5	0	0				1	main trunk	Juvenile/Sapling	841 - 843	Too high to measure	vegetating	65s-14/3	10	17	c74d9326-0a67-4c96-b428-9676c00c04bc
2023811105418	2023811105418	2023	8	11	9	20	65s	2023	8	11	10	54	18	1		Seed plant	MUS_385		Angraecum sp.	orchidaceae	valid	2.03	238	0.9	4.3	4.5	3.6		false	0	vegetating	4	0	0				1	main trunk	Juvenile/Sapling	844 - 849	Width: 1,2 cm	vegetating	65s-18/1	11	14	9c0a44ae-9035-4d21-b5b5-6660d23d1091
2023811105418	2023811105418	2023	8	11	9	20	65s	2023	8	11	10	54	18	1		Seed plant	MUS_385		Angraecum sp.	orchidaceae	valid	2.03	238	0.6	2.6	2.6	2.3		false	0	vegetating	3	0	0				1	main trunk	Juvenile/Sapling	850 - 853	Width: 0,6 cm	vegetating	65s-18/2	11	21	453112c4-e482-4ce0-82bb-ed3e33fb90fe
2023811105418	2023811105418	2023	8	11	9	20	65s	2023	8	11	10	54	18	1		Seed plant	MUS_400		Angraecum sp.	orchidaceae	valid	2.1	198	4	6.8	6.5	5.9		false	0	vegetating	7	0	0				1	main trunk	Juvenile/Sapling	854 - 860	Width: 1,3 cm	vegetating	65s-18/3	11	24	d285da4b-79cb-438a-9d99-1216403af3fb
2023811105418	2023811105418	2023	8	11	9	20	65s	2023	8	11	10	54	18	1		Seed plant	MUS_400		Angraecum sp.	orchidaceae	valid	2.01	286	0.8	0.9	0.7	0.7		false	0	vegetating	3	0	0				1	main trunk	Juvenile/Sapling	861 - 864	Width: 0,3 cm	vegetating	65s-18/4	11	29	9c685e82-44c9-4851-ac54-e2a80a9e23c3
2023811105418	2023811105418	2023	8	11	9	20	65s	2023	8	11	10	54	18	1		Seed plant	MUS_400		Angraecum sp.	orchidaceae	valid	2.01	288	1.5	2.2	2.2	2.3		false	0	vegetating	3	0	0				1	main trunk	Juvenile/Sapling	865 - 868	Width: 0.5 cm	vegetating	65s-18/5	11	34	644c8e37-367b-4840-83d6-98824068bdbc
2023811105418	2023811105418	2023	8	11	9	20	65s	2023	8	11	10	54	18	1		Seed plant	MUS_400		Angraecum sp.	orchidaceae	valid	2.03	286	1.4	2.9	1.4	2		false	0	vegetating	3	0	0				1	main trunk	Juvenile/Sapling	869 - 874	Width: 0,5	vegetating	65s-18/6	11	38	79894c0d-7ce7-4331-91a7-7b643d507835
2023811105418	2023811105418	2023	8	11	9	20	65s	2023	8	11	10	54	18	1		Seed plant	MUS_400		Angraecum sp.	orchidaceae	valid	2.04	288	0.9	1.8	1.3	1.2		false	0	vegetating	4	0	0				1	main trunk	Juvenile/Sapling	875 - 878	Width: 0,4 cm	vegetating	65s-18/7	11	42	1c038480-49cf-42cc-9b01-756318b89fbe
2023811105418	2023811105418	2023	8	11	9	20	65s	2023	8	11	10	54	18	1		Seed plant	MUS_400		Angraecum sp.	orchidaceae	valid	2.05	316	1.3	1.1	1	1.1		false	0	vegetating	2	0	0				1	main trunk	Juvenile/Sapling	879 - 883	Width: 0,3 cm	vegetating	65s-18/8	11	46	67e59e77-15a3-4a88-b6ee-7f9558725a2d
2023811105418	2023811105418	2023	8	11	9	20	65s	2023	8	11	10	54	18	1		Seed plant	MUS_400		Angraecum sp.	orchidaceae	valid	2.05	324	2	2.9	1.2	1.9		false	0	vegetating	4	0	0				1	main trunk	Juvenile/Sapling	884 - 889	Width: 0,4 cm	vegetating	65s-18/9	11	51	d3cd66bc-411d-41fd-b541-c3afd78ac149
2023811105418	2023811105418	2023	8	11	9	20	65s	2023	8	11	10	54	18	1		Seed plant	MUS_400		Angraecum sp.	orchidaceae	valid	2.05	258	0.6	1.1	1.1	0.8		false	0	vegetating	3	0	0				1	main trunk	Juvenile/Sapling	890 - 892	Width: 0,3 cm	vegetating	65s-18/10	11	55	1cf019c6-dd5d-4518-b35d-cd0a96e45375
2023811105418	2023811105418	2023	8	11	9	20	65s	2023	8	11	10	54	18	1		Seed plant	MUS_400		Angraecum sp.	orchidaceae	valid	2.05	258	1.6	3.3	3.3	2.7		false	0	vegetating	5	0	0				1	main trunk	Juvenile/Sapling	893 - 898	Width: 0,7 cm	vegetating	65s-18/11	11	59	8aebfde1-8cd0-45bd-bfde-0f3a47ff5289
2023811105418	2023811105418	2023	8	11	9	20	65s	2023	8	11	10	54	18	1		Seed plant	MUS_400		Angraecum sp.	orchidaceae	valid	2.07	258	1.4	3	3.3	2.1		false	0	vegetating	5	0	0				1	main trunk	Juvenile/Sapling	899 - 902	Width: 0,6 cm	vegetating	65s-18/12	12	2	74d57eb3-c078-4ba5-b4b6-7bca0de5d139
2023811105418	2023811105418	2023	8	11	9	20	65s	2023	8	11	10	54	18	1		Seed plant	MUS_400		Angraecum sp.	orchidaceae	valid	2.07	258	1.5	3	3.1	2.4		false	0	vegetating	5	0	0				1	main trunk	Juvenile/Sapling	903 - 907	Width: 0,6 cm	vegetating	65s-18/13	12	6	c8000435-fc37-442d-9586-fdefecc7cc5b
2023811105418	2023811105418	2023	8	11	9	20	65s	2023	8	11	10	54	18	1		Seed plant	MUS_400		Angraecum sp.	orchidaceae	valid	2.07	258	1	1.4	1.4	1.1		false	0	vegetating	4	0	0				1	main trunk	Juvenile/Sapling	908 - 910	Width: 0,3 cm	vegetating	65s-18/14	12	10	bad1b7ec-418d-46ea-a07b-38a2c5a94621
2023811105418	2023811105418	2023	8	11	9	20	65s	2023	8	11	10	54	18	1		Seed plant	MUS_400		Angraecum sp.	orchidaceae	valid	2.08	258	0.8	1.4	1.3	1		false	0	vegetating	4	0	0				1	main trunk	Juvenile/Sapling	911 - 914	Width: 0,3 cm	vegetating	65s-18/15	12	13	d0bea638-3d4f-4d28-9166-73c6b2f6444c
2023811105418	2023811105418	2023	8	11	9	20	65s	2023	8	11	10	54	18	1		Seed plant	MUS_400		Angraecum sp.	orchidaceae	valid	2.1	258	0.8	0.7	1.4	1.2		false	0	vegetating	5	0	0				1	main trunk	Juvenile/Sapling	915 - 919	Width: 0,3 cm	vegetating	65s-18/16	12	16	816192d7-bb47-440a-8040-3e6c42e65142
2023811105418	2023811105418	2023	8	11	9	20	65s	2023	8	11	10	54	18	1		Seed plant	MUS_400		Angraecum sp.	orchidaceae	valid	2.11	258	1	2.9	2.3	2.2		false	0	vegetating	4	0	0				1	main trunk	Juvenile/Sapling	920 - 923	Width: 0,8 cm	vegetating	65s-18/17	12	20	74f16bfa-d4ae-4c35-ac59-0230e72fadaf
2023811105418	2023811105418	2023	8	11	9	20	65s	2023	8	11	10	54	18	1		Seed plant	MUS_400		Angraecum sp.	orchidaceae	valid	2.06	286	1.5	3.4	3.1	2.8		false	0	vegetating	5	0	0				1	main trunk	Juvenile/Sapling	924 - 928	Width: 0,7 cm	vegetating	65s-18/18	12	23	227a166c-be59-4b42-a2f5-dbfa6da9384e
2023811105418	2023811105418	2023	8	11	9	20	65s	2023	8	11	10	54	18	1		Seed plant	MUS_379		Angraecum sp.	orchidaceae	valid	2.06	286	1.4	2.5	2.2	2.1		false	0	vegetating	5	0	0				1	main trunk	Juvenile/Sapling	929 - 932	Width: 0,5 cm	vegetating	65s-18/19	12	27	36fa99b3-066e-4e46-8598-272061c7235d
2023811105418	2023811105418	2023	8	11	9	20	65s	2023	8	11	10	54	18	1		Seed plant	MUS_400		Angraecum sp.	orchidaceae	valid	2.07	312	2.4	3.1	3.1	2.9		false	0	vegetating	5	0	0				1	main trunk	Juvenile/Sapling	933 - 937	Width: 0,6 cm	vegetating	65s-18/20	12	31	116ce9d4-4efb-4cfd-9e79-e53c6dfde2ad
2023811105418	2023811105418	2023	8	11	9	20	65s	2023	8	11	10	54	18	1		Seed plant	MUS_400		Angraecum sp.	orchidaceae	valid	2.08	306	3.3	3.2	3.2	3.1		false	0	vegetating	4	0	0				1	main trunk	Juvenile/Sapling	939 - 941	Width: 0,8 cm	vegetating	65s-18/21	12	36	2d761cbc-2064-4034-9ab9-9729c6c444d0
2023811105418	2023811105418	2023	8	11	9	20	65s	2023	8	11	10	54	18	1		Seed plant	MUS_400		Angraecum sp.	orchidaceae	valid	1.3	310	2.1	4.2	4.2	3.3		false	0	vegetating	3	0	0				1	main trunk	Juvenile/Sapling	942 - 945	Width: 0,8 cm	vegetating	65s-18/22	13	5	dc61873b-cb05-49f3-a154-dab34cb41f2e
2023811105418	2023811105418	2023	8	11	9	20	65s	2023	8	11	10	54	18	1		Seed plant	MUS_400		Angraecum sp.	orchidaceae	valid	2.15	310	0.9	2.7	1.4	1.5		false	0	vegetating	5	0	0				1	main trunk	Juvenile/Sapling	946 - 950	Width: 0,4 cm	vegetating	65s-18/23	13	8	002ed176-12b9-4f15-86e2-a44428ac2639
2023811105418	2023811105418	2023	8	11	9	20	65s	2023	8	11	10	54	18	1		Seed plant	MUS_400		Angraecum sp.	orchidaceae	valid	2.17	286	2.4	4.8	4.2	3.4		false	0	vegetating	5	0	0				1	main trunk	Juvenile/Sapling	951 - 955	Width: 0,7 cm	vegetating	65s-18/24	13	11	d257fcc3-03d5-4111-9c00-5e286075d879
2023811105418	2023811105418	2023	8	11	9	20	65s	2023	8	11	10	54	18	1		Seed plant	MUS_400		Angraecum sp.	orchidaceae	valid	2.17	310	0.7	1.9	1.7	0.9		false	0	vegetating	5	0	0				1	main trunk	Juvenile/Sapling	955 - 958	Width: 0,4 cm	vegetating	65s-18/25	13	14	3481f04b-3736-4ce4-9964-2d652f959f0d
2023811105418	2023811105418	2023	8	11	9	20	65s	2023	8	11	10	54	18	1		Seed plant	MUS_400		Angraecum sp.	orchidaceae	valid	2.18	248	1.2	2.6	2	1.5		false	0	vegetating	4	0	0				1	main trunk	Juvenile/Sapling	959 - 961	Width: 0,5 cm	vegetating	65s-18/26	13	17	333b0890-4fd7-4dda-bd64-6d100f41e985
2023811105418	2023811105418	2023	8	11	9	20	65s	2023	8	11	10	54	18	1		Seed plant	MUS_400		Angraecum sp.	orchidaceae	valid	2.13	324	3.1	2.6	4.7	4.1		false	0	vegetating	3	0	0				1	main trunk	Juvenile/Sapling	962 - 965	Width: 0,8 cm	vegetating	65s-18/27	13	20	7eefd075-80fb-4f41-8a02-c9f58e243831
2023811105418	2023811105418	2023	8	11	9	20	65s	2023	8	11	10	54	18	1		Seed plant	MUS_400		Angraecum sp.	orchidaceae	valid	2.15	324	2.4	7.2	4.2	4.6		false	0	vegetating	4	0	0				1	main trunk	Juvenile/Sapling	966 - 969	Width: 0,8 cm	vegetating	65s-18/28	13	24	93c087f7-c0ee-4550-8e64-f475a85a547e
2023811105418	2023811105418	2023	8	11	9	20	65s	2023	8	11	10	54	18	1		Seed plant	MUS_400		Angraecum sp.	orchidaceae	valid	2.24	276	2.1	4	3.3	2.5		false	0	vegetating	5	0	0				1	main trunk	Juvenile/Sapling	970 - 973	Width: 0,7 cm	vegetating	65s-18/29	13	28	f2e98bcf-3e98-4c03-9a21-481acfa2438e
2023811105418	2023811105418	2023	8	11	9	20	65s	2023	8	11	10	54	18	1		Seed plant	MUS_400		Angraecum sp.	orchidaceae	valid	2.26	276	1.2	2.7	2.2	1.7		false	0	vegetating	4	0	0				1	main trunk	Juvenile/Sapling	974 - 977	Width: 0,5 cm	vegetating	65s-18/30	13	30	349e8df0-340d-47a2-bdaf-1bcfff172c1d
2023811105418	2023811105418	2023	8	11	9	20	65s	2023	8	11	10	54	18	1		Seed plant	MUS_400		Angraecum sp.	orchidaceae	valid	2.36	230	5.1	7.9	7.7	6.8		false	4	ripe fruit	4	0	4				1	main trunk	Adult	978 - 983	Width: 1,4 cm	fruiting	65s-18/31	13	32	cf5997cc-8589-4e82-ab3a-223b8d90dcce
2023811105418	2023811105418	2023	8	11	9	20	65s	2023	8	11	10	54	18	1		Seed plant	MUS_400		Angraecum sp.	orchidaceae	valid	2.51	218				0		false	0	vegetating	2	0	0				1	main trunk	Juvenile/Sapling	984		vegetating	65s-18/32	13	38	4a7e2d8f-a087-4fba-b271-b81f3638197c
2023811105418	2023811105418	2023	8	11	9	20	65s	2023	8	11	10	54	18	1		Seed plant	MUS_400		Angraecum sp.	orchidaceae	valid	2.51	256				0		false	0	vegetating	4	0	0				1	main trunk	Juvenile/Sapling	985		vegetating	65s-18/33	13	40	8d9a39ec-b0a5-4492-9942-f667d6634da9
2023811105418	2023811105418	2023	8	11	9	20	65s	2023	8	11	10	54	18	1		Seed plant	MUS_400		Angraecum sp.	orchidaceae	valid	2.51	256				0				vegetating	4	0	0				1	main trunk	Juvenile/Sapling	986			65s-18/34	13	41	05988d97-0cd7-4429-8f08-ecece49ab4b3
2023811141423	2023811141423	2023	8	11	9	20	65s	2023	8	11	14	14	23	2		Fern	FERN_173		Microsorum punctatum	Polypodiaceae	valid	0	128	13	13.5	16.5	0		false	0	vegetating	5	0	0	17.5			1	main trunk	Adult	989 - 991	Width: 3,2 cm	vegetating	65s-23/1	14	18	446d37f7-3f39-403a-a0ac-d6189ebdd1d6
2023811141423	2023811141423	2023	8	11	9	20	65s	2023	8	11	14	14	23	1		Seed plant	MUS_400		Polystachia mauritiana s.l.	orchidaceae	valid	1.2	220	1.9	1.1	1.1	1.3		false	0	vegetating	1	0	0				1	main trunk	Juvenile/Sapling	992 - 996	Width: 0,6 cm	vegetating	65s-23/2	14	23	f0b898ff-69ae-45a5-af2c-80b581e75dec
2023811143124	2023811143124	2023	8	11	9	20	65s	2023	8	11	14	31	24	2		Fern	zz		Microsorum punctatum	Polypodiaceae	seedling	0.81	282	0.4	0.5	0.5	0		false	0	vegetating	3	0	0	0.5			1	main trunk	Born/Seedling	997 - 999	Width: 0,2 cm	vegetating	65s-24/1	14	42	39dda58e-ecff-4831-a430-cd784bb8e22a
2023811143124	2023811143124	2023	8	11	9	20	65s	2023	8	11	14	31	24	2		Fern	zz		Microsorum punctatum	Polypodiaceae	seedling	0.38	6	0.3	2.4	1.7	0		false	0	vegetating	5	0	0	1.8			1	main trunk	Juvenile/Sapling	101003-006	Width: 0,6 cm	vegetating	65s-24/2	14	48	d91e12da-acaf-47a9-90c3-5a9f2ef07f0c
2023811143124	2023811143124	2023	8	11	9	20	65s	2023	8	11	14	31	24	2		Fern	zz		Microsorum punctatum	Polypodiaceae	seedling	0.2	280	0.2	2.9	1	0		false	0	vegetating	4	0	0	2			1	main trunk	Juvenile/Sapling	101007-009	Width: 0,6 cm	vegetating	65s-24/3	14	52	ca943ef1-90d9-4a46-8ae6-1f6297debc3c
2023811143124	2023811143124	2023	8	11	9	20	65s	2023	8	11	14	31	24	2		Fern	zz		Microsorum punctatum	Polypodiaceae	seedling	0.22	348	0.3	0.2	0.2	0		false	0	vegetating	1	0	0	0.3			1	main trunk	Born/Seedling	101010-013	Width: 0,2 cm	vegetating	65s-24/4	14	55	ac2d75ed-4be3-46e2-8c94-d36eaab5622a
2023811143124	2023811143124	2023	8	11	9	20	65s	2023	8	11	14	31	24	2		Fern	FERN_173		Microsorum punctatum	Polypodiaceae	seedling	0.26	230	0.6	0.8	0.8	0		false	0	vegetating	2	0	0	0.7			1	main trunk	Born/Seedling	101014-016	Width: 0,3 cm	vegetating	65s-24/5	15	1	1afdc4cc-1c17-4b46-a88f-e65ddb276ddf
2023811143124	2023811143124	2023	8	11	9	20	65s	2023	8	11	14	31	24	2		Fern	FERN_173		Microsorum punctatum	Polypodiaceae	seedling	0.19	232	0.7	0.5	0.4	0		false	0	vegetating	1	0	0	0.5			1	main trunk	Juvenile/Sapling	101017-019	Width: 0,3 cm	vegetating	65s-24/6	15	3	322a08d0-8a4a-453e-8d93-fb949ed2fee6
20238159258	20238159258	2023	8	15	9	23	65s	2023	8	15	9	25	8	2		Fern	zz		Microsorum punctatum	Polypodiaceae	seedling	0.07	90	1.4	0.5	1.7	0		false	0	vegetating	1	0	0	1.7	0	0	1	main trunk	Juvenile/Sapling	178-181	Width 0,3	vegetating	65s-8/1	9	39	6f6c6cba-acf9-4ef2-95ea-68d99280fdf6
20238159258	20238159258	2023	8	15	9	23	65s	2023	8	15	9	25	8	2		Fern	zz		Microsorum punctatum	Polypodiaceae	seedling	0.15	70				1.9		false	0	vegetating	2	0	0	1.9	0		1	main trunk	Juvenile/Sapling	182-186	Width 0,7	vegetating	65s-8/2	9	47	36a903ef-6262-46cd-98bc-0fe511b718a8
20238159258	20238159258	2023	8	15	9	23	65s	2023	8	15	9	25	8	2		Fern	zz		Microsorum punctatum	Polypodiaceae	seedling	0.18	72				0		false	0	vegetating	3	0	0	0.9	0		1	main trunk	Juvenile/Sapling	187-191	Width 0,4	vegetating	65s-8/3	9	52	8b97f290-5391-47ef-b2aa-876342d73361
20238159258	20238159258	2023	8	15	9	23	65s	2023	8	15	9	25	8	2		Fern	zz		Microsorum punctatum	Polypodiaceae	seedling	0.17	46				0		false	0	vegetating	2	0	0	1.9	0		1	main trunk	Juvenile/Sapling	192-193	Width 0,6	vegetating	65s-8/4	9	55	ff8a0bbf-0de6-4630-8bc1-3404250e5d3b
20238159258	20238159258	2023	8	15	9	23	65s	2023	8	15	9	25	8	2		Fern	zz		Microsorum scolopendria	Polypodiaceae	seedling	0.16	22	2.2	2.7	0.9	0		false	0	vegetating	2	0	0	2.6	0		1	main trunk	Juvenile/Sapling	194-198	Width 0,7	vegetating	65s-8/5	9	57	c1672348-7927-4ace-9cc4-f429c1956a0d
20238159258	20238159258	2023	8	15	9	23	65s	2023	8	15	9	25	8	2		Fern	zz		Microsorum punctatum	Polypodiaceae	seedling	0.3	108	1	1.2	1.1	0		false	0	vegetating	2	0	0	0.7	0		1	main trunk	Juvenile/Sapling	199-202	Width 0,4	vegetating	65s-8/6	10	2	c3804424-fa84-4cbf-8512-d23fe14bc0f1
20238159258	20238159258	2023	8	15	9	23	65s	2023	8	15	9	25	8	2		Fern	zz		Microsorum punctatum	Polypodiaceae	seedling	0.3	190	0.3	0.3	0.5	0		false	0	vegetating	1	0	0	0.5	0		1	main trunk	Juvenile/Sapling	203-207	Width 0,2	vegetating	65s-8/7	10	5	c4c8c986-c9b9-4697-bace-96a8ba69f2fc
20238159258	20238159258	2023	8	15	9	23	65s	2023	8	15	9	25	8	2		Fern	zz		Microsorum punctatum	Polypodiaceae	seedling	0.34	96				0		false	0	vegetating	2	0	0	0.9	0		1	main trunk	Juvenile/Sapling	208-216	Width 0,5	vegetating	65s-8/8	10	10	e1479baf-d13a-4fbb-8418-7f369084a5cf
20238159258	20238159258	2023	8	15	9	23	65s	2023	8	15	9	25	8	2		Fern	zz		Microsorum punctatum	Polypodiaceae	seedling	0.9	60	0.6	1.2	0.6	0		false	0	vegetating	2	0	0	1	0		1	main trunk	Juvenile/Sapling	217-222	Width 0,5	vegetating	65s-8/9	10	13	1a38edb6-e55a-4d68-b795-cf034ee09f53
20238159258	20238159258	2023	8	15	9	23	65s	2023	8	15	9	25	8	2		Fern	zz		Microsorum punctatum	Polypodiaceae	seedling	0.95	164	0.3	0.5	0.4	0		false	0	vegetating	2	0	0	0.4	0		1	main trunk	Juvenile/Sapling	223-227	Width 0,3	vegetating	65s-8/10	10	16	3a7b126e-873e-4475-b040-d0bbf52d7a02
20238159258	20238159258	2023	8	15	9	23	65s	2023	8	15	9	25	8	2		Fern	zz		Microsorum punctatum	Polypodiaceae	seedling	1.05	74	0.2	0.3	0.4	0		false	0	vegetating	1	0	0	0.5	0		1	main trunk	Juvenile/Sapling	228-231	Width 0,2	vegetating	65s-8/11	10	20	90f67fdf-370c-480d-a185-744157612cf9
20238159258	20238159258	2023	8	15	9	23	65s	2023	8	15	9	25	8	2		Fern	FERN_173		Microsorum punctatum	Polypodiaceae	valid	1.18	130	1.9	4	1.7	0		false	0	vegetating	2	0	0	3	0	0.3	1	main trunk	Subadult	232-235	Width 1,2	vegetating	65s-8/12	10	23	49feed4a-5100-45d3-aedf-058df0054526
20238159258	20238159258	2023	8	15	9	23	65s	2023	8	15	9	25	8	2		Fern	zz		Microsorum punctatum	Polypodiaceae	valid	1.75	48	2.3	1.8	3.9	0		false	0	vegetating	1	0	0	4.2	0	0.3	1	main trunk	Subadult	236-238	Width 0,7	vegetating	65s-8/13	10	27	f6df36d6-2857-4b6a-819a-ec1cb7b69c85
20238159258	20238159258	2023	8	15	9	23	65s	2023	8	15	9	25	8	2		Fern	zz		Microsorum punctatum	Polypodiaceae	valid	1.74	126	1.7	0.9	2	0		false	0	vegetating	1	0	0	2.7	0	0.1	1	main trunk	Subadult	239-241	Width 0,7	vegetating	65s-8/14	10	30	019b0d7e-2da5-401c-939f-2a8f14e43e0d
20238159258	20238159258	2023	8	15	9	23	65s	2023	8	15	9	25	8	2		Fern	zz		Microsorum punctatum	Polypodiaceae	valid	1.75	152	0.6	2.4	1.5	0		false	0	vegetating	3	0	0	1.9	0	0.2	1	main trunk	Juvenile/Sapling	242-245	Width 0,6	vegetating	65s-8/15	10	33	5c888fa7-4815-469a-a27c-b60cfe87aac2
20238159258	20238159258	2023	8	15	9	23	65s	2023	8	15	9	25	8	2		Fern	FERN_173		Microsorum punctatum	Polypodiaceae	valid	1.78	126	8.3	9.5	12.6	0		false	0	vegetating	5	0	0	13	0	0.4	1	main trunk	Adult	246-250	Width 2,6	vegetating	65s-8/16	10	36	a66ee9ba-c7a9-416a-ac12-1bfb1d046514
20238159258	20238159258	2023	8	15	9	23	65s	2023	8	15	9	25	8	2		Fern	zz		Microsorum punctatum	Polypodiaceae	valid	2.1	26				0		false	0	vegetating	4	0	0		0		1	main trunk	Subadult	251-252		vegetating	65s-8/17	10	41	18216f3a-4e93-477e-a987-afbc06d7a859
20238159258	20238159258	2023	8	15	9	23	65s	2023	8	15	9	25	8	1		Seed plant	zz		Polystachia mauritiana s.l.	orchidaceae	valid	2.25	236				0		false	0	vegetating	4	0	0				1	main trunk	Subadult	253-258		vegetating	65s-8/18	10	44	11af6c96-c801-4a8b-9f83-e53cb19e056a
20238159258	20238159258	2023	8	15	9	23	65s	2023	8	15	9	25	8	2		Fern	zz		Microsorum punctatum	Polypodiaceae	valid	2.6	174				0		false	0	vegetating	2	0	0		0		1	main trunk	Subadult	259-261/262		vegetating	65s-8/19	10	47	9610bf16-9841-4714-a826-0022b36203ac
20238159258	20238159258	2023	8	15	9	23	65s	2023	8	15	9	25	8	2		Fern	zz		Microsorum punctatum	Polypodiaceae	valid	2.62	162				0		false	0	vegetating	4	0	0		0		1	main trunk	Subadult	261/62-264/5		vegetating	65s-8/20	10	50	b0885a14-6701-43ce-9da3-9630e04f0c94
20238159258	20238159258	2023	8	15	9	23	65s	2023	8	15	9	25	8	2		Fern	zz		Microsorum punctatum	Polypodiaceae	valid	2.62	136				0		false	0	vegetating	4	0	0		0		1	main trunk	Subadult	openforis picture		vegetating	65s-8/21	10	53	7fcfe0bb-3a4b-4dd7-ad46-36711e6710d3
20238159258	20238159258	2023	8	15	9	23	65s	2023	8	15	9	25	8	2		Fern	zz		Microsorum punctatum	Polypodiaceae	valid	2.72	152				0		false	0	vegetating	2	0	0		0		1	main trunk	Subadult	openforis picture		vegetating	65s-8/22	10	56	7d540559-72e8-4d16-a213-a3c378eccdd8
20238159258	20238159258	2023	8	15	9	23	65s	2023	8	15	9	25	8	2		Fern	zz		Microsorum punctatum	Polypodiaceae	valid	2.75	38				0		false	0	vegetating	5	0	0		0		2	crown	Subadult	openforis picture		vegetating	65s-8/23	10	58	4964ae60-4118-40b1-946b-e794d586527d
20238159258	20238159258	2023	8	15	9	23	65s	2023	8	15	9	25	8	1		Seed plant	zz		Hederorkis scandens	orchidaceae	valid	3	134				0		false	0	vegetating	3	0	0				1	main trunk	Subadult	openforis picture		vegetating	65s-8/24	11	1	c2b90d1f-45fd-423d-9713-5e62bf7ccddc
20238159258	20238159258	2023	8	15	9	23	65s	2023	8	15	9	25	8	2		Fern	zz		Microsorum punctatum	Polypodiaceae	seedling	3.65	344				0		false	0	vegetating	2	0	0		0		1	main trunk	Juvenile/Sapling	openforis picture	Same picture for next fern num 26	vegetating	65s-8/25	11	7	024bff13-86d0-46ae-a4c0-fdb9516f8025
20238159258	20238159258	2023	8	15	9	23	65s	2023	8	15	9	25	8	2		Fern	zz		Microsorum punctatum	Polypodiaceae	seedling	3.8	110				0		false	0	vegetating	2	0	0		0		1	main trunk	Subadult	openforis picture	Look picture fern num 25	vegetating	65s-8/26	11	12	f6592f3c-907a-4dc9-95c5-122d2d485248
2023815112536	2023815112536	2023	8	15	9	23	65s	2023	8	15	11	25	36	2		Fern	zz		Microsorum punctatum	Polypodiaceae	seedling	0	190	1.1	1.9	0.8	0		false	0	vegetating	6	0	0	1.4	0		1	main trunk	Juvenile/Sapling	openforis picture	Width 0,3	vegetating	65s-36/1	11	35	f49476c0-9e4f-4fdd-9b69-666e054d63eb
2023815112536	2023815112536	2023	8	15	9	23	65s	2023	8	15	11	25	36	2		Fern	zz		Microsorum punctatum	Polypodiaceae	seedling	0	144	0.6	0.9	0.5	0		false	0	vegetating	4	0	0	0.6	0		1	main trunk	Juvenile/Sapling	openforis picture	Width 0,3	vegetating	65s-36/2	11	39	60080330-6d92-4c6f-856c-25376ada1c31
2023815112536	2023815112536	2023	8	15	9	23	65s	2023	8	15	11	25	36	2		Fern	zz		Microsorum punctatum	Polypodiaceae	seedling	0.04	242	0.2	0.3	0.3	0		false	0	vegetating	1	0	0	0.5	0		1	main trunk	Juvenile/Sapling	openforis picture	Width 0,3	vegetating	65s-36/3	11	40	52d4ea90-3e47-44b3-9b58-0125448dcc71
2023815112536	2023815112536	2023	8	15	9	23	65s	2023	8	15	11	25	36	2		Fern	zz		Microsorum punctatum	Polypodiaceae	seedling	0.08	206	0.7	0.5	0.5	0		false	0	vegetating	3	0	0	0.6	0		1	main trunk	Juvenile/Sapling	openforis picture	Width 0,2	vegetating	65s-36/4	11	40	0e82f536-404a-4db6-b65f-2c3e709a1f0b
2023815112536	2023815112536	2023	8	15	9	23	65s	2023	8	15	11	25	36	2		Fern	zz		Microsorum punctatum	Polypodiaceae	seedling	0.04	62	0.3	1	1	0		false	0	vegetating	2	0	0	1	0		1	main trunk	Juvenile/Sapling	openforis picture	Width 0,2	vegetating	65s-36/5	11	47	7745ae96-80c5-4e90-9434-254cf2300b3e
2023815112536	2023815112536	2023	8	15	9	23	65s	2023	8	15	11	25	36	2		Fern	zz		Microsorum scolopendria	Polypodiaceae	aff.	0.06	104	4.9	6.6	9.6	0		false	0	vegetating	7	0	0	9.5	0		1	main trunk	Adult	openforis picture	Width 1,8	vegetating	65s-36/6	11	48	09c9de62-7f4c-43a2-989a-a8c82ca6a2ea
2023815112536	2023815112536	2023	8	15	9	23	65s	2023	8	15	11	25	36	1		Seed plant	MUS_400		Angraecum sp.	orchidaceae	valid	1.1	202	1.4	4	2.9	0		false	0	vegetating	4	0	0	4.1			1	main trunk	Subadult	openforis picture	Width 0,8	vegetating	65s-36/7	11	53	21a0811b-da1d-4667-b948-75157c0734a6
2023815112536	2023815112536	2023	8	15	9	23	65s	2023	8	15	11	25	36	1		Seed plant	MUS_400		Angraecum sp.	orchidaceae	valid	1.13	206	1.8	3.5	1.8	0		false	0	vegetating	4	0	0	2.2			1	main trunk	Subadult	openforis picture	Width 0,6	vegetating	65s-36/8	11	54	2c33d3e6-0378-4461-a6ff-2c8729cac3b9
2023815112536	2023815112536	2023	8	15	9	23	65s	2023	8	15	11	25	36	1		Seed plant	MUS_400		Angraecum sp.	orchidaceae	valid	1.17	206	0.8	0.5	1	0		false	0	vegetating	3	0	0	1			1	main trunk	Juvenile/Sapling	openforis picture	Width 0,2	vegetating	65s-36/9	11	55	87f9cf84-125a-4f64-8c85-1143c53fc5e5
2023815112536	2023815112536	2023	8	15	9	23	65s	2023	8	15	11	25	36	1		Seed plant	MUS_400		Angraecum sp.	orchidaceae	valid	1.21	80	1.1	2.1	1.2	0		false	0	vegetating	3	0	0	1.7			1	main trunk	Juvenile/Sapling	openforis picture	Width 0,5	vegetating	65s-36/10	11	56	e50936f6-607e-47c8-89ed-f9c6609b9b91
2023815112536	2023815112536	2023	8	15	9	23	65s	2023	8	15	11	25	36	1		Seed plant	MUS_400		Angraecum sp.	orchidaceae	valid	1.22	44	0.6	0.9	0.7	0		false	0	vegetating	3	0	0	0.8			1	main trunk	Juvenile/Sapling	openforis picture	Width 0,2	vegetating	65s-36/11	11	57	28646a65-4a30-4662-ab72-56cfa13539cc
2023815112536	2023815112536	2023	8	15	9	23	65s	2023	8	15	11	25	36	1		Seed plant	MUS_400		Angraecum sp.	orchidaceae	valid	1.27	44	0.8	1.2	0.4	0		false	0	vegetating	3	0	0	0.7			1	main trunk	Juvenile/Sapling	openforis picture	Width 0,3	vegetating	65s-36/12	11	58	8e56b8e5-c299-481c-9790-39b9ccac04eb
2023815112536	2023815112536	2023	8	15	9	23	65s	2023	8	15	11	25	36	1		Seed plant	zz		Angraecum sp.	orchidaceae	valid	1.3	0	0.4	0.3	0.4	0		false	0	vegetating	1	0	0	0.4			1	main trunk	Juvenile/Sapling	openforis picture	Width 0,1	vegetating	65s-36/13	11	59	f79665fd-4b32-412f-8ff6-06eccb3362e4
2023815112536	2023815112536	2023	8	15	9	23	65s	2023	8	15	11	25	36	1		Seed plant	MUS_400		Angraecum sp.	orchidaceae	valid	1.4	76	0.4	0.7	0.4	0		false	0	vegetating	2	0	0	0.5			1	main trunk	Juvenile/Sapling	openforis picture	Width 0,3	vegetating	65s-36/14	12	0	700ffc3f-a8f1-4d7a-915b-405f79105b5f
2023815112536	2023815112536	2023	8	15	9	23	65s	2023	8	15	11	25	36	1		Seed plant	MUS_400		Angraecum sp.	orchidaceae	valid	1.89	76	1.3	3.1	3.1	0		false	0	vegetating	4	0	0	3			1	main trunk	Subadult	openforis picture	Width 0,8	vegetating	65s-36/15	12	14	164d48e5-a7bb-4178-ba0a-52341e4ec0aa
2023815112536	2023815112536	2023	8	15	9	23	65s	2023	8	15	11	25	36	1		Seed plant	MUS_400		Angraecum sp.	orchidaceae	valid	1.94	80	0.7	2.1	1.1	0		false	0	vegetating	3	0	0	1.5			1	main trunk	Juvenile/Sapling	openforis picture	Width 0,4	vegetating	65s-36/16	12	15	5bd42c7a-81d7-4b4e-be2c-65db2746e845
2023815112536	2023815112536	2023	8	15	9	23	65s	2023	8	15	11	25	36	1		Seed plant	MUS_400		Angraecum sp.	orchidaceae	valid	1.95	168	2.1	5.7	5.3	0		false	3	unripe fruit	2	0	2	5.7			1	main trunk	Adult	openforis picture	Width 1	fruiting	65s-36/17	12	15	79c4ca32-5326-43d3-b42e-58316c6677e6
2023815112536	2023815112536	2023	8	15	9	23	65s	2023	8	15	11	25	36	1		Seed plant	MUS_400		Angraecum sp.	orchidaceae	valid	2	24	2.2	3.9	3.1	0		false	0	vegetating	4	0	0	3.1			1	main trunk	Subadult	openforis picture	Width 1,1, data for epiphyte 19	vegetating	65s-36/19	12	17	0590de4a-b5cd-4860-841d-6ea037173288
2023815112536	2023815112536	2023	8	15	9	23	65s	2023	8	15	11	25	36	1		Seed plant	MUS_400		Angraecum sp.	orchidaceae	valid	2.02	348	2.5	3.5	2.4	0		false	0	vegetating	3	0	0	2.8			1	main trunk	Subadult	openforis picture	Width 0,6, data epiphyte 20	vegetating	65s-36/20	12	17	b534066f-c980-46b6-8a63-b4a19efdfd89
2023815112536	2023815112536	2023	8	15	9	23	65s	2023	8	15	11	25	36	1		Seed plant	MUS_400		Angraecum sp.	orchidaceae	valid	2.18	300				0		false	0	vegetating	2	0	0				1	main trunk	Juvenile/Sapling	openforis picture	Data epiphyte 21	vegetating	65s-36/21	12	18	9c82f5ae-6c36-4ebb-9ccf-4bef865972c5
2023815112536	2023815112536	2023	8	15	9	23	65s	2023	8	15	11	25	36	1		Seed plant	MUS_400		Angraecum sp.	orchidaceae	valid	2.4	20				0		false	0	vegetating	5	0	0				1	main trunk	Subadult	openforis picture	Data epiphyte 22	vegetating	65s-36/22	12	19	50fdaba3-bb83-4694-9769-da14c9d50b94
2023815112536	2023815112536	2023	8	15	9	23	65s	2023	8	15	11	25	36	1		Seed plant	MUS_400		Angraecum sp.	orchidaceae	valid	1.9	304	0.3	1.1	0.4	0		false	0	vegetating	2	0	0	1			1	main trunk	Juvenile/Sapling	openforis picture	Width 0,4, picture of 18	vegetating	65s-36/18	12	19	263efe41-0da7-4868-b834-c02b248e4100
2023815125637	2023815125637	2023	8	15	9	23	65s	2023	8	15	12	56	37	2		Fern	zz		Microsorum punctatum	Polypodiaceae	seedling	0.14	290	0.7	0.5	0.4	0		false	0	vegetating	3	0	0	0.4			1	main trunk	Juvenile/Sapling	openforis picture	Width 0,2	vegetating	65s-37/1	13	5	ac251502-8cd3-4e08-812e-1028434cf722
2023815131038	2023815131038	2023	8	15	9	23	65s	2023	8	15	13	10	38	2		Fern	zz		Microsorum punctatum	Polypodiaceae	seedling	0.14	136	0.3	1.1	0.7	0		false	0	vegetating	2	0	0	0.7	0		1	main trunk	Juvenile/Sapling	openforis picture	Width 0,4	vegetating	65s-38/1	13	17	97f6ef3f-528a-4c5d-aeda-5ac8f2317a40
2023815131038	2023815131038	2023	8	15	9	23	65s	2023	8	15	13	10	38	1		Seed plant	MUS_400		Angraecum sp.	orchidaceae	valid	1.95	228	1.5	1.8	1	0		false	0	vegetating	5	0	0	0.8			1	main trunk	Subadult	openforis picture	Width 0,3	vegetating	65s-38/2	13	20	dd520014-c314-45f3-82a8-1a5ede149009
2023815131038	2023815131038	2023	8	15	9	23	65s	2023	8	15	13	10	38	1		Seed plant	MUS_400		Angraecum sp.	orchidaceae	valid	2.18	210				0		false	0	vegetating	4	0	0				1	main trunk	Subadult	openforis picture		vegetating	65s-38/3	13	21	935bc050-429b-4b6f-bded-7e4a6d0fadb4
2023815131038	2023815131038	2023	8	15	9	23	65s	2023	8	15	13	10	38	1		Seed plant	MUS_400		Angraecum sp.	orchidaceae	valid	2.7	298				0		false	0	vegetating	4	0	0				1	main trunk	Juvenile/Sapling	openforis picture		vegetating	65s-38/4	13	23	653c811f-1ad4-45df-a474-2997d6484cfa
2023815131038	2023815131038	2023	8	15	9	23	65s	2023	8	15	13	10	38	2		Fern	zz		Microsorum punctatum	Polypodiaceae	seedling	0.1	226	1.4	1	1	0		false	0	vegetating	3	0	0	1.2	0		1	main trunk	Juvenile/Sapling	openforis picture	Width 0,3	vegetating	65s-38/5	13	24	e0827c65-3834-4245-8e6c-45a28781e7c6
2023815133338	2023815133338	2023	8	15	9	23	65s	2023	8	15	13	33	38	2		Fern	zz		Microsorum punctatum	Polypodiaceae	seedling	0.42	352	2.4	1.4	1.5	0		false	0	vegetating	5	0	0	1.7	0		1	main trunk	Juvenile/Sapling	openforis picture	Width 0,4	vegetating	65s-38/1	13	41	7f7a58b3-489d-40aa-a871-330714ba8dae
2023815133338	2023815133338	2023	8	15	9	23	65s	2023	8	15	13	33	38	2		Fern	zz		Microsorum punctatum	Polypodiaceae	seedling	0.34	294	0.8	0.8	0.8	0		false	0	vegetating	4	0	0	0.6	0		1	main trunk	Juvenile/Sapling	openforis picture	Width 0,2	vegetating	65s-38/2	13	42	d23e9ada-ed07-48b8-857a-1a5463303cf0
2023815133338	2023815133338	2023	8	15	9	23	65s	2023	8	15	13	33	38	2		Fern	zz		Microsorum punctatum	Polypodiaceae	seedling	0	242	1.8	1.1	1.5	0		false	0	vegetating	3	0	0	2	0		1	main trunk	Juvenile/Sapling	openforis picture	Width 0,4	vegetating	65s-38/3	13	47	a2916d35-b1ec-4569-8e8d-60229ab82d24
2023815133338	2023815133338	2023	8	15	9	23	65s	2023	8	15	13	33	38	2		Fern	zz		Microsorum punctatum	Polypodiaceae	seedling	0.02	26	1.9	4.1	2.1	0		false	0	vegetating	4	0	0	2.9	0		1	main trunk	Juvenile/Sapling	openforis picture	Width 0,7	vegetating	65s-38/4	13	48	bf115c85-b861-474f-abb7-72471a4d85e7
2023815133338	2023815133338	2023	8	15	9	23	65s	2023	8	15	13	33	38	2		Fern	zz		Lepisorus spicata	Polypodiaceae	valid	0.2	204	1.9	2.5	3.4	0		false	0	vegetating	3	0	0	3.3	0		1	main trunk	Juvenile/Sapling	openforis picture	Width 0,5	vegetating	65s-38/5	13	49	455c4211-7289-42ed-aec3-7924e6a52e30
2023815133338	2023815133338	2023	8	15	9	23	65s	2023	8	15	13	33	38	2		Fern	zz		Lepisorus spicata	Polypodiaceae	valid	0.22	224	1.1	1.5	1.4	0		false	0	vegetating	4	0	0	1.6	0		1	main trunk	Juvenile/Sapling	openforis picture	Width 0,3	vegetating	65s-38/6	13	49	f5a68b22-6d64-46c0-b621-abd4ea4fca24
2023815133338	2023815133338	2023	8	15	9	23	65s	2023	8	15	13	33	38	2		Fern	FERN_175		Microsorum scolopendria	Polypodiaceae	valid	0.25	132	5.1	12.1	4.2	0		false	0	vegetating	3	0	0	6.1	0	0.3	1	main trunk	Subadult	openforis picture	Width 1,1	vegetating	65s-38/7	13	50	178483a0-2059-489e-a27c-7ef37432c865
2023815133338	2023815133338	2023	8	15	9	23	65s	2023	8	15	13	33	38	2		Fern	zz		Microsorum punctatum	Polypodiaceae	seedling	0.3	172	0.2	0.3	0.7	0		false	0	vegetating	2	0	0	0.5	0		1	main trunk	Juvenile/Sapling	openforis picture	Width 0,3	vegetating	65s-38/8	13	50	40fc68ae-7509-426d-b9f1-2d73b7b83d68
2023815133338	2023815133338	2023	8	15	9	23	65s	2023	8	15	13	33	38	2		Fern	zz		Microsorum punctatum	Polypodiaceae	seedling	0.46	224	1.4	1.8	1.2	0		false	0	vegetating	6	0	0	1.2	0		1	main trunk	Juvenile/Sapling	openforis picture	Width 0,4	vegetating	65s-38/9	13	51	db128969-9e01-40e3-9daf-c4694c169c90
2023815133338	2023815133338	2023	8	15	9	23	65s	2023	8	15	13	33	38	2		Fern	zz		Lepisorus spicata	Polypodiaceae	valid	0.9	122	9.9	8.9	11.3	0		false	0	vegetating	5	0	0	12.3	0		1	main trunk	Adult	openforis picture	Width 1,3	vegetating	65s-38/10	14	4	540a8c68-2286-4960-9971-fcf9e065851d
2023815133338	2023815133338	2023	8	15	9	23	65s	2023	8	15	13	33	38	2		Fern	zz		Lepisorus spicata	Polypodiaceae	valid	1.1	114	3.6	6.2	7.5	0		false	0	vegetating	3	0	0	7.7	0		1	main trunk	Subadult	openforis picture	Width 0,8	vegetating	65s-38/11	14	4	e6221e39-7f74-4798-a425-eac0e020088e
2023815133338	2023815133338	2023	8	15	9	23	65s	2023	8	15	13	33	38	2		Fern	zz		Lepisorus spicata	Polypodiaceae	valid	1.1	126	0.9	2.4	1.4	0		false	0	vegetating	4	0	0	1.8	0		1	main trunk	Juvenile/Sapling	openforis picture	Width 0,4	vegetating	65s-38/12	14	5	1478c11f-aa22-449f-af5f-a5ab2f29cb0a
2023815133338	2023815133338	2023	8	15	9	23	65s	2023	8	15	13	33	38	2		Fern	zz		Lepisorus spicata	Polypodiaceae	valid	1.05	224	4.8	7.3	8	0		false	0	vegetating	4	0	0	7.9	0		1	main trunk	Subadult	openforis picture	Width 0,9	vegetating	65s-38/13	14	6	5111a716-4f44-4af1-a5e1-6f28e6e4b9ab
2023815133338	2023815133338	2023	8	15	9	23	65s	2023	8	15	13	33	38	2		Fern	zz		Lepisorus spicata	Polypodiaceae	valid	1.65	104	3.5	8.1	8.2	0		false	0	vegetating	9	0	0	8	0		1	main trunk	Subadult	openforis picture	Width 0,7	vegetating	65s-38/14	14	7	46c5ccaa-ef63-4dc4-97a1-b9d4a5c9c5c5
2023815133338	2023815133338	2023	8	15	9	23	65s	2023	8	15	13	33	38	2		Fern	zz		Lepisorus spicata	Polypodiaceae	valid	1.94	306	2.7	3.5	4.3	0		false	0	vegetating	5	0	0	4.3	0		1	main trunk	Subadult	openforis picture	Width 0,6	vegetating	65s-38/15	14	17	5e25388b-4f1b-46e2-8032-e58c822c01cb
2023815133338	2023815133338	2023	8	15	9	23	65s	2023	8	15	13	33	38	2		Fern	zz		Lepisorus spicata	Polypodiaceae	valid	1.94	306	0.7	2	1	0		false	0	vegetating	5	0	0	1	0		1	main trunk	Juvenile/Sapling	openforis picture	Width 0,2	vegetating	65s-38/16	14	18	6fbed1b0-e766-437f-9cdd-3584f77da30a
2023815133338	2023815133338	2023	8	15	9	23	65s	2023	8	15	13	33	38	1		Seed plant	MUS_400		Angraecum sp.	orchidaceae	valid	1.93	224	4.8	6.9	5.3	0		false	0	vegetating	7	0	0	5.8	0		1	main trunk	Subadult	openforis picture	Width 1	vegetating	65s-38/17	14	18	12ef5877-bc94-4a45-a3a1-390caf907d83
2023815133338	2023815133338	2023	8	15	9	23	65s	2023	8	15	13	33	38	2		Fern	zz		Lepisorus spicata	Polypodiaceae	valid	2	196	2.4	2.1	3	0		false	0	vegetating	3	0	0	4.4	0		1	main trunk	Subadult	openforis picture	Width 0,6	vegetating	65s-38/18	14	20	d4e50068-93ed-4b9f-8653-7a174e8d75d1
2023815133338	2023815133338	2023	8	15	9	23	65s	2023	8	15	13	33	38	1		Seed plant	MUS_400		Angraecum sp.	orchidaceae	valid	2.2	146				0		false	0	vegetating	6	0	0				1	main trunk	Subadult	openforis picture		vegetating	65s-38/19	14	28	3f73857d-c5b0-451c-952c-27766b48cc48
2023815133338	2023815133338	2023	8	15	9	23	65s	2023	8	15	13	33	38	2		Fern	zz		Lepisorus spicata	Polypodiaceae	valid	2.12	260				0		false	0	vegetating	4	0	0		0		1	main trunk	Subadult	openforis picture		vegetating	65s-38/20	14	29	1667e9f3-fb54-4fe1-97d0-97220bbf970b
2023815133338	2023815133338	2023	8	15	9	23	65s	2023	8	15	13	33	38	2		Fern	zz		Lepisorus spicata	Polypodiaceae	valid	2.45	252				0		false	0	vegetating	5	0	0		0		1	main trunk	Subadult	openforis picture		vegetating	65s-38/21	14	30	fa0e04e1-863e-416e-ac8a-2b5e02e83738
2023815145439	2023815145439	2023	8	15	9	23	65s	2023	8	15	14	54	39	2		Fern	zz		Microsorum punctatum	Polypodiaceae	seedling	0.21	36	0.2	0.5	0.4	0		false	0	vegetating	4	0	0	0.3	0		1	main trunk	Juvenile/Sapling	openforis picture	Width 0,1		65s-39/	14	58	c0f0a86c-b17d-4146-867f-d93182fe194f
2023815152944	2023815152944	2023	8	15	9	23	65s	2023	8	15	15	29	44	2		Fern	zz		Microsorum punctatum	Polypodiaceae	seedling	0.28	296	0.5	0.6	0.8	0		false	0	vegetating	3	0	0	0.7	0		1	main trunk	Juvenile/Sapling	openforis picture	Width 0,3		65s-44/	15	38	7b182316-50e5-4919-b70e-56c2240228fc
202381491726	202381491726	2023	8	14	8	59	65s	2023	8	14	9	17	26	2		Fern	FERN_173		Microsorum punctatum	Polypodiaceae	seedling	0.9	140	3.8	3.3	1.8	0		false	0	vegetating	8	0	0	2.2	0	0.3	1	main trunk	Juvenile/Sapling	101-22-24	Width - 0.7	vegetating	65s-26/1	9	30	63772b66-e846-4a3e-b319-745d4e12db75
2023814102630	2023814102630	2023	8	14	8	59	65s	2023	8	14	10	26	30	1		Seed plant	MUS_385		Angraecum sp.	orchidaceae	valid	1.05	156	1.6	3.1	2.9	3.1		false	0	vegetating	4	0	0				1	main trunk	Subadult	025-27	Width - 0.4	vegetating	65s-30/1	10	41	c1a38bbd-9288-43be-8f67-e818c26a85ec
2023814102630	2023814102630	2023	8	14	8	59	65s	2023	8	14	10	26	30	1		Seed plant	MUS_385		Angraecum sp.	orchidaceae	valid	1.84	178	2	2	2.9	2.6		false	0	vegetating	3	0	0				1	main trunk	Subadult	027-030	Width- 0.3	vegetating	65s-30/2	10	45	47830313-1091-4450-9da7-915719314f4e
2023814102630	2023814102630	2023	8	14	8	59	65s	2023	8	14	10	26	30	1		Seed plant	MUS_400		Angraecum sp.	orchidaceae	valid	2.7					0		false	5	dry/fallen fruit	6	0	0				1	main trunk	Adult	031-033		vegetating	65s-30/3	10	50	34ebb202-124d-4181-9652-9ad6a4ed4d6e
2023814102630	2023814102630	2023	8	14	8	59	65s	2023	8	14	10	26	30	1		Seed plant	MUS_400		Angraecum sp.	orchidaceae	valid	0.45	80	2.1	5.3	5	3.9		false	0	vegetating	3	0	0				1	main trunk	Subadult	034-038	Width- 0.6	vegetating	65s-30/4	10	54	632b7d42-d719-4012-b758-3fe6a40263b1
2023814102630	2023814102630	2023	8	14	8	59	65s	2023	8	14	10	26	30	1		Seed plant	MUS_400		Angraecum sp.	orchidaceae	valid	0.75	40	7.3	7.7	7.8	8.9		false	0	dry/fallen fruit	4	0	0				1	main trunk	Adult	039-044	Width- 0.6		65s-30/5	10	59	6f60248a-338e-49e1-897b-db740cb9ca0d
2023814102630	2023814102630	2023	8	14	8	59	65s	2023	8	14	10	26	30	1		Seed plant	MUS_400		Angraecum sp.	orchidaceae	valid	1.61	174	1.2	2	2.3	2.5		false	0	vegetating	5	0	0				1	main trunk	Subadult	045-051	Width-0.6	vegetating	65s-30/6	11	4	b5e9aedf-77da-4516-8a76-ada11c329c37
2023814102630	2023814102630	2023	8	14	8	59	65s	2023	8	14	10	26	30	1		Seed plant	MUS_400		Angraecum sp.	orchidaceae	valid	1.71	156	1.3	3.3	2.8	2.2		false	0	vegetating	4	0	0				1	main trunk	Subadult	052-056	Width-0.7	vegetating	65s-30/7	11	9	553a7460-461a-4620-92d6-a61c7fce8486
2023814102630	2023814102630	2023	8	14	8	59	65s	2023	8	14	10	26	30	1		Seed plant	MUS_400		Angraecum sp.	orchidaceae	valid	1.82	156	0.5	2.8	2.8	2.2		false	0	vegetating	4	0	0				1	main trunk	Subadult	057-060	Width-0.6	vegetating	65s-30/8	11	12	2041eb13-eab5-478f-9d45-160c2bdf3221
2023814102630	2023814102630	2023	8	14	8	59	65s	2023	8	14	10	26	30	1		Seed plant	MUS_400		Angraecum sp.	orchidaceae	valid	2.33	128				0		false	0	vegetating	3	0	0				1	main trunk	Juvenile/Sapling	061-062		vegetating	65s-30/9	11	16	44db814a-d19d-45c6-a4f9-3d67e5c61d7c
2023814102630	2023814102630	2023	8	14	8	59	65s	2023	8	14	10	26	30	1		Seed plant	MUS_400		Angraecum sp.	orchidaceae	valid	2.33	128				0		false	0	vegetating	3	0	0				1	main trunk	Juvenile/Sapling	061-062		vegetating	65s-30/10	11	19	41b1fe0e-c16f-40c6-b3b2-e2c1f71e800d
2023814102630	2023814102630	2023	8	14	8	59	65s	2023	8	14	10	26	30	1		Seed plant	MUS_400		Angraecum sp.	orchidaceae	valid	2.4	134				0		false	0	vegetating	2	0	0				1	main trunk	Juvenile/Sapling	063-064		vegetating	65s-30/11	11	20	56c9b08f-70c1-41a9-b746-0c4645f1692c
2023814102630	2023814102630	2023	8	14	8	59	65s	2023	8	14	10	26	30	1		Seed plant	MUS_400		Angraecum sp.	orchidaceae	valid	2.82					0		false		dry/fallen fruit	6	0	0				1	main trunk	Adult	064-067		vegetating	65s-30/12	11	23	1939516a-833d-4bf4-a779-63d0ecb8d694
2023814113532	2023814113532	2023	8	14	8	59	65s	2023	8	14	11	35	32	1		Seed plant	MUS_400		Angraecum sp.	orchidaceae	valid	1.09	260	1.6	1.9	2.1	1.5		false	0	vegetating	4	0	0				1	main trunk	Juvenile/Sapling	068-072	Width-0.5	vegetating	65s-32/1	11	46	52b56f62-a095-4be6-9624-d6d9237d99e8
2023814113532	2023814113532	2023	8	14	8	59	65s	2023	8	14	11	35	32	1		Seed plant	MUS_400		Angraecum sp.	orchidaceae	valid	1.65	280	1.9	0.8	1.4	1.8		false	0	vegetating	3	0	0				1	main trunk	Adult	073-076	Width-0.4		65s-32/2	11	57	8799ebd5-4020-4aa7-a2b1-347a7a247945
2023814113532	2023814113532	2023	8	14	8	59	65s	2023	8	14	11	35	32	1		Seed plant	MUS_400		Angraecum sp.	orchidaceae	valid	1.78	74	4.3	8.3	3.4	6.4		false	4	ripe fruit	5	0	3				1	main trunk	Adult	077-081	Width-0.9	fruiting	65s-32/3	12	2	3f3b28be-7db6-4ec3-9972-e36d92be0015
2023814113532	2023814113532	2023	8	14	8	59	65s	2023	8	14	11	35	32	1		Seed plant	MUS_400		Angraecum sp.	orchidaceae	valid	3.46	100				0		false	0	vegetating	5	0	0				1	main trunk	Subadult	082-084		vegetating	65s-32/4	12	7	30421d88-55ea-4901-b598-9c3d2b695c9a
2023814113532	2023814113532	2023	8	14	8	59	65s	2023	8	14	11	35	32	1		Seed plant	MUS_400		Angraecum sp.	orchidaceae	valid	4	186				0		false	5	dry/fallen fruit	3	0	0				1	main trunk	Adult	085-087		vegetating	65s-32/5	12	12	33ad87de-e8f2-4e13-bdf3-77664c96e440
2023814121533	2023814121533	2023	8	14	8	59	65s	2023	8	14	12	15	33	1		Seed plant	MUS_400		Angraecum sp.	orchidaceae	valid	2.45	118				0		false	5	dry/fallen fruit	4	0	0				1	main trunk	Adult	088-089		vegetating	65s-33/1	12	25	681dc3a8-c25a-4b58-a131-185bb6f58a08
2023814121533	2023814121533	2023	8	14	8	59	65s	2023	8	14	12	15	33	1		Seed plant	MUS_400		Angraecum sp.	orchidaceae	valid	2.65	146				0		false	0	vegetating	5	0	0				1	main trunk	Subadult	090-091		vegetating	65s-33/2	12	28	f7133f3d-f1c7-478d-bb51-f831ac0515a2
2023814121533	2023814121533	2023	8	14	8	59	65s	2023	8	14	12	15	33	1		Seed plant	MUS_400		Angraecum sp.	orchidaceae	valid	3.9	182				0		false	0	vegetating	3	0	0				1	main trunk	Juvenile/Sapling	092-093		vegetating	65s-33/3	12	31	f0943911-5463-4592-91b0-f34534d779d2
2023814121533	2023814121533	2023	8	14	8	59	65s	2023	8	14	12	15	33	1		Seed plant	MUS_400		Angraecum sp.	orchidaceae	valid	4	168				0		false	4	ripe fruit	5	0	4				1	main trunk	Adult	094-095		fruiting	65s-33/4	12	33	ad152edd-4179-4a92-b36b-128221774700
2023814132434	2023814132434	2023	8	14	8	59	65s	2023	8	14	13	24	34	2		Fern	FERN_175		Microsorum scolopendria	Polypodiaceae	valid	-0.1	128	13.2	8.8	7	0		false	0	vegetating	11	0	0	8.8	0	0.2	1	main trunk	Subadult	096-098	Width- 1.7	vegetating	65s-34/1	13	35	9ebdb39f-884e-4e3d-9fae-559ec6efa394
2023814132434	2023814132434	2023	8	14	8	59	65s	2023	8	14	13	24	34	2		Fern	FERN_173		Microsorum punctatum	Polypodiaceae	valid	-0.05	272	4.9	1.4	1.7	0		false	0	vegetating	2	0	0	1.9	0	0	1	main trunk	Adult	101-104	Width- 1.0	vegetating	65s-34/2	13	45	28c9c0a6-c372-47c8-a2ea-24fbbe6e1c5c
2023814132434	2023814132434	2023	8	14	8	59	65s	2023	8	14	13	24	34	2		Fern	FERN_173		Microsorum punctatum	Polypodiaceae	seedling	0.25	274	0.7	1.6	1.3	0			0	vegetating	3	0	0	1.3		0	1	main trunk	Juvenile/Sapling	105-107	Width-0.6	vegetating	65s-34/3	13	57	15529074-2f9a-46aa-b267-b6fa96327e11
2023814132434	2023814132434	2023	8	14	8	59	65s	2023	8	14	13	24	34	2		Fern	FERN_173		Microsorum punctatum	Polypodiaceae	seedling	0.3	302	1.1	1.4	1.4	0		false	0	vegetating	3	0	0	0.8	0	0	1	main trunk	Juvenile/Sapling	108-111	Width-0.5	vegetating	65s-34/4	14	0	5244a151-d9ff-4112-8bdb-b4d5697f4878
20238141463	20238141463	2023	8	14	8	59	65s	2023	8	14	14	6	3	2		Fern	FERN_173		Microsorum punctatum	Polypodiaceae	valid	0.13	352	15.3	5.5	5.6	0		false	0	vegetating	5	0	0	10.1	0	0	1	main trunk	Adult	112-114	Width- 1.7	vegetating	65s-3/1	14	13	5565d782-6d51-441b-8bf2-41632742b2ba
20238141463	20238141463	2023	8	14	8	59	65s	2023	8	14	14	6	3	2		Fern	FERN_173		Microsorum punctatum	Polypodiaceae	seedling	0.22	344	1.5	2.9	0.5	0		false	0	vegetating	4	0	0	1.6	0	0	1	main trunk	Subadult	115-116	Width-0.6	vegetating	65s-3/2	14	18	99c02639-0330-40e9-85dc-4491ca1892c1
20238141463	20238141463	2023	8	14	8	59	65s	2023	8	14	14	6	3	2		Fern	FERN_173		Lepisorus spicata	Polypodiaceae	valid	0.99	8	1.8	3.5	1.3	0		false	0	vegetating	1	0	0	3.7	0	0	1	main trunk	Subadult	117-119	Width-0.6 (leaf was missing tip)		65s-3/3	14	20	c487aa9b-976c-40c9-920a-438f4389c853
20238141463	20238141463	2023	8	14	8	59	65s	2023	8	14	14	6	3	2		Fern	FERN_173		Lepisorus spicata	Polypodiaceae	valid	1.77	290	4.5	3.4	7.6	0		false	0	vegetating	5	0	0	7.5	0	0	1	main trunk	Subadult	120-123	Width-0.6	vegetating	65s-3/4	14	23	1883b255-4c2e-49ed-9c0d-c0a900f836dc
20238141463	20238141463	2023	8	14	8	59	65s	2023	8	14	14	6	3	2		Fern	FERN_175		Lepisorus spicata	Polypodiaceae	valid	1.85	322	22.5	14	14	0		false	0	vegetating	4	0	0	12.9	3	0	1	main trunk	Adult	124-128	Width-1.4	reproducing	65s-3/5	14	26	af4c7754-fad1-43d0-8d16-ee8e6eec7e3f
20238141463	20238141463	2023	8	14	8	59	65s	2023	8	14	14	6	3	2		Fern	FERN_173		Microsorum punctatum	Polypodiaceae	valid	1.85	342	8	9.6	9.4	0		false	0	vegetating	4	0	0	10.2	0	0	1	main trunk	Subadult	129-131	Width- 2.4	vegetating	65s-3/6	14	31	6c397500-6cd0-40aa-b3a2-52400a6b0104
2023814145035	2023814145035	2023	8	14	8	59	65s	2023	8	14	14	50	35	2		Fern	zz		Microsorum punctatum	Polypodiaceae	seedling	0.01	190	0.6	0.8	0.8	0		false	0	vegetating	2	0	0	0.6	0	0	1	main trunk	Juvenile/Sapling	132-134	Width- 0.2	vegetating	65s-35/1	15	0	4a3206ef-624b-4cfd-a302-da7009a64832
2023814145035	2023814145035	2023	8	14	8	59	65s	2023	8	14	14	50	35	2		Fern	zz		Microsorum punctatum	Polypodiaceae	seedling	0.1	146	1.1	0.3	1	0		false	0	vegetating	2	0	0	0.9	0	0	1	main trunk	Juvenile/Sapling	135-137	Width-0.2	vegetating	65s-35/2	15	5	68f2738a-89ca-46dd-9a61-7d48e0dbf2f7
2023814145035	2023814145035	2023	8	14	8	59	65s	2023	8	14	14	50	35	2		Fern	FERN_173		Microsorum punctatum	Polypodiaceae	seedling	0.2	204	2.1	2	0.8	0		false	0	vegetating	3	0	0	2.6	0	0	1	main trunk	Juvenile/Sapling	143-144	width- 0.8		65s-35/3	15	10	0bae3812-0e2c-41d9-b4eb-8f5288c86c20
2023814145035	2023814145035	2023	8	14	8	59	65s	2023	8	14	14	50	35	2		Fern	zz		Microsorum punctatum	Polypodiaceae	seedling	0.25	150	0.7	0.9	0.5	0		false	0	vegetating	2	0	0	0.7			1	main trunk	Juvenile/Sapling	139-142	Width-0.3	vegetating	65s-35/4	15	16	c13d83e8-be5a-4d30-9cf2-fbc351ff85ee
2023814145035	2023814145035	2023	8	14	8	59	65s	2023	8	14	14	50	35	2		Fern	zz		Microsorum punctatum	Polypodiaceae	seedling	0.3	52	1.2	1.2	0.4	0		false	0	vegetating	2	0	0	0.9	0	0	1	main trunk	Juvenile/Sapling	145-147	Width-0.3	vegetating	65s-35/5	15	19	b5a77d1a-cc6b-43d8-9975-f1a6198e29bb
2023814145035	2023814145035	2023	8	14	8	59	65s	2023	8	14	14	50	35	2		Fern	zz		Microsorum punctatum	Polypodiaceae	seedling	0.32	36	0.8	1.3	1	0		false	0	vegetating	4	0	0	0.9			1	main trunk	Juvenile/Sapling	148-150	Width- 0.6		65s-35/6	15	23	1a160582-92a1-4491-a29f-93f85de4fb3f
2023814145035	2023814145035	2023	8	14	8	59	65s	2023	8	14	14	50	35	1		Seed plant	MUS_400		Angraecum sp.	orchidaceae	valid	2.18	262				0		false	0	vegetating	2	0	0				1	main trunk	Juvenile/Sapling	163-166		vegetating	65s-35/7	15	26	727f9d7f-fd47-45ba-83b5-c77a62a61d0f
2023814145035	2023814145035	2023	8	14	8	59	65s	2023	8	14	14	50	35	1		Seed plant	MUS_400		Angraecum sp.	orchidaceae	valid	2.22	242				0		false	3	unripe fruit	5	0	1				1	main trunk	Adult	154-156; 167-168		fruiting	65s-35/8	15	30	0f7f44e1-8cbd-45e9-ac97-90ec33fbabd1
2023814145035	2023814145035	2023	8	14	8	59	65s	2023	8	14	14	50	35	1		Seed plant	MUS_400		Angraecum sp.	orchidaceae	valid	2.25	194				0		false	0	vegetating	5	0	0				1	main trunk	Subadult	157-158; 169-170		vegetating	65s-35/9	15	33	1c537f6e-423b-49a6-83b7-69846104fcbb
2023814145035	2023814145035	2023	8	14	8	59	65s	2023	8	14	14	50	35	1		Seed plant	MUS_400		Angraecum sp.	orchidaceae	valid	2.25	134				0		false	5	dry/fallen fruit	5	0	0				1	main trunk	Adult	159-162; 171-173		vegetating	65s-35/10	15	35	7c5ca120-7f4a-4473-bc91-d7c39ffa5ec7
2023814145035	2023814145035	2023	8	14	8	59	65s	2023	8	14	14	50	35	1		Seed plant	MUS_400		Angraecum sp.	orchidaceae	valid	2.3	2				0				vegetating	4	0	0				1	main trunk	Juvenile/Sapling	177			65s-35/11	15	38	164a07ac-3457-45e2-9e95-09a1c4c6aaec
202381694846	202381694846	2023	8	16	9	21	65s	2023	8	16	9	48	46	2		Fern	FERN_175		Microsorum scolopendria	Polypodiaceae	valid	0.13	298	0.13	19.2	8.5	0		false	0	vegetating	13	0	0	11.4		0.4	1	main trunk	Adult	266 - 268	Width: 2.1 cm	vegetating	65s-46/1	9	53	b414d067-78f6-4cd5-b23e-3e5fbc4a236c
202381610847	202381610847	2023	8	16	9	21	65s	2023	8	16	10	8	47	2		Fern	zz		Microsorum punctatum	Polypodiaceae	seedling	-0.1	180	0.4	0.4	0.6	0		false	0	vegetating	3	0	0	0.5			1	main trunk	Juvenile/Sapling	272 - 275	Width: 0,2 cm	vegetating	65s-47/1	10	18	e33f2d2e-bfb5-46bf-98c3-d88608922b6c
202381610847	202381610847	2023	8	16	9	21	65s	2023	8	16	10	8	47	2		Fern	zz		Microsorum punctatum	Polypodiaceae	seedling						0		false	0	vegetating	2	0	0				1	main trunk		276 - 278			65s-47/3	10	26	8bd304b6-31e3-4437-b7fe-f5e58ceac8d2
202381610847	202381610847	2023	8	16	9	21	65s	2023	8	16	10	8	47	2		Fern	zz		Microsorum punctatum	Polypodiaceae	seedling	0.05	314	0.5	0.3	0.1	0		false	0	vegetating	2	0	0	0.7			1	main trunk	Juvenile/Sapling	279 - 287	Width: 0,3 cm	vegetating	65s-47/4	10	28	675ed485-1aa3-4610-8c00-0ca28edfaff6
202381610847	202381610847	2023	8	16	9	21	65s	2023	8	16	10	8	47	2		Fern	zz		Microsorum punctatum	Polypodiaceae	seedling	0.05	226	0.5	0.5	0.3	0		false	0	vegetating	3	0	0	0.5			1	main trunk	Juvenile/Sapling	288 - 293	Width: 0,3 cm	vegetating	65s-47/5	10	36	9bb19277-175c-49f5-ac33-f5ddb17ad43a
202381610847	202381610847	2023	8	16	9	21	65s	2023	8	16	10	8	47	2		Fern	zz		Microsorum punctatum	Polypodiaceae	valid	1.9	52	1.4	2.9	1.4	0		false	0	vegetating	3	0	0	2.4		0.2	1	main trunk	Juvenile/Sapling	294 - 297	Width: 1,9 cm	vegetating	65s-47/6	10	41	1f3cf76a-9ae8-4dc7-81ed-753cce708a7e
202381610847	202381610847	2023	8	16	9	21	65s	2023	8	16	10	8	47	2		Fern	zz		Microsorum punctatum	Polypodiaceae	valid	1.95	220	7.8	15	8.2	0		false	0	vegetating	5	0	0	9.1		0.4	1	main trunk	Subadult	298 - 301	Width: 1,9 cm	vegetating	65s-47/7	10	44	dcc83be8-031a-432c-b9ea-5111386f943d
202381610847	202381610847	2023	8	16	9	21	65s	2023	8	16	10	8	47	2		Fern	zz		Microsorum punctatum	Polypodiaceae	valid	2	220	6.1	6.9	4.1	0		false	0	vegetating	7	0	0	5.5		0.4	1	main trunk	Subadult	302 - 304	Width: 1,5 cm	vegetating	65s-47/8	10	47	2110509a-3feb-476e-a62b-1806e6eefaf7
202381610847	202381610847	2023	8	16	9	21	65s	2023	8	16	10	8	47	2		Fern	zz		Lepisorus spicata	Polypodiaceae	valid	2.4	220	9.6	7.8	12	0		false	0	vegetating	6	0	0	12.2	3	0.6	1	main trunk	Adult	305 - 308	Width: 0,8 cm	vegetating	65s-47/9	10	50	673ec4ee-5229-42a4-b627-60536dcf1026
2023816105848	2023816105848	2023	8	16	9	21	65s	2023	8	16	10	58	48	2		Fern	zz		Lepisorus spicata	Polypodiaceae	valid	0	160	2.3	1.7	6.5	0		false	0	vegetating	3	0	0	6.6		0.2	1	main trunk	Subadult	309 - 311	Width: 0,5 cm	vegetating	65s-/1	11	9	914b0699-5eaa-4958-b93f-399fbde1318c
2023816105848	2023816105848	2023	8	16	9	21	65s	2023	8	16	10	58	48	2		Fern	zz		Microsorum scolopendria	Polypodiaceae	seedling	0.05	218	1.6	2.8	3.4	0		false	0	vegetating	3	0	0	3.4		0.1	1	main trunk	Juvenile/Sapling	312 - 314	Width: 0,5 cm	vegetating	65s-48/2	11	13	ebf1d8ac-8273-45de-8c74-cd009a070d05
2023816105848	2023816105848	2023	8	16	9	21	65s	2023	8	16	10	58	48	2		Fern	zz		Lepisorus spicata	Polypodiaceae	valid	0.37	158	1.3	3.9	4.9	0		false	0	vegetating	2	0	0	5.4		0.2	1	main trunk	Subadult	315 - 317	Width: 0,5 cm	vegetating	65s-48/3	11	16	155eeafb-aa99-48ae-abe3-9d33ec4b0944
2023816105848	2023816105848	2023	8	16	9	21	65s	2023	8	16	10	58	48	2		Fern	zz		Microsorum scolopendria	Polypodiaceae	seedling	0.4	266	3.4	3.2	5.2	0		false	0	vegetating	3	0	0	5.2		0.2	1	main trunk	Subadult	318 - 322	Width: 0,7 cm	vegetating	65s-48/4	11	19	db97365d-5143-411a-8eac-5168adddfa5e
2023816105848	2023816105848	2023	8	16	9	21	65s	2023	8	16	10	58	48	2		Fern	zz		Microsorum punctatum	Polypodiaceae	seedling	0.51	280	0.7	1.7	0.8	0		false	0	vegetating	4	0	0	1		0.1	1	main trunk	Juvenile/Sapling	323 - 325	Width: 0,5 cm	vegetating	65s-48/5	11	21	cb16d47b-c082-48da-9a38-3756d56baf1f
2023816105848	2023816105848	2023	8	16	9	21	65s	2023	8	16	10	58	48	2		Fern	zz		Microsorum punctatum	Polypodiaceae	valid	0.55	262	1.8	3.3	1.4	0		false	0	vegetating	4	0	0	2.1		0.1	1	main trunk	Subadult	326 - 328	Width: 0,8 cm	vegetating	65s-48/6	11	24	052e940b-e5ff-4511-8b4f-e09280847184
2023816105848	2023816105848	2023	8	16	9	21	65s	2023	8	16	10	58	48	2		Fern	zz		Microsorum punctatum	Polypodiaceae	valid	0.6	184	2	2.5	2.3	0		false	0	vegetating	3	0	0	3.4		0.1	1	main trunk	Subadult	329 - 332	Width: 1,2 cm	vegetating	65s-48/7	11	26	55e30f5d-0dad-46a5-933c-ba3956217e80
2023816105848	2023816105848	2023	8	16	9	21	65s	2023	8	16	10	58	48	2		Fern	zz		Microsorum punctatum	Polypodiaceae	valid	0.8	274	5.2	2.3	2.7	0		false	0	vegetating	5	0	0	4.4			1	main trunk	Subadult	333 - 336	Width: 1,1 cm	vegetating	65s-48/8	11	28	41db7fb6-ed51-4d98-be0e-a0237c7c24b0
2023816105848	2023816105848	2023	8	16	9	21	65s	2023	8	16	10	58	48	2		Fern	zz		Microsorum punctatum	Polypodiaceae	valid	1.2	266	4.4	4.8	4.2	0		false	0	vegetating	4	0	0	4.7		0.2	1	main trunk	Subadult	337 - 340	Width: 1,4 cm	vegetating	65s-48/9	11	31	f8d61e7d-bc17-4162-b314-36cc7b805fd1
2023816105848	2023816105848	2023	8	16	9	21	65s	2023	8	16	10	58	48	2		Fern	zz		Microsorum scolopendria	Polypodiaceae	seedling	1.25	280	5.4	3.3	6.2	0		false	0	vegetating	3	0	0	8.4		0.3	1	main trunk	Subadult	341 - 344	Width: 0,8 cm	vegetating	65s-48/10	11	33	383a6991-4f5c-4de0-8419-660d9ace2fea
2023816105848	2023816105848	2023	8	16	9	21	65s	2023	8	16	10	58	48	2		Fern	FERN_175		Microsorum scolopendria	Polypodiaceae	valid	0	174	90	32	15	0		false	0	vegetating	15	0	0	18		0.5	1	main trunk	Adult	345 - 348	Width: 3 cm	vegetating	65s-48/11	11	35	5b56548a-a819-4b29-8c69-54e6a547ff60
2023816105848	2023816105848	2023	8	16	9	21	65s	2023	8	16	10	58	48	2		Fern	zz		Microsorum punctatum	Polypodiaceae	valid	0.4	38	1.1	1.4	1.4	0		false	0	vegetating	4	0	0	1.2			1	main trunk	Juvenile/Sapling	349 - 352	Width: 0.6 cm	vegetating	65s-48/12	11	39	eef8da19-4d4b-4a07-9a09-1e91b0a43b71
2023816105848	2023816105848	2023	8	16	9	21	65s	2023	8	16	10	58	48	2		Fern	zz		Microsorum punctatum	Polypodiaceae	seedling	0.4	38	0.5	0.6	0.5	0		false	0	vegetating	2	0	0	0.5			1	main trunk	Juvenile/Sapling	357 - 358	Width: 0,3 cm	vegetating	65s-48/13	11	42	21533892-2c40-46c5-a2bd-0171712f1024
2023816105848	2023816105848	2023	8	16	9	21	65s	2023	8	16	10	58	48	2		Fern	zz		Microsorum punctatum	Polypodiaceae	seedling	0.42	38	0.4	0.5	0.2	0		false	0	vegetating	2	0	0	0.4			1	main trunk	Juvenile/Sapling	359 - 363	Width: 0,2 cm	vegetating	65s-48/14	11	46	2279e522-21bd-4336-ac5f-81e4c8b8f054
2023816123449	2023816123449	2023	8	16	9	21	65s	2023	8	16	12	34	49	2		Fern	zz		Microsorum punctatum	Polypodiaceae	seedling	-0.05	246	0.8	1.2	0.5	0		false	0	vegetating	3	0	0	1.1			1	main trunk	Juvenile/Sapling	368 - 371	Width: 0,3 cm	vegetating	65s-49/1	12	48	e20cbc33-9787-4592-92db-79081d57c3ab
2023816123449	2023816123449	2023	8	16	9	21	65s	2023	8	16	12	34	49	2		Fern	zz		Microsorum punctatum	Polypodiaceae	valid	0.02	242	1.7	3.5	1.8	0		false	0	vegetating	5	0	0	2.5			1	main trunk	Juvenile/Sapling	372 - 374	Width: 0,8 cm	vegetating	65s-49/2	12	51	e46ba85c-1bac-4f5f-be99-c2abcea6a90c
2023816123449	2023816123449	2023	8	16	9	21	65s	2023	8	16	12	34	49	2		Fern	zz		Microsorum punctatum	Polypodiaceae	seedling	0.03	262	1	0.8	0.8	0		false	0	vegetating	4	0	0	0.8			1	main trunk	Juvenile/Sapling	375 -377	Width: 0,4 cm	vegetating	65s-49/3	12	53	a031f17d-3b1a-457b-b9e4-85b38732970f
2023816123449	2023816123449	2023	8	16	9	21	65s	2023	8	16	12	34	49	2		Fern	zz		Lepisorus spicata	Polypodiaceae	valid	0.1	296	8.6	17.8	13	0		false	0	vegetating	7	0	0	17.5		0.3	1	main trunk	Adult	378 - 380	Width: 0,8 cm	vegetating	65s-49/4	12	55	b6ff9414-13da-45d4-af28-42e571b05c79
2023816123449	2023816123449	2023	8	16	9	21	65s	2023	8	16	12	34	49	2		Fern	zz		Microsorum punctatum	Polypodiaceae	valid	0.17	396	2.3	2.6	3.5	0		false	0	vegetating	5	0	0	3.5			1	main trunk	Juvenile/Sapling	381 - 383	Width: 0,8 cm	vegetating	65s-49/5	12	58	7a2dc946-199d-47d4-8e1f-855d2070df9d
2023816123449	2023816123449	2023	8	16	9	21	65s	2023	8	16	12	34	49	2		Fern	zz		Microsorum punctatum	Polypodiaceae	seedling	0.17	396	0.9	0.8	0.5	0		false	0	vegetating	3	0	0	0.8			1	main trunk	Juvenile/Sapling	385 - 386	Width: 0,3 cm	vegetating	65s-49/6	13	1	4c1a80ff-149b-42b6-9d29-5e30e9854715
2023816123449	2023816123449	2023	8	16	9	21	65s	2023	8	16	12	34	49	2		Fern	zz		Microsorum punctatum	Polypodiaceae	seedling	0.37	324	0.8	2.1	0.7	0		false	0	vegetating	3	0	0	0.9			1	main trunk	Juvenile/Sapling	387 - 390	Width: 0,3 cm	vegetating	65s-49/7	13	4	65dac153-e232-460a-851d-6ce68e15ec0b
2023816123449	2023816123449	2023	8	16	9	21	65s	2023	8	16	12	34	49	1		Seed plant	MUS_385		Angraecum sp.	orchidaceae	valid	1.3	204	1.2	2.5	1.5	2		false	0	vegetating	3	0	0				1	main trunk	Juvenile/Sapling	391 - 395	Width: 0,4 cm	vegetating	65s-49/8	13	7	3e5a5d24-b4ef-4cac-b2ff-b403549ce5ff
2023816123449	2023816123449	2023	8	16	9	21	65s	2023	8	16	12	34	49	1		Seed plant	MUS_385		Angraecum sp.	orchidaceae	valid	1.36	112	2.8	3.4	5.1	4.6		false	0	vegetating	5	0	0				1	main trunk	Subadult	396 - 400	Width: 0,8 cm	vegetating	65s-49/9	13	11	717383ab-30a4-46aa-9d74-9471f01e4940
2023816123449	2023816123449	2023	8	16	9	21	65s	2023	8	16	12	34	49	1		Seed plant	MUS_385		Angraecum sp.	orchidaceae	valid	1.37	112	4.2	7.7	7.5	6.9		false	3	unripe fruit	8	0	1				1	main trunk	Adult	401 - 406	Width: 0,9 cm	fruiting	65s-49/10	13	14	c20fdc49-a759-4818-89a5-0cba34e776cc
2023816123449	2023816123449	2023	8	16	9	21	65s	2023	8	16	12	34	49	1		Seed plant	MUS_385		Angraecum sp.	orchidaceae	valid	1.45	74	1.2	1.7	1.6	1.6		false	0	vegetating	4	0	0				1	main trunk	Juvenile/Sapling	407 - 410	Width: 0,4 cm	vegetating	65s-49/11	13	17	6aa7f26d-4e78-40fe-88f5-cccac001e3af
2023816123449	2023816123449	2023	8	16	9	21	65s	2023	8	16	12	34	49	1		Seed plant	MUS_385		Angraecum sp.	orchidaceae	valid	1.52	256	7.5	11.3	11	9.1		false	5	dry/fallen fruit	7	0	0				1	main trunk	Adult	411 - 415	Width: 1,1 cm	vegetating	65s-49/12	13	19	dfdb4f61-49be-4689-a1cd-4c86fa52be01
2023816123449	2023816123449	2023	8	16	9	21	65s	2023	8	16	12	34	49	1		Seed plant	MUS_385		Angraecum sp.	orchidaceae	valid	1.6	116	2.8	6.7	6.2	6		false	0	vegetating	5	0	0				1	main trunk	Subadult	416 - 419	Width: 1,0 cm	vegetating	65s-49/13	13	22	f6472af0-e102-4154-b84a-140a46374ab1
2023816123449	2023816123449	2023	8	16	9	21	65s	2023	8	16	12	34	49	1		Seed plant	MUS_385		Angraecum sp.	orchidaceae	valid	2.05	146	4.1	5.6	5.8	5.1		false	0	vegetating	7	0	0				1	main trunk	Subadult	420 - 425	Width: 0,9 cm	vegetating	65s-49/14	13	25	df0faef3-dd74-40c6-ab99-0a6355e792ca
2023816134552	2023816134552	2023	8	16	9	21	65s	2023	8	16	13	45	52	1		Seed plant	MUS_400		Angraecum sp.	orchidaceae	valid	1.15	306	3.2	3.6	2.9	3.3		false	0	vegetating	5	0	0				1	main trunk	Subadult	428 - 431	Width: 0,6 cm	vegetating	65s-52/1	13	51	267a1b99-6d9c-48a0-8a85-b55210c5610a
2023816134552	2023816134552	2023	8	16	9	21	65s	2023	8	16	13	45	52	1		Seed plant	MUS_400		Angraecum sp.	orchidaceae	valid	1.37	186	4.6	7.2	6.8	6.3		false	0	vegetating	5	0	0				1	main trunk	Subadult	432 - 434	Width: 1,3 cm	vegetating	65s-52/2	13	54	d5d2041c-9499-4c9e-b707-3f7e97212dcc
2023816134552	2023816134552	2023	8	16	9	21	65s	2023	8	16	13	45	52	1		Seed plant	MUS_400		Angraecum sp.	orchidaceae	valid	1.8	186	3	5.9	4.8	4.5		false	0	vegetating	4	0	0				1	main trunk	Subadult	435 - 438	Width: 0,8 cm	vegetating	65s-52/3	13	56	d91ab4f0-aac4-443b-b6d1-83dbf47a1262
2023816134552	2023816134552	2023	8	16	9	21	65s	2023	8	16	13	45	52	1		Seed plant	MUS_400		Angraecum sp.	orchidaceae	valid	1.67	80	1.9	3	1.8	2.3		false	0	vegetating	3	0	0				1	main trunk	Subadult	339 - 341	Width: 0,4 cm	vegetating	65s-52/4	13	59	d7b6ed32-b2fc-42ed-a87b-2888313b4fc8
2023816134552	2023816134552	2023	8	16	9	21	65s	2023	8	16	13	45	52	1		Seed plant	MUS_400		Angraecum sp.	orchidaceae	valid	1.85	322	3.6	4.7	3.5	4		false	0	vegetating	6	0	0				1	main trunk	Subadult	442 - 444	Width: 0,9 cm	vegetating	65s-52/5	14	1	94c66c46-08de-4cf4-9b44-11ffd7c101ec
2023816134552	2023816134552	2023	8	16	9	21	65s	2023	8	16	13	45	52	1		Seed plant	MUS_400		Angraecum sp.	orchidaceae	valid	1.86	230	6.5	1.7	4.3	3.6		false	0	vegetating	4	0	0				1	main trunk	Subadult	445 - 448	Width: 0,7 cm	vegetating	65s-52/6	14	3	55fb082d-ed41-4ee8-9c33-b4de34b59722
2023816134552	2023816134552	2023	8	16	9	21	65s	2023	8	16	13	45	52	1		Seed plant	MUS_400		Angraecum sp.	orchidaceae	valid	2.8	216				0		false	0	vegetating	5	0	0				1	main trunk	Subadult	449 - 451		vegetating	65s-52/7	14	6	cba6dacb-0a4d-400a-a384-18cbdcb12784
202381614852	202381614852	2023	8	16	9	21	65s	2023	8	16	14	8	52	2		Fern	zz	to confirm	Microsorum scolopendria	Polypodiaceae	valid	0.25	184	3.5	5.6	5.2	0		false	0	vegetating	4	0	0	6.6		0.3	1	main trunk	Juvenile/Sapling	452 - 455	Width: 1,8 cm	vegetating	65s-52/1	14	16	67860649-f6f4-4ac0-85a6-9f99ea4a7545
202381614852	202381614852	2023	8	16	9	21	65s	2023	8	16	14	8	52	2		Fern	zz	to confirm	Microsorum punctatum	Polypodiaceae	seedling	0.3	292	0.6	0.7	0.3	0		false	0	vegetating	3	0	0	0.5			1	main trunk	Juvenile/Sapling	457 - 460	Width: 0,3 cm	vegetating	65s-52/2	14	19	81ded908-bcdb-4503-be60-aa4b1307ec60
202381614852	202381614852	2023	8	16	9	21	65s	2023	8	16	14	8	52	2		Fern	FERN_175		Microsorum scolopendria	Polypodiaceae	valid	0	16	45	12.2	8.8	0		false	0	vegetating	3	0	0	5.4		0.4	1	main trunk	Subadult	461 - 465	Width: 2.4 cm	vegetating	65s-52/3	14	21	7c648213-69eb-493f-bb42-f7b078cb0792
202381614852	202381614852	2023	8	16	9	21	65s	2023	8	16	14	8	52	2		Fern	FERN_175		Microsorum scolopendria	Polypodiaceae	valid	0.1	16	60	7.3	5.6	0		false	0	vegetating	2	0	0	7.9			1	main trunk	Subadult	466 - 467	Width: 5,1 cm	vegetating	65s-52/4	14	26	e158ddc7-d7ba-4ade-9673-e6be13319495
202381614852	202381614852	2023	8	16	9	21	65s	2023	8	16	14	8	52	1		Seed plant	MUS_400		Polystachia mauritiana s.l.	orchidaceae	valid	0.65	126	6.2	9.3	10.8	0		false	4	ripe fruit	5	0	5	10.6			1	main trunk	Adult	468 - 473	Width: 1,6 cm	fruiting	65s-52/5	14	29	d9adb201-a3a3-45dd-8482-f96e85049a8a
202381614852	202381614852	2023	8	16	9	21	65s	2023	8	16	14	8	52	1		Seed plant	MUS_400		Polystachia mauritiana s.l.	orchidaceae	valid	0.7	110	9.2	15	15	0		false	3	unripe fruit	6	0	11	13.3			1	main trunk	Adult	474 - 481	Width: 1,9 cm. 7 Unripe and 4 Ripe fruits	fruiting	65s-52/6	14	33	5098c6cd-5f05-4c16-be45-3908bc4405c4
202381614852	202381614852	2023	8	16	9	21	65s	2023	8	16	14	8	52	1		Seed plant	MUS_400		Angraecum sp.	orchidaceae	valid	1.2	236	9.5	13.5	16.5	0		false	3	unripe fruit	6	0	3	14			1	main trunk	Adult	482 - 487	Width: 2,1 cm. 3 Unripe fruits + many fell	fruiting	65s-52/7	14	38	052a26f9-0bf2-480c-aaa6-c0d48c5b7aed
202381614852	202381614852	2023	8	16	9	21	65s	2023	8	16	14	8	52	1		Seed plant	MUS_400		Angraecum sp.	orchidaceae	valid	1.2	176	7.4	11.6	8	0		false	0	vegetating	4	0	0	8.1			1	main trunk	Subadult	488 - 491	Width: 1,0 cm	vegetating	65s-52/8	14	43	17bf26bf-aed0-4224-875c-40569e68974c
202381614852	202381614852	2023	8	16	9	21	65s	2023	8	16	14	8	52	1		Seed plant	MUS_400		Angraecum sp.	orchidaceae	valid	1.24	130	6.7	14.4	14.4	0		false	5	dry/fallen fruit	7	0	0	13.1			1	main trunk	Adult	492 - 495	Width: 1,6 cm	vegetating	65s-52/9	14	45	7f90959c-25a8-4974-9a71-549e50a26e0e
202381614852	202381614852	2023	8	16	9	21	65s	2023	8	16	14	8	52	1		Seed plant	MUS_400		Angraecum sp.	orchidaceae	valid	1.32	188	6.3	13.7	13.7	0		false	5	dry/fallen fruit	5	0	0	12			1	main trunk	Adult	496 - 499	Width: 1,5 cm	vegetating	65s-52/10	14	48	57a65473-916c-43bc-9aaa-f14130111959
202381614852	202381614852	2023	8	16	9	21	65s	2023	8	16	14	8	52	1		Seed plant	MUS_400		Angraecum sp.	orchidaceae	valid	1.1	324	5.7	12.7	10.1	0		false	3	unripe fruit	4	0	2	10.1			1	main trunk	Adult	500 - 505	Width: 1,6 cm. Fallen pod	fruiting	65s-52/11	14	50	15705d53-fbb0-4abc-b531-f182d7b0b2c3
202381614852	202381614852	2023	8	16	9	21	65s	2023	8	16	14	8	52	1		Seed plant	MUS_400		Angraecum sp.	orchidaceae	valid	1.15	336	3.3	4.2	4.4	0		false	0	vegetating	5	0	0	4			1	main trunk	Subadult	506 - 509	Width: 0,7 cm	vegetating	65s-52/12	14	53	404dae56-74a5-438d-823b-7f7bca093552
202381614852	202381614852	2023	8	16	9	21	65s	2023	8	16	14	8	52	1		Seed plant	MUS_400		Angraecum sp.	orchidaceae	valid	1.22	24	1.3	2.8	2.6	0		false	0	vegetating	4	0	0	2.4			1	main trunk	Subadult	510 - 514	Width: 0,5 cm	vegetating	65s-52/13	14	55	55038a38-7b4d-406a-9338-09453116d079
202381614852	202381614852	2023	8	16	9	21	65s	2023	8	16	14	8	52	1		Seed plant	MUS_400		Angraecum sp.	orchidaceae	valid	1.46	90	8.7	16.2	12	10.9		false	5	dry/fallen fruit	5	0	0				1	main trunk	Adult	515 - 518	Width: 2 cm	vegetating	65s-52/14	14	58	89751cba-1daa-4692-bb96-90e75c590be6
202381614852	202381614852	2023	8	16	9	21	65s	2023	8	16	14	8	52	1		Seed plant	MUS_400		Angraecum sp.	orchidaceae	valid	1.44	148	5.6	11.3	12.1	11.4		false	0	vegetating	5	0	0				1	main trunk	Subadult	520 - 522	Width: 1 cm	vegetating	65s-52/15	15	1	a2452b70-58ed-4cba-ad31-0e82f60fa005
202381614852	202381614852	2023	8	16	9	21	65s	2023	8	16	14	8	52	1		Seed plant	MUS_400		Angraecum sp.	orchidaceae	valid	1.45	124	9	22	16	15.5		false	3	unripe fruit	6	0	3				1	main trunk	Adult	523 - 526	Width: 2.8 cm. Many fallen fruits	fruiting	65s-52/16	15	3	674316ea-f511-41c8-a2d8-93202338ed16
202381614852	202381614852	2023	8	16	9	21	65s	2023	8	16	14	8	52	1		Seed plant	MUS_400		Angraecum sp.	orchidaceae	valid	1.4	152	7.1	16.5	10.4	9.7		false	3	unripe fruit	6	0	2				1	main trunk	Adult	527 - 531	Width: 1,7 cm. Many fallen fruits	fruiting	65s-52/17	15	6	c0a27ed5-0128-48b7-9217-3fb4f612a28d
202381614852	202381614852	2023	8	16	9	21	65s	2023	8	16	14	8	52	1		Seed plant	MUS_400		Angraecum sp.	orchidaceae	valid	1.66	350	7.4	14.2	10.5	9.2		false	3	unripe fruit	6	0	1				1	main trunk	Adult	532 - 535	Width: 1,6 cm	fruiting	65s-52/18	15	9	be69a6a3-e47a-499e-8e91-b758b31739d3
202381614852	202381614852	2023	8	16	9	21	65s	2023	8	16	14	8	52	1		Seed plant	MUS_400		Angraecum sp.	orchidaceae	valid	1.7	36	3	6.4	5.3	5.1		false	0	vegetating	6	0	0				1	main trunk	Subadult	536 - 539	Width: 1,1 cm	vegetating	65s-52/19	15	12	676f6125-c978-4275-82c9-723268906de2
202381614852	202381614852	2023	8	16	9	21	65s	2023	8	16	14	8	52	1		Seed plant	MUS_400		Angraecum sp.	orchidaceae	valid	1.8	58	3.2	11.1	10.8	9.7		false	5	dry/fallen fruit	6	0	0				1	main trunk	Adult	540 - 543	Width: 1,2 cm	vegetating	65s-52/20	15	13	00f83363-ae57-4803-843d-6428dadb4a4e
202381614852	202381614852	2023	8	16	9	21	65s	2023	8	16	14	8	52	1		Seed plant	MUS_400		Angraecum sp.	orchidaceae	valid	1.82	56	3	7.9	5.3	5.2		false	0	vegetating	7	0	0				1	main trunk	Subadult	544 - 547	Width: 0,9 cm	vegetating	65s-52/21	15	16	c518fb71-19a2-43e8-98e5-5ccd9a175fa0
202381614852	202381614852	2023	8	16	9	21	65s	2023	8	16	14	8	52	1		Seed plant	MUS_400		Angraecum sp.	orchidaceae	valid	2.95	266				0		false	5	dry/fallen fruit	3	0	0				1	main trunk	Adult	548 - 552		vegetating	65s-52/22	15	18	5e8175a1-29e6-4e52-97c9-d299fc06d1c7
202391103728	202391103728	2023	9	1	9	3	FB	2023	9	1	10	37	28	1		Seed plant	MUS_400		Angraecum sp.	orchidaceae	valid	4.12	40						false	4	ripe fruit	10	0	7				1	main trunk	Adult	101-682-87		fruiting	FB-28/1	10	51	fbb8ff13-e589-4712-85ee-d3b14b9083b4
202391103728	202391103728	2023	9	1	9	3	FB	2023	9	1	10	37	28	1		Seed plant	MUS_400		Angraecum sp.	orchidaceae	valid	4.26	296							0	vegetating	5	0	0				1	main trunk	Subadult	101-688-90		vegetating	FB-28/2	10	56	acd395b9-d369-4243-8565-98e7bfcca698
20239111530	20239111530	2023	9	1	9	3	FB	2023	9	1	11	5	30	2		Fern	zz		Microsorum scolopendria	Polypodiaceae	valid	-0.1	198	1.9	4	3.9		0.7	false	0	vegetating	3	0	0	3.5	0		1	main trunk	Subadult	101-696-700		vegetating	FB-30/1	11	35	a2686e00-31e3-4c21-960d-94e93b43ca25
20239111530	20239111530	2023	9	1	9	3	FB	2023	9	1	11	5	30	1		Seed plant	MUS_399		Angraecum pectinatum	orchidaceae	Valid	0.59	264	3	3.6	3.3	2	0.3	false	0	vegetating	9	0	0				1	main trunk	Adult	101-701-706		vegetating	FB-30/2	11	42	341fa4c1-e21b-41ec-86d7-7ec00617ce4f
20239111530	20239111530	2023	9	1	9	3	FB	2023	9	1	11	5	30	1		Seed plant	MUS_399		Angraecum pectinatum	orchidaceae	Valid	0.84	262	5.7	4.4	6	2.4	0.3	false	0	vegetating	14	0	0				1	main trunk	Adult	101-707-712		vegetating	FB-30/3	11	48	22e003c7-3a46-4040-bb59-f94d9609d2d0
20239111530	20239111530	2023	9	1	9	3	FB	2023	9	1	11	5	30	1		Seed plant	MUS_399		Angraecum pectinatum	orchidaceae	Valid	1.6	272	7.8	3.6	8.8	2.1	0.4	false	0	vegetating	16	0	0				1	main trunk	Adult	101-713-716		vegetating	FB-30/4	11	53	80533996-7320-49d9-a3b1-cce728825609
20239111530	20239111530	2023	9	1	9	3	FB	2023	9	1	11	5	30	1		Seed plant	MUS_399		Angraecum pectinatum	orchidaceae	Valid	1.71	318	2.5	3.4	3.4	1.7	0.2	false	0	vegetating	8	0	0				1	main trunk	Adult	101-717-720		vegetating	FB-30/5	11	57	8bb1eca1-d0ec-49bb-9711-b8d2592d7635
20239111530	20239111530	2023	9	1	9	3	FB	2023	9	1	11	5	30	1		Seed plant	MUS_399		Angraecum pectinatum	orchidaceae	Valid	2.49	248								vegetating	7	0	0				1	main trunk	Adult	101-721-723		vegetating	FB-30/6	11	59	e7753312-97a2-4232-997a-0927e24667f4
202391124732	202391124732	2023	9	1	9	3	FB	2023	9	1	12	47	32	2		Fern	FERN_173		Microsorum punctatum	Polypodiaceae	seedling	-0.1	120	2.1	2	1.5		0.6	false	0	vegetating	4	0	0	2.1	0		1	main trunk	Subadult	101-727-730		vegetating	FB-32/1	12	57	958354ab-72f6-4841-8655-06a08de09485
202391124732	202391124732	2023	9	1	9	3	FB	2023	9	1	12	47	32	2		Fern	FERN_173		Microsorum punctatum	Polypodiaceae	seedling	-0.07	56	1.1	1.3	1.3		0.4	false	0	vegetating	3	0	0	1.3	0		1	main trunk	Juvenile/Sapling	101-731-734		vegetating	FB-32/2	13	1	8efd4af5-5a22-4228-9738-44beb7da834b
202391124732	202391124732	2023	9	1	9	3	FB	2023	9	1	12	47	32	2		Fern	FERN_173		Microsorum punctatum	Polypodiaceae	seedling	-0.06	56	2.6	3.9	2.7		0.7	false	0	vegetating	6	0	0	3.4	0		1	main trunk	Subadult	101-735-737		vegetating	FB-32/3	13	5	3156f46a-89d7-4b10-9665-c0e9c38b00cb
202391131133	202391131133	2023	9	1	9	3	FB	2023	9	1	13	11	33	1		Seed plant	MUS_400		Angraecum sp.	orchidaceae	valid	0.43	168SE	11.2	11.7	12	10.2	1.9	false	5	dry/fallen fruit	7	0	0				1	main trunk	Adult	101-741-744		vegetating	FB-33/1	13	37	60f44716-a707-4bef-8d2f-0c952562542c
202391131133	202391131133	2023	9	1	9	3	FB	2023	9	1	13	11	33	1		Seed plant	MUS_400		Angraecum sp.	orchidaceae	valid	0.45	166SE	3.4	4.7	6	5.6	0.8	false	5	dry/fallen fruit	4	0	0				1	main trunk	Adult	101-745-749		vegetating	FB-33/2	13	50	ad2190ea-e587-4ceb-aada-155ff4c18cc0
202391131133	202391131133	2023	9	1	9	3	FB	2023	9	1	13	11	33	1		Seed plant	MUS_400		Angraecum sp.	orchidaceae	valid	1.59	160SE	1.9	1.6	1.5	1.7	0.4	false	0	vegetating	4	0	0				1	main trunk	Subadult	101-750-755		vegetating	FB-33/3	13	53	a51f9c1f-c670-424f-b695-5c87a4a87a17
2023911427191	2023911427191	2023	9	1	9	3	FB	2023	9	1	14	27	191	1		Seed plant	MUS_400		Angraecum sp.	orchidaceae	valid	0.02	134SE	1.1	1.2	0.5	0.7	0.3	false	0	vegetating	3	0	0				1	main trunk	Juvenile/Sapling	101-759-762		vegetating	FB-191/1	14	36	47775cd6-2e67-4d4f-a6b0-f57e53972abd
2023911427191	2023911427191	2023	9	1	9	3	FB	2023	9	1	14	27	191	1		Seed plant	MUS_400		Angraecum sp.	orchidaceae	valid	0.09	134SE	1.7	3.4	2.8	2.6	0.6	false	0	vegetating	3	0	0				1	main trunk	Subadult	101-763-767		vegetating	FB-191/2	14	40	7e069de0-40e9-4f86-a4ca-1829e83d05bc
2023911427191	2023911427191	2023	9	1	9	3	FB	2023	9	1	14	27	191	1		Seed plant	MUS_400		Angraecum sp.	orchidaceae	valid	0.12	154SE	2.1	1.5	1.6	1.6	0.5	false	0	vegetating	3	0	0				1	main trunk	Subadult	101-768-771		vegetating	FB-191/3	14	43	a4224202-a142-48ec-ad88-71e77c3c6362
2023911427191	2023911427191	2023	9	1	9	3	FB	2023	9	1	14	27	191	1		Seed plant	MUS_400		Angraecum sp.	orchidaceae	valid	0.16	126SE	0.5	0.9	0.4	0.7	0.2	false	0	vegetating	3	0	0				1	main trunk	Juvenile/Sapling	101-772-776		vegetating	FB-191/4	14	45	98742af8-4e54-4834-bd6a-2e003301523c
2023911427191	2023911427191	2023	9	1	9	3	FB	2023	9	1	14	27	191	1		Seed plant	MUS_400		Angraecum sp.	orchidaceae	valid	0.19	126SE	0.3	0.5	0.3	0.4	0.2	false	0	vegetating	2	0	0	0			1	main trunk	Juvenile/Sapling	101-777-779		vegetating	FB-191/5	14	49	00a3f3cb-64ef-4d3f-a0a3-f79290a00b95
2023911427191	2023911427191	2023	9	1	9	3	FB	2023	9	1	14	27	191	1		Seed plant	MUS_400		Angraecum sp.	orchidaceae	valid	0.19	122SE	0.8	2.3	0.8	1.3	0.4	false	0	vegetating	3	0	0				1	main trunk	Subadult	101-780-783		vegetating	FB-191/6	14	51	6a3a8603-d787-43bb-b736-1f1a62f0aef8
2023911427191	2023911427191	2023	9	1	9	3	FB	2023	9	1	14	27	191	1		Seed plant	MUS_400		Angraecum sp.	orchidaceae	valid	0.22	194SW	1.3	1.6	2.2	0.8	0.4	false	0	vegetating	2	0	0				1	main trunk	Subadult	101-784-787		vegetating	FB-191/7	14	53	95c745bc-c50c-4eb5-b84a-11dd743d8d2f
2023911427191	2023911427191	2023	9	1	9	3	FB	2023	9	1	14	27	191	1		Seed plant	MUS_400		Angraecum sp.	orchidaceae	valid	0.11	150SE	0.6	1.2	0.5	0.6	0.3	false	0	vegetating	4	0	0				1	main trunk	Subadult	101-788-792		vegetating	FB-191/8	14	57	956d83d1-2001-4278-a54f-94cb3286a793
2023911427191	2023911427191	2023	9	1	9	3	FB	2023	9	1	14	27	191	1		Seed plant	MUS_400		Angraecum sp.	orchidaceae	valid	0.15	236W	0.5	1.1	0.4	0.6	0.3	false	0	vegetating	2	0	0				1	main trunk	Juvenile/Sapling	101-793-796		vegetating	FB-191/9	15	0	d706800a-3922-4ded-8dd3-e4bdc8719824
2023911427191	2023911427191	2023	9	1	9	3	FB	2023	9	1	14	27	191	1		Seed plant	MUS_400		Angraecum sp.	orchidaceae	valid	0.24	236	0.8	0.8	1	0.9	0.3	false	0	vegetating	3	0	0				1	main trunk	Subadult	101-796-799		vegetating	FB-191/10	15	3	822f1449-dc0e-4990-abf7-9d39fa11c455
2023911427191	2023911427191	2023	9	1	9	3	FB	2023	9	1	14	27	191	1		Seed plant	MUS_400		Angraecum sp.	orchidaceae	valid	1.21	116	0.6	1.8	0.8	1	0.5	false	0	vegetating	3	0	0				1	main trunk	Juvenile/Sapling	101-800-803		vegetating	FB-191/11	15	6	9ebda020-f141-46ab-869a-02847578e1a7
2023911427191	2023911427191	2023	9	1	9	3	FB	2023	9	1	14	27	191	1		Seed plant	MUS_400		Angraecum sp.	orchidaceae	valid	1.24	106	1.9	2.6	1.8	1.6	0.7	false	0	vegetating	4	0	0				1	main trunk	Subadult	101-804-807		vegetating	FB-191/12	15	9	dd2a4148-b53f-4891-a363-f1afd3b3cde3
2023911427191	2023911427191	2023	9	1	9	3	FB	2023	9	1	14	27	191	1		Seed plant	MUS_400		Angraecum sp.	orchidaceae	valid	1.3	140	0.5	0.3	0.7	0.4	0.2	false	0	vegetating	1	0	0				1	main trunk	Juvenile/Sapling	101-808-810		vegetating	FB-191/13	15	13	ed0a7147-f3b2-44cf-bbbf-45be1181e503
2023911427191	2023911427191	2023	9	1	9	3	FB	2023	9	1	14	27	191	1		Seed plant	MUS_400		Angraecum sp.	orchidaceae	valid	1.36	172	0.5	0.6	0.8	0.2	0.3	false	0	vegetating	1	0	0				1	main trunk	Subadult	101-811-813		vegetating	FB-191/14	15	15	62dce0c7-d90a-493e-887c-e49759f4fc1d
2023911427191	2023911427191	2023	9	1	9	3	FB	2023	9	1	14	27	191	1		Seed plant	MUS_400		Angraecum sp.	orchidaceae	valid	1.34	280	0.9	0.5	1.6	0.7	0.4	false	0	vegetating	1	0	0				1	main trunk	Juvenile/Sapling	101-814-818			FB-191/15	15	18	306fae59-a19c-463c-993a-018f5d4d8976
2023911427191	2023911427191	2023	9	1	9	3	FB	2023	9	1	14	27	191	1		Seed plant	MUS_400		Angraecum sp.	orchidaceae	valid	2.31	320						false	0	vegetating	2	0	0				1	main trunk	Juvenile/Sapling	101-819-820		vegetating	FB-191/16	15	20	bf9e8c98-7c6e-4179-bcae-46a6929c2907
202391152869	202391152869	2023	9	1	9	3	FB	2023	9	1	15	28	69	1		Seed plant	MUS_400		Angraecum sp.	orchidaceae	valid	0.45	8N	10.9	6.8	7.4	10.1	1.5	false	5	dry/fallen fruit	6	0	0				1	main trunk	Adult	101-826-832		vegetating	FB-69/1	15	39	ba07df89-87c1-4ace-8601-184c50e0573b
2023811105418	2023811105418	2023	8	11	9	20	65s	2023	8	11	10	54	18	1		Seed plant	MUS_383		Angraecum sp.	orchidaceae	valid	2.36								0	vegetating	3	0	0				1	main trunk	Juvenile/Sapling	623	20		65s-18/35	11	38	7cf88303-eb93-4d4c-a895-34378ee67a28
2023811105418	2023811105418	2023	8	11	9	20	65s	2023	8	11	10	54	18	1		Seed plant	MUS_383		Angraecum sp.	orchidaceae	valid	2.37								0	vegetating	4	0	0				1	main trunk	Juvenile/Sapling	625	20		65s-18/36	11	42	4129429c-a14f-4ebe-9d36-8ae9adacb7fe
2023811105418	2023811105418	2023	8	11	9	20	65s	2023	8	11	10	54	18	1		Seed plant	MUS_383		Angraecum sp.	orchidaceae	valid	2.41								0	vegetating	4	0	0				1	main trunk	Juvenile/Sapling	626	20		65s-18/37	11	43	15f87890-6d55-4573-b240-57101a7af541
2023811105418	2023811105418	2023	8	11	9	20	65s	2023	8	11	10	54	18	1		Seed plant	MUS_383		Angraecum sp.	orchidaceae	valid	2.42								0	vegetating	4	0	0				1	main trunk	Juvenile/Sapling	628	20		65s-18/38	11	44	a100f566-51c8-4071-afa1-ca09a92cc634
2023811105418	2023811105418	2023	8	11	9	20	65s	2023	8	11	10	54	18	1		Seed plant	MUS_383		Angraecum sp.	orchidaceae	valid	2.42								0	vegetating	8	0	0				1	main trunk	Juvenile/Sapling	629	20		65s-18/39	11	45	551aa200-97db-4e6b-bd76-cf21a240e900
2023811105418	2023811105418	2023	8	11	9	20	65s	2023	8	11	10	54	18	1		Seed plant	MUS_383		Angraecum sp.	orchidaceae	valid	2.47								0	vegetating	4	0	0				1	main trunk	Adult	630	20		65s-18/40	11	45	ce9b148d-1085-4630-8133-d4a289cb0952
2023811105418	2023811105418	2023	8	11	9	20	65s	2023	8	11	10	54	18	1		Seed plant	MUS_383		Angraecum sp.	orchidaceae	valid	2.44								0	vegetating	4	0	0				1	main trunk	Juvenile/Sapling	632	20		65s-18/41	11	45	596098e7-a104-4f02-9f26-79a91b183cae
2023811105418	2023811105418	2023	8	11	9	20	65s	2023	8	11	10	54	18	1		Seed plant	MUS_383		Angraecum sp.	orchidaceae	valid	2.44								0	vegetating	3	0	0				1	main trunk	Juvenile/Sapling	631	20		65s-18/42	11	47	5b372f31-7e71-4b2d-b5db-48c1e62ae130
2023811105418	2023811105418	2023	8	11	9	20	65s	2023	8	11	10	54	18	1		Seed plant	MUS_383		Angraecum sp.	orchidaceae	valid	2.49					3			0	vegetating	3	0	1				1	main trunk	Adult	633	20		65s-18/43	11	47	78d0b5ec-e445-418b-9e49-1767aaa57047
2023811105418	2023811105418	2023	8	11	9	20	65s	2023	8	11	10	54	18	1		Seed plant	MUS_383		Angraecum sp.	orchidaceae	valid	2.49								0	vegetating	2	0	0				1	main trunk	Juvenile/Sapling	634	20		65s-18/44	11	49	58a1edea-08e4-4ea5-9494-a584caad21cf
2023811105418	2023811105418	2023	8	11	9	20	65s	2023	8	11	10	54	18	1		Seed plant	MUS_383		Angraecum sp.	orchidaceae	valid	2.45								0	vegetating	3	0	0				1	main trunk	Juvenile/Sapling	635	20		65s-18/45	11	49	e2f22152-6c57-47bd-a6ce-d068283f0cb4
2023811105418	2023811105418	2023	8	11	9	20	65s	2023	8	11	10	54	18	1		Seed plant	MUS_383		Angraecum sp.	orchidaceae	valid	2.49								0	vegetating	5	0	0				1	main trunk	Adult	636	20		65s-18/46	11	50	4de95dcc-b3dc-40de-9b8d-4c900c6c7802
2023811105418	2023811105418	2023	8	11	9	20	65s	2023	8	11	10	54	18	1		Seed plant	MUS_383		Angraecum sp.	orchidaceae	valid	2.52								0	vegetating	4	0	0				1	main trunk	Juvenile/Sapling	637	20		65s-18/47	11	50	5498428a-3145-4405-8999-8dc467c36d5d
2023811105418	2023811105418	2023	8	11	9	20	65s	2023	8	11	10	54	18	1		Seed plant	MUS_383		Angraecum sp.	orchidaceae	valid	2.52								0	vegetating	3	0	0				1	main trunk	Juvenile/Sapling	637	20		65s-18/48	11	51	3618bcd1-227e-4806-a54a-3fd0a6432d31
2023811105418	2023811105418	2023	8	11	9	20	65s	2023	8	11	10	54	18	1		Seed plant	MUS_383		Angraecum sp.	orchidaceae	valid	2.52								0	vegetating	3	0	0				1	main trunk	Juvenile/Sapling	637	20		65s-18/49	11	52	d80b772a-53b6-4b62-84db-b9fb48a08913
2023811105418	2023811105418	2023	8	11	9	20	65s	2023	8	11	10	54	18	1		Seed plant	MUS_383		Angraecum sp.	orchidaceae	valid	2.53								0	vegetating	3	0	0				1	main trunk	Juvenile/Sapling	638	20		65s-18/50	11	53	4302dd53-a700-4b63-ab91-55b6182bab3a
2023811105418	2023811105418	2023	8	11	9	20	65s	2023	8	11	10	54	18	1		Seed plant	MUS_383		Angraecum sp.	orchidaceae	valid	2.53								0	vegetating	4	0	0				1	main trunk	Juvenile/Sapling	638	20		65s-18/51	11	54	3dbcb610-0e5a-4ada-a716-838756e40079
2023811105418	2023811105418	2023	8	11	9	20	65s	2023	8	11	10	54	18	1		Seed plant	MUS_383		Angraecum sp.	orchidaceae	valid	2.53								0	vegetating	4	0	0				1	main trunk	Juvenile/Sapling	638	20		65s-18/52	11	54	6cd35f9c-dcf9-4c46-80d0-c5420fe7e32e
2023811105418	2023811105418	2023	8	11	9	20	65s	2023	8	11	10	54	18	1		Seed plant	MUS_383		Angraecum sp.	orchidaceae	valid	2.53								0	vegetating	2	0	0				1	main trunk	Juvenile/Sapling	638	20		65s-18/53	11	54	848cfebc-29ac-412f-81a1-5eae8fa99155
2023811105418	2023811105418	2023	8	11	9	20	65s	2023	8	11	10	54	18	1		Seed plant	MUS_383		Angraecum sp.	orchidaceae	valid	2.59								0	vegetating	3	0	0				1	main trunk	Juvenile/Sapling	639	20		65s-18/54	11	55	6aba8959-7e91-47d9-9539-bbf430911012
2023811105418	2023811105418	2023	8	11	9	20	65s	2023	8	11	10	54	18	1		Seed plant	MUS_383		Angraecum sp.	orchidaceae	valid	2.59								0	vegetating	3	0	0				1	main trunk	Juvenile/Sapling	639	20		65s-18/55	11	57	92a389f1-5993-4fef-9184-c0d0654a8b2b
2023811105418	2023811105418	2023	8	11	9	20	65s	2023	8	11	10	54	18	1		Seed plant	MUS_383		Angraecum sp.	orchidaceae	valid	2.59								0	vegetating	2	0	0				1	main trunk	Juvenile/Sapling	639	20		65s-18/56	11	57	6f4ef996-2003-48d1-9b28-18b6816915e3
2023811105418	2023811105418	2023	8	11	9	20	65s	2023	8	11	10	54	18	1		Seed plant	MUS_383		Angraecum sp.	orchidaceae	valid	2.59								0	vegetating	2	0	0				1	main trunk	Juvenile/Sapling	639	20		65s-18/57	11	58	f68af9be-549d-42cb-b287-aeb8f40ad0f0
2023811105418	2023811105418	2023	8	11	9	20	65s	2023	8	11	10	54	18	1		Seed plant	MUS_383		Angraecum sp.	orchidaceae	valid	2.59								0	vegetating	5	0	0				1	main trunk	Juvenile/Sapling	639	20		65s-18/58	11	58	55cb67db-c74c-4d9d-a730-2510db79f8f0
2023811105418	2023811105418	2023	8	11	9	20	65s	2023	8	11	10	54	18	1		Seed plant	MUS_383		Angraecum sp.	orchidaceae	valid	2.54								0	vegetating	5	0	0				1	main trunk	Adult	640	20		65s-18/59	11	59	43f817e9-7080-49c0-a564-43802c1ff012
2023811105418	2023811105418	2023	8	11	9	20	65s	2023	8	11	10	54	18	1		Seed plant	MUS_383		Angraecum sp.	orchidaceae	valid	2.69								0	vegetating	5	0	0				1	main trunk	Adult	641	20		65s-18/60	12	0	7f6cb3c4-6b19-422c-8b17-c69516e7894b
2023811105418	2023811105418	2023	8	11	9	20	65s	2023	8	11	10	54	18	1		Seed plant	MUS_383		Angraecum sp.	orchidaceae	valid	2.75								0	vegetating	2	0	0				1	main trunk	Juvenile/Sapling	642	20		65s-18/61	12	0	7c646c1b-1f5b-4687-8aba-6d8ba39943c9
2023811105418	2023811105418	2023	8	11	9	20	65s	2023	8	11	10	54	18	1		Seed plant	MUS_383		Angraecum sp.	orchidaceae	valid	2.85								0	vegetating	4	0	0				1	main trunk	Adult	643	20		65s-18/62	12	1	b6680f40-1c46-448a-bc9d-4890ad5c3e6e
2023811105418	2023811105418	2023	8	11	9	20	65s	2023	8	11	10	54	18	1		Seed plant	MUS_383		Angraecum sp.	orchidaceae	valid	2.86								0	vegetating	4	0	0				1	main trunk	Juvenile/Sapling	644	20		65s-18/63	12	2	204b5bcf-8653-4d39-93f4-856a425949f9
2023811105418	2023811105418	2023	8	11	9	20	65s	2023	8	11	10	54	18	1		Seed plant	MUS_383		Angraecum sp.	orchidaceae	valid	2.9								0	vegetating	4	0	0				1	main trunk	Juvenile/Sapling	645	20		65s-18/64	12	2	b2530246-65e6-453b-8600-1d313f56cfbb
2023811105418	2023811105418	2023	8	11	9	20	65s	2023	8	11	10	54	18	1		Seed plant	MUS_383		Angraecum sp.	orchidaceae	valid	3					5			0	vegetating	5	0	0				1	main trunk	Adult	647	20		65s-18/65	12	3	20f33823-7bd7-4abc-91b9-d251b1827bc1
2023811105418	2023811105418	2023	8	11	9	20	65s	2023	8	11	10	54	18	1		Seed plant	MUS_383		Angraecum sp.	orchidaceae	valid	3.1								0	vegetating	4	0	0				1	main trunk	Adult	648	20		65s-18/66	12	4	28bec2fe-fe3c-4abb-a22d-d74ad5623aa7
2023811105418	2023811105418	2023	8	11	9	20	65s	2023	8	11	10	54	18	1		Seed plant	MUS_383		Angraecum sp.	orchidaceae	valid	3.14								0	vegetating	5	0	0				1	main trunk	Adult	649	20		65s-18/67	12	4	3f9a8c9a-4463-487c-8182-ab42ac23b60b
2023811105418	2023811105418	2023	8	11	9	20	65s	2023	8	11	10	54	18	1		Seed plant	MUS_383		Angraecum sp.	orchidaceae	valid	2.31								0	vegetating	4	0	0				1	main trunk	Juvenile/Sapling	650	20		65s-18/68	12	10	65fdef06-099f-4c96-a1b4-5a08a72f6a31
2023811105418	2023811105418	2023	8	11	9	20	65s	2023	8	11	10	54	18	1		Seed plant	MUS_383		Angraecum sp.	orchidaceae	valid	2.37								0	vegetating	4	0	0				1	main trunk	Juvenile/Sapling	651	20		65s-18/69	12	10	0b815f7a-2941-4a5f-8cc8-686f66ad5ffd
2023811105418	2023811105418	2023	8	11	9	20	65s	2023	8	11	10	54	18	1		Seed plant	MUS_383		Angraecum sp.	orchidaceae	valid	2.47								0	vegetating	4	0	0				1	main trunk	Juvenile/Sapling	652	20		65s-18/70	12	11	1f2763e0-e5d1-4243-8843-816d359d247a
2023811105418	2023811105418	2023	8	11	9	20	65s	2023	8	11	10	54	18	1		Seed plant	MUS_383		Angraecum sp.	orchidaceae	valid	2.47								0	vegetating	3	0	0				1	main trunk	Juvenile/Sapling	652	20		65s-18/71	12	11	692356b9-1dae-458d-aa0d-714e14f3f549
2023811105418	2023811105418	2023	8	11	9	20	65s	2023	8	11	10	54	18	1		Seed plant	MUS_383		Angraecum sp.	orchidaceae	valid	2.51								0	vegetating	4	0	0				1	main trunk	Adult	653	20		65s-18/72	12	12	524c0d73-db7e-4fd1-ba5b-05bf6dd580c7
2023811105418	2023811105418	2023	8	11	9	20	65s	2023	8	11	10	54	18	1		Seed plant	MUS_383		Angraecum sp.	orchidaceae	valid	3.1								0	vegetating	0	0	0				1	main trunk			Number of leaf and fruit unknown		65s-18/73	12	12	a587c320-1ca4-4af5-aab0-70f0092f3925
2023914106192	2023914106192	2023	9	14	9	52	65s	2023	9	14	10	6	192	1		Seed plant	MUS_397		Angraecum pectinatum	orchidaceae	Valid	0.12	86	4.4	5.5	4	1.5	0.4	false	0	vegetating	2	0	0				1	main trunk	Adult	101-833-835		vegetating	65s-192/1	10	21	ac8dc3e2-c7b5-455e-88e3-16e336aa9c32
2023914106192	2023914106192	2023	9	14	9	52	65s	2023	9	14	10	6	192	1		Seed plant	MUS_383		Angraecum sp.	orchidaceae	Valid	2.06	326						false	0	vegetating	2	0	0				2	crown	Juvenile/Sapling	101-836-838			65s-192/2	10	25	32868f85-bdfd-4aec-82d4-9772bc05a2bc
2023914106192	2023914106192	2023	9	14	9	52	65s	2023	9	14	10	6	192	1		Seed plant	MUS_383		Angraecum sp.	orchidaceae	Valid	2.05	230						false	0	vegetating	4	0	0				2	crown	Juvenile/Sapling	101-839-841		vegetating	65s-192/3	10	29	35ea3271-163e-464a-a284-b564f253adcb
2023914106192	2023914106192	2023	9	14	9	52	65s	2023	9	14	10	6	192	1		Seed plant	MUS_383		Angraecum sp.	orchidaceae	Valid	3.06	50								vegetating	9	0	0				1	main trunk	Adult	101-842-844		vegetating	65s-192/4	10	31	449086c2-eb45-4649-8444-116129fa0e21
2023914106192	2023914106192	2023	9	14	9	52	65s	2023	9	14	10	6	192	1		Seed plant	MUS_383		Angraecum sp.	orchidaceae	Valid	2.95	100								vegetating	6	0	0				2	crown	Adult	101-844-846		vegetating	65s-192/5	10	35	58d0ee54-bf74-4551-9004-8790521e444d
2023914106192	2023914106192	2023	9	14	9	52	65s	2023	9	14	10	6	192	1		Seed plant	MUS_383		Angraecum sp.	orchidaceae	Valid	2.9	106						false	0	vegetating	4	0	0				2	crown	Juvenile/Sapling	101-847-849	Further left on picture	vegetating	65s-192/6	10	38	8cd23501-5a0f-4f4c-ade1-c6e000dd0eae
2023914106192	2023914106192	2023	9	14	9	52	65s	2023	9	14	10	6	192	1		Seed plant	MUS_383		Angraecum sp.	orchidaceae	Valid	2.9	106						false	0	vegetating	2	0	0				2	crown	Juvenile/Sapling	101-847-849	Right on picture	vegetating	65s-192/7	10	40	741f1676-7c6e-4f98-91e0-6e7b6b841fab
2023914106192	2023914106192	2023	9	14	9	52	65s	2023	9	14	10	6	192	1		Seed plant	MUS_383		Angraecum sp.	orchidaceae	Valid	2.95	64						false	0	vegetating	5	0	0				2	crown	Subadult	101-850-851		vegetating	65s-192/8	10	42	aac9e80e-9044-4623-a896-de55573430aa
2023914106192	2023914106192	2023	9	14	9	52	65s	2023	9	14	10	6	192	1		Seed plant	MUS_383		Angraecum sp.	orchidaceae	Valid	3	38						false	0	vegetating	5	0	0				2	crown	Subadult	101-852-854		vegetating	65s-192/9	10	43	570f806a-cb53-41a6-aa62-dffcda7b8806
2023914106192	2023914106192	2023	9	14	9	52	65s	2023	9	14	10	6	192	1		Seed plant	MUS_383		Angraecum sp.	orchidaceae	Valid	3	38						false	0	vegetating	20	0	0				2	crown	Juvenile/Sapling	101-855-856		vegetating	65s-192/10	10	47	e62423ab-8354-4c9c-9d46-0b4ee34ffe39
2023914106192	2023914106192	2023	9	14	9	52	65s	2023	9	14	10	6	192	1		Seed plant	MUS_383		Angraecum sp.	orchidaceae	Valid	3.06	144							5	dry/fallen fruit	4	0	0				2	crown	Adult	101-857-861		vegetating	65s-192/11	10	48	509cafa9-7094-4e69-92a4-bcd43f99af34
20239141129194	20239141129194	2023	9	14	9	52	65s	2023	9	14	11	29	194	1		Seed plant	MUS_397		Angraecum pectinatum	orchidaceae	Valid	0.05	210	1	2.6	1.7	1.6	0.2	false	0	vegetating	4	0	0				1	main trunk	Subadult	101-885-885		vegetating	65s-194/2	12	4	01a5a6ef-f2f2-4694-94dd-ecd33d90f60c
20239141129194	20239141129194	2023	9	14	9	52	65s	2023	9	14	11	29	194	1		Seed plant	MUS_397		Angraecum pectinatum	orchidaceae	Valid	0.05	182	5	2	7.1	1.7	0.4	false	0	vegetating	13	0	0				1	main trunk	Adult	101-886		vegetating	65s-194/3	12	9	deec3dbb-4478-4e3f-afa0-fc0e4f7fb122
20239141129194	20239141129194	2023	9	14	9	52	65s	2023	9	14	11	29	194	1		Seed plant	MUS_397		Angraecum pectinatum	orchidaceae	Valid	0.05	198	2.7	2	3.9	1.6	0.3	false	0	vegetating	6	0	0				1	main trunk	Adult	101-887		vegetating	65s-194/4	12	12	a8f5c402-4de1-45ba-be24-21e529ee4c5b
20239141129194	20239141129194	2023	9	14	9	52	65s	2023	9	14	11	29	194	2		Fern	FERN_175		Microsorum scolopendria	Polypodiaceae	valid	0.08	256	1.6	2.5	2.1		0.4	false	0	vegetating				2.4	0	0.3	1	main trunk	Juvenile/Sapling	101-888-892		vegetating	65s-194/5	12	14	07640b55-0d37-4dc7-b6ff-c2b96a63e213
20239141129194	20239141129194	2023	9	14	9	52	65s	2023	9	14	11	29	194	1		Seed plant	MUS_400		Angraecum pectinatum	orchidaceae	Valid	0	280	3.8	3.2	4.9	3.9	0.4	false	0	vegetating	2	0	0				1	main trunk	Subadult	101-895-896		vegetating	65s-194/6	12	18	4fb4c99d-8761-4072-9091-2823d380615f
20239141129194	20239141129194	2023	9	14	9	52	65s	2023	9	14	11	29	194	1		Seed plant	MUS_400		Angraecum pectinatum	orchidaceae	Valid	0.06	312	1.7	2.9	7.1	2.2	0.5	false	0	vegetating	4	0	0				1	main trunk	Adult	101-897-900		vegetating	65s-194/7	12	23	2b95977c-9f58-4fb8-adb6-a741865759a0
20239141129194	20239141129194	2023	9	14	9	52	65s	2023	9	14	11	29	194	1		Seed plant	MUS_397		Angraecum pectinatum	orchidaceae	Valid	0.06	240	3.1	4.4	4.4	2	0.3	false	0	vegetating	12	0	0				1	main trunk	Adult	101-901-902		vegetating	65s-194/8	12	27	a8423cca-1642-480e-a63e-9bdd36d9afa2
20239141129194	20239141129194	2023	9	14	9	52	65s	2023	9	14	11	29	194	1		Seed plant	MUS_400		Angraecum mauritianum	orchidaceae	Valid	0.08	16	6.7	9.9	8.2	6.4	0.7	false	0	vegetating	5	0	0				1	main trunk	Adult	101-903-905		vegetating	65s-194/9	12	30	4cf54fae-e29f-4d51-9b11-95cd557740d1
20239141129194	20239141129194	2023	9	14	9	52	65s	2023	9	14	11	29	194	1		Seed plant	MUS_400		Angraecum mauritianum	orchidaceae	Valid	0.34	356	3.5	10.2	5.3	5	0.5	true	0	vegetating	4	0	0				1	main trunk	Adult	101-906-909		vegetating	65s-194/10	12	35	7b47031b-12cb-41be-a6d4-764194a35ad9
20239141129194	20239141129194	2023	9	14	9	52	65s	2023	9	14	11	29	194	1		Seed plant	MUS_397		Angraecum pectinatum	orchidaceae	Valid	0.54	310	2.1	3.7	2.8	2.1	0.3	false	0	vegetating	8	0	0				1	main trunk	Adult	101-910-911		vegetating	65s-194/11	13	3	caf96cda-bb90-4b75-8cad-546b05ab75db
20239141129194	20239141129194	2023	9	14	9	52	65s	2023	9	14	11	29	194	1		Seed plant	MUS_397		Angraecum pectinatum	orchidaceae	Valid	0.64	28	8.3	5.7	4.8	2.4	0.3	false	0	vegetating	8	0	0				1	main trunk	Adult	101-912-913		vegetating	65s-194/12	13	6	caf6abae-6a83-4782-a1dc-56579b16dca4
20239141129194	20239141129194	2023	9	14	9	52	65s	2023	9	14	11	29	194	1		Seed plant	MUS_383		Angraecum sp.	orchidaceae	Valid	1	180	3.4	0.9	1.4	2.5	0.7	false	0	vegetating	3	0	0				1	main trunk	Subadult	101-914-915	Leaves eaten	vegetating	65s-194/13	13	10	2699172d-7594-4961-ac5c-a459719e23c4
20239141129194	20239141129194	2023	9	14	9	52	65s	2023	9	14	11	29	194	1		Seed plant	MUS_383		Angraecum sp.	orchidaceae	Valid	1.1	262	2.8	4.5	3	2.8	0.7	false	0	vegetating	5	0	0				1	main trunk	Subadult	101-917-919		vegetating	65s-194/14	13	16	710e3b45-d73e-4872-bcd3-105f0939a0b8
20239141129194	20239141129194	2023	9	14	9	52	65s	2023	9	14	11	29	194	1		Seed plant	MUS_383		Angraecum sp.	orchidaceae	Valid	1.1	246	1	2.2	1.8	1.6	0.4	false	0	vegetating	3	0	0				1	main trunk	Subadult	101-920-922		vegetating	65s-194/15	13	19	84968710-d600-4448-a3fc-8edac9b50e0f
20239141129194	20239141129194	2023	9	14	9	52	65s	2023	9	14	11	29	194	1		Seed plant	MUS_383		Angraecum sp.	orchidaceae	Valid	1.12	262	0.9	1.8	1.8	1.5	0.4	false	0	vegetating	4	0	0				1	main trunk	Subadult	101-923-924		vegetating	65s-194/16	13	22	6f206eba-cd46-4163-9a8c-7c516fa32836
20239141129194	20239141129194	2023	9	14	9	52	65s	2023	9	14	11	29	194	1		Seed plant	MUS_383		Angraecum sp.	orchidaceae	Valid	1.14	254	0.7	1.4	1.6	1.3	0.3	false	0	vegetating	3	0	0				1	main trunk	Juvenile/Sapling	101-925-927		vegetating	65s-194/17	13	24	dd297f0e-e48b-4831-a058-495bbbf4c376
20239141129194	20239141129194	2023	9	14	9	52	65s	2023	9	14	11	29	194	1		Seed plant	MUS_383		Angraecum sp.	orchidaceae	Valid		262	0.7	0.7	0.3	0.7	0.2	false	0	vegetating	3	0	0				1	main trunk	Juvenile/Sapling	101-928-930		vegetating	65s-194/18	13	27	118ff574-6ac5-4172-b0e5-cd5509edab81
20239141129194	20239141129194	2023	9	14	9	52	65s	2023	9	14	11	29	194	1		Seed plant	MUS_383		Angraecum sp.	orchidaceae	Valid	1.05	160	0.5	0.4	0.4	0.5	0.1	false	0	vegetating	2	0	0				1	main trunk	Juvenile/Sapling	101-931		vegetating	65s-194/19	13	28	0337da25-e2f7-465e-9f55-345309fc2020
20239141129194	20239141129194	2023	9	14	9	52	65s	2023	9	14	11	29	194	1		Seed plant	MUS_383		Angraecum sp.	orchidaceae	Valid	1.06	160	0.5	0.7	0.5	0.7	0.4	false	0	vegetating	2	0	0				1	main trunk	Juvenile/Sapling	101-932-933		vegetating	65s-194/20	13	31	2bebe9ef-97b8-4b20-874d-f7f284805d3a
20239141129194	20239141129194	2023	9	14	9	52	65s	2023	9	14	11	29	194	1		Seed plant	MUS_383	to confirm	Angraecum sp.	orchidaceae	Valid	1.13	180	1.4	0.9	0.6	1.1	0.4	false	0	vegetating	4	0	0				1	main trunk	Juvenile/Sapling	101-934-935		vegetating	65s-194/21	13	33	ee30476c-a2b0-4b94-807b-ddf13b8bbedd
20239141129194	20239141129194	2023	9	14	9	52	65s	2023	9	14	11	29	194	1		Seed plant	MUS_383	to confirm	Angraecum sp.	orchidaceae	Valid	1.14	180	0.7	0.9	0.4	0.8	0.3	false	0	vegetating	3	0	0				1	main trunk	Juvenile/Sapling	101-936-939		vegetating	65s-194/22	13	35	6bd002e9-726e-4644-a245-2c19509488b2
20239141129194	20239141129194	2023	9	14	9	52	65s	2023	9	14	11	29	194	1		Seed plant	MUS_460		Polystachia mauritiana s.l.	orchidaceae	Valid	130	166	1.6	1.4	1.3	0.6	0.3	false	0	vegetating	1	0	0				1	main trunk	Subadult	101-940-942	Leaves are eaten	vegetating	65s-194/23	13	37	91187f2a-72cc-4392-8dfa-dab4fa69f277
20239141129194	20239141129194	2023	9	14	9	52	65s	2023	9	14	11	29	194	1		Seed plant	MUS_460		Polystachia mauritiana s.l.	orchidaceae	Valid	1.44	150	2.2	2.7	3.8	3.2	0.5	false	0	vegetating	4	0	0				1	main trunk	Adult	101-943-946		vegetating	65s-194/24	13	41	8d845de8-4613-4092-9f61-0893fe071bdc
20239141129194	20239141129194	2023	9	14	9	52	65s	2023	9	14	11	29	194	2		Fern	FERN_175		Microsorum scolopendria	Polypodiaceae	Valid	1.44	152	150								10			15.3	2	0.7	1	main trunk	Adult	101-947-949	Width: 17.4	reproducing	65s-194/25	13	43	da8b91f6-b503-4c8f-a96a-56e4b118af5d
20239141129194	20239141129194	2023	9	14	9	52	65s	2023	9	14	11	29	194	1		Seed plant	MUS_460		Polystachia mauritiana s.l.	orchidaceae	Valid	1.44	234	1.8	2.3	2.2	2.3	0.9	false	0	vegetating	2	0	0				1	main trunk	Adult	101-950-953		vegetating	65s-194/26	13	49	9b5a381a-4669-4d9e-8b3c-fb86a2c3b21e
20239141129194	20239141129194	2023	9	14	9	52	65s	2023	9	14	11	29	194	1		Seed plant	MUS_419	to confirm	Bulbophyllum cf. incurvum	orchidaceae	valid	2.51	236	7	8.3	3.6	2.9	1.1	false	5	dry/fallen fruit	9	0	0				1	main trunk	Adult	101-954-958		vegetating	65s-194/27	13	53	011533b9-4c01-48bd-b407-082a6392e834
20239141129194	20239141129194	2023	9	14	9	52	65s	2023	9	14	11	29	194	1		Seed plant	MUS_419	to confirm	Bulbophyllum cf. incurvum	orchidaceae	valid	2.6	234	5.6	10.6	2.3	2.7	1.6	false	4	ripe fruit	7	0	2				1	main trunk	Adult	101-959-963		fruiting	65s-194/28	13	58	35ffa815-9ad8-4b13-9a28-075edf3a2302
20239151011100	20239151011100	2023	9	15	9	59	65s	2023	9	15	10	11	100	1		Seed plant	MUS_460		Polystachia mauritiana s.l.	orchidaceae	valid	0.03	180	1.4	3.3	1.1	1.8	0.7	false	0	vegetating	3	0	0				1	main trunk	Subadult	101-967-970		vegetating	65s-100/1	10	34	4ec26892-5dd9-40a7-8cbc-3d94d863adfd
20239151011100	20239151011100	2023	9	15	9	59	65s	2023	9	15	10	11	100	1		Seed plant	MUS_460		Polystachia mauritiana s.l.	orchidaceae	valid	0.07	180	3.77	2.8	1.4	2	0.7	false	0	vegetating	5	0	0				1	main trunk	Subadult	101-971-973		vegetating	65s-100/2	10	46	eec48368-1cbc-4e00-9943-e8a86b4da2df
202391511412	202391511412	2023	9	15	9	59	65s	2023	9	15	11	4	12	2		Fern	zz		Microsorum scolopendria	Polypodiaceae	Valid	0.04	314	31				2.3	false	0	vegetating	12	0	0	13	0	0.8	1	main trunk	Senescent	976-977	Dead		65s-12/1	11	16	6927539e-7b6c-4f4a-adff-14cfe34d2e50
202391511412	202391511412	2023	9	15	9	59	65s	2023	9	15	11	4	12	2		Fern	zz	unknown	Microsorum punctatum	Polypodiaceae	seedling	0.13	42	1.2	1.3	1.2		0.4	false	0	vegetating	8	0	0	0.8	0		1	main trunk	Juvenile/Sapling	978-982		vegetating	65s-12/2	11	25	00ce5bab-bf71-4017-9ecd-7deb8152dbff
202391511412	202391511412	2023	9	15	9	59	65s	2023	9	15	11	4	12	2		Fern	FERN_175		Microsorum punctatum	Polypodiaceae	seedling	0.01	234	1.7	6.1	1.9		0.7	false	0	vegetating	4			3.6	0	0.1	1	main trunk	Juvenile/Sapling	987-991		vegetating	65s-12/4	11	38	4f5d8efe-48f8-42fb-bfd7-5aa0d8a82b8a
2023915115614	2023915115614	2023	9	15	9	59	65s	2023	9	15	11	56	14	1		Seed plant	MUS_383		Angraecum sp.	orchidaceae	valid	4.93	14						false	4	ripe fruit	5		2				1	main trunk	Adult	996-997		fruiting	65s-14/1	12	10	1a4c41dd-527f-4eee-911c-8ef569ac72ec
202391513715	202391513715	2023	9	15	9	59	65s	2023	9	15	13	7	15	1		Seed plant	MUS_383		Angraecum sp.	orchidaceae	valid	1.82	116	1.1	1.9	2.4	1.9	0.5	false	0	vegetating	4						1	main trunk	Juvenile/Sapling	1020013-0015		vegetating	65s-15/1	13	22	ef34727f-0b8c-4f40-8706-2f4ef83b5366
202391513715	202391513715	2023	9	15	9	59	65s	2023	9	15	13	7	15	1		Seed plant	MUS_383		Angraecum sp.	orchidaceae	valid	1.88	220	84	6.1	9	6.1	0.8	false	3	unripe fruit	4	0	2				1	main trunk	Adult	1020016-20		fruiting	65s-15/2	13	25	5a00d102-2fd4-4e80-997f-2ecd2474b3d3
202391513715	202391513715	2023	9	15	9	59	65s	2023	9	15	13	7	15	1		Seed plant	MUS_383		Angraecum sp.	orchidaceae	valid	2.04	270	2.1	4	4.1	3.6	0.6	false	0	vegetating	4						1	main trunk	Subadult	10221-23		vegetating	65s-15/3	13	29	2767eaa9-97f0-4679-8699-b8eae83cdd03
202391513715	202391513715	2023	9	15	9	59	65s	2023	9	15	13	7	15	1		Seed plant	MUS_383		Angraecum sp.	orchidaceae	valid	2.07	80	0.6	1.4	0.5	0.7	0.3	false	0	vegetating	4						1	main trunk	Juvenile/Sapling	10224-27		vegetating	65s-15/4	13	33	ff1a148a-60fb-41d3-8048-d0076bb1a5cc
2023919114423	2023919114423	2023	9	19	9	26	65s	2023	9	19	11	44	23	1		Seed plant	MUS_397		Angraecum pectinatum	orchidaceae	Valid	0.07	0	3.2	3.6	3.9	1.8	0.3	false	0	vegetating	11	0	0				1	main trunk	Adult	1020058-60		vegetating	65s-23/1	12	5	23cec1cc-867b-4e3e-b243-197cb5f9d203
2023919114423	2023919114423	2023	9	19	9	26	65s	2023	9	19	11	44	23	1		Seed plant	MUS_397		Angraecum pectinatum	orchidaceae	Valid	0	200	2.2	5.5	4	1.1	0.3	false	0	vegetating	3	0	0				1	main trunk	Adult	1020061-63		vegetating	65s-23/2	12	9	d967c62f-4d24-439d-9124-f07834a5944d
2023919114423	2023919114423	2023	9	19	9	26	65s	2023	9	19	11	44	23	1		Seed plant	MUS_383		Angraecum sp.	orchidaceae	Valid	3.86	46						false	0	vegetating	4	0	0				1	main trunk	Juvenile/Sapling	1020064-65		vegetating	65s-23/3	12	12	2bf7ebae-6744-4b5c-b5ed-81ebf7f3083e
2023919132549	2023919132549	2023	9	19	9	26	65s	2023	9	19	13	25	49	2		Fern	FERN_175		Microsorum punctatum	Polypodiaceae	seedling	0.52	274	1.3	3.3	2.1		0.3	false	0	vegetating	8			2.1		0.3	1	main trunk	Juvenile/Sapling	1020072-76		vegetating	65s-49/1	13	36	89828bbc-5429-4b59-88cf-3ef3d3d5977d
2023919134722	2023919134722	2023	9	19	9	26	65s	2023	9	19	13	47	22	1		Seed plant	MUS_460		Polystachia mauritiana s.l.	orchidaceae	Valid	0.41	228	1.7	5.2	3.7	3.5	1	false	0	vegetating	4	0	0				1	main trunk	Subadult	102-83-85		vegetating	65s-22/1	9	29	def0b90e-4e32-42da-ad75-a6e15e6f5851
2023919134722	2023919134722	2023	9	19	9	26	65s	2023	9	19	13	47	22	1		Seed plant	MUS_460		Polystachia mauritiana s.l.	orchidaceae	Valid	0.48	298	0.4	0.5	0.4	0.7	0.3	false	0	vegetating	1	8	0				1	main trunk	Juvenile/Sapling	102-86-91		vegetating	65s-22/2	9	34	6d77b413-9f37-4a3a-b804-6029b6a3c10d
2023919134722	2023919134722	2023	9	19	9	26	65s	2023	9	19	13	47	22	1		Seed plant	MUS_460		Polystachia mauritiana s.l.	orchidaceae	Valid	0.52	292	0.4	0.9	0.6	0.9	0.3	false	0	vegetating	1	0	0				1	main trunk	Juvenile/Sapling	102-92-96		vegetating	65s-22/3	9	40	66cb8e2a-e767-4895-991b-22cfdd0d73c3
2023919134722	2023919134722	2023	9	19	9	26	65s	2023	9	19	13	47	22	1		Seed plant	MUS_460		Polystachia mauritiana s.l.	orchidaceae	Valid	0.57	284	0.8	2.2	1.8	2.1	0.5	false	0	vegetating	3	0	0	0	0		1	main trunk	Subadult	102-97-100		vegetating	65s-22/4	9	43	88023046-d991-4a4d-9434-469f9a027035
2023919134722	2023919134722	2023	9	19	9	26	65s	2023	9	19	13	47	22	1		Seed plant	MUS_460		Polystachia mauritiana s.l.	orchidaceae	Valid	0.51	56	3.4	2.1	1	2.7	1	false	0	vegetating	2	0	0				1	main trunk	Subadult	102-101-104		vegetating	65s-22/5	9	45	3b1fa792-74c4-4c0b-bf40-7782a914b348
2023919134722	2023919134722	2023	9	19	9	26	65s	2023	9	19	13	47	22	1		Seed plant	MUS_460		Polystachia mauritiana s.l.	orchidaceae	Valid	0.68	56	2.4	2.7	1.8	2.5	0.6	false	0	vegetating	5	0	0				1	main trunk	Subadult	102-105-107	One leaf half eaten	vegetating	65s-22/6	9	48	eb8d4a46-b8d0-4233-bcc8-830fdf57c973
2023919134722	2023919134722	2023	9	19	9	26	65s	2023	9	19	13	47	22	1		Seed plant	MUS_460		Polystachia mauritiana s.l.	orchidaceae	Valid	0.69	294	2.1	2.6	1.9	1.7	0.6	false	0	vegetating	5	0	0				1	main trunk	Subadult	102-108-110		vegetating	65s-22/7	9	51	9affb76c-3344-49d0-b004-1877cbbd3ae3
2023919134722	2023919134722	2023	9	19	9	26	65s	2023	9	19	13	47	22	1		Seed plant	MUS_460		Polystachia mauritiana s.l.	orchidaceae	Valid	0.76	60	3.7	2.5	2	2.4	1	false	0	vegetating	3	0	0				1	main trunk	Subadult	102-111-113		vegetating	65s-22/8	9	53	15adc181-5bf5-42ea-82b2-9ff6bdd51477
2023919134722	2023919134722	2023	9	19	9	26	65s	2023	9	19	13	47	22	1		Seed plant	MUS_460		Polystachia mauritiana s.l.	orchidaceae	Valid	0.76	192	2.6	2.7	1.3	2	0.6	false	0	vegetating	3	0	0				1	main trunk	Subadult	102-114-117		vegetating	65s-22/9	9	55	e6288d44-34e4-4088-8fdf-6ea2d246c359
2023919134722	2023919134722	2023	9	19	9	26	65s	2023	9	19	13	47	22	1		Seed plant	MUS_460		Polystachia mauritiana s.l.	orchidaceae	Valid	0.78	308	0.4	0.7	0.3	0.4	0.1	false	0	vegetating	3	0	0				1	main trunk	Juvenile/Sapling	102-118-121		vegetating	65s-22/10	9	58	38d71207-c496-4505-961f-4763dca07078
2023919134722	2023919134722	2023	9	19	9	26	65s	2023	9	19	13	47	22	1		Seed plant	MUS_460		Polystachia mauritiana s.l.	orchidaceae	Valid	0.82	16	0.7	1.8	0.8	1.7	0.5	false	0	vegetating	3	0	0				1	main trunk	Juvenile/Sapling	102-122-127		vegetating	65s-22/11	10	3	0870a0f6-0753-4d39-b09a-d348642ef0bd
2023919134722	2023919134722	2023	9	19	9	26	65s	2023	9	19	13	47	22	1		Seed plant	MUS_460		Polystachia mauritiana s.l.	orchidaceae	Valid	0.87	60	3.5	4	2.8	3	0.7	false	0	vegetating	3	0	0				1	main trunk	Subadult	102-128-130		vegetating	65s-22/12	10	6	ba5b24c9-7c83-45f2-8627-19e5e24d4fef
2023919134722	2023919134722	2023	9	19	9	26	65s	2023	9	19	13	47	22	1		Seed plant	MUS_460		Polystachia mauritiana s.l.	orchidaceae	Valid	0.84	240	0.5	0.7	0.4	0.7	0.3	false	0	vegetating	1	0	0				1	main trunk	Juvenile/Sapling	102-131-134		vegetating	65s-22/13	10	8	810afe33-4b83-46ec-a5f0-2cca409cf987
2023919134722	2023919134722	2023	9	19	9	26	65s	2023	9	19	13	47	22	1		Seed plant	MUS_460		Polystachia mauritiana s.l.	orchidaceae	Valid	0.86	240	0.7	1.7	0.8	1.1	0.4	false	0	vegetating	2	0	0				1	main trunk	Juvenile/Sapling	102-135-137		vegetating	65s-22/14	10	12	b84a8083-01db-4b93-8533-76b189387356
2023919134722	2023919134722	2023	9	19	9	26	65s	2023	9	19	13	47	22	1		Seed plant	MUS_460		Polystachia mauritiana s.l.	orchidaceae	Valid	0.91	202	0.2	0.4	0.2	0.2	0.1	false	0	vegetating	2	0	0				1	main trunk	Juvenile/Sapling	102-139-141		vegetating	65s-22/15	10	14	bed10303-0fdf-4f94-a245-41e13631893e
2023919134722	2023919134722	2023	9	19	9	26	65s	2023	9	19	13	47	22	1		Seed plant	MUS_460		Polystachia mauritiana s.l.	orchidaceae	Valid	0.92	202	0.6	0.8	0.5	0.9	0.3	false	0	vegetating	1	0	0				1	main trunk	Juvenile/Sapling	102-142-144		vegetating	65s-22/16	10	18	f979b8fc-0df7-4f4b-a537-b652f2974aff
2023919134722	2023919134722	2023	9	19	9	26	65s	2023	9	19	13	47	22	1		Seed plant	MUS_460		Polystachia mauritiana s.l.	orchidaceae	Valid	0.97	124	3.5	2.4	2.5	2.7	0.7	false	0	vegetating	3	0	0				1	main trunk	Subadult	102-145-147		vegetating	65s-22/17	10	20	da596e83-e828-4ff1-a38c-98f9caf47cd5
2023919134722	2023919134722	2023	9	19	9	26	65s	2023	9	19	13	47	22	1		Seed plant	MUS_400		Polystachia mauritiana s.l.	orchidaceae	Valid	0.95	284	1.6	1.1	1.3	1.2	0.3	false	0	vegetating	3	0	0				1	main trunk	Juvenile/Sapling	102-149-151		vegetating	65s-22/18	10	22	eb9444bf-914f-4aa7-9c46-dd561e9f96e2
2023919134722	2023919134722	2023	9	19	9	26	65s	2023	9	19	13	47	22	1		Seed plant	MUS_400		Polystachia mauritiana s.l.	orchidaceae	Valid	0.96	284	0.8	0.8	0.9	0.7	0.5	false	0	vegetating	2	0	0				1	main trunk	Juvenile/Sapling	102-152-154		vegetating	65s-22/19	10	27	c846e9d7-10b9-4b62-857a-5b654cd540f6
2023919134722	2023919134722	2023	9	19	9	26	65s	2023	9	19	13	47	22	1		Seed plant	MUS_400		Polystachia mauritiana s.l.	orchidaceae	Valid	0.96	284	1	0.7	0.7	0.9	0.4	false	0	vegetating	2	0	0				1	main trunk	Juvenile/Sapling	102-155-158		vegetating	65s-22/20	10	29	714cb999-c9e5-42e7-93fb-1323ef9c79bf
2023919134722	2023919134722	2023	9	19	9	26	65s	2023	9	19	13	47	22	1		Seed plant	MUS_400		Polystachia mauritiana s.l.	orchidaceae	Valid	0.98	284	0.2	0.8	0.3	0.3	0.2	false	0	vegetating	2	0	0				1	main trunk	Juvenile/Sapling	102-159-161		vegetating	65s-22/21	10	32	69846cca-ae23-4f27-888e-e50f12d761e3
2023919134722	2023919134722	2023	9	19	9	26	65s	2023	9	19	13	47	22	1		Seed plant	MUS_460		Polystachia mauritiana s.l.	orchidaceae	Valid	0.98	24	5.2	6.5	2.7	3	0.9	false	0	vegetating	4	0	0				1	main trunk	Subadult	102-162-164		vegetating	65s-22/22	10	35	096ea001-4281-4e07-b945-05d31c3473fd
2023919134722	2023919134722	2023	9	19	9	26	65s	2023	9	19	13	47	22	1		Seed plant	MUS_460		Polystachia mauritiana s.l.	orchidaceae	Valid	1.02	100	2.7	2.8	2	2.6	0.7	false	0	vegetating	4	0	0				1	main trunk	Subadult	102-165-167		vegetating	65s-22/23	10	37	675f2f4c-4465-4412-8958-f0d5a3531fc6
2023919134722	2023919134722	2023	9	19	9	26	65s	2023	9	19	13	47	22	1		Seed plant	MUS_400		Polystachia mauritiana s.l.	orchidaceae	Valid	1.03	230	0.4	0.6	0.3	0.8	0.3	false	0	vegetating	1	0	0				1	main trunk	Juvenile/Sapling	102-168-170		vegetating	65s-22/24	10	41	e56a75e5-157c-4acf-9985-5c8b699a1afd
2023919134722	2023919134722	2023	9	19	9	26	65s	2023	9	19	13	47	22	1		Seed plant	MUS_400		Polystachia mauritiana s.l.	orchidaceae	Valid	1.06	250	0.7	1.2	0.8	0.8	0.2	false	0	vegetating	2	0	0				1	main trunk	Juvenile/Sapling	102-171-174		vegetating	65s-22/25	10	46	5ae151ea-e199-4591-9004-4046e506f06a
2023919134722	2023919134722	2023	9	19	9	26	65s	2023	9	19	13	47	22	1		Seed plant	MUS_400		Polystachia mauritiana s.l.	orchidaceae	Valid	1.06	250	0.5	0.8	0.3	0.4	0.2	false	0	vegetating	3	0	0				1	main trunk	Juvenile/Sapling	102-175-176		vegetating	65s-22/26	10	48	aac12cc9-9e45-4130-9eed-e4c294b5707e
2023919134722	2023919134722	2023	9	19	9	26	65s	2023	9	19	13	47	22	1		Seed plant	MUS_383		Polystachia mauritiana s.l.	orchidaceae	Valid	1.08	270	0.7	2.4	0.8	1.6	0.5	false	0	vegetating	3	0	0				1	main trunk	Juvenile/Sapling	102-177-179		vegetating	65s-22/27	10	50	8e41acd2-e5a9-4bb6-a956-bccc80ba1ede
2023919134722	2023919134722	2023	9	19	9	26	65s	2023	9	19	13	47	22	1		Seed plant	MUS_383		Polystachia mauritiana s.l.	orchidaceae	Valid	1.08	282	0.5	0.7	0.3	0.6	0.2	false	0	vegetating	2	0	0				1	main trunk	Juvenile/Sapling	102-180-182		vegetating	65s-22/28	10	54	cce5d697-e279-4919-abc3-32a521bf2f05
2023919134722	2023919134722	2023	9	19	9	26	65s	2023	9	19	13	47	22	1		Seed plant	MUS_383		Polystachia mauritiana s.l.	orchidaceae	Valid	1.11	272	0.7	0.9	0.4	0.6	0.3	false	0	vegetating	2	0	0				1	main trunk	Juvenile/Sapling	102-183-186		vegetating	65s-22/29	10	56	cb5032ae-6f75-481f-80a5-4319916411af
2023919134722	2023919134722	2023	9	19	9	26	65s	2023	9	19	13	47	22	1		Seed plant	MUS_460		Polystachia mauritiana s.l.	orchidaceae	Valid	1.11	216	1.2	1.3	0.7	1.1	0.3	false	0	vegetating	4	0	0				1	main trunk	Juvenile/Sapling	102-187-190		vegetating	65s-22/30	10	58	00f083a6-5478-4969-bb48-0d94ef3b0373
2023921111548	2023921111548	2023	9	19	9	26	65s	2023	9	21	11	15	48	1		Seed plant	MUS_383		Angraecum sp.	orchidaceae	Valid	5.37	40						false	5	dry/fallen fruit	10	0	0				1	main trunk	Adult	102-290-292		vegetating	65s-48/1	11	21	66359f6d-1040-4c1f-b221-ff99f6641a2b
2023921111548	2023921111548	2023	9	19	9	26	65s	2023	9	21	11	15	48	2		Fern	zz	unknown	Microsorum punctatum	Polypodiaceae	seedling	-0.15	196	0.3	0.3	0.4			false	0	vegetating	1			0.4	0		1	main trunk	Juvenile/Sapling	102-191-192	Frond width - 0.2	vegetating	65s-48/2	11	35	43254d8d-89ff-47b5-99da-8806ad11550a
2023921111548	2023921111548	2023	9	19	9	26	65s	2023	9	21	11	15	48	2		Fern	zz	unknown	Microsorum punctatum	Polypodiaceae	seedling	-0.14		0.4	0.5	0.5			false	0	vegetating	2			0.5	0		1	main trunk	Juvenile/Sapling	102-193-195	Frond width - 0.3	vegetating	65s-48/3	11	39	591b6fbe-6b35-4730-910c-69d2fe741e62
2023921111548	2023921111548	2023	9	19	9	26	65s	2023	9	21	11	15	48	2		Fern	zz	unknown	Microsorum punctatum	Polypodiaceae	seedling	-0.05	166	0.6	0.5	0.4			false	0	vegetating	2			0.4	0		1	main trunk	Juvenile/Sapling	102-196-198	Frond width - 0.3	vegetating	65s-48/4	11	41	ca5b7d6f-a9ed-4020-9a99-79e148d72d1f
2023921111548	2023921111548	2023	9	19	9	26	65s	2023	9	21	11	15	48	2		Fern	zz	unknown	Microsorum punctatum	Polypodiaceae	seedling	-0.05	166	1.1	0.8	1			false	0	vegetating	3			1	0	0	1	main trunk	Juvenile/Sapling	102-199-202	Frond width - 0.4	vegetating	65s-48/5	11	44	ebeda77d-1967-44e7-908c-149fdc82f532
2023921111548	2023921111548	2023	9	19	9	26	65s	2023	9	21	11	15	48	1		Seed plant	MUS_383		Angraecum sp.	orchidaceae	Valid	0.63	140	1.6	1	1.6	1.6	0.6	false	0	vegetating	3	0	0				1	main trunk	Subadult	102-203-205	1.5 leaves eaten	vegetating	65s-48/6	11	46	3d0e56c7-7b2e-4955-98b2-b6b83ae5c51d
2023921111548	2023921111548	2023	9	19	9	26	65s	2023	9	21	11	15	48	1		Seed plant	MUS_383		Angraecum sp.	orchidaceae	Valid	1.1	220	2.8	4.9	5	3.8	0.8	false	0	vegetating	4	0	0				1	main trunk	Subadult	102-206-209	3 out of 4 leaves - tip eaten	vegetating	65s-48/7	11	49	1aa2af07-58da-4f96-8e1e-709aab61109b
2023921111548	2023921111548	2023	9	19	9	26	65s	2023	9	21	11	15	48	1		Seed plant	MUS_383		Angraecum sp.	orchidaceae	Valid	1.1	220	1.4	2.4	4.4	2.5	0.5	false	0	vegetating	2	0	0				1	main trunk	Subadult	102-210-213		vegetating	65s-48/8	11	52	f36b1c27-2496-4f60-8c1d-fe73539bea71
2023921111548	2023921111548	2023	9	19	9	26	65s	2023	9	21	11	15	48	1		Seed plant	MUS_383		Angraecum sp.	orchidaceae	Valid	1.18	220	4	3.7	3.6	4.1	0.6	false	0	vegetating	2	0	0				1	main trunk	Subadult	102-214-216		vegetating	65s-48/9	11	55	6babd436-1450-42c0-8e66-441a2e027528
2023921111548	2023921111548	2023	9	19	9	26	65s	2023	9	21	11	15	48	1		Seed plant	MUS_383		Angraecum sp.	orchidaceae	Valid	1.22	210	4.7	7.5	6.9	6.7	0.8	false	0	vegetating	4	0	0				1	main trunk	Subadult	102-217-219		vegetating	65s-48/10	11	57	e79b320b-ceca-4e46-b994-23543b9e1a02
2023921111548	2023921111548	2023	9	19	9	26	65s	2023	9	21	11	15	48	1		Seed plant	MUS_383		Angraecum sp.	orchidaceae	Valid	1.26	180	3.3	5.2	3.9	4.1	0.8	false	0	vegetating	4	0	0				1	main trunk	Subadult	102-220-222		vegetating	65s-48/11	11	59	fbd7db38-6c48-467d-8c9c-581e752be20b
2023921111548	2023921111548	2023	9	19	9	26	65s	2023	9	21	11	15	48	1		Seed plant	MUS_383		Angraecum sp.	orchidaceae	Valid	1.28	216	5.2	5.3	5.3	5.5	0.9	false	0	vegetating	3	0	0				1	main trunk	Subadult	102-223-225		vegetating	65s-48/12	12	1	902c794c-9c96-45b5-b5e7-a8dfe39c0be3
2023921111548	2023921111548	2023	9	19	9	26	65s	2023	9	21	11	15	48	1		Seed plant	MUS_383		Angraecum sp.	orchidaceae	Valid	1.32	192	0.7	0.7	0.5	0.4	0.4	false	0	vegetating	4	0	0				1	main trunk	Juvenile/Sapling	102-226-228		vegetating	65s-48/13	12	3	1a01427c-621a-4822-83d8-624c7e03a74d
2023921111548	2023921111548	2023	9	19	9	26	65s	2023	9	21	11	15	48	1		Seed plant	MUS_383		Angraecum sp.	orchidaceae	Valid	1.34	222	6.9	10.5	11.6	7.8	1.3	false	0	vegetating	6	0	0				1	main trunk	Adult	102-229-232		vegetating	65s-48/14	12	5	b70edc67-3f66-4ddf-a796-7258f8f241ef
2023921111548	2023921111548	2023	9	19	9	26	65s	2023	9	21	11	15	48	1		Seed plant	MUS_383		Angraecum sp.	orchidaceae	Valid	1.54	144	4.6	10.9	10.8	8.9	11.2	false	3	unripe fruit	4	0	2				1	main trunk	Adult	102-233-237		fruiting	65s-48/15	12	8	31b29b90-d6d2-410b-8fad-600f0a2bd26c
2023921111548	2023921111548	2023	9	19	9	26	65s	2023	9	21	11	15	48	1		Seed plant	MUS_383		Angraecum sp.	orchidaceae	Valid	1.64	214	5.5	6.1	7.2	5.3	0.8	false	0	vegetating	4	0	0				1	main trunk	Subadult	102-238-240		vegetating	65s-48/16	12	11	eec0fbc8-8211-4c8e-b192-8368be56a1b3
2023921111548	2023921111548	2023	9	19	9	26	65s	2023	9	21	11	15	48	1		Seed plant	MUS_383		Angraecum sp.	orchidaceae	Valid	1.32	42	4.7	4.9	2.8	3.7	0.5	false	0	vegetating	5	0	0				1	main trunk	Subadult	102-231-235		vegetating	65s-48/17	12	14	c0cc3c7b-29c9-4ecb-84bf-7efad6af04f2
2023921111548	2023921111548	2023	9	19	9	26	65s	2023	9	21	11	15	48	1		Seed plant	MUS_383		Angraecum sp.	orchidaceae	Valid	1.37	28	2.6	5.2	5.3	3.9	0.7	false	0	vegetating	4	0	0				1	main trunk	Subadult	102-246-249		vegetating	65s-48/18	12	54	4cd29f27-478b-4b12-8fc2-ae2948829663
2023921111548	2023921111548	2023	9	19	9	26	65s	2023	9	21	11	15	48	1		Seed plant	MUS_383		Angraecum sp.	orchidaceae	Valid	1.68	346	3.6	1.9	2.5	2.9	0.5	false	0	vegetating	4	0	0				1	main trunk	Subadult	102-250-252		vegetating	65s-48/19	12	58	065de231-5145-4673-81c8-462e1c3ea6d8
2023921111548	2023921111548	2023	9	19	9	26	65s	2023	9	21	11	15	48	1		Seed plant	MUS_383		Angraecum sp.	orchidaceae	Valid	1.68	246	6.7	12.6	10.7	9.4	1.3	false	4	ripe fruit	3	0	1				1	main trunk	Adult	102-253-256		fruiting	65s-48/20	13	1	465fb3dc-627c-42d8-85bd-7aab7438bc8b
2023921111548	2023921111548	2023	9	19	9	26	65s	2023	9	21	11	15	48	1		Seed plant	MUS_383		Angraecum sp.	orchidaceae	Valid	1.91	60	0.7	1.2	0.8	0.9	0.3	false	0	vegetating	4	0	0				1	main trunk	Juvenile/Sapling	102-257-258		vegetating	65s-48/21	13	4	c5415f18-9875-437d-a238-749a98ab1997
2023921111548	2023921111548	2023	9	19	9	26	65s	2023	9	21	11	15	48	1		Seed plant	MUS_383		Angraecum sp.	orchidaceae	Valid	1.92	90	0.4	0.9	0.9	0.7	0.2	false	0	vegetating	3	0	0				1	main trunk	Juvenile/Sapling	102-259-261		vegetating	65s-48/22	13	7	6cfdc7fa-2135-4e95-ba58-0325bce56d07
2023921111548	2023921111548	2023	9	19	9	26	65s	2023	9	21	11	15	48	1		Seed plant	MUS_383		Angraecum sp.	orchidaceae	Valid	1.99	174	1.9	2.3	3.6	2.9	1.6	false	0	vegetating	5	0	0				1	main trunk	Subadult	102-262-264		vegetating	65s-48/23	13	10	6f823c2d-00ed-41a6-8afb-925b3e5b00f6
2023921111548	2023921111548	2023	9	19	9	26	65s	2023	9	21	11	15	48	1		Seed plant	MUS_383		Angraecum sp.	orchidaceae	Valid	2.1	60				1.1	0.3	false	0	vegetating	1	0	0				1	main trunk	Juvenile/Sapling	102-266-268		vegetating	65s-48/24	13	13	2839ff2f-d36f-4b8e-843f-497ac7a556c7
2023921111548	2023921111548	2023	9	19	9	26	65s	2023	9	21	11	15	48	1		Seed plant	MUS_383		Angraecum sp.	orchidaceae	Valid	2.19	12						false	0	vegetating	3	0	0				1	main trunk	Juvenile/Sapling	102-269-271		vegetating	65s-48/25	13	15	db197f04-42b0-4953-a88f-bf56a919014f
2023921111548	2023921111548	2023	9	19	9	26	65s	2023	9	21	11	15	48	1		Seed plant	MUS_383		Angraecum sp.	orchidaceae	Valid	2.2	36						false	0	vegetating	3	0	0				1	main trunk	Juvenile/Sapling	102-272-274		vegetating	65s-48/26	13	18	40b95d42-f95f-476b-923f-508e47e6f8bb
2023921111548	2023921111548	2023	9	19	9	26	65s	2023	9	21	11	15	48	1		Seed plant	MUS_383		Angraecum sp.	orchidaceae	Valid	2.2	26				13	1.9	false	5	dry/fallen fruit	7	0	0				1	main trunk	Adult	102-275-278		vegetating	65s-48/27	13	23	05632ccb-4087-437f-b0f3-fd225bf67142
2023921111548	2023921111548	2023	9	19	9	26	65s	2023	9	21	11	15	48	1		Seed plant	MUS_383		Angraecum sp.	orchidaceae	Valid	2.05	260				12.7	1.6	false	3	unripe fruit	6	0	1				1	main trunk	Adult	102-279-283		fruiting	65s-48/28	13	25	ef06eced-6cc5-44c0-bec4-0415a161e338
2023921111548	2023921111548	2023	9	19	9	26	65s	2023	9	21	11	15	48	1		Seed plant	MUS_383		Angraecum sp.	orchidaceae	Valid	2.31	60						false	0	vegetating	5	0	0				1	main trunk	Subadult	102-284-287		vegetating	65s-48/29	13	32	c8f4fdf9-da68-420a-a790-b28520671e6e
2023921111548	2023921111548	2023	9	19	9	26	65s	2023	9	21	11	15	48	1		Seed plant	MUS_383		Angraecum sp.	orchidaceae	Valid	2.44	66						false	0	vegetating	6	0	0				1	main trunk	Subadult	102-288-289		vegetating	65s-48/30	13	35	949bd6a8-b27f-4a30-a7df-7230bc1d7d89
20239299558	20239299558	2023	9	29	9	42	65s	2023	9	29	9	55	8	2		Fern	FERN_175		Lepisorus spicata	Polypodiaceae	Valid	-0.2	200	6.1	3.5	7		0.6	false	0	vegetating	4			6.6	0		1	main trunk	Juvenile/Sapling	102-302-307		vegetating	65s-8/1	10	13	4108fb8b-b4b8-4019-8c0e-9b547d90412c
20239299558	20239299558	2023	9	29	9	42	65s	2023	9	29	9	55	8	2		Fern	FERN_175		Microsorum punctatum	Polypodiaceae	seedling	-0.21	204	1.5	1.8	0.6		0.3	false	0	vegetating	7			1.5	0		1	main trunk	Juvenile/Sapling	309-312		vegetating	65s-8/2	10	21	40e1072e-c0d2-4441-884d-f0d1ef848c8d
20239299558	20239299558	2023	9	29	9	42	65s	2023	9	29	9	55	8	2		Fern	FERN_175		Microsorum punctatum	Polypodiaceae	seedling	0.21	212	1.3	1.5	0.7		0.3	false	0	vegetating	6	0	0	1	0	0	1	main trunk	Juvenile/Sapling	314-316		vegetating	65s-8/3	10	25	f8d63dc2-ab8d-4d0b-bd1d-353f0095a040
20239299558	20239299558	2023	9	29	9	42	65s	2023	9	29	9	55	8	2		Fern	FERN_175		Microsorum punctatum	Polypodiaceae	seedling	-0.1	162	1.5	1.3	1.3		0.3	false	0	vegetating	9	0	0	1.1	0		1	main trunk	Juvenile/Sapling	319-325		vegetating	65s-8/4	10	30	afe9a0a5-3007-446f-ae37-e4ccf369c16f
20239299558	20239299558	2023	9	29	9	42	65s	2023	9	29	9	55	8	2		Fern	FERN_175		Microsorum punctatum	Polypodiaceae	seedling	-0.15	154	1.8	1.7	1		0.4	false	0	vegetating	3			1.3	0		1	main trunk	Juvenile/Sapling	326-328		vegetating	65s-8/5	10	34	34df8889-02d9-4cac-9cce-5b8e20f71253
20239299558	20239299558	2023	9	29	9	42	65s	2023	9	29	9	55	8	2		Fern	FERN_175		Microsorum punctatum	Polypodiaceae	seedling	-0.1	154		1	0.7		0.3	false	0	vegetating	2			0.6	0		1	main trunk	Juvenile/Sapling	329-330		vegetating	65s-8/6	10	39	53daa41b-106c-4064-ad8b-69c08223cd98
20239299558	20239299558	2023	9	29	9	42	65s	2023	9	29	9	55	8	2		Fern	FERN_175		Microsorum punctatum	Polypodiaceae	seedling	-0.1	154		1.2	0.7		0.4	false	0	vegetating	3			0.7	0		1	main trunk	Juvenile/Sapling	331-332		vegetating	65s-8/7	10	42	06fd82f0-f176-4ccc-9461-8b9111d356cb
20239299558	20239299558	2023	9	29	9	42	65s	2023	9	29	9	55	8	2		Fern	FERN_175		Microsorum punctatum	Polypodiaceae	seedling	-0.1	154		1	1		0.3	false	0	vegetating	2			1.1	0		1	main trunk	Juvenile/Sapling	333-334		vegetating	65s-8/8	10	45	0aacec3d-db3c-42b4-af39-347beead0e6f
20239299558	20239299558	2023	9	29	9	42	65s	2023	9	29	9	55	8	2		Fern	FERN_175		Microsorum punctatum	Polypodiaceae	seedling	-0.09	172	1.4	1.6	1.2		0.4	false	0	vegetating	2			0.9	0		1	main trunk	Juvenile/Sapling	337-338			65s-8/9	10	48	66a497f3-2f4a-4d29-a374-0bdc18df2410
20239299558	20239299558	2023	9	29	9	42	65s	2023	9	29	9	55	8	2		Fern	FERN_175		Microsorum punctatum	Polypodiaceae	seedling	-0.09	218	0.5	0.7	0.1		0.3	false	0	vegetating	2			0.5	0		1	main trunk	Juvenile/Sapling	339-342		vegetating	65s-8/10	10	51	21002d31-9c90-4a43-8982-bf8164546657
20239299558	20239299558	2023	9	29	9	42	65s	2023	9	29	9	55	8	2		Fern	FERN_175		Microsorum punctatum	Polypodiaceae	Valid	0.17	158	2.2	1.2	2.8		0.8	false	0	vegetating	2			2.8	0		1	main trunk	Juvenile/Sapling	343-346		vegetating	65s-8/11	10	55	858249de-c0ab-4c6b-8a95-0ba7891269f5
20239299558	20239299558	2023	9	29	9	42	65s	2023	9	29	9	55	8	2		Fern	FERN_175		Microsorum punctatum	Polypodiaceae	seedling	0.7	190	2.6	2.4	1.2		0.8	false	0	vegetating	5			2.3	0		1	main trunk	Juvenile/Sapling	347-350		vegetating	65s-8/12	10	58	bc12fc47-dc2d-486f-a669-5e4340f2d900
20239299558	20239299558	2023	9	29	9	42	65s	2023	9	29	9	55	8	2		Fern	FERN_175		Microsorum punctatum	Polypodiaceae	seedling	0.65	154	0.7	1.1	0.7		0.3	false	0	vegetating	4			0.9	0		1	main trunk	Juvenile/Sapling	351-354			65s-8/13	11	2	fdd6a336-f8e5-4ec1-b442-cdb1f2331fd2
20239299558	20239299558	2023	9	29	9	42	65s	2023	9	29	9	55	8	2		Fern	FERN_175		Microsorum punctatum	Polypodiaceae	seedling	0.89	268	0.3	0.6	0.6		0.2	false	0	vegetating	4			0.3	0		1	main trunk	Juvenile/Sapling	355-359		vegetating	65s-8/14	11	4	9cef123a-044a-4e79-b86f-9c0509d00f7b
20239299558	20239299558	2023	9	29	9	42	65s	2023	9	29	9	55	8	2		Fern	FERN_175		Microsorum punctatum	Polypodiaceae	seedling	2.07	62						false	0	vegetating	3				0		1	main trunk	Juvenile/Sapling	360		vegetating	65s-8/15	11	8	3bc35a7c-05e1-4399-842f-45555879db36
20239299558	20239299558	2023	9	29	9	42	65s	2023	9	29	9	55	8	2		Fern	FERN_175		Microsorum punctatum	Polypodiaceae	seedling	2.08	62						false	0	vegetating	5				0		1	main trunk	Juvenile/Sapling	361-365		vegetating	65s-8/16	11	11	85744427-513a-400e-94de-16d6b15ebf88
20239299558	20239299558	2023	9	29	9	42	65s	2023	9	29	9	55	8	2		Fern	FERN_173		Microsorum punctatum	Polypodiaceae	seedling	2.49	114						false	0	vegetating	5				0		1	main trunk	Juvenile/Sapling	366-367		vegetating	65s-8/16	11	15	ad4b7c8e-4898-4de7-aca3-268ca3c6c025
20239299558	20239299558	2023	9	29	9	42	65s	2023	9	29	9	55	8	2		Fern	FERN_175		Lepisorus spicata	Polypodiaceae	Valid	2.59	102						false	0	vegetating	4				0		1	main trunk	Juvenile/Sapling	368-369		vegetating	65s-8/17	11	20	70b70aa0-f831-4017-834e-54fe05fa4e6d
20239299558	20239299558	2023	9	29	9	42	65s	2023	9	29	9	55	8	2		Fern	FERN_175		Lepisorus spicata	Polypodiaceae	Valid	2.6	120						false	0	vegetating	4				0		1	main trunk	Juvenile/Sapling	370-371		vegetating	65s-8/19	11	23	7860e488-d598-4b0e-8e80-d425c4e08a0c
20239299558	20239299558	2023	9	29	9	42	65s	2023	9	29	9	55	8	2		Fern	FERN_173		Microsorum punctatum	Polypodiaceae	seedling	2.65	106						false	0	vegetating	3				0		1	main trunk	Juvenile/Sapling	375-377		vegetating	65s-8/20	11	25	a6ef97e3-00aa-4622-a6aa-68504dadd5ce
20239299558	20239299558	2023	9	29	9	42	65s	2023	9	29	9	55	8	2		Fern	FERN_173		Microsorum punctatum	Polypodiaceae	Valid	3.98	180									5				0		1	main trunk	Juvenile/Sapling	378-379		vegetating	65s-8/21	11	30	ad66b84f-064a-4c7e-bf1c-de786a5519f6
20239299558	20239299558	2023	9	29	9	42	65s	2023	9	29	9	55	8	2		Fern	FERN_175		Lepisorus spicata	Polypodiaceae	Valid	4.4	180						false	0	vegetating	6				0		1	main trunk	Juvenile/Sapling	380-381		vegetating	65s-8/22	11	32	0f8c4c43-5c2d-4c26-80c4-99f36d33790d
20239299558	20239299558	2023	9	29	9	42	65s	2023	9	29	9	55	8	2		Fern	zz		Lepisorus spicata	Polypodiaceae	Valid	4.4	114						false	0	vegetating	3				0		1	main trunk	Juvenile/Sapling	382-383		vegetating	65s-8/23	11	35	77dbfc9c-92aa-4cd6-9a77-c990429697eb
2023929115236	2023929115236	2023	9	29	9	42	65s	2023	9	29	11	52	36	1		Seed plant	MUS_383		Angraecum sp.	orchidaceae	Valid	4.16	146						false	0	vegetating	5						1	main trunk	Adult	391-394		vegetating	65s-36/1	12	7	932e5d25-e578-4a35-8631-8ff4e9e7ea5c
2023929123938	2023929123938	2023	9	29	9	42	65s	2023	9	29	12	39	38	2		Fern	FERN_175		Lepisorus spicata	Polypodiaceae	Valid	0.13	248	2.7	3.9	3.3		0.7	false	0	vegetating	6			4.6	0	0.1	1	main trunk	Juvenile/Sapling	400-403		vegetating	65s-38/1	12	45	34352048-907b-43a6-910e-e574293ca350
2023929123938	2023929123938	2023	9	29	9	42	65s	2023	9	29	12	39	38	2		Fern	FERN_175		Microsorum punctatum	Polypodiaceae	seedling	0.13	330	0.3	0.9	0.5		0.2	false	0	vegetating	5			0.5	0		1	main trunk	Born/Seedling	404-407		vegetating	65s-38/2	12	49	5ca4a7b2-0e73-4dcf-8355-69a085f68b7e
2023929123938	2023929123938	2023	9	29	9	42	65s	2023	9	29	12	39	38	2		Fern	FERN_175		Microsorum scolopendria	Polypodiaceae	seedling	0.17	144	1.6	2.2	1.9		0.5	false	0	vegetating	4			2.2	0		1	main trunk	Juvenile/Sapling	408-412		vegetating	65s-38/3	12	53	e5c14187-8fc6-48ef-839a-df7423f50958
2023929123938	2023929123938	2023	9	29	9	42	65s	2023	9	29	12	39	38	1		Seed plant	MUS_383		Angraecum sp.	orchidaceae	Valid	1.5	116	2.2	3	3.6	3.1	0.8	false	0	vegetating	5						1	main trunk	Subadult	413-415		vegetating	65s-38/3	12	57	0aae670b-6aff-4308-b41d-7f63f08daa5b
2023929123938	2023929123938	2023	9	29	9	42	65s	2023	9	29	12	39	38	2		Fern	FERN_175		Microsorum punctatum	Polypodiaceae	seedling	1.61	124	0.3	0.3	0.4		0.2	false	0	vegetating	2			0.5	0		1	main trunk	Juvenile/Sapling	416-419		vegetating	65s-38/4	13	1	73db4418-90bd-46db-bd2e-911b31e26ef9
2023929123938	2023929123938	2023	9	29	9	42	65s	2023	9	29	12	39	38	2		Fern	FERN_175		Microsorum punctatum	Polypodiaceae	seedling	1.73	198	0.4	0.7	0.6		0.2	false	0	vegetating	4			0.5	0		1	main trunk	Juvenile/Sapling	421-422		vegetating	65s-38/5	13	3	d01e4ac1-aded-4c8a-82c0-0a66b4946aa8
2023929123938	2023929123938	2023	9	29	9	42	65s	2023	9	29	12	39	38	2		Fern	FERN_173		Microsorum punctatum	Polypodiaceae	seedling	2.86	234						false	0	vegetating	3						1	main trunk	Juvenile/Sapling	424-425		vegetating	65s-38/7	13	6	2d26995f-636e-4497-9bfa-4621145d0974
2023929123938	2023929123938	2023	9	29	9	42	65s	2023	9	29	12	39	38	2		Fern	FERN_173		Microsorum punctatum	Polypodiaceae	seedling	2.88	234						false	0	vegetating	2				0		1	main trunk	Juvenile/Sapling	425-426		vegetating	65s-38/8	13	9	98a039dc-b1e3-44ac-922d-a36ce123ca8e
2023929123938	2023929123938	2023	9	29	9	42	65s	2023	9	29	12	39	38	2		Fern	FERN_175		Lepisorus spicata	Polypodiaceae	Valid	2.96	232							0	vegetating	5				0		1	main trunk	Juvenile/Sapling	427-428		vegetating	65s-38/9	13	11	dd3edf75-1853-4880-bf0f-0ea87faf7ef1
2023929123938	2023929123938	2023	9	29	9	42	65s	2023	9	29	12	39	38	2		Fern	FERN_169		Lepisorus spicata	Polypodiaceae	Valid	3.15	110		6				false	4	ripe fruit	2				2		1	main trunk	Adult	429-430		fruiting	65s-38/10	13	14	9d0be8d7-ec2c-4556-a1d1-6b9b068479dc
202392914735	202392914735	2023	9	29	9	42	65s	2023	9	29	14	7	35	2		Fern	FERN_173		Microsorum punctatum	Polypodiaceae	seedling	0.1	204	1.2	0.9	0.4		0.3	false	0	vegetating	4	0	0	1	0		1	main trunk	Juvenile/Sapling	102-457-459		vegetating	65s-35/1	9	53	42a44740-de67-4b13-a4b3-1e32500912a2
202392914735	202392914735	2023	9	29	9	42	65s	2023	9	29	14	7	35	1		Seed plant	MUS_383		Angraecum sp.	orchidaceae	Valid	2.91	182						false	0	vegetating	4	0	0				1	main trunk	Subadult	460-462		vegetating	65s-35/2	10	3	eb10a417-8565-447d-a156-aad019e10fb0
202392914735	202392914735	2023	9	29	9	42	65s	2023	9	29	14	7	35	1		Seed plant	MUS_383		Angraecum sp.	orchidaceae	Valid	3.01	182						false	0	vegetating	2	0	0				1	main trunk	Subadult	463-46		vegetating	65s-35/3	10	9	98399a4c-8bb0-4804-b936-2f088b051a2a
202392914735	202392914735	2023	9	29	9	42	65s	2023	9	29	14	7	35	1		Seed plant	MUS_384		Angraecum sp.	orchidaceae	Valid	3.01	182						false	0	vegetating	5	0	0				1	main trunk	Adult	465 - 466		vegetating	65s-35/4	10	12	8ea10136-5076-4edf-be3b-870b6bd122ce
202392914735	202392914735	2023	9	29	9	42	65s	2023	9	29	14	7	35	1		Seed plant	MUS_383		Angraecum sp.	orchidaceae	Valid	3.2	182						false	5	dry/fallen fruit	9	0	0				1	main trunk	Adult	467-469		vegetating	65s-35/5	10	13	ae45233a-307f-4672-9205-31c9fc515b2e
202392914735	202392914735	2023	9	29	9	42	65s	2023	9	29	14	7	35	1		Seed plant	MUS_383		Angraecum sp.	orchidaceae	Valid	3.25	182						false	0	vegetating	4	0	0				1	main trunk	Subadult	470-472		vegetating	65s-35/6	10	17	388bb69a-338e-4198-b3db-2c20d56de773
202392914735	202392914735	2023	9	29	9	42	65s	2023	9	29	14	7	35	1		Seed plant	MUS_384		Angraecum sp.	orchidaceae	Valid	3	220						false	0	vegetating	4	0	0				1	main trunk	Juvenile/Sapling	473-475		vegetating	65s-35/7	10	21	2557974e-b9ca-4725-9328-5d45c9b4b179
202392914735	202392914735	2023	9	29	9	42	65s	2023	9	29	14	7	35	1		Seed plant	MUS_383		Angraecum sp.	orchidaceae	Valid	3.42	214						false	0	vegetating	4	0	0				1	main trunk	Juvenile/Sapling	476-478		vegetating	65s-35/8	10	27	342b39a3-c8b8-45c6-b64f-338a689866bc
2023103104439	2023103104439	2023	10	3	9	42	65s	2023	10	3	10	44	39	1		Seed plant	MUS_383		Angraecum sp.	orchidaceae	Valid	0.1	44	0.8	1.5	0.5	0.9	0.3	false	0	vegetating	5	0	0				1	main trunk	Juvenile/Sapling	480-483		vegetating	65s-39/1	10	52	04743332-c527-4f83-8434-a78cf6780e13
2023103104439	2023103104439	2023	10	3	9	42	65s	2023	10	3	10	44	39	1		Seed plant	MUS_383		Angraecum sp.	orchidaceae	Valid	0.12	206	2.7	3	2.4	2.5	0.7	false	0	vegetating	6	0	0				1	main trunk	Juvenile/Sapling	484-486		vegetating	65s-39/2	10	57	38582078-ab7e-47a4-bda9-b227d62c156c
2023103104439	2023103104439	2023	10	3	9	42	65s	2023	10	3	10	44	39	1		Seed plant	MUS_383		Angraecum sp.	orchidaceae	Valid	0.13	182	0.4	0.4	0.2	0.2	0.1	false	0	vegetating	2	0	0				1	main trunk	Juvenile/Sapling	487-490		vegetating	65s-39/3	11	0	864ae383-8702-43a1-8df5-c7c8277beb87
2023103104439	2023103104439	2023	10	3	9	42	65s	2023	10	3	10	44	39	1		Seed plant	MUS_383		Angraecum sp.	orchidaceae	Valid	0.14	212	1.4	2.3	2.1	1.7	0.5	false	0	vegetating	5	0	0				1	main trunk	Subadult	491-493		vegetating	65s-39/4	11	3	88607064-888a-4e29-814d-9ad9e0610b86
2023103104439	2023103104439	2023	10	3	9	42	65s	2023	10	3	10	44	39	1		Seed plant	MUS_383		Angraecum sp.	orchidaceae	Valid	0.32	184	0.9	1.9	1.3	1.4	0.4	false	0	vegetating	4	0					1	main trunk	Juvenile/Sapling	494-497		vegetating	65s-39/5	11	5	e14d1131-7566-4c82-9763-931f73d9f17b
2023103104439	2023103104439	2023	10	3	9	42	65s	2023	10	3	10	44	39	1		Seed plant	MUS_383		Angraecum sp.	orchidaceae	Valid	0.37	64	2.8	2.4	2.9	2.8	0.6	false	0	vegetating	5	0	0				1	main trunk	Subadult	498-501		vegetating	65s-39/6	11	8	2575f776-7b5a-4392-9e0c-14ef36e00662
2023103104439	2023103104439	2023	10	3	9	42	65s	2023	10	3	10	44	39	1		Seed plant	MUS_383		Angraecum sp.	orchidaceae	Valid	0.66	166	0.8	1.7	1	1.4	0.4	false	0	vegetating	3	0	0				1	main trunk	Juvenile/Sapling	502-504		vegetating	65s-39/7	11	11	ce2dad43-5600-45db-8e8c-7a1a857e71a7
2023103121342	2023103121342	2023	10	3	9	42	65s	2023	10	3	12	13	42	1		Seed plant	MUS_383		Angraecum sp.	orchidaceae	Valid	1.7	118	16.1	16.5	19	13.7	1.2	false	5	dry/fallen fruit	12	0	0				1	main trunk	Adult	521-525		vegetating	65s-42/1	12	24	28af1cbf-f420-44a6-bda6-4287f8698821
20231031383	20231031383	2023	10	3	9	42	65s	2023	10	3	13	8	3	2		Fern	FERN_173		Microsorum punctatum	Polypodiaceae	seedling	0.3	302	1.5	2.2	1	1.4	0.5	false	0	vegetating	4	0	0				1	main trunk	Juvenile/Sapling	537-538		vegetating	65s-3/1	13	18	499dc24e-7f29-4ccb-a7c6-d6978ccc58f3
202310313313	202310313313	2023	10	3	9	42	65s	2023	10	3	13	31	3	1		Seed plant	MUS_383		Polystachia mauritiana s.l.	orchidaceae	Valid	3.94	234						false	0	vegetating	2						1	main trunk	Juvenile/Sapling	543-544		vegetating	65s-3/1	13	40	fa5f0488-ac0b-42a3-a448-2404c98c20ee
20231222937191	20231222937191	2023	12	22	9	36	65s	2023	12	22	9	37	191	1		Seed plant	MUS_379		Angraecum sp.	orchidaceae	Valid	1.01	178	9	21	1.5	10.5	1	true	0	dry/fallen fruit	3	0	1				1	main trunk	Adult	102-685-686		vegetating	65s-191/1	9	49	60b7e126-ac63-4a7b-8085-356ddc62da4d
20231222937191	20231222937191	2023	12	22	9	36	65s	2023	12	22	9	37	191	1		Seed plant	MUS_379		Angraecum sp.	orchidaceae	Valid	1	140	1	1.4	0.5	0.7	0.3	true	0	vegetating	2	0	0				1	main trunk	Juvenile/Sapling	687-688	Leaf tip eaten.		65s-191/2	9	53	0e90a88c-891d-48ab-97a2-513cf350cf30
20231222937191	20231222937191	2023	12	22	9	36	65s	2023	12	22	9	37	191	1		Seed plant	MUS_379		Aeranthes arachnitis	orchidaceae	Valid	1.02	140	1.2	0.4	2.4	1.2	0.3	true	0	vegetating	4	0	0				1	main trunk	Juvenile/Sapling	102-689-691			65s-191/3	9	56	e6521b56-cd69-425a-9910-7959488dce54
20231222937191	20231222937191	2023	12	22	9	36	65s	2023	12	22	9	37	191	1		Seed plant	MUS_379		Angraecum sp.	orchidaceae	Valid	1.27		1.54	1.37	0.82	0.59	0.88	false	0	vegetating	4	0	0				1	main trunk	Juvenile/Sapling	695-696		vegetating	65s-191/4	10	11	256538c2-1ee2-43eb-b3a2-910f147d3b73
202310695350	202310695350	2023	10	6	9	42	65s	2023	10	6	9	53	50	2		Fern	FERN_173		Microsorum punctatum	Polypodiaceae	seedling	2	200	1.3	2.2	2.4		1	false	0	vegetating	3			3	0		1	main trunk	Juvenile/Sapling	552-554		vegetating	65s-50/1	10	1	f4b09481-44d7-4fab-8fee-925cc4080678
202310695350	202310695350	2023	10	6	9	42	65s	2023	10	6	9	53	50	2		Fern	FERN_169		Lepisorus spicata	Polypodiaceae	Valid	2	142	14.1	5.3	10.4		0.7	false	0	vegetating	5			12.8	0		1	main trunk	Subadult	555-559		vegetating	65s-50/2	10	6	dd61e3b9-db27-4253-a4c1-f0f756ed8005
202310695350	202310695350	2023	10	6	9	42	65s	2023	10	6	9	53	50	2		Fern	FERN_169		Lepisorus spicata	Polypodiaceae	Valid	0.12	100	1.3	1.8	2.3		0.4	false	0	vegetating	4			2.1	0		1	main trunk	Juvenile/Sapling	560-564		vegetating	65s-50/3	10	10	671a5d5f-3ce7-411b-bd07-b44f69a32f23
202310695350	202310695350	2023	10	6	9	42	65s	2023	10	6	9	53	50	1		Seed plant	MUS_383		Angraecum sp.	orchidaceae	Valid	1.97	158		2.4	3.4	2.7	0.5	false	0	vegetating	3	0	0				1	main trunk	Subadult	565-567		vegetating	65s-50/4	10	13	45a8ed23-7f4b-4406-b6d2-7b89bb8b6ca3
202310695350	202310695350	2023	10	6	9	42	65s	2023	10	6	9	53	50	1		Seed plant	MUS_383		Angraecum sp.	orchidaceae	Valid	1.97	158		2.4	3.4	2.7	0.5	false	0	vegetating	3	0	0				1	main trunk	Subadult	565-567		vegetating	65s-50/4b	10	13	45a8ed23-7f4b-4406-b6d2-7b89bb8b6ca4
202310695350	202310695350	2023	10	6	9	42	65s	2023	10	6	9	53	50	1		Seed plant	MUS_383		Angraecum sp.	orchidaceae	Valid	2.04	108						false	0	vegetating	3	0	0				1	main trunk	Juvenile/Sapling	568-570		vegetating	65s-50/5	10	18	f1ea4939-4fd1-4b19-8a20-748798dfac66
202310695350	202310695350	2023	10	6	9	42	65s	2023	10	6	9	53	50	1		Seed plant	MUS_383		Angraecum sp.	orchidaceae	Valid	2.5	230							4	ripe fruit	5	0	1				2	crown	Adult	571-573		fruiting	65s-50/6	10	20	2058f15b-b0a3-4142-841b-44d9356f5a97
2023106103452	2023106103452	2023	10	6	9	42	65s	2023	10	6	10	34	52	2		Fern	FERN_169		Lepisorus spicata	Polypodiaceae	Valid	-0.15	194	1.6	5.2	9		0.5	false	0	vegetating	4			8.7	0		1	main trunk	Subadult	578-580		vegetating	65s-52/1	10	58	e48992f1-5549-4b69-ba60-865d5b62247e
2023106103452	2023106103452	2023	10	6	9	42	65s	2023	10	6	10	34	52	2		Fern	FERN_169		Lepisorus spicata	Polypodiaceae	Valid	-0.15	200	0.9	1.6	1.3		0.2	false	0	vegetating	3			1.3	0		1	main trunk	Juvenile/Sapling	581-583		vegetating	65s-52/2	11	2	7e45b7fc-91d1-44fc-9e44-0b06622b6625
2023106103452	2023106103452	2023	10	6	9	42	65s	2023	10	6	10	34	52	2		Fern	FERN_169		Lepisorus spicata	Polypodiaceae	Valid	-0.08	210	4.3	5.1	3.8		0.7	false	0	vegetating	1			6.8	0	0.4	1	main trunk	Subadult	584-588		vegetating	65s-52/3	11	4	5d4ce7ef-4def-4233-855b-b21f966b0db9
2023106103452	2023106103452	2023	10	6	9	42	65s	2023	10	6	10	34	52	2		Fern	FERN_173		Microsorum punctatum	Polypodiaceae	seedling	-0.09	210	1.3	0.9	0.8		0.3	false	0	vegetating	3			1.1	0	0	1	main trunk	Juvenile/Sapling	589-591		vegetating	65s-52/4	11	8	81cedbe4-1953-4919-8ae7-c33fa68a694c
2023106103452	2023106103452	2023	10	6	9	42	65s	2023	10	6	10	34	52	2		Fern	FERN_173		Microsorum punctatum	Polypodiaceae	seedling	0	160	0.4	0.2	0.1		0.2	false	0	vegetating	2			0.4	0		1	main trunk	Juvenile/Sapling	592-593		vegetating	65s-52/5	11	10	b4234a64-ea6b-441a-9069-f5404c41d003
2023106103452	2023106103452	2023	10	6	9	42	65s	2023	10	6	10	34	52	2		Fern	FERN_173		Microsorum punctatum	Polypodiaceae	seedling	0	160	0.4	0.6	0.4		0.1	false	0	vegetating	4			0.4	0		1	main trunk	Juvenile/Sapling	594-595		vegetating	65s-52/6	11	14	dd0f43f6-5ca6-44ef-bb2d-075f8381cdb7
2023106103452	2023106103452	2023	10	6	9	42	65s	2023	10	6	10	34	52	2		Fern	FERN_173		Microsorum punctatum	Polypodiaceae	seedling	9	94	0.7	0.4	0.6		0.2	false	0	vegetating	4			0.4	0		1	main trunk	Juvenile/Sapling	596-597		vegetating	65s-52/7	11	17	6549b967-9bbc-41ec-a22d-c8cf578c1a5d
2023106103452	2023106103452	2023	10	6	9	42	65s	2023	10	6	10	34	52	2		Fern	FERN_173		Microsorum punctatum	Polypodiaceae	seedling	0	160	0.5	0.5	0.3		0.2	false	0	vegetating	5			0.4	0		1	main trunk	Juvenile/Sapling	596-597		vegetating	65s-52/8	11	19	5334207a-7e56-4952-9b62-81dcc59c336b
2023106103452	2023106103452	2023	10	6	9	42	65s	2023	10	6	10	34	52	2		Fern	FERN_173		Microsorum punctatum	Polypodiaceae	seedling	0.02	160	3.1	3.4	1.9		0.9	false	0	vegetating	6			2.6	0		1	main trunk	Juvenile/Sapling	598-599		vegetating	65s-52/9	11	21	96d123f1-6003-41b8-881d-b57acd6a6ab4
2023106103452	2023106103452	2023	10	6	9	42	65s	2023	10	6	10	34	52	2		Fern	FERN_173		Microsorum punctatum	Polypodiaceae	seedling	0.02	160	0.4	0.3	0.1		0.2				3			0.4	0		1	main trunk	Juvenile/Sapling	601-693		vegetating	65s-52/10	11	26	f72e754d-035c-4169-9ccd-e3f9a6ad0d50
2023106103452	2023106103452	2023	10	6	9	42	65s	2023	10	6	10	34	52	2		Fern	FERN_173		Microsorum punctatum	Polypodiaceae	seedling	0.02	160	0.4	0.4	0.3		0.2	false	0	vegetating	3			0.4	0		1	main trunk	Juvenile/Sapling	601-603		vegetating	65s-52/11	11	29	65f18f26-5193-4f85-ab8e-6c1f4ee34b3c
2023106103452	2023106103452	2023	10	6	9	42	65s	2023	10	6	10	34	52	2		Fern	FERN_173		Microsorum punctatum	Polypodiaceae	seedling	-0.2	198	0.8	0.4	0.4		0.2	false	0	vegetating	3			0.7	0		1	main trunk	Juvenile/Sapling	604-606		vegetating	65s-52/12	11	32	114978f6-0c1a-422f-be8e-805086c9c0f9
2023106103452	2023106103452	2023	10	6	9	42	65s	2023	10	6	10	34	52	2		Fern	FERN_173		Microsorum punctatum	Polypodiaceae	seedling	-0.2	198	0.5	0.2	0.5		0.2	false	0	vegetating	2			0.5	0		1	main trunk	Juvenile/Sapling	607-611		vegetating	65s-52/13	11	35	ac2d570f-d01d-44af-ac11-852f7553f1f1
2023106103452	2023106103452	2023	10	6	9	42	65s	2023	10	6	10	34	52	2		Fern	FERN_173		Microsorum punctatum	Polypodiaceae	seedling	-0.2	198	0.6	0.3	0.5		0.2	false	0	vegetating	2			0.6	0		1	main trunk	Juvenile/Sapling	607-611		vegetating	65s-52/14	11	37	99c8f1db-70b9-416f-9f0c-b1c0ebbcd2ad
2023106103452	2023106103452	2023	10	6	9	42	65s	2023	10	6	10	34	52	2		Fern	FERN_173		Microsorum punctatum	Polypodiaceae	seedling	-0.2	198	0.6	0.5	0.4		0.2	false	0	vegetating	3			0.5	0		1	main trunk	Juvenile/Sapling	607-611		vegetating	65s-52/15	11	39	25a961f1-0436-4420-84ff-77e4fe78f775
2023106103452	2023106103452	2023	10	6	9	42	65s	2023	10	6	10	34	52	2		Fern	FERN_173		Microsorum punctatum	Polypodiaceae	seedling	-0.15	198	1.3	0.9	1.2		0.2	false	0	vegetating	4			1.2			1	main trunk	Juvenile/Sapling	615-616		vegetating	65s-52/16	11	41	d2c4c69d-75f1-41d5-be2f-d27463424f8b
2023106103452	2023106103452	2023	10	6	9	42	65s	2023	10	6	10	34	52	2		Fern	FERN_173		Microsorum punctatum	Polypodiaceae	seedling	-0.15	198	1.3	0.9	1.7		0.4	false	0	vegetating	5			1.4	0		1	main trunk	Juvenile/Sapling	615-616		vegetating	65s-52/17	11	47	e5677f78-235f-43d2-9f4d-466977e1d9f3
2023106103452	2023106103452	2023	10	6	9	42	65s	2023	10	6	10	34	52	2		Fern	FERN_173		Microsorum punctatum	Polypodiaceae	seedling	-0.7	198	1.3	1.2	1		0.2	false	0	vegetating	4			1.2	0		1	main trunk	Juvenile/Sapling	617-618		vegetating	65s-52/18	11	49	3a5a7c10-10e0-478f-a9bb-d10c5c94ae54
2023106103452	2023106103452	2023	10	6	9	42	65s	2023	10	6	10	34	52	2		Fern	FERN_173		Microsorum punctatum	Polypodiaceae	seedling	-0.05	198	0.6	0.9	0.4		0.2	false	0	vegetating	3			0.6	0		1	main trunk	Juvenile/Sapling	619		vegetating	65s-52/19	11	51	b5c03209-3f72-4432-9bc6-e3ea2d233fdc
2023106103452	2023106103452	2023	10	6	9	42	65s	2023	10	6	10	34	52	2		Fern	FERN_173		Microsorum punctatum	Polypodiaceae	seedling	-0.05	198	0.4	0.1	0.2		0.2	false	0	vegetating	2			0.4	0		1	main trunk	Juvenile/Sapling	619		vegetating	65s-52/20	11	54	eb0b7afa-8afd-437d-aaef-f2b10d0f849f
2023106103452	2023106103452	2023	10	6	9	42	65s	2023	10	6	10	34	52	2		Fern	FERN_173		Microsorum punctatum	Polypodiaceae	seedling	-0.04	198	0.6	0.6	0.3		0.2	false	0	vegetating	4			0.6	0		1	main trunk	Juvenile/Sapling	620		vegetating	65s-52/21	11	55	8d082a0f-0580-42b9-8ebb-659aedf375ae
2023106103452	2023106103452	2023	10	6	9	42	65s	2023	10	6	10	34	52	2		Fern	FERN_173		Microsorum punctatum	Polypodiaceae	seedling	-0.4	198	2.4	2.2	2.1		0.3	false	0	vegetating	9			2.2	0		1	main trunk	Juvenile/Sapling	621-622		vegetating	65s-52/22	11	57	218d0669-64c0-444d-8afa-9a5ed1e38f3a
2023106103452	2023106103452	2023	10	6	9	42	65s	2023	10	6	10	34	52	2		Fern	FERN_173		Microsorum punctatum	Polypodiaceae	seedling	-0.04	198	0.7	1	0.8		0.2	false	0	vegetating	4			1	0		1	main trunk	Juvenile/Sapling	623-625		vegetating	65s-52/23	11	59	42ad3a51-3c34-4694-b7c7-e0364f9cc192
2023106103452	2023106103452	2023	10	6	9	42	65s	2023	10	6	10	34	52	2		Fern	FERN_173		Microsorum punctatum	Polypodiaceae	seedling	-0.04	198	0.5	0.4	0.3		0.2	false	0	vegetating	3			0.4	0	0	1	main trunk	Juvenile/Sapling	623-625		vegetating	65s-52/24	12	1	d9e0013c-2d80-4e2f-a89b-6b72c75b1b32
2023106103452	2023106103452	2023	10	6	9	42	65s	2023	10	6	10	34	52	2		Fern	FERN_173		Microsorum punctatum	Polypodiaceae	seedling	-0.04	200	1.3	0.7	0.5		0.2	false	0	vegetating	3			1.3	0		1	main trunk	Juvenile/Sapling	626-628		vegetating	65s-52/25	12	2	b7af07c6-b71a-48c4-be18-9616ee3e4cd7
2023106103452	2023106103452	2023	10	6	9	42	65s	2023	10	6	10	34	52	2		Fern	FERN_173		Microsorum punctatum	Polypodiaceae	seedling	-0.09	200	1.1	0.9	0.7		0.2	false	0	vegetating	4			1.1	0		1	main trunk	Juvenile/Sapling	629-630		vegetating	65s-52/26	12	6	9e0e4385-3b41-4891-b951-d9331b6bc1b8
2023106103452	2023106103452	2023	10	6	9	42	65s	2023	10	6	10	34	52	2		Fern	FERN_173		Microsorum punctatum	Polypodiaceae	seedling	-0.09	200	0.5	1.5	0.6		0.2	false	0	vegetating	5			0.7	0		1	main trunk	Juvenile/Sapling	631		vegetating	65s-52/27	12	8	32d97057-333b-46f2-a466-70a1e4c7ed87
2023106103452	2023106103452	2023	10	6	9	42	65s	2023	10	6	10	34	52	2		Fern	FERN_173		Microsorum punctatum	Polypodiaceae	seedling	-0.09	200	0.7	0.8	0.5		0.2	false	0	vegetating	3			0.7	0		1	main trunk	Juvenile/Sapling	632		vegetating	65s-52/28	12	9	081f8119-0f64-4ba0-b817-cb17ec4d3f42
2023106103452	2023106103452	2023	10	6	9	42	65s	2023	10	6	10	34	52	2		Fern	FERN_173		Microsorum punctatum	Polypodiaceae	seedling	0.09	200	0.2	0.6	0.6		0.2	false	0	vegetating	4			1.2	0		1	main trunk	Juvenile/Sapling	632		vegetating	65s-52/29	12	11	ac89363e-a448-4f38-af3d-cfcf382f5446
2023106103452	2023106103452	2023	10	6	9	42	65s	2023	10	6	10	34	52	2		Fern	FERN_173		Microsorum punctatum	Polypodiaceae	seedling	0.09	200	1.2	1.2	0.5		0.2	false	0	vegetating	8			0.8			1	main trunk	Juvenile/Sapling	633-634		vegetating	65s-52/30	12	13	888a284d-e9c1-4309-a44f-e398445ecc7d
2023106103452	2023106103452	2023	10	6	9	42	65s	2023	10	6	10	34	52	2		Fern	zz		Microsorum punctatum	Polypodiaceae	seedling	2.75	144									2						1	main trunk	Juvenile/Sapling	677			65s-52/32	12	31	ce88c7ba-acda-4a1e-9561-247cf42fc976
2023106103452	2023106103452	2023	10	6	9	42	65s	2023	10	6	10	34	52	1		Seed plant	MUS_460		Polystachia mauritiana s.l.	orchidaceae	Valid	5.9	172						false	4	ripe fruit	5	1	20				1	main trunk	Adult	637	Fruiting and flowering	fruiting	65s-52/33	12	32	0388bbfc-2f54-47fd-8bea-0a80a175328d
2023106103452	2023106103452	2023	10	6	9	42	65s	2023	10	6	10	34	52	1		Seed plant	MUS_383		Polystachia mauritiana s.l.	orchidaceae	Valid	2.84	50								vegetating	3	0	0		0		1	main trunk	Juvenile/Sapling	642-643			65s-52/34	12	35	00e126c7-35bb-4284-ae90-af2b89ad279b
2023106103452	2023106103452	2023	10	6	9	42	65s	2023	10	6	10	34	52	2		Fern	zz		Microsorum punctatum	Polypodiaceae	seedling	2.75	132									6						1	main trunk	Juvenile/Sapling	677		vegetating	65s-52/35	12	39	0c080f9e-c65b-4157-a03b-9d7da4671e86
2023106103452	2023106103452	2023	10	6	9	42	65s	2023	10	6	10	34	52	1		Seed plant	MUS_460		Polystachia mauritiana s.l.	orchidaceae	Valid	5.7	22								dry/fallen fruit	4							crown	Adult	645-646			65s-52/36	12	40	1019eecc-436e-4463-a097-f00e62434b3b
2023106103452	2023106103452	2023	10	6	9	42	65s	2023	10	6	10	34	52	1		Seed plant	MUS_383		Angraecum sp.	orchidaceae	Valid	5.8	22							0	vegetating	4	0	0				2	crown	Juvenile/Sapling	650-651		vegetating	65s-52/37	12	42	b3fec707-8de8-4e8c-ae10-93884bf77dca
2023106103452	2023106103452	2023	10	6	9	42	65s	2023	10	6	10	34	52	2		Fern	zz		Microsorum punctatum	Polypodiaceae	seedling	2.75	132									4							main trunk		677		vegetating	65s-52/38	12	44	6c496697-17ee-4e92-a596-4afbe1626c60
2023106103452	2023106103452	2023	10	6	9	42	65s	2023	10	6	10	34	52	2		Fern	zz		Microsorum punctatum	Polypodiaceae	seedling	2.78	132									4							main trunk		677		vegetating	65s-52/39	9	56	6f2dc44c-8c7b-409e-b3ef-063766232a40
2023106103452	2023106103452	2023	10	6	9	42	65s	2023	10	6	10	34	52	2		Fern	zz		Microsorum punctatum	Polypodiaceae	seedling	2.78	132									4							main trunk		677			65s-52/40	9	58	3ac55744-3701-47a4-b4eb-681a557bcc0c
2023106103452	2023106103452	2023	10	6	9	42	65s	2023	10	6	10	34	52	2		Fern	zz		Microsorum punctatum	Polypodiaceae	seedling	2.81	132									2							main trunk	Juvenile/Sapling	677			65s-52/41	9	59	12cb6a4b-6b1a-4136-b25c-6a1403d7eee6
2023106103452	2023106103452	2023	10	6	9	42	65s	2023	10	6	10	34	52	2		Fern	zz		Microsorum punctatum	Polypodiaceae	seedling	2.81	132									5							main trunk		677			65s-52/42	10	2	80293db2-f7d3-4c0a-a4e9-cba0eba405f6
2023106103452	2023106103452	2023	10	6	9	42	65s	2023	10	6	10	34	52	2		Fern	zz		Microsorum punctatum	Polypodiaceae	seedling	2.81	132									9							main trunk		677			65s-52/43	10	3	3184e7fd-85b0-4a94-a419-251756e4e9a6
2023106103452	2023106103452	2023	10	6	9	42	65s	2023	10	6	10	34	52	2		Fern	zz		Microsorum punctatum	Polypodiaceae	seedling	2.84	132									3							main trunk		677			65s-52/44	10	4	0066f136-c781-4826-8fef-c0c85dbfd9a4
2023106103452	2023106103452	2023	10	6	9	42	65s	2023	10	6	10	34	52	2		Fern	zz		Microsorum punctatum	Polypodiaceae	seedling	2.84	132									2							main trunk		677			65s-52/45	10	5	e78eb0d9-5191-4272-b4af-0d4e12b3d866
2023106103452	2023106103452	2023	10	6	9	42	65s	2023	10	6	10	34	52	2		Fern	zz		Microsorum punctatum	Polypodiaceae	seedling	2.82	132									3							main trunk		677			65s-52/46	10	6	c7760183-213d-4046-a946-e4aab83acf0e
2023106103452	2023106103452	2023	10	6	9	42	65s	2023	10	6	10	34	52	2		Fern	zz		Microsorum punctatum	Polypodiaceae	seedling	8.82	132									12							main trunk		681			65s-52/47	10	7	63aa56d6-d291-4563-a823-18778e61e90e
2023106103452	2023106103452	2023	10	6	9	42	65s	2023	10	6	10	34	52	2		Fern	zz		Microsorum punctatum	Polypodiaceae	seedling	2.82	132									5							main trunk	Juvenile/Sapling	681			65s-52/48	10	9	b8358498-10b9-44b5-832b-68d5e3de1126
2023106103452	2023106103452	2023	10	6	9	42	65s	2023	10	6	10	34	52	2		Fern	zz		Microsorum punctatum	Polypodiaceae	seedling	2.82	132									3							main trunk		681			65s-52/49	10	9	5982f105-2281-49d0-880d-d1eabb5ae4a2
2023106103452	2023106103452	2023	10	6	9	42	65s	2023	10	6	10	34	52	2		Fern	zz		Microsorum punctatum	Polypodiaceae	seedling	2.82	132									7							main trunk		682			65s-52/50	10	10	d4b8272a-cde2-4142-bcbf-6426326ab444
2023106103452	2023106103452	2023	10	6	9	42	65s	2023	10	6	10	34	52	2		Fern	zz		Microsorum punctatum	Polypodiaceae	seedling	2.82	132									3							main trunk		682			65s-52/51	10	11	673f356b-224a-49f1-8f67-a5b726678a80
2023106103452	2023106103452	2023	10	6	9	42	65s	2023	10	6	10	34	52	2		Fern	zz		Microsorum punctatum	Polypodiaceae	seedling	2.82	132									3							main trunk		682			65s-52/52	10	12	7caee2f1-5b85-4e61-9390-f069623833fa
2023106103452	2023106103452	2023	10	6	9	42	65s	2023	10	6	10	34	52	2		Fern	zz		Microsorum punctatum	Polypodiaceae	seedling	2.22	132									2							main trunk		682			65s-52/53	10	12	85c81e0b-876f-4977-b8d5-f1a073bd7342
2023106103452	2023106103452	2023	10	6	9	42	65s	2023	10	6	10	34	52	2		Fern	zz		Microsorum punctatum	Polypodiaceae	seedling	2.9	132									4						1	main trunk	Juvenile/Sapling	682			65s-52/54	10	13	ed2058b5-8cf2-44b3-affd-de9d847b11c7
2023106103452	2023106103452	2023	10	6	9	42	65s	2023	10	6	10	34	52	2		Fern	zz		Microsorum punctatum	Polypodiaceae	seedling	2.9	132									3						1	main trunk	Juvenile/Sapling	682		vegetating	65s-52/55	10	14	421cfe15-95a8-4bd5-9954-d91f4315abea
2023106103452	2023106103452	2023	10	6	9	42	65s	2023	10	6	10	34	52	1		Seed plant	MUS_383		Angraecum sp.	orchidaceae	Valid	5.7	20							0	vegetating	3	0	0				2	crown	Juvenile/Sapling	650-651		vegetating	65s-52/56	10	26	e2bb39b1-95d4-4fe6-ac5e-4842bde96b3f
2023106103452	2023106103452	2023	10	6	9	42	65s	2023	10	6	10	34	52	1		Seed plant	MUS_460		Polystachia mauritiana s.l.	orchidaceae	Valid	5.73	340							0	vegetating	4	0	0				2	crown	Juvenile/Sapling	D5600-295		vegetating	65s-52/57	10	28	63cafcf6-2450-4b6f-9529-672834bbe638
2023106103452	2023106103452	2023	10	6	9	42	65s	2023	10	6	10	34	52	1		Seed plant	MUS_460		Polystachia mauritiana s.l.	orchidaceae	Valid	5.7	352							0	vegetating	4	0	0					crown	Juvenile/Sapling	D5600-295		vegetating	65s-52/58	10	36	395ce20a-1962-4c19-bf1d-62314fabce98
2023106103452	2023106103452	2023	10	6	9	42	65s	2023	10	6	10	34	52	1		Seed plant	MUS_383		Angraecum sp.	orchidaceae	Valid	5.4	32								vegetating	5	0	0				1	main trunk	Juvenile/Sapling	D5600-297		vegetating	65s-52/59	10	38	a066ea4f-fed1-4880-9e12-34538dabc9ec
2023106103452	2023106103452	2023	10	6	9	42	65s	2023	10	6	10	34	52	1		Seed plant	MUS_383		Angraecum sp.	orchidaceae	Valid	5.45	30							0	vegetating	4							main trunk	Juvenile/Sapling	D5600-297		vegetating	65s-52/60	10	41	eb94b4f3-d829-4391-b5d0-7bf9bbf91d89
2023106103452	2023106103452	2023	10	6	9	42	65s	2023	10	6	10	34	52	1		Seed plant	MUS_383		Angraecum sp.	orchidaceae	Valid	5.5	292							0	vegetating	4	0	0	0			1	main trunk	Juvenile/Sapling				65s-52/61	10	43	ad382d7b-ef65-4b87-95be-1dd37a6b2bd8
2023106103452	2023106103452	2023	10	6	9	42	65s	2023	10	6	10	34	52	1		Seed plant	MUS_383		Angraecum sp.	orchidaceae	Valid	5.6	250								vegetating	4	0	0				1	main trunk	Juvenile/Sapling	D5600-297		vegetating	65s-52/62	10	45	d8d9f611-2824-4b0d-a69f-446bbfad7143
2023106103452	2023106103452	2023	10	6	9	42	65s	2023	10	6	10	34	52	1		Seed plant	MUS_383		Angraecum sp.	orchidaceae	Valid	5.6	60							0	vegetating	4	0	0				1	main trunk	Juvenile/Sapling	D5600-297		vegetating	65s-52/63	10	46	0b43ba7d-3df1-48a1-a36b-74d2200cc51d
2023106103452	2023106103452	2023	10	6	9	42	65s	2023	10	6	10	34	52	1		Seed plant	MUS_383		Angraecum sp.	orchidaceae	Valid	5.55	60							0	vegetating	3	0	0					main trunk	Juvenile/Sapling	D5600-297		vegetating	65s-52/64	10	49	d551f3e3-06bc-4c3b-aa52-5941205ab838
2023106103452	2023106103452	2023	10	6	9	42	65s	2023	10	6	10	34	52	1		Seed plant	MUS_383		Angraecum sp.	orchidaceae	Valid	5.6	292							0	vegetating	4	0	0				1	main trunk	Juvenile/Sapling	D5600-299		vegetating	65s-52/65	10	50	60efdd3e-3674-4c84-9f1e-c71eb1ffcd64
2023106103452	2023106103452	2023	10	6	9	42	65s	2023	10	6	10	34	52	1		Seed plant	MUS_383		Angraecum sp.	orchidaceae	Valid	5.6	60							0	vegetating	3	0	0	0			1	main trunk	Juvenile/Sapling	D5600-297		vegetating	65s-52/66	10	53	a9d5b7b0-da72-4e1e-a9ef-f07642c98c22
2023106103452	2023106103452	2023	10	6	9	42	65s	2023	10	6	10	34	52	1		Seed plant	MUS_383		Angraecum sp.	orchidaceae	Valid	5.55	66							0	vegetating	5	0	0				1	main trunk	Juvenile/Sapling	D5600-302-303		vegetating	65s-52/67	10	54	7c6e5bac-cc5b-46f4-84d1-bbdf55f8f2b1
2023106103452	2023106103452	2023	10	6	9	42	65s	2023	10	6	10	34	52	1		Seed plant	MUS_383		Angraecum sp.	orchidaceae	Valid	5.45	60								vegetating	3	0	0				1	main trunk	Juvenile/Sapling	D5600-305			65s-52/68	11	3	92905ccc-1256-455b-9dc1-94ae783b81dc
2023106103452	2023106103452	2023	10	6	9	42	65s	2023	10	6	10	34	52	1		Seed plant	MUS_460		Polystachia mauritiana s.l.	orchidaceae	Valid	5.7	60							0	vegetating	7	0	0				1	main trunk	Subadult	D5600-308		vegetating	65s-52/69	11	10	367ff832-d7be-4788-bd8f-cbe3f29619e6
2023106132319	2023106132319	2023	10	6	9	42	65s	2023	10	6	13	23	19	2		Fern	FERN_169		Lepisorus spicata	Polypodiaceae	Valid	1.58	322	11.1	9.8	5.3		0.5	false	0	vegetating	12			8.1	0	0.5	1	main trunk	Adult	662-664		vegetating	65s-19/1	13	32	8f13d2a8-25d8-47f9-83d8-76960654812b
2023106132319	2023106132319	2023	10	6	9	42	65s	2023	10	6	13	23	19	2		Fern	FERN_169		Lepisorus spicata	Polypodiaceae	Valid	1.73	322	5.7	4.4	6.1		0.6	false	0	vegetating	3			7		0.3	1	main trunk	Adult	665-667		vegetating	65s-19/2	13	35	3995fe76-9b31-4f7c-b13d-d366ef9153ee
2023106132319	2023106132319	2023	10	6	9	42	65s	2023	10	6	13	23	19	2		Fern	FERN_169		Lepisorus spicata	Polypodiaceae	Valid	1.8	354	7.5	7.4	7.1		0.7	false	0	vegetating	6			7.6	0	0.3	1	main trunk	Adult	668-670		vegetating	65s-19/3	13	39	cff71534-2151-45f0-9c36-fec685f149d8
2023106132319	2023106132319	2023	10	6	9	42	65s	2023	10	6	13	23	19	2		Fern	FERN_169		Lepisorus spicata	Polypodiaceae	Valid	2.52	280						false	0	vegetating	3				0		1	main trunk	Subadult	671-673		vegetating	65s-19/4	13	42	2a6b4a87-cf61-4a4d-8e39-0d1adc5605a7
20241510353	20241510353	2024	1	5	9	27	65s	2024	1	5	10	35	3	2		Fern	FERN_175		Microsorum punctatum	Polypodiaceae	seedling	0.235	57	0.56	1.2	0.3	0.64	0.2	false	0	vegetating	3	0	0		0		1	main trunk	Juvenile/Sapling	102-754-756		vegetating	65s-3/1	10	39	1540c81b-5ffa-4276-ae39-1ad5a89c9862
202415112038	202415112038	2024	1	5	9	27	65s	2024	1	5	11	20	38	2		Fern	FERN_175		Microsorum punctatum	Polypodiaceae	seedling	0.084	53	1.36	1.48	1.42		0.3	false	0	vegetating	3	0	0	1.42	0		1	main trunk	Juvenile/Sapling	102-757-759		vegetating	65s-38/1	11	23	c81c3101-9e73-4b76-a37c-3cde9e508d83
202415113138	202415113138	2024	1	5	9	27	65s	2024	1	5	11	31	38	2		Fern	FERN_175		Microsorum punctatum	Polypodiaceae	seedling	0.04	136	0.28	0.35	0.34		0.2	false	0	vegetating	3	0	0	0.33	0	0	1	main trunk	Juvenile/Sapling	102-0760-761			65s-38/1	11	36	4fee59c1-c2ae-48df-9cfd-ada6aa4c739d
202415113138	202415113138	2024	1	5	9	27	65s	2024	1	5	11	31	38	2		Fern	FERN_175		Microsorum punctatum	Polypodiaceae	seedling	0.045	46	0.32	0.35	0.35		0.25	false	0	vegetating	5	0	0	0.32	0	0	1	main trunk	Juvenile/Sapling	101-762		vegetating	65s-38/2	11	41	34c98e60-e3bc-4c87-b445-1720e883fdb1
20241512418	20241512418	2024	1	5	9	27	65s	2024	1	5	12	41	8	2		Fern	FERN_175		Microsorum punctatum	Polypodiaceae	seedling	0.095	156	0.33	0.41	0.35		0.24	false	0	vegetating	2	0	0	0.3	0		1	main trunk	Juvenile/Sapling	102-764-765		vegetating	65s-8/1	12	48	d251ec61-419c-48c3-aee6-c189961f0259
20241512418	20241512418	2024	1	5	9	27	65s	2024	1	5	12	41	8	2		Fern	FERN_175		Microsorum punctatum	Polypodiaceae	seedling	0.1	46	0.18	0.33	0.18		0.13	false	0	vegetating	3	0	0	0.21	0		1	main trunk	Juvenile/Sapling	102-766		vegetating	65s-8/2	12	53	c93ca28e-26f8-4b3e-b650-2da6b4f81915
20247141039167	20247141039167	2024	7	14	10	37	65s	2024	7	14	10	39	167	2		Fern	FERN_173		Microsorum punctatum	Polypodiaceae	Valid	0.17	54	38	43	29	30.2	5	false	0	vegetating	9	0	0		0	1	1	main trunk	Subadult			vegetating	65s-167/1	11	1	a4266151-7d27-4186-a842-edec2b4a4873
20247141039167	20247141039167	2024	7	14	10	37	65s	2024	7	14	10	39	167	2		Fern	FERN_121		Asplenium nidus var. nidus	Aspleniaceae	Valid	0.12	54	11	30	25	265	3	false	0	vegetating	7	0	0			1	1	main trunk	Subadult			vegetating	65s-167/2	11	7	ca777b19-aaa3-48c5-86db-270a9d463c6d
20247141039167	20247141039167	2024	7	14	10	37	65s	2024	7	14	10	39	167	1		Seed plant	MUS_400		Angraecum sp.	orchidaceae	Valid	4	164						false	0	vegetating	3	0	0				1	main trunk	Juvenile/Sapling	103-740		vegetating	65s-167/3	11	21	1af13924-7347-4b5c-975f-70097b17d7bb
20247141039167	20247141039167	2024	7	14	10	37	65s	2024	7	14	10	39	167	1		Seed plant	MUS_383		Angraecum sp.	orchidaceae	Valid	5.5	264						false	0	vegetating	3	0	0				1	main trunk	Subadult	103-743		vegetating	65s-167/4	11	26	ed743587-bfea-4d8f-97e7-eb45b6fc5183
20247141039167	20247141039167	2024	7	14	10	37	65s	2024	7	14	10	39	167	1		Seed plant	MUS_400		Angraecum sp.	orchidaceae	Valid	5.5	264						false	0	vegetating	4	0	0				1	main trunk	Adult	744		vegetating	65s-167/5	11	30	5e2a1434-11a5-4eff-9277-9c34db51ba2c
20247141039167	20247141039167	2024	7	14	10	37	65s	2024	7	14	10	39	167	1		Seed plant	MUS_106		Cnestis polyphylla	Connaraceae	Valid	6							false	0	vegetating		0	0				1	main trunk	Adult	103-745		vegetating	65s-167/6	11	32	8af15259-be15-4ad9-8882-1750707fa7b8
20247141039167	20247141039167	2024	7	14	10	37	65s	2024	7	14	10	39	167	1		Seed plant	MUS_397		Angraecum pectinatum	orchidaceae	Valid	8	70						false	0	vegetating	6	0	0				1	main trunk	Subadult	746		vegetating	65s-167/7	11	34	85c491c8-f3bc-48c6-ba57-fe700d64d6b2
20247141039167	20247141039167	2024	7	14	10	37	65s	2024	7	14	10	39	167	1		Seed plant	MUS_397		Angraecum pectinatum	orchidaceae	Valid	8.1	70						false	0	vegetating		0	0				1	main trunk	Adult	747		vegetating	65s-167/8	11	39	9e4661f5-1c34-429c-9695-b39c903ef180
20247141039167	20247141039167	2024	7	14	10	37	65s	2024	7	14	10	39	167	1		Seed plant	MUS_383		Angraecum sp.	orchidaceae	Valid	8.2	150						false	0	dry/fallen fruit	6	0	0				1	main trunk	Adult	748		vegetating	65s-167/9	11	41	dc7a1071-4db0-45d9-9644-004a758fbb5e
20247141039167	20247141039167	2024	7	14	10	37	65s	2024	7	14	10	39	167	1		Seed plant	MUS_397		Angraecum pectinatum	orchidaceae	Valid	8	54						false	3	unripe fruit	11	0	1				1	main trunk	Adult	749		fruiting	65s-167/10	11	44	3e389fe0-20e6-4e73-a4ab-31b19692d65f
20247141039167	20247141039167	2024	7	14	10	37	65s	2024	7	14	10	39	167	1		Seed plant	MUS_397		Angraecum pectinatum	orchidaceae	Valid	6	0						false	0	vegetating	6	0	0				1	main trunk	Subadult	750		vegetating	65s-167/11	11	49	fe93c0bf-3afc-4472-aa7c-cf8cb8370a5e
20247141039167	20247141039167	2024	7	14	10	37	65s	2024	7	14	10	39	167	1		Seed plant	MUS_383		Angraecum sp.	orchidaceae	Valid	7	310						false	0	vegetating	4	0	0				1	main trunk	Adult	751		vegetating	65s-167/12	11	52	cf8c4863-9874-41ce-8d74-7e7156e585c5
20247141039167	20247141039167	2024	7	14	10	37	65s	2024	7	14	10	39	167	1		Seed plant	MUS_383		Angraecum sp.	orchidaceae	Valid	7.5	90						false	0	vegetating	2	0	0				1	main trunk	Subadult	754		vegetating	65s-167/13	11	54	9a91e8d2-e45d-4838-83f3-eff518cd5137
20247141039167	20247141039167	2024	7	14	10	37	65s	2024	7	14	10	39	167	1		Seed plant	MUS_383		Angraecum sp.	orchidaceae	Valid	7.5	330						false	0	vegetating	6	0	0				1	main trunk	Adult	753		vegetating	65s-167/14	11	56	0f521972-7f66-4ab8-88d2-4944a0bda632
2024718954167	2024718954167	2024	7	18	9	53	65s	2024	7	18	9	54	167	1		Seed plant	MUS_383		Angraecum sp.	orchidaceae	Valid	1.8	150	5	6.6	7.8	7	1	true	0	dry/fallen fruit	5	0	0				1	main trunk	Adult	103-759-762		vegetating	65s-167/1	10	0	744fc797-c80e-4cad-baa2-93aa2e79adf2
2024718954167	2024718954167	2024	7	18	9	53	65s	2024	7	18	9	54	167	1		Seed plant	MUS_397		Angraecum pectinatum	orchidaceae	Valid	2.5	190						false	0	vegetating	5	0	0				1	main trunk	Juvenile/Sapling	763	Left one	vegetating	65s-167/2	10	6	7c1ca012-4625-44fd-8e42-b1425b8e3fba
2024718954167	2024718954167	2024	7	18	9	53	65s	2024	7	18	9	54	167	1		Seed plant	MUS_397		Angraecum pectinatum	orchidaceae	Valid	2.5	130						false	0	vegetating	5	0	0				1	main trunk	Juvenile/Sapling	763	Right one	vegetating	65s-167/3	10	9	5eb5b5ca-a3c5-423e-bb56-78f2717db65f
2024718954167	2024718954167	2024	7	18	9	53	65s	2024	7	18	9	54	167	1		Seed plant	MUS_397		Angraecum pectinatum	orchidaceae	Valid	3.2	160						false	0	vegetating	2	0	0	0			1	main trunk	Juvenile/Sapling	765-766		vegetating	65s-167/4	10	18	cf469743-a22d-4eff-b342-37cb61128aad
2024718954167	2024718954167	2024	7	18	9	53	65s	2024	7	18	9	54	167	1		Seed plant	MUS_397		Angraecum pectinatum	orchidaceae	Valid	3.2	160						false	0	vegetating	2	0	0	0				main trunk	Juvenile/Sapling	765-766		vegetating	65s-167/4b	10	18	cf469743-a22d-4eff-b342-37cb61128aad1
2024718954167	2024718954167	2024	7	18	9	53	65s	2024	7	18	9	54	167	1		Seed plant	MUS_397		Angraecum pectinatum	orchidaceae	Valid	3.2	160						false	0	vegetating	2	0	0	0				main trunk	Juvenile/Sapling	765-766		vegetating	65s-167/4c	10	18	cf469743-a22d-4eff-b342-37cb61128aad2
2024718954167	2024718954167	2024	7	18	9	53	65s	2024	7	18	9	54	167	2		Fern	zz	unknown	Microsorum punctatum	Polypodiaceae	seedling	3.4	240						false	0	vegetating	4				0		1	main trunk	Juvenile/Sapling	770		vegetating	65s-167/5	10	19	1912fe33-ee67-484a-874e-2cb5d7031996
2024718954167	2024718954167	2024	7	18	9	53	65s	2024	7	18	9	54	167	1		Seed plant	MUS_397		Angraecum pectinatum	orchidaceae	Valid	3.4	170						false	0	vegetating	4	0	0				1	main trunk	Juvenile/Sapling	774		vegetating	65s-167/6	10	24	409ebdd8-0e50-406d-8770-a8c47bbed1ca
2024718954167	2024718954167	2024	7	18	9	53	65s	2024	7	18	9	54	167	1		Seed plant	MUS_397		Angraecum pectinatum	orchidaceae	Valid	3.4	170						false	0	vegetating	4	0	0				1	main trunk	Juvenile/Sapling	774		vegetating	65s-167/7	10	25	e9cc4067-42df-4adb-a91e-88f60d9964af
2024718954167	2024718954167	2024	7	18	9	53	65s	2024	7	18	9	54	167	1		Seed plant	MUS_397		Angraecum pectinatum	orchidaceae	Valid	3.4	170						false	0	vegetating	3	0	0				1	main trunk	Juvenile/Sapling	774		vegetating	65s-167/8	10	25	1c7b0178-2144-4736-9520-0f20dd71908c
2024718954167	2024718954167	2024	7	18	9	53	65s	2024	7	18	9	54	167	1		Seed plant	MUS_397		Angraecum pectinatum	orchidaceae	Valid	3.4	170						false	0	vegetating	2	0	0				1	main trunk	Juvenile/Sapling	774		vegetating	65s-167/9	10	26	a91beb09-8fa4-4147-99cb-ea7e0ee10bff
2024718954167	2024718954167	2024	7	18	9	53	65s	2024	7	18	9	54	167	1		Seed plant	MUS_397		Angraecum pectinatum	orchidaceae	Valid	3.4	130						false	0	vegetating	4	0	0				1	main trunk	Juvenile/Sapling	777		vegetating	65s-167/10	10	29	44014227-93d0-4f18-aae5-e2866e85bae5
2024718954167	2024718954167	2024	7	18	9	53	65s	2024	7	18	9	54	167	1		Seed plant	MUS_397		Angraecum pectinatum	orchidaceae	Valid	3.4	130						false	0	vegetating	3	0	0				1	main trunk	Juvenile/Sapling	777		vegetating	65s-167/11	10	30	be1bb106-0efa-4f8d-b8ea-7789d66af5d6
2024718954167	2024718954167	2024	7	18	9	53	65s	2024	7	18	9	54	167	1		Seed plant	MUS_397		Angraecum pectinatum	orchidaceae	Valid	3.4	130						false	0	vegetating	2	0	0				1	main trunk	Juvenile/Sapling	777		vegetating	65s-167/12	10	30	c3030a8a-d06e-4af9-a9cd-078ef8363f0e
2024718954167	2024718954167	2024	7	18	9	53	65s	2024	7	18	9	54	167	1		Seed plant	MUS_397		Angraecum pectinatum	orchidaceae	Valid	3.5	130						false	0	vegetating	3	0	0				1	main trunk	Juvenile/Sapling	778		vegetating	65s-167/13	10	31	c0cb31f5-16d2-4cf3-9e94-5ff64f717cae
2024718954167	2024718954167	2024	7	18	9	53	65s	2024	7	18	9	54	167	1		Seed plant	MUS_397		Angraecum pectinatum	orchidaceae	Valid	3.8	180						false	0	vegetating		0	0				1	main trunk	Adult	779		vegetating	65s-167/14	10	37	e23ee568-a222-45e5-989b-e092e2bedbd6
2024718954167	2024718954167	2024	7	18	9	53	65s	2024	7	18	9	54	167	1		Seed plant	MUS_397		Angraecum pectinatum	orchidaceae	Valid	4	180						false	0	vegetating	23	0	0				1	main trunk	Adult	780		vegetating	65s-167/15	10	38	8f6892d0-31ec-479f-8fcc-1c7f9c8256ed
2024718954167	2024718954167	2024	7	18	9	53	65s	2024	7	18	9	54	167	1		Seed plant	MUS_397		Angraecum pectinatum	orchidaceae	Valid	4.2	230						false	0	vegetating		0	0				1	main trunk	Subadult	781, 784		vegetating	65s-167/16	10	39	d8dac2a1-d837-4814-9792-29aa6631a7e0
2024718954167	2024718954167	2024	7	18	9	53	65s	2024	7	18	9	54	167	1		Seed plant	MUS_397		Angraecum pectinatum	orchidaceae	Valid	4.3	230						false	0	dry/fallen fruit	21	0	0				1	main trunk	Adult	782		vegetating	65s-167/17	10	42	35dc3bf3-28c2-4220-b747-8ff04d96677d
2024718954167	2024718954167	2024	7	18	9	53	65s	2024	7	18	9	54	167	1		Seed plant	MUS_397		Angraecum pectinatum	orchidaceae	Valid	3.7	230						false	0	vegetating	5	0	0				1	main trunk	Subadult	783		vegetating	65s-167/18	10	43	cffa06b6-c4b4-44e8-aa50-c110754dad57
2024718954167	2024718954167	2024	7	18	9	53	65s	2024	7	18	9	54	167	1		Seed plant	MUS_397		Angraecum pectinatum	orchidaceae	Valid	4.5	160						false	0	vegetating	13	0	0				1	main trunk	Adult	785		vegetating	65s-167/19	10	46	9e86d654-ad29-43a3-b6ed-b49a8548653a
2024718954167	2024718954167	2024	7	18	9	53	65s	2024	7	18	9	54	167	2		Fern	FERN_173		Microsorum punctatum	Polypodiaceae	Valid	4.5	160						false	0	vegetating	4				0		1	main trunk	Subadult	786		vegetating	65s-167/20	10	48	477444e3-53b5-47e2-b8ae-a8682c001d07
2024718954167	2024718954167	2024	7	18	9	53	65s	2024	7	18	9	54	167	1		Seed plant	MUS_397		Angraecum pectinatum	orchidaceae	Valid	4.5	90						false	0	vegetating	6	0	0				1	main trunk	Adult	788		vegetating	65s-167/21	10	49	eaed975d-d0bf-4f67-8c20-467cddf8c7ed
2024718954167	2024718954167	2024	7	18	9	53	65s	2024	7	18	9	54	167	1		Seed plant	MUS_397		Angraecum pectinatum	orchidaceae	Valid	4.5	90						false	0	vegetating	2	0	0				1	main trunk	Juvenile/Sapling	788		vegetating	65s-167/22	10	51	946b362d-89ca-442d-8ae7-a76ea28fe11f
2024718954167	2024718954167	2024	7	18	9	53	65s	2024	7	18	9	54	167	1		Seed plant	MUS_397		Angraecum pectinatum	orchidaceae	Valid	4.6	130						false	0	vegetating	14	0	0				1	main trunk	Adult	806		vegetating	65s-167/23	11	9	41a5903f-f399-4b6a-9f82-ac9aac1f290e
2024718954167	2024718954167	2024	7	18	9	53	65s	2024	7	18	9	54	167	1		Seed plant	MUS_397		Angraecum pectinatum	orchidaceae	Valid	4.6	130						false	0	vegetating	70	0	0				1	main trunk	Subadult	806		vegetating	65s-167/24	11	11	411a6e7e-6eb2-469c-a5e2-e072e4b1a72a
2024718954167	2024718954167	2024	7	18	9	53	65s	2024	7	18	9	54	167	1		Seed plant	MUS_397		Angraecum pectinatum	orchidaceae	Valid	4.6	130						false	0	vegetating	7	0	0				1	main trunk	Adult	806		vegetating	65s-167/25	11	12	655de933-e1f0-4b8e-bf65-77467353a48c
2024718954167	2024718954167	2024	7	18	9	53	65s	2024	7	18	9	54	167	1		Seed plant	MUS_397		Angraecum pectinatum	orchidaceae	Valid	4.8	130						false	0	vegetating	7	0	0				1	main trunk	Juvenile/Sapling	790		vegetating	65s-167/26	11	14	8508ddef-5dd5-4557-b53d-a665812027e0
2024718954167	2024718954167	2024	7	18	9	53	65s	2024	7	18	9	54	167	1		Seed plant	MUS_397		Angraecum pectinatum	orchidaceae	Valid	4.6	130						false	0	vegetating	6	0	0				1	main trunk	Juvenile/Sapling	790		vegetating	65s-167/26b	11	14	8508ddef-5dd5-4557-b53d-a665812027e01
2024718954167	2024718954167	2024	7	18	9	53	65s	2024	7	18	9	54	167	1		Seed plant	MUS_397		Angraecum pectinatum	orchidaceae	Valid	4.8	130						false	0	vegetating	5	0	0				1	main trunk	Juvenile/Sapling	790		vegetating	65s-167/26c	11	14	8508ddef-5dd5-4557-b53d-a665812027e02
2024718954167	2024718954167	2024	7	18	9	53	65s	2024	7	18	9	54	167	1		Seed plant	MUS_397		Angraecum pectinatum	orchidaceae	Valid	4.8	130						false	0	vegetating	6	0	0				1	main trunk	Juvenile/Sapling	790		vegetating	65s-167/26d	11	14	8508ddef-5dd5-4557-b53d-a665812027e03
2024718954167	2024718954167	2024	7	18	9	53	65s	2024	7	18	9	54	167	2		Fern	FERN_169		Lepisorus spicata	Polypodiaceae	Valid	4.8	130						false	4	ripe fruit	2				2		1	main trunk	Adult	790		reproducing	65s-167/27	11	16	57f2307f-9820-4b74-9027-a1d4e25b663e
2024718954167	2024718954167	2024	7	18	9	53	65s	2024	7	18	9	54	167	1		Seed plant	MUS_397		Angraecum pectinatum	orchidaceae	Valid	5	180						false	0	vegetating	5	0	0				1	main trunk	Juvenile/Sapling	791		vegetating	65s-167/28	11	19	64039bf1-39ea-4fcd-919b-b41ce03fc321
2024718954167	2024718954167	2024	7	18	9	53	65s	2024	7	18	9	54	167	1		Seed plant	MUS_397		Angraecum pectinatum	orchidaceae	Valid	5	180						false	0	vegetating	2	0	0				1	main trunk	Juvenile/Sapling	791		vegetating	65s-167/28b	11	19	64039bf1-39ea-4fcd-919b-b41ce03fc3211
2024718954167	2024718954167	2024	7	18	9	53	65s	2024	7	18	9	54	167	1		Seed plant	MUS_397		Angraecum pectinatum	orchidaceae	Valid	5	180						false	0	vegetating	2	0	0				1	main trunk	Juvenile/Sapling	791		vegetating	65s-167/28c	11	19	64039bf1-39ea-4fcd-919b-b41ce03fc3212
2024718954167	2024718954167	2024	7	18	9	53	65s	2024	7	18	9	54	167	1		Seed plant	MUS_397		Angraecum pectinatum	orchidaceae	Valid	5	180						false	0	vegetating	2	0	0				1	main trunk	Juvenile/Sapling	791		vegetating	65s-167/28d	11	19	64039bf1-39ea-4fcd-919b-b41ce03fc3213
2024718954167	2024718954167	2024	7	18	9	53	65s	2024	7	18	9	54	167	1		Seed plant	MUS_397		Angraecum pectinatum	orchidaceae	Valid	5	180						false	0	vegetating	4	0	0				1	main trunk	Juvenile/Sapling	791		vegetating	65s-167/28e	11	19	64039bf1-39ea-4fcd-919b-b41ce03fc3214
2024718954167	2024718954167	2024	7	18	9	53	65s	2024	7	18	9	54	167	1		Seed plant	MUS_397		Angraecum pectinatum	orchidaceae	Valid	5	180						false	0	vegetating	6	0	0				1	main trunk	Juvenile/Sapling	791		vegetating	65s-167/28f	11	19	64039bf1-39ea-4fcd-919b-b41ce03fc3215
2024718954167	2024718954167	2024	7	18	9	53	65s	2024	7	18	9	54	167	1		Seed plant	MUS_397		Angraecum pectinatum	orchidaceae	Valid	5	180						false	0	vegetating	4	0	0				1	main trunk	Juvenile/Sapling	791		vegetating	65s-167/28g	11	19	64039bf1-39ea-4fcd-919b-b41ce03fc3216
2024718954167	2024718954167	2024	7	18	9	53	65s	2024	7	18	9	54	167	1		Seed plant	MUS_397		Angraecum pectinatum	orchidaceae	Valid	5	180						false	0	vegetating	4	0	0				1	main trunk	Juvenile/Sapling	791		vegetating	65s-167/28h	11	19	64039bf1-39ea-4fcd-919b-b41ce03fc3217
2024718954167	2024718954167	2024	7	18	9	53	65s	2024	7	18	9	54	167	1		Seed plant	MUS_397		Angraecum pectinatum	orchidaceae	Valid	5	180						false	0	vegetating	6	0	0				1	main trunk	Juvenile/Sapling	791		vegetating	65s-167/28i	11	19	64039bf1-39ea-4fcd-919b-b41ce03fc3218
2024718954167	2024718954167	2024	7	18	9	53	65s	2024	7	18	9	54	167	1		Seed plant	MUS_397		Angraecum pectinatum	orchidaceae	Valid	5	180						false	0	vegetating	4	0	0				1	main trunk	Juvenile/Sapling	791		vegetating	65s-167/28j	11	19	64039bf1-39ea-4fcd-919b-b41ce03fc3219
2024718954167	2024718954167	2024	7	18	9	53	65s	2024	7	18	9	54	167	1		Seed plant	MUS_397		Angraecum pectinatum	orchidaceae	Valid	5	180						false	0	vegetating	5	0	0				1	main trunk	Juvenile/Sapling	791		vegetating	65s-167/28k	11	19	64039bf1-39ea-4fcd-919b-b41ce03fc32110
2024718954167	2024718954167	2024	7	18	9	53	65s	2024	7	18	9	54	167	1		Seed plant	MUS_397		Angraecum pectinatum	orchidaceae	Valid	5	180						false	0	vegetating	5	0	0				1	main trunk	Juvenile/Sapling	791		vegetating	65s-167/28l	11	19	64039bf1-39ea-4fcd-919b-b41ce03fc32111
2024718954167	2024718954167	2024	7	18	9	53	65s	2024	7	18	9	54	167	1		Seed plant	MUS_397		Angraecum pectinatum	orchidaceae	Valid	5	160						false	0	vegetating	1	0	0				1	main trunk	Juvenile/Sapling	792			65s-167/29	11	20	c1fae918-d62e-4657-9675-00156cb20d40
2024718954167	2024718954167	2024	7	18	9	53	65s	2024	7	18	9	54	167	1		Seed plant	MUS_397		Angraecum pectinatum	orchidaceae	Valid	5.1	160						false	0	vegetating	5	0	0				1	main trunk	Juvenile/Sapling	792			65s-167/29	11	20	c1fae918-d62e-4657-9675-00156cb20d40
2024718954167	2024718954167	2024	7	18	9	53	65s	2024	7	18	9	54	167	1		Seed plant	MUS_397		Angraecum pectinatum	orchidaceae	Valid	5.1	80						false	0	vegetating		0	0				1	main trunk	Adult	794		vegetating	65s-167/30	11	22	04c97d6b-998d-4b1b-b195-d0fad05da44e
2024718954167	2024718954167	2024	7	18	9	53	65s	2024	7	18	9	54	167	1		Seed plant	MUS_397		Angraecum pectinatum	orchidaceae	Valid	5.1	80						false	0	vegetating		0	0				1	main trunk	Adult	794		vegetating	65s-167/30b	11	22	04c97d6b-998d-4b1b-b195-d0fad05da44e1
2024718954167	2024718954167	2024	7	18	9	53	65s	2024	7	18	9	54	167	1		Seed plant	MUS_397		Angraecum pectinatum	orchidaceae	Valid	5.2	60						false	0	vegetating	2	0	0				1	main trunk	Juvenile/Sapling	805		vegetating	65s-167/31	11	26	df3b1622-5c41-4ccb-949e-59b3e65063bf
2024718954167	2024718954167	2024	7	18	9	53	65s	2024	7	18	9	54	167	1		Seed plant	MUS_397		Angraecum pectinatum	orchidaceae	Valid	5.2	60						false	0	vegetating	5	0	0				1	main trunk	Juvenile/Sapling	805		vegetating	65s-167/31b	11	26	df3b1622-5c41-4ccb-949e-59b3e65063bf1
2024718954167	2024718954167	2024	7	18	9	53	65s	2024	7	18	9	54	167	1		Seed plant	MUS_397		Angraecum pectinatum	orchidaceae	Valid	5.2	60						false	0	vegetating	6	0	0				1	main trunk	Juvenile/Sapling	805		vegetating	65s-167/31c	11	26	df3b1622-5c41-4ccb-949e-59b3e65063bf2
2024718954167	2024718954167	2024	7	18	9	53	65s	2024	7	18	9	54	167	1		Seed plant	MUS_397		Angraecum pectinatum	orchidaceae	Valid	5.2	60						false	0	vegetating	7	0	0				1	main trunk	Juvenile/Sapling	805		vegetating	65s-167/31d	11	26	df3b1622-5c41-4ccb-949e-59b3e65063bf3
2024718954167	2024718954167	2024	7	18	9	53	65s	2024	7	18	9	54	167	1		Seed plant	MUS_397		Angraecum pectinatum	orchidaceae	Valid	5.2	60						false	0	vegetating	5	0	0				1	main trunk	Juvenile/Sapling	805		vegetating	65s-167/31e	11	26	df3b1622-5c41-4ccb-949e-59b3e65063bf4
2024718954167	2024718954167	2024	7	18	9	53	65s	2024	7	18	9	54	167	1		Seed plant	MUS_397		Angraecum pectinatum	orchidaceae	Valid	5.2	60						false	0	vegetating	5	0	0				1	main trunk	Juvenile/Sapling	805		vegetating	65s-167/31f	11	26	df3b1622-5c41-4ccb-949e-59b3e65063bf5
2024718954167	2024718954167	2024	7	18	9	53	65s	2024	7	18	9	54	167	1		Seed plant	MUS_397		Angraecum pectinatum	orchidaceae	Valid	5.2	60						false	0	vegetating	5	0	0				1	main trunk	Juvenile/Sapling	805		vegetating	65s-167/31g	11	26	df3b1622-5c41-4ccb-949e-59b3e65063bf6
2024718954167	2024718954167	2024	7	18	9	53	65s	2024	7	18	9	54	167	1		Seed plant	MUS_397		Angraecum pectinatum	orchidaceae	Valid	5.2	60						false	0	vegetating	6	0	0				1	main trunk	Juvenile/Sapling	805		vegetating	65s-167/31h	11	26	df3b1622-5c41-4ccb-949e-59b3e65063bf7
2024718954167	2024718954167	2024	7	18	9	53	65s	2024	7	18	9	54	167	1		Seed plant	MUS_397		Angraecum pectinatum	orchidaceae	Valid	5.2	60						false	0	vegetating	2	0	0				1	main trunk	Juvenile/Sapling	805		vegetating	65s-167/31i	11	26	df3b1622-5c41-4ccb-949e-59b3e65063bf8
2024718954167	2024718954167	2024	7	18	9	53	65s	2024	7	18	9	54	167	1		Seed plant	MUS_397		Angraecum pectinatum	orchidaceae	Valid	5.2	60						false	0	vegetating	3	0	0				1	main trunk	Juvenile/Sapling	805		vegetating	65s-167/31j	11	26	df3b1622-5c41-4ccb-949e-59b3e65063bf9
2024718954167	2024718954167	2024	7	18	9	53	65s	2024	7	18	9	54	167	1		Seed plant	MUS_397		Angraecum pectinatum	orchidaceae	Valid	5.2	60						false	0	vegetating		0	0				1	main trunk	Juvenile/Sapling	805		vegetating	65s-167/31k	11	26	df3b1622-5c41-4ccb-949e-59b3e65063bf10
2024718954167	2024718954167	2024	7	18	9	53	65s	2024	7	18	9	54	167	1		Seed plant	MUS_397		Angraecum pectinatum	orchidaceae	Valid	5.2	60						false	0	vegetating		0	0				1	main trunk	Juvenile/Sapling	805		vegetating	65s-167/31l	11	26	df3b1622-5c41-4ccb-949e-59b3e65063bf11
2024718954167	2024718954167	2024	7	18	9	53	65s	2024	7	18	9	54	167	1		Seed plant	MUS_397		Angraecum pectinatum	orchidaceae	Valid	5.2	60						false	0	vegetating		0	0				1	main trunk	Juvenile/Sapling	805		vegetating	65s-167/31m	11	26	df3b1622-5c41-4ccb-949e-59b3e65063bf12
2024718954167	2024718954167	2024	7	18	9	53	65s	2024	7	18	9	54	167	1		Seed plant	MUS_397		Angraecum pectinatum	orchidaceae	Valid	5.2	60						false	0	vegetating		0	0				1	main trunk	Juvenile/Sapling	805		vegetating	65s-167/31n	11	26	df3b1622-5c41-4ccb-949e-59b3e65063bf13
2024718954167	2024718954167	2024	7	18	9	53	65s	2024	7	18	9	54	167	1		Seed plant	MUS_397		Angraecum pectinatum	orchidaceae	Valid	5.2	60						false	0	vegetating		0	0				1	main trunk	Juvenile/Sapling	805		vegetating	65s-167/31o	11	26	df3b1622-5c41-4ccb-949e-59b3e65063bf14
2024718954167	2024718954167	2024	7	18	9	53	65s	2024	7	18	9	54	167	1		Seed plant	MUS_397		Angraecum pectinatum	orchidaceae	Valid	5.2	60						false	0	vegetating		0	0				1	main trunk	Juvenile/Sapling	805		vegetating	65s-167/31p	11	26	df3b1622-5c41-4ccb-949e-59b3e65063bf15
2024718954167	2024718954167	2024	7	18	9	53	65s	2024	7	18	9	54	167	1		Seed plant	MUS_397		Angraecum pectinatum	orchidaceae	Valid	5.3	60						false	0	vegetating	5	0	0				1	main trunk	Juvenile/Sapling	796			65s-167/32	11	28	b8691a53-a59c-4026-a4ea-6d38820dd84a
2024718954167	2024718954167	2024	7	18	9	53	65s	2024	7	18	9	54	167	1		Seed plant	MUS_397		Angraecum pectinatum	orchidaceae	Valid	5.3	60						false	0	vegetating	7	0	0				1	main trunk	Juvenile/Sapling	796			65s-167/32b	11	28	b8691a53-a59c-4026-a4ea-6d38820dd84a1
2024718954167	2024718954167	2024	7	18	9	53	65s	2024	7	18	9	54	167	1		Seed plant	MUS_397		Angraecum pectinatum	orchidaceae	Valid	7	160						false	0	vegetating		0	0				1	main trunk	Subadult	797		vegetating	65s-167/33	11	29	86415b9a-1d53-45cd-a05d-09d85e5ffeed
2024718954167	2024718954167	2024	7	18	9	53	65s	2024	7	18	9	54	167	2		Fern	FERN_169		Lepisorus spicata	Polypodiaceae	Valid	7	20						false	0	vegetating	6				0		1	main trunk	Adult	798		vegetating	65s-167/34	11	31	88ed8d32-d7ab-47bc-a8f1-fba1a83919ba
2024718954167	2024718954167	2024	7	18	9	53	65s	2024	7	18	9	54	167	1		Seed plant	MUS_397		Angraecum pectinatum	orchidaceae	Valid	8	20						false	0	vegetating	10	0	0				1	main trunk	Adult	798		vegetating	65s-167/35	11	32	2acbeae8-0e92-4397-8f78-81724f79ab05
2024718954167	2024718954167	2024	7	18	9	53	65s	2024	7	18	9	54	167	1		Seed plant	MUS_397		Angraecum pectinatum	orchidaceae	Valid	7	190						false	0	vegetating	6						1	main trunk	Subadult	799		vegetating	65s-167/36	11	34	b657ab6d-99c9-4b04-a2a4-cf1fcd671019
2024718954167	2024718954167	2024	7	18	9	53	65s	2024	7	18	9	54	167	1		Seed plant	MUS_397		Angraecum pectinatum	orchidaceae	Valid	7	190						false	0	vegetating	3						1	main trunk	Juvenile/Sapling	799		vegetating	65s-167/36b	11	34	b657ab6d-99c9-4b04-a2a4-cf1fcd6710191
2024718954167	2024718954167	2024	7	18	9	53	65s	2024	7	18	9	54	167	1		Seed plant	MUS_397		Angraecum pectinatum	orchidaceae	Valid	7	190						false	0	vegetating							1	main trunk	Subadult	799		vegetating	65s-167/36c	11	34	b657ab6d-99c9-4b04-a2a4-cf1fcd6710192
2024718954167	2024718954167	2024	7	18	9	53	65s	2024	7	18	9	54	167	1		Seed plant	MUS_397		Angraecum pectinatum	orchidaceae	Valid	4	180						false	0	dry/fallen fruit							1	main trunk	Adult	809		vegetating	65s-167/37	11	35	b255ca49-3cbe-42cc-be37-f2b986f9f4ca
2024718954167	2024718954167	2024	7	18	9	53	65s	2024	7	18	9	54	167	1		Seed plant	MUS_397		Angraecum pectinatum	orchidaceae	Valid	5	290						false	0	vegetating		0	0				1	main trunk	Adult	801		vegetating	65s-167/38	11	38	c580e476-ce8d-4cb9-b320-4a4251e6d3a9
2024718954167	2024718954167	2024	7	18	9	53	65s	2024	7	18	9	54	167	1		Seed plant	MUS_397		Angraecum pectinatum	orchidaceae	Valid	6							false	0	vegetating	4						1	main trunk	Juvenile/Sapling	802-803	facing down, no orientation	vegetating	65s-167/39	11	39	b7477f26-636b-4a25-b4d5-2bcc10f09314
2024718954167	2024718954167	2024	7	18	9	53	65s	2024	7	18	9	54	167	1		Seed plant	MUS_397		Angraecum pectinatum	orchidaceae	Valid	6							false	0	vegetating	4						1	main trunk	Juvenile/Sapling	802-803	facing down, no orientation	vegetating	65s-167/39b	11	39	b7477f26-636b-4a25-b4d5-2bcc10f093141
2024718954167	2024718954167	2024	7	18	9	53	65s	2024	7	18	9	54	167	1		Seed plant	MUS_397		Angraecum pectinatum	orchidaceae	Valid	6							false	0	vegetating	4						1	main trunk	Juvenile/Sapling	802-803	facing down, no orientation	vegetating	65s-167/39c	11	39	b7477f26-636b-4a25-b4d5-2bcc10f093142
2024718954167	2024718954167	2024	7	18	9	53	65s	2024	7	18	9	54	167	1		Seed plant	MUS_397		Angraecum pectinatum	orchidaceae	Valid	6							false	0	vegetating	5						1	main trunk	Juvenile/Sapling	802-803	facing down, no orientation	vegetating	65s-167/39d	11	39	b7477f26-636b-4a25-b4d5-2bcc10f093143
2024718954167	2024718954167	2024	7	18	9	53	65s	2024	7	18	9	54	167	1		Seed plant	MUS_397		Angraecum pectinatum	orchidaceae	Valid	6							false	0	vegetating	5						1	main trunk	Juvenile/Sapling	802-803	facing down, no orientation	vegetating	65s-167/39e	11	39	b7477f26-636b-4a25-b4d5-2bcc10f093144
2024718954167	2024718954167	2024	7	18	9	53	65s	2024	7	18	9	54	167	1		Seed plant	MUS_397		Angraecum pectinatum	orchidaceae	Valid	6							false	0	vegetating	4						1	main trunk	Juvenile/Sapling	802-803	facing down, no orientation	vegetating	65s-167/39f	11	39	b7477f26-636b-4a25-b4d5-2bcc10f093145
2024718954167	2024718954167	2024	7	18	9	53	65s	2024	7	18	9	54	167	1		Seed plant	MUS_397		Angraecum pectinatum	orchidaceae	Valid	6							false	0	vegetating							1	main trunk	Juvenile/Sapling	802-803	facing down, no orientation	vegetating	65s-167/39g	11	39	b7477f26-636b-4a25-b4d5-2bcc10f093146
2024718954167	2024718954167	2024	7	18	9	53	65s	2024	7	18	9	54	167	1		Seed plant	MUS_397		Angraecum pectinatum	orchidaceae	Valid	6							false	0	vegetating							1	main trunk	Juvenile/Sapling	802-803	facing down, no orientation	vegetating	65s-167/39h	11	39	b7477f26-636b-4a25-b4d5-2bcc10f093147
2024718954167	2024718954167	2024	7	18	9	53	65s	2024	7	18	9	54	167	1		Seed plant	MUS_397		Angraecum pectinatum	orchidaceae	Valid										vegetating								main trunk				vegetating	65s-167/40	11	41	1a128be6-eee1-4000-968f-f323cc269079
2024718954167	2024718954167	2024	7	18	9	53	65s	2024	7	18	9	54	167	1		Seed plant	MUS_397		Angraecum pectinatum	orchidaceae	Valid										vegetating								main trunk				vegetating	65s-167/40	11	41	1a128be6-eee1-4000-968f-f323cc269079
2024718954167	2024718954167	2024	7	18	9	53	65s	2024	7	18	9	54	167	1		Seed plant	MUS_397		Angraecum pectinatum	orchidaceae	Valid										vegetating								main trunk				vegetating	65s-167/40	11	41	1a128be6-eee1-4000-968f-f323cc269079
2024718954167	2024718954167	2024	7	18	9	53	65s	2024	7	18	9	54	167	1		Seed plant	MUS_397		Angraecum pectinatum	orchidaceae	Valid										vegetating								main trunk				vegetating	65s-167/40	11	41	1a128be6-eee1-4000-968f-f323cc269079
2024718954167	2024718954167	2024	7	18	9	53	65s	2024	7	18	9	54	167	1		Seed plant	MUS_106		Cnestis polyphylla	Connaraceae	Valid	2.2							false	0	vegetating							1	main trunk	Adult		Up to zone 3		65s-167/41	11	45	b89a166e-301c-486a-94e4-f4de6ea45edf
20247181149171	20247181149171	2024	7	18	9	53	65s	2024	7	18	11	49	171	2		Fern	FERN_173		Microsorum punctatum	Polypodiaceae	Valid	0.18	140	4.5	6	8	8	1.7	false	0	vegetating	3				0	0.3	1	main trunk	Juvenile/Sapling			vegetating	65s-171/1	12	14	6ec6b9fd-4a52-4a79-9c54-62a2c9634955
20247181149171	20247181149171	2024	7	18	9	53	65s	2024	7	18	11	49	171	2		Fern	FERN_173		Microsorum punctatum	Polypodiaceae	Valid	0.55	184	12	20	11	14.2	1.2	false	0	vegetating	3				0	0.3	1	main trunk	Subadult			vegetating	65s-171/2	12	16	eceb2417-888f-4227-a184-1b259be4b761
20247181149171	20247181149171	2024	7	18	9	53	65s	2024	7	18	11	49	171	2		Fern	FERN_78		Nephrolepis cordifolia	Nephrolepidaceae	Valid	0.8	100	4	8	6	7	2.3	false	0	vegetating	3				0	0.1	1	main trunk	Juvenile/Sapling			vegetating	65s-171/3	12	19	8f60ac69-1fb1-4a78-9c91-f0da41d61575
20247181149171	20247181149171	2024	7	18	9	53	65s	2024	7	18	11	49	171	2		Fern	FERN_78		Nephrolepis cordifolia	Nephrolepidaceae	Valid	0.9	100	16	24	10	20	4	false	0	vegetating	6				0	0.2	1	main trunk	Subadult			vegetating	65s-171/4	12	21	39c17731-1def-413b-9ef5-35b0be34e34b
20247181149171	20247181149171	2024	7	18	9	53	65s	2024	7	18	11	49	171	2		Fern	FERN_78		Nephrolepis cordifolia	Nephrolepidaceae	Valid	1	110	2.5	8	6.5	6	1.7	false	0	vegetating	2				0	0.1	1	main trunk	Juvenile/Sapling			vegetating	65s-171/5	12	23	fe17365e-3f27-4479-9771-93f640479033
20247181149171	20247181149171	2024	7	18	9	53	65s	2024	7	18	11	49	171	1		Seed plant	MUS_393		Angraecum sp.	orchidaceae	Valid	1.2	0	9.5	8.5	10	7	0.7	false	0	vegetating	6	0	0				1	main trunk	Adult			vegetating	65s-171/6	12	25	b7b4ef34-8976-4f3a-ba29-11742a5485ee
20247181149171	20247181149171	2024	7	18	9	53	65s	2024	7	18	11	49	171	2		Fern	FERN_78		Nephrolepis cordifolia	Nephrolepidaceae	Valid	1.6	56	15	18	21	21	3	false	0	vegetating	2				0	0.2	1	main trunk	Adult			vegetating	65s-171/7	12	28	cad2b735-9056-413b-b927-48af1375bea5
20247181149171	20247181149171	2024	7	18	9	53	65s	2024	7	18	11	49	171	2		Fern	FERN_78		Nephrolepis cordifolia	Nephrolepidaceae	Valid	1.6	184	16	22	20	22.5	4	false	0	vegetating	40				0	0.3	1	main trunk	Adult			vegetating	65s-171/8	12	31	28c5a89f-79f6-4dc7-b54a-d4c6d22d82e4
20247181149171	20247181149171	2024	7	18	9	53	65s	2024	7	18	11	49	171	2		Fern	FERN_78		Nephrolepis cordifolia	Nephrolepidaceae	Valid	1.6	190	2	3.5	6.56	6	1.8	false	0	vegetating	3				0	0.1	1	main trunk	Juvenile/Sapling			vegetating	65s-171/9	12	33	839ac544-d983-4356-8310-555a3ba672b8
20247181149171	20247181149171	2024	7	18	9	53	65s	2024	7	18	11	49	171	2		Fern	FERN_78		Nephrolepis cordifolia	Nephrolepidaceae	Valid	1.7	190	2	1.5	3.5	3.5	1.8	false	0	vegetating	1				0	0.1	1	main trunk	Juvenile/Sapling			vegetating	65s-171/10	12	35	03114cba-0103-4672-b825-35ffc23915d0
20247181149171	20247181149171	2024	7	18	9	53	65s	2024	7	18	11	49	171	2		Fern	FERN_175		Microsorum punctatum	Polypodiaceae	Valid	1.9	204	4	2.54	4	3.5	1	false	0	vegetating	3				0	0.2	1	main trunk	Juvenile/Sapling	817-821		vegetating	65s-171/12	12	42	5ab8878c-85e3-48ff-8a5e-2429ae44ae99
20247181149171	20247181149171	2024	7	18	9	53	65s	2024	7	18	11	49	171	2		Fern	FERN_78		Nephrolepis cordifolia	Nephrolepidaceae	Valid	2.5	220						false	0	vegetating	6				0		1	main trunk	Adult			vegetating	65s-171/13	12	51	c0f3bbe9-0c9d-4b0e-b7df-ceebe9c44441
20247181149171	20247181149171	2024	7	18	9	53	65s	2024	7	18	11	49	171	2		Fern	FERN_78		Nephrolepis cordifolia	Nephrolepidaceae	Valid	2.3	250						false	0	vegetating	2				0		1	main trunk	Subadult			vegetating	65s-171/14	12	52	5f963101-ef6f-407a-800f-23e824024857
20247181149171	20247181149171	2024	7	18	9	53	65s	2024	7	18	11	49	171	2		Fern	FERN_78		Nephrolepis cordifolia	Nephrolepidaceae	Valid	2.3	160						false	0	vegetating	2				0		1	main trunk	Juvenile/Sapling			vegetating	65s-171/15	12	54	5d6a9ad7-a8e5-4db0-b27b-59f33e269353
20247181149171	20247181149171	2024	7	18	9	53	65s	2024	7	18	11	49	171	2		Fern	FERN_78		Nephrolepis cordifolia	Nephrolepidaceae	Valid	2.3	160						false	0	vegetating	5				0		1	main trunk	Adult			vegetating	65s-171/16	12	55	07156c8a-6617-4d1e-a4ef-4426284f170a
20247181149171	20247181149171	2024	7	18	9	53	65s	2024	7	18	11	49	171	2		Fern	FERN_78		Nephrolepis cordifolia	Nephrolepidaceae	Valid	2.4	150						false	0	vegetating	3				0		1	main trunk	Subadult			vegetating	65s-171/17	12	56	d1893715-2c47-4411-b8d9-b91213d788b6
20247181149171	20247181149171	2024	7	18	9	53	65s	2024	7	18	11	49	171	2		Fern	FERN_78		Nephrolepis cordifolia	Nephrolepidaceae	Valid	2.3	110						false	0	vegetating	4				0		1	main trunk	Subadult			vegetating	65s-171/18	12	57	6a93c391-d5a3-4aff-9548-26de3703b415
20247181149171	20247181149171	2024	7	18	9	53	65s	2024	7	18	11	49	171	2		Fern	FERN_78		Nephrolepis cordifolia	Nephrolepidaceae	Valid	3.45	100						false	0	vegetating	4				0		1	main trunk	Subadult			vegetating	65s-171/19	12	59	af1e6b50-85eb-4668-8c95-49c72659a776
20247181149171	20247181149171	2024	7	18	9	53	65s	2024	7	18	11	49	171	2		Fern	FERN_78		Nephrolepis cordifolia	Nephrolepidaceae	Valid	2.6	180						false	0	vegetating	2				0		1	main trunk	Juvenile/Sapling			vegetating	65s-171/20	13	1	d24bde72-2d2b-4fb4-a562-86f804fd2e4a
20247181149171	20247181149171	2024	7	18	9	53	65s	2024	7	18	11	49	171	2		Fern	FERN_78		Nephrolepis cordifolia	Nephrolepidaceae	Valid	2.8	170						false	0	vegetating	2				0		1	main trunk	Juvenile/Sapling			vegetating	65s-171/21	13	1	1ada64a9-6fd7-47b6-a040-5f722d6d609a
20247181149171	20247181149171	2024	7	18	9	53	65s	2024	7	18	11	49	171	2		Fern	FERN_78		Nephrolepis cordifolia	Nephrolepidaceae	Valid	2.7	130						false	0	vegetating	3				0		1	main trunk	Adult			vegetating	65s-171/22	13	2	772e7394-c1c5-4b11-8d71-57625705cce6
20247181149171	20247181149171	2024	7	18	9	53	65s	2024	7	18	11	49	171	2		Fern	FERN_78		Nephrolepis cordifolia	Nephrolepidaceae	Valid	2.7	90						false	0	vegetating	8				0		1	main trunk	Adult			vegetating	65s-171/23	13	3	dc6224bb-39c6-4c6e-8450-77c944d60d9a
20247181149171	20247181149171	2024	7	18	9	53	65s	2024	7	18	11	49	171	2		Fern	FERN_78		Nephrolepis cordifolia	Nephrolepidaceae	Valid	2.9	140						false	0	vegetating	14				0		1	main trunk	Adult	822-824		vegetating	65s-171/24	13	5	be6e724b-aa1f-4bcb-84db-3d9ba19ad7b9
20247181149171	20247181149171	2024	7	18	9	53	65s	2024	7	18	11	49	171	2		Fern	FERN_173		Microsorum punctatum	Polypodiaceae	Valid	2.9	80						false	0	vegetating	16				0		1	main trunk	Adult			vegetating	65s-171/25	13	7	aae3753c-168f-40eb-8fd8-7e5df691d104
20247181149171	20247181149171	2024	7	18	9	53	65s	2024	7	18	11	49	171	2		Fern	FERN_78		Nephrolepis cordifolia	Nephrolepidaceae	Valid	2.4	336						false	0	vegetating	1				0		1	main trunk	Subadult			vegetating	65s-171/26	13	9	9ed0d21e-1290-4683-b630-afd24cf7f0ac
20247181149171	20247181149171	2024	7	18	9	53	65s	2024	7	18	11	49	171	2		Fern	FERN_78		Nephrolepis cordifolia	Nephrolepidaceae	Valid	2.8	336						false	0	vegetating	1			0	0		1	main trunk	Juvenile/Sapling			vegetating	65s-171/27	13	10	5f0b6d8f-208d-4277-9f25-341ab648b1e8
20247181149171	20247181149171	2024	7	18	9	53	65s	2024	7	18	11	49	171	2		Fern	FERN_78		Nephrolepis cordifolia	Nephrolepidaceae	Valid	2.9	336						false	0	vegetating	2				0		1	main trunk	Juvenile/Sapling			vegetating	65s-171/28	13	11	6d286e79-5046-45ad-b592-99d29d27910f
20247181149171	20247181149171	2024	7	18	9	53	65s	2024	7	18	11	49	171	2		Fern	FERN_78		Nephrolepis cordifolia	Nephrolepidaceae	Valid	2.8	270						false	0	vegetating	2				0		1	main trunk	Juvenile/Sapling			vegetating	65s-171/29	13	12	5f181643-4054-4e91-ba37-b09ed59f8740
20247181149171	20247181149171	2024	7	18	9	53	65s	2024	7	18	11	49	171	1		Seed plant	MUS_383		Angraecum sp.	orchidaceae	Valid	2.3	340						false	0	dry/fallen fruit	7	0	0				1	main trunk	Adult	831-832		vegetating	65s-171/30	13	13	d0fe3aeb-29eb-4697-9f71-2b41c524bf73
20247181149171	20247181149171	2024	7	18	9	53	65s	2024	7	18	11	49	171	1		Seed plant	MUS_383		Angraecum sp.	orchidaceae	Valid	2.4	340						false	3	unripe fruit	5	0	2				1	main trunk	Adult	829-830		fruiting	65s-171/31	13	16	aaad3163-6166-4d70-a00e-f7a97075336a
20247181149171	20247181149171	2024	7	18	9	53	65s	2024	7	18	11	49	171	1		Seed plant	MUS_106		Cnestis polyphylla	Connaraceae	Valid								false	0	vegetating						3	1	main trunk	Adult		From zone 1 to 3	vegetating	65s-171/32	13	18	f7c889ba-0e8a-449f-8d8c-752426d839f8
20247181149171	20247181149171	2024	7	18	9	53	65s	2024	7	18	11	49	171	2		Fern	FERN_78		Nephrolepis cordifolia	Nephrolepidaceae	Valid	3.6	34						false	0	vegetating	1				0		1	main trunk	Subadult			vegetating	65s-171/33	13	21	f5d33f85-5c92-499f-812a-e032d451ee4d
20247181149171	20247181149171	2024	7	18	9	53	65s	2024	7	18	11	49	171	2		Fern	FERN_78		Nephrolepis cordifolia	Nephrolepidaceae	Valid	3.1	60						false	0	vegetating					0		1	main trunk	Adult			vegetating	65s-171/34	13	21	0bafb34b-84a6-4901-99ad-6adf929f90cb
20247181149171	20247181149171	2024	7	18	9	53	65s	2024	7	18	11	49	171	2		Fern	FERN_78		Nephrolepis cordifolia	Nephrolepidaceae	Valid	3.4	144						false	0	vegetating	7				0		1	main trunk	Adult			vegetating	65s-171/35	13	23	e707e924-8920-4fee-a823-0609bbb4c382
20247181149171	20247181149171	2024	7	18	9	53	65s	2024	7	18	11	49	171	2		Fern	FERN_78		Nephrolepis cordifolia	Nephrolepidaceae	Valid	3.6	144						false	0	vegetating	3				0		1	main trunk	Adult			vegetating	65s-171/36	13	24	d25fb900-f2cb-41ee-8393-c4f7341c9597
20247181149171	20247181149171	2024	7	18	9	53	65s	2024	7	18	11	49	171	2		Fern	FERN_78		Nephrolepis cordifolia	Nephrolepidaceae	Valid	2.4	140						false	0	vegetating	1				0		1	main trunk	Subadult	833		vegetating	65s-171/37	13	26	dc4a90fc-d427-4307-9e89-608f957f5096
20247181149171	20247181149171	2024	7	18	9	53	65s	2024	7	18	11	49	171	2		Fern	FERN_78		Nephrolepis cordifolia	Nephrolepidaceae	Valid	3.8	112						false	0	vegetating	1				0		1	main trunk	Adult			vegetating	65s-171/38	13	28	e5ea482c-531b-41fc-b528-a000bcffb0d8
20247181149171	20247181149171	2024	7	18	9	53	65s	2024	7	18	11	49	171	2		Fern	FERN_78		Nephrolepis cordifolia	Nephrolepidaceae	Valid	5	340						false	0	vegetating	1				0		1	main trunk	Subadult			vegetating	65s-171/39	13	29	3ff21e6c-7f19-400a-a472-0711902ab4f6
20247181149171	20247181149171	2024	7	18	9	53	65s	2024	7	18	11	49	171	2		Fern	FERN_78		Nephrolepis cordifolia	Nephrolepidaceae	Valid	4	120						false	0	vegetating	1				0		1	main trunk	Subadult	834		vegetating	65s-171/40	13	33	ae55a460-5a0a-42a5-91dd-35f7efe81f3e
20247181149171	20247181149171	2024	7	18	9	53	65s	2024	7	18	11	49	171	2		Fern	FERN_78		Nephrolepis cordifolia	Nephrolepidaceae	Valid	4.3	120						false	0	vegetating	2				0		1	main trunk	Adult			vegetating	65s-171/41	13	35	fa4ad3d7-6daa-462d-a27e-b676d6899fae
20247181149171	20247181149171	2024	7	18	9	53	65s	2024	7	18	11	49	171	2		Fern	FERN_78		Nephrolepis cordifolia	Nephrolepidaceae	Valid	4.4	120						false	0	vegetating	1				0		1	main trunk	Subadult			vegetating	65s-171/42	13	36	706dffe2-46f4-467f-a8e5-0a87b10cef17
20247181149171	20247181149171	2024	7	18	9	53	65s	2024	7	18	11	49	171	2		Fern	FERN_78		Nephrolepis cordifolia	Nephrolepidaceae	Valid	4.7	120						false	0	vegetating	1				0		1	main trunk	Juvenile/Sapling			vegetating	65s-171/43	13	36	10f1bf46-7e1e-459a-8d89-e2d3eccf8b4b
20247181149171	20247181149171	2024	7	18	9	53	65s	2024	7	18	11	49	171	2		Fern	FERN_78		Nephrolepis cordifolia	Nephrolepidaceae	Valid	5.3	150						false	0	vegetating	3				0		1	main trunk	Juvenile/Sapling			vegetating	65s-171/44	13	38	d9f3250e-70e5-4221-812b-9b808a539ce8
20247181149171	20247181149171	2024	7	18	9	53	65s	2024	7	18	11	49	171	2		Fern	FERN_78		Nephrolepis cordifolia	Nephrolepidaceae	Valid	5.3	110						false	0	vegetating	2				0		1	main trunk	Juvenile/Sapling			vegetating	65s-171/45	13	39	5b9b342b-2300-4eb1-93b9-50445eca9228
20247181149171	20247181149171	2024	7	18	9	53	65s	2024	7	18	11	49	171	2		Fern	FERN_78		Nephrolepis cordifolia	Nephrolepidaceae	Valid	6	110						false	0	vegetating	4				0		1	main trunk	Adult			vegetating	65s-171/46	13	40	ea82d57a-5b49-456d-81f9-4070cae219af
20247181149171	20247181149171	2024	7	18	9	53	65s	2024	7	18	11	49	171	2		Fern	FERN_78		Nephrolepis cordifolia	Nephrolepidaceae	Valid	6	160						false	0	vegetating	3				0		2	crown	Adult	835		vegetating	65s-171/47	13	41	7693d5b2-a7aa-45b3-aeae-be4dbeb3118f
20247181149171	20247181149171	2024	7	18	9	53	65s	2024	7	18	11	49	171	2		Fern	FERN_78		Nephrolepis cordifolia	Nephrolepidaceae	Valid	6	160						false	0	vegetating	3				0		2	crown	Adult	835		vegetating	65s-171/47b	13	41	7693d5b2-a7aa-45b3-aeae-be4dbeb3118f1
20247181149171	20247181149171	2024	7	18	9	53	65s	2024	7	18	11	49	171	1		Seed plant	MUS_397		Angraecum sp.	orchidaceae	Valid	6							false	0	vegetating	5	0	0				2	crown	Juvenile/Sapling	838-839		vegetating	65s-171/48	13	46	75fb7574-1cbc-4b20-bd6e-ef819455efed
20247181149171	20247181149171	2024	7	18	9	53	65s	2024	7	18	11	49	171	1		Seed plant	MUS_397		Angraecum pectinatum	orchidaceae	Valid	6	140						false	3	unripe fruit	19	0	1				2	crown	Adult	841		fruiting	65s-171/49	13	47	cd2e1d25-42c4-4916-bc6f-c73e0cfbb85c
20247181149171	20247181149171	2024	7	18	9	53	65s	2024	7	18	11	49	171	1		Seed plant	MUS_400		Polystachia mauritiana s.l.	orchidaceae	Valid	10									ripe fruit	7							main trunk	Adult	842-860, 862	Main trunk from 5 to 10m	vegetating	65s-171/50a	14	2	4adcca53-019b-46c9-8e04-a113fc0c4cdf
20247181149171	20247181149171	2024	7	18	9	53	65s	2024	7	18	11	49	171	2		Seed plant	MUS_401		Polystachia mauritiana s.l.	orchidaceae	Valid	9									vegetating								main trunk	Adult	842-860, 862		vegetating	65s-171/50b	14	2	4adcca53-019b-46c9-8e04-a113fc0c4cdf
20247181149171	20247181149171	2024	7	18	9	53	65s	2024	7	18	11	49	171	3		Seed plant	MUS_402		Polystachia mauritiana s.l.	orchidaceae	Valid	9									vegetating	3							main trunk	Juvenile/Sapling	842-860, 862		vegetating	65s-171/50c	14	2	4adcca53-019b-46c9-8e04-a113fc0c4cdf
20247181149171	20247181149171	2024	7	18	9	53	65s	2024	7	18	11	49	171	4		Seed plant	MUS_403		Angraecum sp.	orchidaceae	Valid	8									vegetating								main trunk	Adult	842-860, 862		vegetating	65s-171/50d	14	2	4adcca53-019b-46c9-8e04-a113fc0c4cdf
20247181149171	20247181149171	2024	7	18	9	53	65s	2024	7	18	11	49	171	5		Seed plant	MUS_404		Polystachia mauritiana s.l.	orchidaceae	Valid	8									unripe fruit	6		10					main trunk	Adult	842-860, 862			65s-171/50e	14	2	4adcca53-019b-46c9-8e04-a113fc0c4cdf
20247181149171	20247181149171	2024	7	18	9	53	65s	2024	7	18	11	49	171	6		Seed plant	MUS_405		Polystachia mauritiana s.l.	orchidaceae	Valid	6 to 8									vegetating	3							main trunk	Juvenile/Sapling	842-860, 862	total number of juveniles based on estimation from photograph		65s-171/50f	14	2	4adcca53-019b-46c9-8e04-a113fc0c4cdf
20247181149171	20247181149171	2024	7	18	9	53	65s	2024	7	18	11	49	171	7		Seed plant	MUS_406		Polystachia mauritiana s.l.	orchidaceae	Valid	6 to 8									vegetating	3							main trunk	Juvenile/Sapling	842-860, 862	total number of juveniles based on estimation from photograph		65s-171/50g	14	2	4adcca53-019b-46c9-8e04-a113fc0c4cdf
20247181149171	20247181149171	2024	7	18	9	53	65s	2024	7	18	11	49	171	8		Seed plant	MUS_407		Polystachia mauritiana s.l.	orchidaceae	Valid	6 to 8									vegetating	4							main trunk	Juvenile/Sapling	842-860, 862	total number of juveniles based on estimation from photograph		65s-171/50h	14	2	4adcca53-019b-46c9-8e04-a113fc0c4cdf
20247181149171	20247181149171	2024	7	18	9	53	65s	2024	7	18	11	49	171	9		Seed plant	MUS_408		Polystachia mauritiana s.l.	orchidaceae	Valid	6 to 8									vegetating	4							main trunk	Juvenile/Sapling	842-860, 862	total number of juveniles based on estimation from photograph		65s-171/50i	14	2	4adcca53-019b-46c9-8e04-a113fc0c4cdf
20247181149171	20247181149171	2024	7	18	9	53	65s	2024	7	18	11	49	171	10		Seed plant	MUS_409		Polystachia mauritiana s.l.	orchidaceae	Valid	6 to 8									vegetating	4							main trunk	Juvenile/Sapling	842-860, 862	total number of juveniles based on estimation from photograph		65s-171/50j	14	2	4adcca53-019b-46c9-8e04-a113fc0c4cdf
20247181149171	20247181149171	2024	7	18	9	53	65s	2024	7	18	11	49	171	11		Seed plant	MUS_410		Polystachia mauritiana s.l.	orchidaceae	Valid	6 to 8									vegetating								main trunk	Juvenile/Sapling	842-860, 862	total number of juveniles based on estimation from photograph		65s-171/50k	14	2	4adcca53-019b-46c9-8e04-a113fc0c4cdf
20247181149171	20247181149171	2024	7	18	9	53	65s	2024	7	18	11	49	171	12		Seed plant	MUS_411		Polystachia mauritiana s.l.	orchidaceae	Valid	6 to 8									vegetating								main trunk	Juvenile/Sapling	842-860, 862	total number of juveniles based on estimation from photograph		65s-171/50l	14	2	4adcca53-019b-46c9-8e04-a113fc0c4cdf
20247181149171	20247181149171	2024	7	18	9	53	65s	2024	7	18	11	49	171	13		Seed plant	MUS_412		Polystachia mauritiana s.l.	orchidaceae	Valid	6 to 8									vegetating								main trunk	Juvenile/Sapling	842-860, 862	total number of juveniles based on estimation from photograph		65s-171/50m	14	2	4adcca53-019b-46c9-8e04-a113fc0c4cdf
20247181149171	20247181149171	2024	7	18	9	53	65s	2024	7	18	11	49	171	14		Seed plant	MUS_413		Polystachia mauritiana s.l.	orchidaceae	Valid	6 to 8									vegetating								main trunk	Juvenile/Sapling	842-860, 862	total number of juveniles based on estimation from photograph		65s-171/50n	14	2	4adcca53-019b-46c9-8e04-a113fc0c4cdf
20247181149171	20247181149171	2024	7	18	9	53	65s	2024	7	18	11	49	171	15		Seed plant	MUS_414		Polystachia mauritiana s.l.	orchidaceae	Valid	6 to 8									vegetating								main trunk	Juvenile/Sapling	842-860, 862	total number of juveniles based on estimation from photograph		65s-171/50o	14	2	4adcca53-019b-46c9-8e04-a113fc0c4cdf
20247181149171	20247181149171	2024	7	18	9	53	65s	2024	7	18	11	49	171	16		Seed plant	MUS_415		Polystachia mauritiana s.l.	orchidaceae	Valid	6 to 8									vegetating								main trunk	Juvenile/Sapling	842-860, 862	total number of juveniles based on estimation from photograph		65s-171/50p	14	2	4adcca53-019b-46c9-8e04-a113fc0c4cdf
20247181149171	20247181149171	2024	7	18	9	53	65s	2024	7	18	11	49	171	17		Seed plant	MUS_416		Polystachia mauritiana s.l.	orchidaceae	Valid	6 to 8									vegetating								main trunk	Juvenile/Sapling	842-860, 862	total number of juveniles based on estimation from photograph		65s-171/50q	14	2	4adcca53-019b-46c9-8e04-a113fc0c4cdf
20247181149171	20247181149171	2024	7	18	9	53	65s	2024	7	18	11	49	171	18		Seed plant	MUS_417		Polystachia mauritiana s.l.	orchidaceae	Valid	6 to 8									vegetating								main trunk	Juvenile/Sapling	842-860, 862	total number of juveniles based on estimation from photograph		65s-171/50r	14	2	4adcca53-019b-46c9-8e04-a113fc0c4cdf
20247181149171	20247181149171	2024	7	18	9	53	65s	2024	7	18	11	49	171	19		Seed plant	MUS_418		Polystachia mauritiana s.l.	orchidaceae	Valid	6 to 8									vegetating								main trunk	Juvenile/Sapling	842-860, 862	total number of juveniles based on estimation from photograph		65s-171/50s	14	2	4adcca53-019b-46c9-8e04-a113fc0c4cdf
20247181149171	20247181149171	2024	7	18	9	53	65s	2024	7	18	11	49	171	20		Seed plant	MUS_419		Polystachia mauritiana s.l.	orchidaceae	Valid	6 to 8									vegetating								main trunk	Juvenile/Sapling	842-860, 862	total number of juveniles based on estimation from photograph		65s-171/50t	14	2	4adcca53-019b-46c9-8e04-a113fc0c4cdf
20247181149171	20247181149171	2024	7	18	9	53	65s	2024	7	18	11	49	171	21		Seed plant	MUS_420		Polystachia mauritiana s.l.	orchidaceae	Valid	6 to 8									vegetating								main trunk	Juvenile/Sapling	842-860, 862	total number of juveniles based on estimation from photograph		65s-171/50u	14	2	4adcca53-019b-46c9-8e04-a113fc0c4cdf
20247181149171	20247181149171	2024	7	18	9	53	65s	2024	7	18	11	49	171	22		Seed plant	MUS_421		Polystachia mauritiana s.l.	orchidaceae	Valid	6 to 8									vegetating								main trunk	Juvenile/Sapling	842-860, 862	total number of juveniles based on estimation from photograph		65s-171/50v	14	2	4adcca53-019b-46c9-8e04-a113fc0c4cdf
20247181149171	20247181149171	2024	7	18	9	53	65s	2024	7	18	11	49	171	23		Seed plant	MUS_422		Polystachia mauritiana s.l.	orchidaceae	Valid	6 to 8									vegetating								main trunk	Juvenile/Sapling	842-860, 862	total number of juveniles based on estimation from photograph		65s-171/50w	14	2	4adcca53-019b-46c9-8e04-a113fc0c4cdf
20247181149171	20247181149171	2024	7	18	9	53	65s	2024	7	18	11	49	171	24		Seed plant	MUS_423		Polystachia mauritiana s.l.	orchidaceae	Valid	6 to 8									vegetating								main trunk	Juvenile/Sapling	842-860, 862	total number of juveniles based on estimation from photograph		65s-171/50x	14	2	4adcca53-019b-46c9-8e04-a113fc0c4cdf
20247181149171	20247181149171	2024	7	18	9	53	65s	2024	7	18	11	49	171	25		Seed plant	MUS_424		Polystachia mauritiana s.l.	orchidaceae	Valid	6 to 8									vegetating								main trunk	Juvenile/Sapling	842-860, 862	total number of juveniles based on estimation from photograph		65s-171/50y	14	2	4adcca53-019b-46c9-8e04-a113fc0c4cdf
20247181149171	20247181149171	2024	7	18	9	53	65s	2024	7	18	11	49	171	26		Seed plant	MUS_425		Polystachia mauritiana s.l.	orchidaceae	Valid	6 to 8									vegetating								main trunk	Juvenile/Sapling	842-860, 862	total number of juveniles based on estimation from photograph		65s-171/50z	14	2	4adcca53-019b-46c9-8e04-a113fc0c4cdf
20247181149171	20247181149171	2024	7	18	9	53	65s	2024	7	18	11	49	171	27		Seed plant	MUS_426		Polystachia mauritiana s.l.	orchidaceae	Valid	6 to 8									vegetating								main trunk	Juvenile/Sapling	842-860, 862	total number of juveniles based on estimation from photograph		65s-171/50za	14	2	4adcca53-019b-46c9-8e04-a113fc0c4cdf
20247181149171	20247181149171	2024	7	18	9	53	65s	2024	7	18	11	49	171	28		Seed plant	MUS_427		Polystachia mauritiana s.l.	orchidaceae	Valid	6 to 8									vegetating								main trunk	Juvenile/Sapling	842-860, 862	total number of juveniles based on estimation from photograph		65s-171/50zb	14	2	4adcca53-019b-46c9-8e04-a113fc0c4cdf
20247181149171	20247181149171	2024	7	18	9	53	65s	2024	7	18	11	49	171	29		Seed plant	MUS_428		Polystachia mauritiana s.l.	orchidaceae	Valid	6 to 8									vegetating								main trunk	Juvenile/Sapling	842-860, 862	total number of juveniles based on estimation from photograph		65s-171/50zc	14	2	4adcca53-019b-46c9-8e04-a113fc0c4cdf
20247181149171	20247181149171	2024	7	18	9	53	65s	2024	7	18	11	49	171	30		Seed plant	MUS_429		Polystachia mauritiana s.l.	orchidaceae	Valid	6 to 8									vegetating								main trunk	Juvenile/Sapling	842-860, 862	total number of juveniles based on estimation from photograph		65s-171/50zd	14	2	4adcca53-019b-46c9-8e04-a113fc0c4cdf
20247181149171	20247181149171	2024	7	18	9	53	65s	2024	7	18	11	49	171	31		Seed plant	MUS_430		Polystachia mauritiana s.l.	orchidaceae	Valid	6 to 8									vegetating								main trunk	Juvenile/Sapling	842-860, 862	total number of juveniles based on estimation from photograph		65s-171/50ze	14	2	4adcca53-019b-46c9-8e04-a113fc0c4cdf
20247181149171	20247181149171	2024	7	18	9	53	65s	2024	7	18	11	49	171	32		Seed plant	MUS_431		Polystachia mauritiana s.l.	orchidaceae	Valid	6 to 8									vegetating								main trunk	Juvenile/Sapling	842-860, 862	total number of juveniles based on estimation from photograph		65s-171/50zf	14	2	4adcca53-019b-46c9-8e04-a113fc0c4cdf
20247181149171	20247181149171	2024	7	18	9	53	65s	2024	7	18	11	49	171	33		Seed plant	MUS_432		Polystachia mauritiana s.l.	orchidaceae	Valid	6 to 8									vegetating								main trunk	Juvenile/Sapling	842-860, 862	total number of juveniles based on estimation from photograph		65s-171/50zg	14	2	4adcca53-019b-46c9-8e04-a113fc0c4cdf
20247181149171	20247181149171	2024	7	18	9	53	65s	2024	7	18	11	49	171	34		Seed plant	MUS_433		Polystachia mauritiana s.l.	orchidaceae	Valid	6 to 8									vegetating								main trunk	Juvenile/Sapling	842-860, 862	total number of juveniles based on estimation from photograph		65s-171/50zh	14	2	4adcca53-019b-46c9-8e04-a113fc0c4cdf
20247181149171	20247181149171	2024	7	18	9	53	65s	2024	7	18	11	49	171	35		Seed plant	MUS_434		Polystachia mauritiana s.l.	orchidaceae	Valid	6 to 8									vegetating								main trunk	Juvenile/Sapling	842-860, 862	total number of juveniles based on estimation from photograph		65s-171/50zi	14	2	4adcca53-019b-46c9-8e04-a113fc0c4cdf
20247181149171	20247181149171	2024	7	18	9	53	65s	2024	7	18	11	49	171	36		Seed plant	MUS_435		Polystachia mauritiana s.l.	orchidaceae	Valid	6 to 8									vegetating								main trunk	Juvenile/Sapling	842-860, 862	total number of juveniles based on estimation from photograph		65s-171/50zj	14	2	4adcca53-019b-46c9-8e04-a113fc0c4cdf
20247181149171	20247181149171	2024	7	18	9	53	65s	2024	7	18	11	49	171	37		Seed plant	MUS_436		Polystachia mauritiana s.l.	orchidaceae	Valid	6 to 8									vegetating								main trunk	Juvenile/Sapling	842-860, 862	total number of juveniles based on estimation from photograph		65s-171/50zk	14	2	4adcca53-019b-46c9-8e04-a113fc0c4cdf
20247181149171	20247181149171	2024	7	18	9	53	65s	2024	7	18	11	49	171	38		Seed plant	MUS_437		Polystachia mauritiana s.l.	orchidaceae	Valid	6 to 8									vegetating								main trunk	Juvenile/Sapling	842-860, 862	total number of juveniles based on estimation from photograph		65s-171/50zl	14	2	4adcca53-019b-46c9-8e04-a113fc0c4cdf
20247181149171	20247181149171	2024	7	18	9	53	65s	2024	7	18	11	49	171	39		Seed plant	MUS_438		Polystachia mauritiana s.l.	orchidaceae	Valid	6 to 8									vegetating								main trunk	Juvenile/Sapling	842-860, 862	total number of juveniles based on estimation from photograph		65s-171/50zm	14	2	4adcca53-019b-46c9-8e04-a113fc0c4cdf
20247181149171	20247181149171	2024	7	18	9	53	65s	2024	7	18	11	49	171	40		Seed plant	MUS_439		Polystachia mauritiana s.l.	orchidaceae	Valid	6 to 8									vegetating								main trunk	Juvenile/Sapling	842-860, 862	total number of juveniles based on estimation from photograph		65s-171/50zn	14	2	4adcca53-019b-46c9-8e04-a113fc0c4cdf
20247181149171	20247181149171	2024	7	18	9	53	65s	2024	7	18	11	49	171	41		Seed plant	MUS_440		Polystachia mauritiana s.l.	orchidaceae	Valid	6 to 8									vegetating								main trunk	Juvenile/Sapling	842-860, 862	total number of juveniles based on estimation from photograph		65s-171/50zo	14	2	4adcca53-019b-46c9-8e04-a113fc0c4cdf
20247181149171	20247181149171	2024	7	18	9	53	65s	2024	7	18	11	49	171	42		Seed plant	MUS_441		Polystachia mauritiana s.l.	orchidaceae	Valid	6 to 8									vegetating								main trunk	Juvenile/Sapling	842-860, 862	total number of juveniles based on estimation from photograph		65s-171/50zp	14	2	4adcca53-019b-46c9-8e04-a113fc0c4cdf
20247181149171	20247181149171	2024	7	18	9	53	65s	2024	7	18	11	49	171	43		Seed plant	MUS_442		Polystachia mauritiana s.l.	orchidaceae	Valid	6 to 8									vegetating								main trunk	Juvenile/Sapling	842-860, 862	total number of juveniles based on estimation from photograph		65s-171/50zq	14	2	4adcca53-019b-46c9-8e04-a113fc0c4cdf
20247181149171	20247181149171	2024	7	18	9	53	65s	2024	7	18	11	49	171	44		Seed plant	MUS_443		Polystachia mauritiana s.l.	orchidaceae	Valid	6 to 8									vegetating								main trunk	Juvenile/Sapling	842-860, 862	total number of juveniles based on estimation from photograph		65s-171/50zr	14	2	4adcca53-019b-46c9-8e04-a113fc0c4cdf
20247181149171	20247181149171	2024	7	18	9	53	65s	2024	7	18	11	49	171	45		Seed plant	MUS_444		Polystachia mauritiana s.l.	orchidaceae	Valid	6 to 8									vegetating								main trunk	Juvenile/Sapling	842-860, 862	total number of juveniles based on estimation from photograph		65s-171/50zs	14	2	4adcca53-019b-46c9-8e04-a113fc0c4cdf
20247181149171	20247181149171	2024	7	18	9	53	65s	2024	7	18	11	49	171	46		Seed plant	MUS_445		Polystachia mauritiana s.l.	orchidaceae	Valid	6 to 8									vegetating								main trunk	Juvenile/Sapling	842-860, 862	total number of juveniles based on estimation from photograph		65s-171/50zt	14	2	4adcca53-019b-46c9-8e04-a113fc0c4cdf
20247181149171	20247181149171	2024	7	18	9	53	65s	2024	7	18	11	49	171	47		Seed plant	MUS_446		Polystachia mauritiana s.l.	orchidaceae	Valid	6 to 8									vegetating								main trunk	Juvenile/Sapling	842-860, 862	total number of juveniles based on estimation from photograph		65s-171/50zx	14	2	4adcca53-019b-46c9-8e04-a113fc0c4cdf
20247181149171	20247181149171	2024	7	18	9	53	65s	2024	7	18	11	49	171	48		Seed plant	MUS_447		Polystachia mauritiana s.l.	orchidaceae	Valid	6 to 8									vegetating								main trunk	Juvenile/Sapling	842-860, 862	total number of juveniles based on estimation from photograph		65s-171/50zy	14	2	4adcca53-019b-46c9-8e04-a113fc0c4cdf
20247181149171	20247181149171	2024	7	18	9	53	65s	2024	7	18	11	49	171	49		Seed plant	MUS_448		Polystachia mauritiana s.l.	orchidaceae	Valid	6 to 8									vegetating								main trunk	Juvenile/Sapling	842-860, 862	total number of juveniles based on estimation from photograph		65s-171/50zz	14	2	4adcca53-019b-46c9-8e04-a113fc0c4cdf
20247181149171	20247181149171	2024	7	18	9	53	65s	2024	7	18	11	49	171	50		Seed plant	MUS_449		Polystachia mauritiana s.l.	orchidaceae	Valid	6 to 8									vegetating								main trunk	Juvenile/Sapling	842-860, 862	total number of juveniles based on estimation from photograph		65s-171/50zza	14	2	4adcca53-019b-46c9-8e04-a113fc0c4cdf
20247181149171	20247181149171	2024	7	18	9	53	65s	2024	7	18	11	49	171	51		Seed plant	MUS_450		Polystachia mauritiana s.l.	orchidaceae	Valid	6 to 8									vegetating								main trunk	Juvenile/Sapling	842-860, 862	total number of juveniles based on estimation from photograph		65s-171/50zzb	14	2	4adcca53-019b-46c9-8e04-a113fc0c4cdf
20247181149171	20247181149171	2024	7	18	9	53	65s	2024	7	18	11	49	171	52		Seed plant	MUS_451		Polystachia mauritiana s.l.	orchidaceae	Valid	6 to 8									vegetating								main trunk	Juvenile/Sapling	842-860, 862	total number of juveniles based on estimation from photograph		65s-171/50zzc	14	2	4adcca53-019b-46c9-8e04-a113fc0c4cdf
20247181149171	20247181149171	2024	7	18	9	53	65s	2024	7	18	11	49	171	53		Seed plant	MUS_452		Polystachia mauritiana s.l.	orchidaceae	Valid	6 to 8									vegetating								main trunk	Juvenile/Sapling	842-860, 862	total number of juveniles based on estimation from photograph		65s-171/50zzd	14	2	4adcca53-019b-46c9-8e04-a113fc0c4cdf
20247181149171	20247181149171	2024	7	18	9	53	65s	2024	7	18	11	49	171	54		Seed plant	MUS_453		Polystachia mauritiana s.l.	orchidaceae	Valid	6 to 8									vegetating								main trunk	Juvenile/Sapling	842-860, 862	total number of juveniles based on estimation from photograph		65s-171/50zze	14	2	4adcca53-019b-46c9-8e04-a113fc0c4cdf
20247181149171	20247181149171	2024	7	18	9	53	65s	2024	7	18	11	49	171	55		Seed plant	MUS_454		Polystachia mauritiana s.l.	orchidaceae	Valid	6 to 8									vegetating								main trunk	Juvenile/Sapling	842-860, 862	total number of juveniles based on estimation from photograph		65s-171/50zzf	14	2	4adcca53-019b-46c9-8e04-a113fc0c4cdf
20247181149171	20247181149171	2024	7	18	9	53	65s	2024	7	18	11	49	171	56		Seed plant	MUS_455		Polystachia mauritiana s.l.	orchidaceae	Valid	6 to 8									vegetating								main trunk	Juvenile/Sapling	842-860, 862	total number of juveniles based on estimation from photograph		65s-171/50zzg	14	2	4adcca53-019b-46c9-8e04-a113fc0c4cdf
20247181149171	20247181149171	2024	7	18	9	53	65s	2024	7	18	11	49	171	57		Seed plant	MUS_456		Polystachia mauritiana s.l.	orchidaceae	Valid	6 to 8									vegetating								main trunk	Juvenile/Sapling	842-860, 862	total number of juveniles based on estimation from photograph		65s-171/50zzh	14	2	4adcca53-019b-46c9-8e04-a113fc0c4cdf
20247181149171	20247181149171	2024	7	18	9	53	65s	2024	7	18	11	49	171	58		Seed plant	MUS_457		Polystachia mauritiana s.l.	orchidaceae	Valid	6 to 8									vegetating								main trunk	Juvenile/Sapling	842-860, 862	total number of juveniles based on estimation from photograph		65s-171/50zzi	14	2	4adcca53-019b-46c9-8e04-a113fc0c4cdf
20247181149171	20247181149171	2024	7	18	9	53	65s	2024	7	18	11	49	171	59		Seed plant	MUS_458		Polystachia mauritiana s.l.	orchidaceae	Valid	6 to 8									vegetating								main trunk	Juvenile/Sapling	842-860, 862	total number of juveniles based on estimation from photograph		65s-171/50zzj	14	2	4adcca53-019b-46c9-8e04-a113fc0c4cdf
20247181149171	20247181149171	2024	7	18	9	53	65s	2024	7	18	11	49	171	60		Seed plant	MUS_459		Polystachia mauritiana s.l.	orchidaceae	Valid	6 to 8									vegetating								main trunk	Juvenile/Sapling	842-860, 862	total number of juveniles based on estimation from photograph		65s-171/50zzk	14	2	4adcca53-019b-46c9-8e04-a113fc0c4cdf
20247181149171	20247181149171	2024	7	18	9	53	65s	2024	7	18	11	49	171	1		Seed plant	MUS_397		Angraecum sp.	orchidaceae	Valid	10									vegetating	7						2	crown	Adult	862			65s-171/51	14	4	b6b0aede-6266-4692-8f4a-79464c9447ef
20247181149171	20247181149171	2024	7	18	9	53	65s	2024	7	18	11	49	171	1		Seed plant	MUS_397		Angraecum pectinatum	orchidaceae	Valid	11							false		vegetating							2	crown	Adult	863-864	on branch 4	vegetating	65s-171/52	14	4	20b5829e-47d7-4c5e-862d-1ac50f79e780
20247181149171	20247181149171	2024	7	18	9	53	65s	2024	7	18	11	49	171	1		Seed plant	MUS_397		Angraecum pectinatum	orchidaceae	Valid	11							false		vegetating							2	crown	Adult	863-864	on branch 3	vegetating	65s-171/52	14	4	20b5829e-47d7-4c5e-862d-1ac50f79e780
20247181149171	20247181149171	2024	7	18	9	53	65s	2024	7	18	11	49	171	1		Seed plant	MUS_400		Angraecum sp.	orchidaceae	Valid										ripe fruit	5		2					crown	Adult	865-873	Orchids on first branch from 6 to 8m, orientation 180 or up		65s-171/53	14	10	fedd7676-30d4-4f01-94f6-01c9b81a3040
20247181149171	20247181149171	2024	7	18	9	53	65s	2024	7	18	11	49	171	1		Seed plant	MUS_400		Angraecum pectinatum	orchidaceae	Valid										vegetating								crown	Adult	865-873	Orchids on first branch from 6 to 8m, orientation 180 or up		65s-171/53b	14	10	fedd7676-30d4-4f01-94f6-01c9b81a3040
20247181149171	20247181149171	2024	7	18	9	53	65s	2024	7	18	11	49	171	1		Seed plant	MUS_400		Angraecum pectinatum	orchidaceae	Valid										vegetating	4							crown	Adult	865-873	Orchids on first branch from 6 to 8m, orientation 180 or up		65s-171/53c	14	10	fedd7676-30d4-4f01-94f6-01c9b81a3040
20247181149171	20247181149171	2024	7	18	9	53	65s	2024	7	18	11	49	171	1		Seed plant	MUS_400		Angraecum pectinatum	orchidaceae	Valid										vegetating	6							crown	Adult	865-873	Orchids on first branch from 6 to 8m, orientation 180 or up		65s-171/53d	14	10	fedd7676-30d4-4f01-94f6-01c9b81a3040
20247181149171	20247181149171	2024	7	18	9	53	65s	2024	7	18	11	49	171	1		Seed plant	MUS_400		Angraecum pectinatum	orchidaceae	Valid										vegetating	4							crown	Adult	865-873	Orchids on first branch from 6 to 8m, orientation 180 or up		65s-171/53e	14	10	fedd7676-30d4-4f01-94f6-01c9b81a3040
20247181149171	20247181149171	2024	7	18	9	53	65s	2024	7	18	11	49	171	1		Seed plant	MUS_400		Angraecum pectinatum	orchidaceae	Valid										vegetating	8							crown	Adult	865-873	Orchids on first branch from 6 to 8m, orientation 180 or up		65s-171/53f	14	10	fedd7676-30d4-4f01-94f6-01c9b81a3040
20247181149171	20247181149171	2024	7	18	9	53	65s	2024	7	18	11	49	171	1		Seed plant	MUS_400		Angraecum pectinatum	orchidaceae	Valid										vegetating	10							crown	Adult	865-873	Orchids on first branch from 6 to 8m, orientation 180 or up		65s-171/53g	14	10	fedd7676-30d4-4f01-94f6-01c9b81a3040
20247181149171	20247181149171	2024	7	18	9	53	65s	2024	7	18	11	49	171	1		Seed plant	MUS_400		Angraecum pectinatum	orchidaceae	Valid										vegetating	4							crown	Adult	865-873	Orchids on first branch from 6 to 8m, orientation 180 or up		65s-171/53h	14	10	fedd7676-30d4-4f01-94f6-01c9b81a3040
20247181149171	20247181149171	2024	7	18	9	53	65s	2024	7	18	11	49	171	1		Seed plant	MUS_400		Angraecum pectinatum	orchidaceae	Valid										vegetating	4							crown	Adult	865-873	Orchids on first branch from 6 to 8m, orientation 180 or up		65s-171/53i	14	10	fedd7676-30d4-4f01-94f6-01c9b81a3040
20247181149171	20247181149171	2024	7	18	9	53	65s	2024	7	18	11	49	171	1		Seed plant	MUS_400		Angraecum pectinatum	orchidaceae	Valid										vegetating	14		0					crown	Adult	874-883	Orchid on 1st branch from 6 to 5m, orientated up		65s-171/54	14	15	f12ec00f-d07b-483f-a739-a0b909249ef4
20247181149171	20247181149171	2024	7	18	9	53	65s	2024	7	18	11	49	171	1		Seed plant	MUS_400		Angraecum pectinatum	orchidaceae	Valid										vegetating	5		0					crown	Juvenile/Sapling	874-883	Orchid on 1st branch from 6 to 5m, orientated up		65s-171/54b	14	15	f12ec00f-d07b-483f-a739-a0b909249ef4
20247181149171	20247181149171	2024	7	18	9	53	65s	2024	7	18	11	49	171	1		Seed plant	MUS_400		Angraecum pectinatum	orchidaceae	Valid										flower bud	14							crown	Adult	874-883	Orchid on 1st branch from 6 to 5m, orientated up		65s-171/54c	14	15	f12ec00f-d07b-483f-a739-a0b909249ef4
20247181149171	20247181149171	2024	7	18	9	53	65s	2024	7	18	11	49	171	1		Seed plant	MUS_400		Angraecum pectinatum	orchidaceae	Valid										vegetating	4							crown	Juvenile/Sapling	874-883	Orchid on 1st branch from 6 to 5m, orientated up		65s-171/54d	14	15	f12ec00f-d07b-483f-a739-a0b909249ef4
20247181149171	20247181149171	2024	7	18	9	53	65s	2024	7	18	11	49	171	1		Seed plant	MUS_400		Angraecum pectinatum	orchidaceae	Valid										vegetating	2		0					crown	Juvenile/Sapling	874-883	Orchid on 1st branch from 6 to 5m, orientated up		65s-171/54e	14	15	f12ec00f-d07b-483f-a739-a0b909249ef4
20247181149171	20247181149171	2024	7	18	9	53	65s	2024	7	18	11	49	171	1		Seed plant	MUS_400		Angraecum pectinatum	orchidaceae	Valid										vegetating	5		0					crown	Juvenile/Sapling	874-883	Orchid on 1st branch from 6 to 5m, orientated up		65s-171/54f	14	15	f12ec00f-d07b-483f-a739-a0b909249ef4
20247181149171	20247181149171	2024	7	18	9	53	65s	2024	7	18	11	49	171	1		Seed plant	MUS_400		Angraecum pectinatum	orchidaceae	Valid										vegetating	9		0					crown	Adult	874-883	Orchid on 1st branch from 6 to 5m, orientated up		65s-171/54g	14	15	f12ec00f-d07b-483f-a739-a0b909249ef4
20247181149171	20247181149171	2024	7	18	9	53	65s	2024	7	18	11	49	171	1		Seed plant	MUS_400		Angraecum pectinatum	orchidaceae	Valid										vegetating	5		0					crown	Juvenile/Sapling	874-883	Orchid on 1st branch from 6 to 5m, orientated up		65s-171/54h	14	15	f12ec00f-d07b-483f-a739-a0b909249ef4
20247181149171	20247181149171	2024	7	18	9	53	65s	2024	7	18	11	49	171	1		Seed plant	MUS_400		Angraecum pectinatum	orchidaceae	Valid										vegetating	9							crown	Adult	874-883	Orchid on 1st branch from 6 to 5m, orientated up		65s-171/54i	14	15	f12ec00f-d07b-483f-a739-a0b909249ef4
20247181149171	20247181149171	2024	7	18	9	53	65s	2024	7	18	11	49	171	1		Seed plant	MUS_400		Angraecum pectinatum	orchidaceae	Valid										vegetating								crown	Adult	874-883	Orchid on 1st branch from 6 to 5m, orientated up		65s-171/54j	14	15	f12ec00f-d07b-483f-a739-a0b909249ef4
20247181149171	20247181149171	2024	7	18	9	53	65s	2024	7	18	11	49	171	1		Seed plant	MUS_400		Angraecum pectinatum	orchidaceae	Valid										vegetating								crown	Adult	874-883	Orchid on 1st branch from 6 to 5m, orientated up		65s-171/54k	14	15	f12ec00f-d07b-483f-a739-a0b909249ef4
2024726851166	2024726851166	2024	7	26	8	50	65s	2024	7	26	8	51	166	2		Fern	FERN_173		Microsorum punctatum	Polypodiaceae	seedling	0.14	76	0.5	1.4	0.8	0.9	0.4	false	0	vegetating	2		0		0		1	main trunk	Juvenile/Sapling	103-0894		vegetating	65s-166/1	9	3	017ad51e-fefb-4bd5-90a2-a5cd44a69d03
2024726851166	2024726851166	2024	7	26	8	50	65s	2024	7	26	8	51	166	2		Fern	FERN_173		Microsorum punctatum	Polypodiaceae	seedling	0.11	90	1.4	0.8	0.4	0.9	0.3	false	0	vegetating	2				0		1	main trunk	Juvenile/Sapling	895		vegetating	65s-166/2	9	11	529b7fac-bb2a-4cb6-80e5-cbd310a72a5e
2024726851166	2024726851166	2024	7	26	8	50	65s	2024	7	26	8	51	166	2		Fern	FERN_173		Microsorum punctatum	Polypodiaceae	seedling	0.28	90	1.5	1.1	0.4	0.8	0.5	false	0	vegetating	4				0		1	main trunk	Juvenile/Sapling	896		vegetating	65s-166/3	9	15	564f8745-2c8a-4135-a674-1c995a2167cb
2024726851166	2024726851166	2024	7	26	8	50	65s	2024	7	26	8	51	166	2		Fern	FERN_173		Microsorum punctatum	Polypodiaceae	seedling	0.36	90	0.5	1	0.8	0.8	0.3	false	0	vegetating	3				0		1	main trunk	Juvenile/Sapling	899		vegetating	65s-166/4	9	18	65531f7f-d771-40fd-bb73-c6f11a77661a
2024726851166	2024726851166	2024	7	26	8	50	65s	2024	7	26	8	51	166	1		Seed plant	MUS_383		Angraecum sp.	orchidaceae	Valid	1.3	220	2.5	5.5	6.3	5	0.5	false	0	vegetating	6	0	0				1	main trunk	Adult	902		vegetating	65s-166/5	9	22	f7417b17-2549-4037-a90d-62b203c486f0
2024726851166	2024726851166	2024	7	26	8	50	65s	2024	7	26	8	51	166	1		Seed plant	MUS_383		Angraecum sp.	orchidaceae	Valid	1.3	220	3	5	5.5	4.5	0.5	false	0	vegetating	4	0	0				1	main trunk	Adult	901-902		vegetating	65s-166/6	9	26	a5ab4ac1-feb8-42da-b950-0e9410d15b7b
2024726851166	2024726851166	2024	7	26	8	50	65s	2024	7	26	8	51	166	1		Seed plant	MUS_383		Angraecum sp.	orchidaceae	Valid	1.35	220	357	5	7	4.8	0.5	false	0	dry/fallen fruit	3						1	main trunk	Adult	903-905		vegetating	65s-166/7	9	30	21b0540a-d2f4-433c-b967-e4e7aa30e684
2024726851166	2024726851166	2024	7	26	8	50	65s	2024	7	26	8	51	166	1		Seed plant	MUS_397		Angraecum pectinatum	orchidaceae	Valid	2.2	210						false	0	vegetating	6	0	0				1	main trunk	Juvenile/Sapling	906		vegetating	65s-166/8	9	34	566d2d0c-d3d6-4f9a-8de0-63b8db7904cb
2024726851166	2024726851166	2024	7	26	8	50	65s	2024	7	26	8	51	166	1		Seed plant	MUS_397		Angraecum pectinatum	orchidaceae	Valid	2.2	210						false		vegetating	4	0	0				1	main trunk	Juvenile/Sapling	907		vegetating	65s-166/9	9	36	03143bec-0134-4865-944b-485e29755ada
2024726851166	2024726851166	2024	7	26	8	50	65s	2024	7	26	8	51	166	1		Seed plant	MUS_397		Angraecum pectinatum	orchidaceae	Valid	2.2	210						false	0	vegetating	4						1	main trunk	Juvenile/Sapling	908		vegetating	65s-166/10	9	39	953b93b3-eccc-4f52-9ea5-1b320c78ea05
2024726851166	2024726851166	2024	7	26	8	50	65s	2024	7	26	8	51	166	1		Seed plant	MUS_397		Angraecum pectinatum	orchidaceae	Valid	2.4	230						false	0	vegetating	3	0	0				1	main trunk	Juvenile/Sapling	909		vegetating	65s-166/11	9	42	dc7ca198-45a4-498c-9fc1-d0b76c288680
2024726851166	2024726851166	2024	7	26	8	50	65s	2024	7	26	8	51	166	1		Seed plant	MUS_397		Angraecum pectinatum	orchidaceae	Valid	3.1	230						false	0	vegetating	6	0	0				1	main trunk	Subadult	911		vegetating	65s-166/12	9	45	5d3ab66a-899c-456d-bc1e-2ffbd3ac3fb6
2024726851166	2024726851166	2024	7	26	8	50	65s	2024	7	26	8	51	166	1		Seed plant	MUS_397		Angraecum pectinatum	orchidaceae	Valid	3.2	230						false	0	vegetating	8	0	0				1	main trunk	Adult	912		vegetating	65s-166/13	9	47	e09e2b68-ab1b-4ebe-be29-3891ce8626a4
2024726851166	2024726851166	2024	7	26	8	50	65s	2024	7	26	8	51	166	1		Seed plant	MUS_400		Angraecum pectinatum	orchidaceae	Valid	3.3	236						false	0	vegetating	4	0	0				1	main trunk	Subadult	913		vegetating	65s-166/14	9	50	e75742e7-f1e7-466e-b891-ad9d198af0a7
2024726851166	2024726851166	2024	7	26	8	50	65s	2024	7	26	8	51	166	1		Seed plant	MUS_397		Angraecum pectinatum	orchidaceae	Valid	3.5	236						false	0	vegetating	14	0	0				1	main trunk	Adult	914		vegetating	65s-166/15	9	53	a274f08d-8e2c-404c-aedf-0fb14d19005a
2024726851166	2024726851166	2024	7	26	8	50	65s	2024	7	26	8	51	166	1		Seed plant	MUS_397		Angraecum pectinatum	orchidaceae	Valid	3.5	237						false	0	vegetating	5	0	0				1	main trunk	Juvenile/Sapling	914		vegetating	65s-166/16	9	54	318a70f5-db71-43e4-8027-35b82aa4e60d
2024726851166	2024726851166	2024	7	26	8	50	65s	2024	7	26	8	51	166	1		Seed plant	MUS_397		Angraecum pectinatum	orchidaceae	Valid	4	210						false	0	vegetating	7	0	0				1	main trunk	Adult	916		vegetating	65s-166/17	9	56	7c797896-a477-4032-940d-968a8651efb1
2024726851166	2024726851166	2024	7	26	8	50	65s	2024	7	26	8	51	166	1		Seed plant	MUS_397		Angraecum pectinatum	orchidaceae	Valid	4	210						false	0	vegetating	11	0	0				1	main trunk	Adult	916		vegetating	65s-166/18	9	59	47803dbf-0129-45cc-ae05-32b0d07613b3
2024726851166	2024726851166	2024	7	26	8	50	65s	2024	7	26	8	51	166	1		Seed plant	MUS_397		Angraecum pectinatum	orchidaceae	Valid	4.2	210						false	0	vegetating	4	0	0				1	main trunk	Juvenile/Sapling	917		vegetating	65s-166/19	10	3	15eec90d-dd7a-494a-b523-a5d75af6ebda
2024726851166	2024726851166	2024	7	26	8	50	65s	2024	7	26	8	51	166	1		Seed plant	MUS_397		Angraecum pectinatum	orchidaceae	Valid	4.3	270						false	0	vegetating		0	0				1	main trunk		918		vegetating	65s-166/20	10	5	f8e54ef7-27ce-44ca-bdab-e88635b4c240
2024726851166	2024726851166	2024	7	26	8	50	65s	2024	7	26	8	51	166	1		Seed plant	MUS_397		Angraecum pectinatum	orchidaceae	Valid	4.35	270						false	0	vegetating		0	0				1	main trunk		918		vegetating	65s-166/20b	10	5	f8e54ef7-27ce-44ca-bdab-e88635b4c2401
2024726851166	2024726851166	2024	7	26	8	50	65s	2024	7	26	8	51	166	1		Seed plant	MUS_397		Angraecum pectinatum	orchidaceae	Valid	4.4	270						false	0	vegetating	17	0	0				1	main trunk		918		vegetating	65s-166/20c	10	5	f8e54ef7-27ce-44ca-bdab-e88635b4c2402
2024726851166	2024726851166	2024	7	26	8	50	65s	2024	7	26	8	51	166	1		Seed plant	MUS_397		Angraecum pectinatum	orchidaceae	Valid	4.45	270						false	0	vegetating		0	0				1	main trunk		918		vegetating	65s-166/20d	10	5	f8e54ef7-27ce-44ca-bdab-e88635b4c2403
2024726851166	2024726851166	2024	7	26	8	50	65s	2024	7	26	8	51	166	1		Seed plant	MUS_397		Angraecum pectinatum	orchidaceae	Valid	4.5	270						false	0	vegetating	9	0	0				1	main trunk		918		vegetating	65s-166/20e	10	5	f8e54ef7-27ce-44ca-bdab-e88635b4c2404
2024726851166	2024726851166	2024	7	26	8	50	65s	2024	7	26	8	51	166	1		Seed plant	MUS_397		Angraecum pectinatum	orchidaceae	Valid	4	290						false	0	vegetating							1	main trunk			between 4 and 4,6m		65s-166/21	10	9	774f95cc-a7fd-4445-8a9c-fbdc3ce2e48a
2024726851166	2024726851166	2024	7	26	8	50	65s	2024	7	26	8	51	166	1		Seed plant	MUS_397		Angraecum pectinatum	orchidaceae	Valid	4	290						false	0	vegetating							1	main trunk			between 4 and 4,6m		65s-166/21b	10	9	774f95cc-a7fd-4445-8a9c-fbdc3ce2e48a1
2024726851166	2024726851166	2024	7	26	8	50	65s	2024	7	26	8	51	166	1		Seed plant	MUS_397		Angraecum pectinatum	orchidaceae	Valid	4.3	290						false	0	vegetating							1	main trunk			between 4 and 4,6m		65s-166/21c	10	9	774f95cc-a7fd-4445-8a9c-fbdc3ce2e48a2
2024726851166	2024726851166	2024	7	26	8	50	65s	2024	7	26	8	51	166	1		Seed plant	MUS_397		Angraecum pectinatum	orchidaceae	Valid	4.6	290						false	0	vegetating							1	main trunk			between 4 and 4,6m		65s-166/21d	10	9	774f95cc-a7fd-4445-8a9c-fbdc3ce2e48a3
2024726851166	2024726851166	2024	7	26	8	50	65s	2024	7	26	8	51	166	1		Seed plant	MUS_397		Angraecum pectinatum	orchidaceae	Valid	4.6	290						false	0	vegetating							1	main trunk			between 4 and 4,6m		65s-166/21e	10	9	774f95cc-a7fd-4445-8a9c-fbdc3ce2e48a4
2024726851166	2024726851166	2024	7	26	8	50	65s	2024	7	26	8	51	166	1		Seed plant	MUS_397		Angraecum pectinatum	orchidaceae	Valid	4.6	290						false	0	vegetating							1	main trunk			between 4 and 4,6m		65s-166/21f	10	9	774f95cc-a7fd-4445-8a9c-fbdc3ce2e48a5
2024726851166	2024726851166	2024	7	26	8	50	65s	2024	7	26	8	51	166	1		Seed plant	MUS_397		Angraecum pectinatum	orchidaceae	Valid	4.6	290						false	0	vegetating							1	main trunk			between 4 and 4,6m		65s-166/21g	10	9	774f95cc-a7fd-4445-8a9c-fbdc3ce2e48a6
2024726851166	2024726851166	2024	7	26	8	50	65s	2024	7	26	8	51	166	1		Seed plant	MUS_397		Angraecum pectinatum	orchidaceae	Valid	4.8	250						false	0	vegetating	24	0	0				1	main trunk	Adult	920		vegetating	65s-166/22	10	13	0331da4f-1ea3-468a-85e9-02d11753ca56
2024726851166	2024726851166	2024	7	26	8	50	65s	2024	7	26	8	51	166	1		Seed plant	MUS_397		Angraecum pectinatum	orchidaceae	Valid	4.8	250						false	0	vegetating	18	0	0				1	main trunk	Adult	921		vegetating	65s-166/23	10	15	cb0d642f-c50d-4277-a019-735a6fd4954a
2024726851166	2024726851166	2024	7	26	8	50	65s	2024	7	26	8	51	166	2		Fern	FERN_169		Lepisorus spicata	Polypodiaceae	Valid	4	100						false	0	vegetating	2	0	0				1	main trunk	Subadult	924		vegetating	65s-166/24	10	16	32ba4673-872b-43a2-a397-aed0591d43df
2024726851166	2024726851166	2024	7	26	8	50	65s	2024	7	26	8	51	166	2		Fern	FERN_173		Microsorum punctatum	Polypodiaceae	Valid	5	100						false	0	vegetating	3	0	0				1	main trunk	Subadult	925		vegetating	65s-166/25	10	18	7591cfd4-44ac-4660-8a4f-1f3d25439b47
2024726851166	2024726851166	2024	7	26	8	50	65s	2024	7	26	8	51	166	2		Fern	FERN_173		Microsorum punctatum	Polypodiaceae	Valid	5.2	100						false	0	vegetating	3				0		1	main trunk	Juvenile/Sapling	927		vegetating	65s-166/26	10	21	82465382-e1d4-4f37-b69f-3a4475f8a378
2024726851166	2024726851166	2024	7	26	8	50	65s	2024	7	26	8	51	166	2		Fern	FERN_173		Microsorum punctatum	Polypodiaceae	Valid	5.5	344						false	0	vegetating	1				0		2	crown	Juvenile/Sapling	928		vegetating	65s-166/27	10	24	e3bc151c-588f-4a01-ba46-0db4ad629b2d
2024726851166	2024726851166	2024	7	26	8	50	65s	2024	7	26	8	51	166	2		Fern	FERN_173		Microsorum punctatum	Polypodiaceae	Valid	5.5	344						false	0	vegetating	3	0			0		2	crown	Juvenile/Sapling	928		vegetating	65s-166/28	10	27	10a628b8-06f6-4361-b67f-1e42ba4edf24
2024726851166	2024726851166	2024	7	26	8	50	65s	2024	7	26	8	51	166	2		Fern	FERN_173		Microsorum punctatum	Polypodiaceae	Valid	5.5	100						false	0	vegetating	2	0	0				2	crown	Juvenile/Sapling	929		vegetating	65s-166/29	10	28	3175ce89-e5e0-4c63-8a8a-66004e1bd9fc
2024726851166	2024726851166	2024	7	26	8	50	65s	2024	7	26	8	51	166	1		Seed plant	MUS_400		Angraecum pectinatum	orchidaceae	Valid	6.5							false	0	vegetating	19	0	0				2	crown	Adult	930		vegetating	65s-166/30	10	31	e15142fc-94f1-471c-9589-d26222139fbe
2024726851166	2024726851166	2024	7	26	8	50	65s	2024	7	26	8	51	166	2		Fern	FERN_173		Microsorum punctatum	Polypodiaceae	Valid	5.5	276						false	0	vegetating	3						2	crown	Juvenile/Sapling	931		vegetating	65s-166/31	10	35	42242051-3de7-40bb-bee4-578f86334262
2024726851166	2024726851166	2024	7	26	8	50	65s	2024	7	26	8	51	166	2		Fern	FERN_173		Microsorum punctatum	Polypodiaceae	Valid	5.5	276						false	0	vegetating	1						2	crown	Juvenile/Sapling	931		vegetating	65s-166/32	10	37	352c3cef-ea3f-4e19-a87a-56a97f414933
2024726851166	2024726851166	2024	7	26	8	50	65s	2024	7	26	8	51	166	1		Seed plant	MUS_397		Angraecum pectinatum	orchidaceae	Valid	6							false		vegetating	8							crown	Juvenile/Sapling	932-933		vegetating	65s-166/33	10	39	78010c96-9caf-4bf3-82b7-e01f4a0361a7
2024726851166	2024726851166	2024	7	26	8	50	65s	2024	7	26	8	51	166	1		Seed plant	MUS_397		Angraecum pectinatum	orchidaceae	Valid	6							false		vegetating	3							crown	Juvenile/Sapling			vegetating	65s-166/33b	10	39	78010c96-9caf-4bf3-82b7-e01f4a0361a71
2024726851166	2024726851166	2024	7	26	8	50	65s	2024	7	26	8	51	166	1		Seed plant	MUS_397		Angraecum pectinatum	orchidaceae	Valid	6							false		vegetating	4							crown	Juvenile/Sapling			vegetating	65s-166/33c	10	39	78010c96-9caf-4bf3-82b7-e01f4a0361a72
2024726851166	2024726851166	2024	7	26	8	50	65s	2024	7	26	8	51	166	1		Seed plant	MUS_397		Angraecum pectinatum	orchidaceae	Valid	6							false		vegetating	2							crown	Juvenile/Sapling			vegetating	65s-166/33d	10	39	78010c96-9caf-4bf3-82b7-e01f4a0361a73
2024726851166	2024726851166	2024	7	26	8	50	65s	2024	7	26	8	51	166	2		Fern	FERN_169		Lepisorus spicata	Polypodiaceae	Valid	6	244						false	0	vegetating	2						2	crown	Subadult	934		vegetating	65s-166/34	10	40	ef4db97a-3395-4416-97b8-8fd91cfddf99
2024726851166	2024726851166	2024	7	26	8	50	65s	2024	7	26	8	51	166	2		Fern	FERN_173		Microsorum punctatum	Polypodiaceae	Valid	6	160						false	0	vegetating	3						2	crown	Juvenile/Sapling	935		vegetating	65s-166/35	10	42	0c1dc66b-a7ad-4458-8666-b46010d3c333
2024726851166	2024726851166	2024	7	26	8	50	65s	2024	7	26	8	51	166	1		Seed plant	MUS_397		Angraecum pectinatum	orchidaceae	Valid	6	280						false	1	vegetating	9							crown	Juvenile/Sapling	936			65s-166/36	10	45	d06b1c1d-e591-4bdd-ab7d-590ea33cf8dc
2024726851166	2024726851166	2024	7	26	8	50	65s	2024	7	26	8	51	166	1		Seed plant	MUS_397		Angraecum pectinatum	orchidaceae	Valid	6.1	280						false	2	vegetating	4							crown	Juvenile/Sapling	936			65s-166/36b	10	45	d06b1c1d-e591-4bdd-ab7d-590ea33cf8dc1
2024726851166	2024726851166	2024	7	26	8	50	65s	2024	7	26	8	51	166	1		Seed plant	MUS_397		Angraecum pectinatum	orchidaceae	Valid	6.2	280						false	3	vegetating	2							crown	Juvenile/Sapling	936			65s-166/36c	10	45	d06b1c1d-e591-4bdd-ab7d-590ea33cf8dc2
2024726851166	2024726851166	2024	7	26	8	50	65s	2024	7	26	8	51	166	1		Seed plant	MUS_397		Angraecum pectinatum	orchidaceae	Valid	6.3	280						false	4	vegetating	2							crown	Juvenile/Sapling	936			65s-166/36d	10	45	d06b1c1d-e591-4bdd-ab7d-590ea33cf8dc3
2024726851166	2024726851166	2024	7	26	8	50	65s	2024	7	26	8	51	166	1		Seed plant	MUS_397		Angraecum pectinatum	orchidaceae	Valid	6.4	280						false	5	vegetating								crown	Juvenile/Sapling	936			65s-166/36e	10	45	d06b1c1d-e591-4bdd-ab7d-590ea33cf8dc4
2024726851166	2024726851166	2024	7	26	8	50	65s	2024	7	26	8	51	166	1		Seed plant	MUS_397		Angraecum pectinatum	orchidaceae	Valid	6.5	280						false	6	vegetating	8							crown	Juvenile/Sapling	936			65s-166/36f	10	45	d06b1c1d-e591-4bdd-ab7d-590ea33cf8dc5
2024726851166	2024726851166	2024	7	26	8	50	65s	2024	7	26	8	51	166	1		Seed plant	MUS_397		Angraecum pectinatum	orchidaceae	Valid	6.5	280						false	7	vegetating	9							crown	Adult	937			65s-166/37	10	46	5790c74a-5fa6-40bb-9a92-1691d7a5e826
2024726851166	2024726851166	2024	7	26	8	50	65s	2024	7	26	8	51	166	1		Seed plant	MUS_397		Angraecum pectinatum	orchidaceae	Valid	6.5	280						false	7	flower bud								crown	Adult	937			65s-166/37b	10	46	5790c74a-5fa6-40bb-9a92-1691d7a5e8261
2024726851166	2024726851166	2024	7	26	8	50	65s	2024	7	26	8	51	166	1		Seed plant	MUS_397		Angraecum pectinatum	orchidaceae	Valid	7	280						false	8	flower bud								crown	Adult	937			65s-166/38	10	50	854a7cba-49df-4050-b566-8dc132594703
2024726851166	2024726851166	2024	7	26	8	50	65s	2024	7	26	8	51	166	1		Seed plant	MUS_397		Angraecum pectinatum	orchidaceae	Valid	7	280						false	8	vegetating								crown	Adult	937			65s-166/38b	10	50	854a7cba-49df-4050-b566-8dc132594704
2024726851166	2024726851166	2024	7	26	8	50	65s	2024	7	26	8	51	166	1		Seed plant	MUS_397		Angraecum pectinatum	orchidaceae	Valid	7	280						false	8	vegetating								crown	Adult	937			65s-166/38c	10	50	854a7cba-49df-4050-b566-8dc132594705
2024726851166	2024726851166	2024	7	26	8	50	65s	2024	7	26	8	51	166	2		Fern	FERN_173		Microsorum punctatum	Polypodiaceae	Valid	7	220						false	0	vegetating	6						2	crown	Subadult	939			65s-166/39	10	50	db2ffe7d-7232-4e1f-bfd1-6f2e142d9371
2024726851166	2024726851166	2024	7	26	8	50	65s	2024	7	26	8	51	166	2		Fern	FERN_173		Microsorum punctatum	Polypodiaceae	Valid	7	220						false	0	vegetating	2						2	crown	Juvenile/Sapling	940		vegetating	65s-166/40	10	52	8ef11ac6-a704-4b07-87ba-941aa8c4252e
2024726851166	2024726851166	2024	7	26	8	50	65s	2024	7	26	8	51	166	2		Fern	FERN_173		Microsorum punctatum	Polypodiaceae	Valid	7.3	280						false	0	vegetating							2	crown	Adult	942		vegetating	65s-166/41	10	54	712d4b47-30f0-4e93-a0ca-14bfe3342d8a
2024726851166	2024726851166	2024	7	26	8	50	65s	2024	7	26	8	51	166	1		Seed plant	MUS_397		Angraecum pectinatum	orchidaceae	Valid	7	280						false	1	unripe fruit	17	0	3					crown	Adult	943-948		fruiting	65s-166/42	10	56	ec8c838a-971e-461a-b532-aa3785d1c878
2024726851166	2024726851166	2024	7	26	8	50	65s	2024	7	26	8	51	166	1		Seed plant	MUS_397		Angraecum pectinatum	orchidaceae	Valid	7	280						false	2	vegetating	19							crown	Adult	943-948		vegetating	65s-166/42b	10	56	ec8c838a-971e-461a-b532-aa3785d1c8781
2024726851166	2024726851166	2024	7	26	8	50	65s	2024	7	26	8	51	166	1		Seed plant	MUS_397		Angraecum pectinatum	orchidaceae	Valid	7	280						false	3	vegetating								crown	Adult	943-948		vegetating	65s-166/42c	10	56	ec8c838a-971e-461a-b532-aa3785d1c8782
2024726851166	2024726851166	2024	7	26	8	50	65s	2024	7	26	8	51	166	1		Seed plant	MUS_397		Angraecum pectinatum	orchidaceae	Valid	7	280						false	4	vegetating								crown	Adult	943-948		vegetating	65s-166/42d	10	56	ec8c838a-971e-461a-b532-aa3785d1c8783
2024726851166	2024726851166	2024	7	26	8	50	65s	2024	7	26	8	51	166	1		Seed plant	MUS_397		Angraecum pectinatum	orchidaceae	Valid	7	280						false	5	vegetating								crown	Adult	943-948		vegetating	65s-166/42e	10	56	ec8c838a-971e-461a-b532-aa3785d1c8784
2024726851166	2024726851166	2024	7	26	8	50	65s	2024	7	26	8	51	166	1		Seed plant	MUS_397		Angraecum pectinatum	orchidaceae	Valid	7	280						false	6	vegetating	7							crown	Adult	943-948		vegetating	65s-166/42f	10	56	ec8c838a-971e-461a-b532-aa3785d1c8785
2024726851166	2024726851166	2024	7	26	8	50	65s	2024	7	26	8	51	166	1		Seed plant	MUS_397		Angraecum pectinatum	orchidaceae	Valid	7	280						false	7	vegetating	5							crown	Juvenile/Sapling	943-948		vegetating	65s-166/42g	10	56	ec8c838a-971e-461a-b532-aa3785d1c8786
2024726851166	2024726851166	2024	7	26	8	50	65s	2024	7	26	8	51	166	1		Seed plant	MUS_397		Angraecum pectinatum	orchidaceae	Valid	7	280						false	8	vegetating	2							crown	Juvenile/Sapling	943-948		vegetating	65s-166/42h	10	56	ec8c838a-971e-461a-b532-aa3785d1c8787
2024726851166	2024726851166	2024	7	26	8	50	65s	2024	7	26	8	51	166	1		Seed plant	MUS_397		Angraecum pectinatum	orchidaceae	Valid	7	280						false	9	vegetating	4							crown	Juvenile/Sapling	943-948		vegetating	65s-166/42i	10	56	ec8c838a-971e-461a-b532-aa3785d1c8788
2024726851166	2024726851166	2024	7	26	8	50	65s	2024	7	26	8	51	166	1		Seed plant	MUS_397		Angraecum pectinatum	orchidaceae	Valid	7	280						false	9	vegetating	5							crown	Juvenile/Sapling	943-948		vegetating	65s-166/42j	10	56	ec8c838a-971e-461a-b532-aa3785d1c8789
2024726124164	2024726124164	2024	7	26	8	50	65s	2024	7	26	12	4	164	1		Seed plant	MUS_508		Piper borbonense	Piperaceae	Valid								false	0	vegetating		0	0			0.65	1	main trunk	Adult	950		vegetating	65s-164/1	12	18	e73fe32a-6676-478e-a670-16b1a91d779a
2024726124164	2024726124164	2024	7	26	8	50	65s	2024	7	26	12	4	164	1		Seed plant	MUS_106		Cnestis polyphylla	Connaraceae	Valid								false	0	vegetating							1	main trunk	Adult	951	Crown as well	vegetating	65s-164/2	12	21	49b20551-9276-461a-adaf-9ded4f895947
2024726124164	2024726124164	2024	7	26	8	50	65s	2024	7	26	12	4	164	1		Seed plant	MUS_397		Angraecum pectinatum	orchidaceae	Valid	2.2	300						false	0	vegetating	5	0	0				1	main trunk	Juvenile/Sapling	953		vegetating	65s-164/4	12	27	33a10b02-bc05-4f4d-bffe-c4d2b94fbfe6
2024726124164	2024726124164	2024	7	26	8	50	65s	2024	7	26	12	4	164	1		Seed plant	MUS_397		Angraecum pectinatum	orchidaceae	Valid	2.4	300						false	0	vegetating	5	0	0				1	main trunk	Juvenile/Sapling	954		vegetating	65s-164/5	12	28	bc823beb-8f5b-415a-926f-80505ed76bb4
2024726124164	2024726124164	2024	7	26	8	50	65s	2024	7	26	12	4	164	1		Seed plant	MUS_397		Angraecum pectinatum	orchidaceae	Valid	2.4	300						false	0	vegetating	3	0	0				1	main trunk	Juvenile/Sapling	954			65s-164/	12	30	fb8a3900-0b06-4964-a32b-6532fd1c6f6e
2024726124164	2024726124164	2024	7	26	8	50	65s	2024	7	26	12	4	164	1		Seed plant	MUS_383		Angraecum sp.	orchidaceae	Valid	3	260						false	0	vegetating	2	0	0				1	main trunk	Juvenile/Sapling	956			65s-164/	12	31	7e886aa0-e713-44fb-ae4d-339f12745a69
2024726124164	2024726124164	2024	7	26	8	50	65s	2024	7	26	12	4	164	1		Seed plant	MUS_383		Angraecum sp.	orchidaceae	Valid	3.1	260						false	3	unripe fruit	2	0	3				1	main trunk	Adult	958		vegetating	65s-164/8	12	33	e65627a6-77bd-4bb8-bd54-198de028a5f8
2024726124164	2024726124164	2024	7	26	8	50	65s	2024	7	26	12	4	164	1		Seed plant	MUS_383		Angraecum sp.	orchidaceae	Valid	3.13	260						false	3	vegetating	3	0	0				1	main trunk	Juvenile/Sapling	958		vegetating	65s-164/8b	12	33	e65627a6-77bd-4bb8-bd54-198de028a5f81
2024726124164	2024726124164	2024	7	26	8	50	65s	2024	7	26	12	4	164	1		Seed plant	MUS_383		Angraecum sp.	orchidaceae	Valid	3.13	260						false	3	vegetating	2	0	0				1	main trunk	Juvenile/Sapling	958		vegetating	65s-164/8c	12	33	e65627a6-77bd-4bb8-bd54-198de028a5f82
2024726124164	2024726124164	2024	7	26	8	50	65s	2024	7	26	12	4	164	1		Seed plant	MUS_397		Angraecum pectinatum	orchidaceae	Valid	3.3	310						false	0	vegetating	7						1	main trunk	Adult	959		vegetating	65s-164/9	12	36	20c132fd-d84a-40a4-8ea7-4c72384407a6
2024726124164	2024726124164	2024	7	26	8	50	65s	2024	7	26	12	4	164	1		Seed plant	MUS_397		Angraecum pectinatum	orchidaceae	Valid	3.3	310						false	1	flower bud	16	0	0				1	main trunk	Adult	960		vegetating	65s-164/10	12	38	afb576bc-5523-4608-b7da-c796b31206fc
2024726124164	2024726124164	2024	7	26	8	50	65s	2024	7	26	12	4	164	1		Seed plant	MUS_397		Angraecum pectinatum	orchidaceae	Valid	3.8	224						false	0	vegetating	15	0	0				1	main trunk	Adult	961		vegetating	65s-164/11	12	40	2d56fa64-7c58-4993-9c5f-76f59af26ffd
2024726124164	2024726124164	2024	7	26	8	50	65s	2024	7	26	12	4	164	2		Fern	zz	unknown	Microsorum scolopendria	Polypodiaceae	Valid	3.7	210						false	0	vegetating	3	0	0				1	main trunk	Adult	962-964		vegetating	65s-164/12	12	43	010d84d4-14c3-4fea-b4d4-9e4f9d4fb740
2024726124164	2024726124164	2024	7	26	8	50	65s	2024	7	26	12	4	164	1		Seed plant	MUS_397		Angraecum pectinatum	orchidaceae	Valid	3.9	320						false	0	vegetating							1	main trunk	Adult	965		vegetating	65s-164/13	12	45	5ee2cd80-2fe5-4ac1-8eff-f99869262593
2024726124164	2024726124164	2024	7	26	8	50	65s	2024	7	26	12	4	164	1		Seed plant	MUS_397		Angraecum pectinatum	orchidaceae	Valid	3.9	240						false	0	vegetating							1	main trunk	Adult	965		vegetating	65s-164/14	12	47	e4928731-b057-44b7-8ffc-6eaa119e2f36
2024726124164	2024726124164	2024	7	26	8	50	65s	2024	7	26	12	4	164	1		Seed plant	MUS_460		Polystachia mauritiana s.l.	orchidaceae	Valid	4.9	314						false	0	vegetating	3						1	main trunk	Adult	966		vegetating	65s-164/15	12	49	21db93f5-364a-40c9-8128-7c712b282cab
2024726124164	2024726124164	2024	7	26	8	50	65s	2024	7	26	12	4	164	1		Seed plant	MUS_392		Angraecum sp.	orchidaceae	Valid	5	314						false	0	vegetating	5						1	main trunk	Juvenile/Sapling	968			65s-164/	12	52	6646b768-2400-43ba-94e6-12cd3d17d83d
2024726124164	2024726124164	2024	7	26	8	50	65s	2024	7	26	12	4	164	1		Seed plant	MUS_397		Angraecum pectinatum	orchidaceae	Valid	5.16	314						false	0	vegetating	4						1	main trunk	Juvenile/Sapling	969		vegetating	65s-164/17	12	53	7d8e1bae-5f36-4aab-ae08-d2437af67469
2024726124164	2024726124164	2024	7	26	8	50	65s	2024	7	26	12	4	164	1		Seed plant	MUS_397		Angraecum pectinatum	orchidaceae	Valid	6.5	320						false	0	vegetating	13						1	main trunk	Adult	970		vegetating	65s-164/18	12	56	9a1c184c-8eac-493c-bc74-eb333eba87e0
2024726124164	2024726124164	2024	7	26	8	50	65s	2024	7	26	12	4	164	1		Seed plant	MUS_397		Angraecum pectinatum	orchidaceae	Valid	6.5	320						false	0	vegetating							1	main trunk	Adult	970		vegetating	65s-164/18b	12	56	9a1c184c-8eac-493c-bc74-eb333eba87e01
2024726124164	2024726124164	2024	7	26	8	50	65s	2024	7	26	12	4	164	1		Seed plant	MUS_397		Angraecum pectinatum	orchidaceae	Valid	5.7	300						false	0	vegetating	7						1	main trunk	Juvenile/Sapling	971		vegetating	65s-164/19	12	58	c7459aff-4db3-443e-85f4-595314e28d20
2024726124164	2024726124164	2024	7	26	8	50	65s	2024	7	26	12	4	164	1		Seed plant	MUS_397		Angraecum pectinatum	orchidaceae	Valid	5.7	300						false	0	vegetating							1	main trunk	Adult	972		vegetating	65s-164/20	13	1	5d79d3c6-73c5-418b-a6e1-8329b189a954
2024726124164	2024726124164	2024	7	26	8	50	65s	2024	7	26	12	4	164	1		Seed plant	MUS_400		Angraecum pectinatum	orchidaceae	Valid	7	350						false	0	vegetating	4						1	main trunk	Juvenile/Sapling	973		vegetating	65s-164/21	13	2	32f5b951-2b09-4103-9da9-3d92a7edb88b1
2024726124164	2024726124164	2024	7	26	8	50	65s	2024	7	26	12	4	164	1		Seed plant	MUS_400		Angraecum pectinatum	orchidaceae	Valid	7	350						false	0	vegetating	7						1	main trunk	Juvenile/Sapling	973		vegetating	65s-164/21b	13	2	32f5b951-2b09-4103-9da9-3d92a7edb88b2
2024726124164	2024726124164	2024	7	26	8	50	65s	2024	7	26	12	4	164	1		Seed plant	MUS_400		Angraecum pectinatum	orchidaceae	Valid	7	350						false	0	vegetating							1	main trunk	Juvenile/Sapling	973		vegetating	65s-164/21c	13	2	32f5b951-2b09-4103-9da9-3d92a7edb88b3
2024726124164	2024726124164	2024	7	26	8	50	65s	2024	7	26	12	4	164	1		Seed plant	MUS_397		Angraecum pectinatum	orchidaceae	Valid	7.5	350						false	0	vegetating	3						1	main trunk	Juvenile/Sapling	975		vegetating	65s-164/22	13	5	00be629d-141b-400c-8cfa-b2bf1484970b
2024726124164	2024726124164	2024	7	26	8	50	65s	2024	7	26	12	4	164	1		Seed plant	MUS_397		Angraecum pectinatum	orchidaceae	Valid	7.5	350						false	0	vegetating	5						1	main trunk	Juvenile/Sapling	975		vegetating	65s-164/22b	13	5	00be629d-141b-400c-8cfa-b2bf1484970b1
2024726124164	2024726124164	2024	7	26	8	50	65s	2024	7	26	12	4	164	1		Seed plant	MUS_397		Angraecum pectinatum	orchidaceae	Valid	7.5	350						false	0	vegetating	6						1	main trunk	Juvenile/Sapling	975		vegetating	65s-164/22c	13	5	00be629d-141b-400c-8cfa-b2bf1484970b2
2024726124164	2024726124164	2024	7	26	8	50	65s	2024	7	26	12	4	164	1		Seed plant	MUS_397		Angraecum pectinatum	orchidaceae	Valid	7.6	350						false	0	vegetating	3						1	main trunk	Juvenile/Sapling	975		vegetating	65s-164/22d	13	5	00be629d-141b-400c-8cfa-b2bf1484970b3
2024726124164	2024726124164	2024	7	26	8	50	65s	2024	7	26	12	4	164	1		Seed plant	MUS_397		Angraecum pectinatum	orchidaceae	Valid	7.8	350						false	0	vegetating	5						1	main trunk	Juvenile/Sapling	975		vegetating	65s-164/22e	13	5	00be629d-141b-400c-8cfa-b2bf1484970b4
2024726124164	2024726124164	2024	7	26	8	50	65s	2024	7	26	12	4	164	1		Seed plant	MUS_397		Angraecum pectinatum	orchidaceae	Valid	7.8	350						false	0	vegetating	6						1	main trunk	Juvenile/Sapling	975		vegetating	65s-164/22f	13	5	00be629d-141b-400c-8cfa-b2bf1484970b5
2024726124164	2024726124164	2024	7	26	8	50	65s	2024	7	26	12	4	164	1		Seed plant	MUS_397		Angraecum pectinatum	orchidaceae	Valid	7.5	350						false	0	vegetating							1	main trunk	Juvenile/Sapling	975		vegetating	65s-164/22g	13	5	00be629d-141b-400c-8cfa-b2bf1484970b6
2024726124164	2024726124164	2024	7	26	8	50	65s	2024	7	26	12	4	164	1		Seed plant	MUS_397		Angraecum pectinatum	orchidaceae	Valid	7.5	350						false	0	vegetating							1	main trunk	Juvenile/Sapling	975		vegetating	65s-164/22h	13	5	00be629d-141b-400c-8cfa-b2bf1484970b7
2024726124164	2024726124164	2024	7	26	8	50	65s	2024	7	26	12	4	164	1		Seed plant	MUS_397		Angraecum pectinatum	orchidaceae	Valid	9	270						false	0	vegetating	6						2	crown	Juvenile/Sapling	976		vegetating	65s-164/22	13	7	0716881a-1e3d-4ace-a96f-b7a343f92cff
2024726124164	2024726124164	2024	7	26	8	50	65s	2024	7	26	12	4	164	1		Seed plant	MUS_397		Angraecum pectinatum	orchidaceae	Valid	9	270						false	0	vegetating							2	crown	Juvenile/Sapling	976		vegetating	65s-164/22b	13	7	0716881a-1e3d-4ace-a96f-b7a343f92cff1
2024726124164	2024726124164	2024	7	26	8	50	65s	2024	7	26	12	4	164	1		Seed plant	MUS_397		Angraecum pectinatum	orchidaceae	Valid	9							false	0	vegetating							2	crown	Adult	977		vegetating	65s-164/24	13	10	c2c33caa-1d8d-49ef-ab13-78ec8258a9cc
2024726124164	2024726124164	2024	7	26	8	50	65s	2024	7	26	12	4	164	1		Seed plant	MUS_397		Angraecum pectinatum	orchidaceae	Valid	9.5	270						false	0	vegetating							1	main trunk	Adult	978		vegetating	65s-164/25	13	11	a91e305e-d2d4-4970-b9c3-02a664ba1aec
2024726124164	2024726124164	2024	7	26	8	50	65s	2024	7	26	12	4	164	1		Seed plant	MUS_397		Angraecum sp.	orchidaceae	Valid	10	220						false	0	vegetating	2						1	main trunk	Juvenile/Sapling	979		vegetating	65s-164/26	13	13	4df8d0a9-d0ee-413a-8fdb-b54a58ce3bd7
2024726124164	2024726124164	2024	7	26	8	50	65s	2024	7	26	12	4	164	1		Seed plant	MUS_397		Angraecum pectinatum	orchidaceae	Valid	10.5	310						false	0	vegetating							1	main trunk	Adult	980		vegetating	65s-164/27	13	19	a8b5a30f-d647-4112-8e1c-06c4d83fff45
2024726124164	2024726124164	2024	7	26	8	50	65s	2024	7	26	12	4	164	1		Seed plant	MUS_419		Bulbophyllum sp.	orchidaceae	Valid	10.5	300						false	0	vegetating	3	0	0				1	main trunk	Adult	980		vegetating	65s-164/28	13	22	d42efada-24da-48fb-97bc-8e99ec66a58d
2024726124164	2024726124164	2024	7	26	8	50	65s	2024	7	26	12	4	164	1		Seed plant	MUS_419		Bulbophyllum sp.	orchidaceae	Valid	10.5	200						false	0	vegetating	4						1	main trunk	Juvenile/Sapling	982		vegetating	65s-164/29	13	23	40c07b32-1995-456c-b5ee-1544ebca9409
2024726124164	2024726124164	2024	7	26	8	50	65s	2024	7	26	12	4	164	1		Seed plant	MUS_419		Bulbophyllum sp.	orchidaceae	Valid	10.7	270						false	0	vegetating	3						1	main trunk	Adult	983		vegetating	65s-164/30	13	25	7f58aac4-524f-4c1f-b885-fdf6d52a1a03
202452785499	202452785499	2024	5	26	20	46	65s	2024	5	27	8	54	99	1		Seed plant	MUS_508		Piper borbonense	Piperaceae	Valid	0.14	46						false	0	vegetating	5	0	0			0.1	1	main trunk	Juvenile/Sapling	103-0031	Max length along trunk: 0.28	vegetating	65s-99/2	9	21	c358a006-c3bc-479f-beb2-51d3fb60be81
202452785499	202452785499	2024	5	26	20	46	65s	2024	5	27	8	54	99	1		Seed plant	MUS_508		Piper borbonense	Piperaceae	Valid		0-360						false	0	vegetating						1.1	1	main trunk	Adult	103-0032-33	Reaches to crown	vegetating	65s-99/3	9	25	81c24a24-c1cd-4916-980c-cd2b615fb393
202452785499	202452785499	2024	5	26	20	46	65s	2024	5	27	8	54	99	1		Seed plant	MUS_508		Piper borbonense	Piperaceae	Valid	1.2	294						false	0	vegetating	23	0	0			0.2	1	main trunk	Subadult	103-0034		vegetating	65s-99/4	9	30	42836a00-ad7b-4015-9851-1c533f5481bd
202452785499	202452785499	2024	5	26	20	46	65s	2024	5	27	8	54	99	1		Seed plant	MUS_508		Piper borbonense	Piperaceae	Valid		114						false	0	vegetating						0.2	1	main trunk	Subadult	103-0035		vegetating	65s-99/5	9	33	6941e4c9-e205-4107-8141-bfbf0e732862
202452785499	202452785499	2024	5	26	20	46	65s	2024	5	27	8	54	99	1		Seed plant	MUS_397		Angraecum pectinatum	orchidaceae	Valid	2.9	180						false	0	vegetating	7	0	0				1	main trunk	Subadult	103-38-39		vegetating	65s-99/6	9	39	cac51f14-55a5-4292-96e2-8746d96d44e0
202452785499	202452785499	2024	5	26	20	46	65s	2024	5	27	8	54	99	1		Seed plant	MUS_397		Angraecum pectinatum	orchidaceae	Valid	2.95	146						false	0	vegetating	4						1	main trunk	Juvenile/Sapling	103-0037		vegetating	65s-99/7	9	44	51f15986-88c4-4a82-b73d-b0df0aff4b9b
202452785499	202452785499	2024	5	26	20	46	65s	2024	5	27	8	54	99	1		Seed plant	MUS_397		Angraecum pectinatum	orchidaceae	Valid	3.4	220								flower bud	16	0	0				1	main trunk	Adult	103-0040-41		vegetating	65s-99/8	9	45	a5ea603c-4c22-42e7-80e3-b5e5f72b0b56
202452785499	202452785499	2024	5	26	20	46	65s	2024	5	27	8	54	99	1		Seed plant	MUS_397		Angraecum pectinatum	orchidaceae	Valid	3.3	178						false	0	vegetating	5	0	0				1	main trunk	Subadult	103-0043-44		vegetating	65s-99/9	9	51	1c581bda-2b7c-4d52-ba75-ce8f09bb35c9
202452785499	202452785499	2024	5	26	20	46	65s	2024	5	27	8	54	99	1		Seed plant	MUS_397		Angraecum pectinatum	orchidaceae	Valid	3.4	176						false	0	vegetating	6	0	0				1	main trunk	Subadult	103-0045-46		vegetating	65s-99/10	9	55	27f803a1-984b-4761-a42c-74a7546de6a3
202452785499	202452785499	2024	5	26	20	46	65s	2024	5	27	8	54	99	1		Seed plant	MUS_397		Angraecum pectinatum	orchidaceae	Valid	3.9	140						false	0	vegetating	6	0	0				1	main trunk	Subadult	103-0047		vegetating	65s-99/11	9	59	003572e9-6a84-40b8-adfa-e2c8f80600da
202452785499	202452785499	2024	5	26	20	46	65s	2024	5	27	8	54	99	1		Seed plant	MUS_397		Angraecum pectinatum	orchidaceae	Valid	3.75	292						false	0	ripe fruit	58	0	1				1	main trunk	Adult	103-0048-49		fruiting	65s-99/12	10	4	41f594e8-1f0b-44cd-801d-9e61c7f1f504
202452785499	202452785499	2024	5	26	20	46	65s	2024	5	27	8	54	99	1		Seed plant	MUS_397		Angraecum pectinatum	orchidaceae	Valid	4.05	252						false	5	dry/fallen fruit	65	0	0				1	main trunk	Adult	103-0050		vegetating	65s-99/13	10	10	7ec59be0-211e-44a2-81b2-e0a5581f1128
202452785499	202452785499	2024	5	26	20	46	65s	2024	5	27	8	54	99	1		Seed plant	MUS_397		Angraecum pectinatum	orchidaceae	Valid	4.16	200						false	0	vegetating	10	0	0				1	main trunk	Subadult	103-0051		vegetating	65s-99/14	10	14	b1cdedf9-009e-40c9-a41a-2459727a3da9
202452785499	202452785499	2024	5	26	20	46	65s	2024	5	27	8	54	99	1		Seed plant	MUS_383		Angraecum sp.	orchidaceae	Valid	4.36	220						false	3	unripe fruit	6	0	1				1	main trunk	Adult	103-0052-53		fruiting	65s-99/15	10	23	336e644f-9c6d-48d7-93eb-d900cad90e01
202452785499	202452785499	2024	5	26	20	46	65s	2024	5	27	8	54	99	1		Seed plant	MUS_397		Angraecum pectinatum	orchidaceae	Valid	4.76	256						false	0	vegetating	7	0	0				1	main trunk	Subadult	103-0054		vegetating	65s-99/16	10	28	ffce941d-c130-4a7a-b0e3-3edc1ee01d79
202452785499	202452785499	2024	5	26	20	46	65s	2024	5	27	8	54	99	1		Seed plant	MUS_397		Angraecum pectinatum	orchidaceae	Valid	5.2	130						false	0	vegetating	5	0	0				1	main trunk	Juvenile/Sapling	103-0055		vegetating	65s-99/17	10	32	5b4dfaae-8c1c-46f3-9572-1391187e01b5
202452785499	202452785499	2024	5	26	20	46	65s	2024	5	27	8	54	99	1		Seed plant	MUS_397		Angraecum pectinatum	orchidaceae	Valid	5.2	130						false	0	vegetating	2	0	0				1	main trunk	Juvenile/Sapling	103-0055		vegetating	65s-99/18	10	38	1f5af4e3-4081-41a6-9979-acb188b8c012
202452785499	202452785499	2024	5	26	20	46	65s	2024	5	27	8	54	99	1		Seed plant	MUS_397		Angraecum pectinatum	orchidaceae	Valid	5.5	152						false	0	flower bud	33	0	0				1	main trunk	Adult	103-0057-58		vegetating	65s-99/20	10	45	efb3e542-5731-4101-b4cd-154f63758a8f
202452785499	202452785499	2024	5	26	20	46	65s	2024	5	27	8	54	99	1		Seed plant	MUS_397		Angraecum pectinatum	orchidaceae	Valid	5.9	160						false	0	vegetating	6	0	0				1	main trunk	Juvenile/Sapling	103-0058		vegetating	65s-99/21	10	48	d00c8b87-ad40-4f48-8faa-42324c673132
202452785499	202452785499	2024	5	26	20	46	65s	2024	5	27	8	54	99	1		Seed plant	MUS_397		Angraecum pectinatum	orchidaceae	Valid	5.95	150						false	0	vegetating	8	0	0				1	main trunk	Juvenile/Sapling	103-0058		vegetating	65s-99/22	10	58	36769ef8-1faf-40cc-a8a1-53f87ff3b0be
202452785499	202452785499	2024	5	26	20	46	65s	2024	5	27	8	54	99	1		Seed plant	MUS_397		Angraecum pectinatum	orchidaceae	Valid	5.9	140						false	0	vegetating	8	0	0				1	main trunk	Subadult	103-0058		vegetating	65s-99/23	10	59	2e88c500-fb35-4dac-858e-2b683fadb295
202452785499	202452785499	2024	5	26	20	46	65s	2024	5	27	8	54	99	1		Seed plant	MUS_397		Angraecum pectinatum	orchidaceae	Valid	5.9	140						false	0	vegetating	7	0	0				1	main trunk	Subadult	103-0058		vegetating	65s-99/24	11	0	9e62065f-372b-49d6-97ac-c6d2ce45fdea
202452785499	202452785499	2024	5	26	20	46	65s	2024	5	27	8	54	99	1		Seed plant	MUS_397		Angraecum pectinatum	orchidaceae	Valid	5.9	100						false	0	vegetating	6	0	0				1	main trunk	Subadult	103-0058		vegetating	65s-99/25	11	1	01f9e2a7-2c78-4d3d-b4a4-92c91b70765c
202452785499	202452785499	2024	5	26	20	46	65s	2024	5	27	8	54	99	2		Fern	FERN_169		Lepisorus spicata	Polypodiaceae	Valid	6.5	30						false	0	vegetating	2						1	main trunk	Subadult	103-0059		vegetating	65s-99/26	11	2	bdc5b930-27bd-4d53-a6f0-7fcc3ba5cd1d
202452785499	202452785499	2024	5	26	20	46	65s	2024	5	27	8	54	99	2		Fern	FERN_173		Microsorum punctatum	Polypodiaceae	Valid	7.5	184						false	0	vegetating	3						1	main trunk	Subadult	103-0061-62		vegetating	65s-99/27	11	4	98ce2a0c-c528-47d5-92d4-a110d7e6c367
202452785499	202452785499	2024	5	26	20	46	65s	2024	5	27	8	54	99	2		Fern	FERN_173		Microsorum punctatum	Polypodiaceae	Valid	8.5	162						false	0	vegetating	3	3					1	main trunk	Subadult	103-0063		vegetating	65s-99/28	11	10	e6d6e55d-8632-459d-a026-f182aaed7b5c
202452785499	202452785499	2024	5	26	20	46	65s	2024	5	27	8	54	99	2		Fern	FERN_86		Hymenophyllaceae	Hymenophyllaceae	Valid																		main trunk			Present: at base of trunk - from 180 to 90 degrees		65s-99/29	11	12	08bd560f-fe2d-4020-bd80-0f5b31bb4ce8
20245271157100	20245271157100	2024	5	26	20	46	65s	2024	5	27	11	57	100	1		Seed plant	MUS_508		Piper borbonense	Piperaceae	Valid	0.4	156						false	0	vegetating	29	0	0			0.1	1	main trunk	Subadult	103-0064	0.65 cm - max length	vegetating	65s-100/1	12	3	bdabe4c5-82c0-4594-a10d-25eec7532d0f
20245271157100	20245271157100	2024	5	26	20	46	65s	2024	5	27	11	57	100	1		Seed plant	MUS_508		Piper borbonense	Piperaceae	Valid	0.2	146						false	0	vegetating	13					0.1	1	main trunk	Subadult	103-0065	0.36 cm - max length	vegetating	65s-100/2	12	15	30d4e3f4-874f-476b-85c3-b7cf1d55456a
20245271157100	20245271157100	2024	5	26	20	46	65s	2024	5	27	11	57	100	1		Seed plant	MUS_508		Piper borbonense	Piperaceae	Valid		220-180						false	0	vegetating						0.35	1	main trunk	Adult	103-0066		vegetating	65s-100/3	12	18	6763648b-094a-4a66-b3fd-d42a1bd0742c
20245271157100	20245271157100	2024	5	26	20	46	65s	2024	5	27	11	57	100	1		Seed plant	MUS_508		Piper borbonense	Piperaceae	Valid		240						false	0	vegetating						0.35	1	main trunk	Adult	103-0066		vegetating	65s-100/4	12	21	396d2620-2bf2-4180-b9f2-a8c6aac9f06d
20245271157100	20245271157100	2024	5	26	20	46	65s	2024	5	27	11	57	100	1		Seed plant	MUS_508		Piper borbonense	Piperaceae	Valid		From 190 - 360						false	0	vegetating						0.3	1	main trunk	Adult	103-0065		vegetating	65s-100/5	12	24	0384093c-1303-4562-b7b6-4ebf174603ee
20245271157100	20245271157100	2024	5	26	20	46	65s	2024	5	27	11	57	100	1		Seed plant	MUS_508		Piper borbonense	Piperaceae	Valid		212						false	0	vegetating						0.2	1	main trunk	Juvenile/Sapling	103-0065		vegetating	65s-100/6	12	27	dac3080d-c6ee-422c-881a-b148bd7651d8
20245271157100	20245271157100	2024	5	26	20	46	65s	2024	5	27	11	57	100	2		Fern	FERN_175		Microsorum scolopendria	Polypodiaceae	Valid	0.8	214				10	1.8	true	0	vegetating	4	0			0	0.3	1	main trunk	Subadult	103-00		vegetating	65s-100/7	12	30	48ab05d6-15ce-466b-a741-d9230d85975e
20245271157100	20245271157100	2024	5	26	20	46	65s	2024	5	27	11	57	100	1		Seed plant	MUS_397		Angraecum pectinatum	orchidaceae	Valid	7.9	234						false	0	vegetating	8						2	crown	Subadult	103-0072		vegetating	65s-100/8	12	41	82ffb35b-5bf6-4dce-8fa3-f8faa2b8b72a
20245271157100	20245271157100	2024	5	26	20	46	65s	2024	5	27	11	57	100	1		Seed plant	MUS_397		Angraecum pectinatum	orchidaceae	Valid	7.9	243						false	0	vegetating	7						2	crown	Subadult	102-0072		vegetating	65s-100/9	12	49	cc1d2693-9b86-4c5b-864a-9fe4775523fd
20245271157100	20245271157100	2024	5	26	20	46	65s	2024	5	27	11	57	100	1		Seed plant	MUS_397		Angraecum pectinatum	orchidaceae	Valid	7.9	243						false	0	vegetating		0	0				2	crown	Subadult	103-0072		flowering	65s-100/10	12	50	f5b4d796-d078-4319-b592-917c8182b70a
20245271157100	20245271157100	2024	5	26	20	46	65s	2024	5	27	11	57	100	1		Seed plant	MUS_397		Angraecum pectinatum	orchidaceae	Valid	7.9	243						false	0	vegetating		0	0				2	crown	Adult	103-0071	Clump of at least 3 indiv	vegetating	65s-100/11	12	51	fb761cab-f9bf-4c9d-abcb-8ad7b6a91270
20245271157100	20245271157100	2024	5	26	20	46	65s	2024	5	27	11	57	100	1		Seed plant	MUS_397		Angraecum pectinatum	orchidaceae	Valid	8.6	150						false	0	vegetating	7	0	0				2	crown	Juvenile/Sapling	103-0073		vegetating	65s-100/12	12	55	ebb924cd-0623-44e0-8d97-cd50b877cecb
20245271157100	20245271157100	2024	5	26	20	46	65s	2024	5	27	11	57	100	1		Seed plant	MUS_397		Angraecum pectinatum	orchidaceae	Valid	8.69	167						false	0	vegetating	5	0	0				2	crown	Subadult	103-0074		vegetating	65s-100/13	12	57	cd778818-e103-430d-a0e0-2884eeaf3ed2
20245271157100	20245271157100	2024	5	26	20	46	65s	2024	5	27	11	57	100	1		Seed plant	MUS_397		Angraecum pectinatum	orchidaceae	Valid	9.3	72						false	0	vegetating	17	0	0				2	crown	Adult	103-0075		vegetating	65s-100/14	12	59	ddf7be9b-0a6d-475c-a2cd-c18ac2a35c2a
20245271157100	20245271157100	2024	5	26	20	46	65s	2024	5	27	11	57	100	1		Seed plant	MUS_508		Piper borbonense	Piperaceae	Valid		335				0.29	0.34	true	0	vegetating	32						1	main trunk		Iphone img_7884		vegetating	65s-100/15	10	11	17d556cb-cc73-4dab-99c4-861f71a7be53
20245271157100	20245271157100	2024	5	26	20	46	65s	2024	5	27	11	57	100	2		Fern	zz	Asplenium sp.	Microsorum punctatum	Polypodiaceae	Valid	4.1	340						true	0	vegetating	41						1	main trunk		Iphone img_7885			65s-100/16	10	13	71cd7a55-ed89-4de8-948e-5789c451ba07
20245271157100	20245271157100	2024	5	26	20	46	65s	2024	5	27	11	57	100	1		Seed plant	MUS_397		Angraecum pectinatum	orchidaceae	Valid	7.51	277							0	vegetating	32	0	0				1	main trunk	Adult	103-0068			65s-100/17	10	16	ba6a598d-c797-4cbd-90c5-510c0f5227f6
20245271157100	20245271157100	2024	5	26	20	46	65s	2024	5	27	11	57	100	1		Seed plant	MUS_460		Angraecum sp.	orchidaceae	Valid	8	75							2	dry/fallen fruit	13	5					2	crown	Adult	103-0069-70	2 small pectinatum below		65s-100/18	10	18	c0302ff5-558c-427e-a33b-eaa810848b49
20245271316101	20245271316101	2024	5	26	20	46	65s	2024	5	27	13	16	101	1		Seed plant	MUS_508		Piper borbonense	Piperaceae	Valid	0.36	104						false	0	vegetating	14	0	0			0.1	1	main trunk	Subadult	103-0077		vegetating	65s-101/1	13	23	71e3f022-6838-4fdb-93a7-9dcf77072521
20245271316101	20245271316101	2024	5	26	20	46	65s	2024	5	27	13	16	101	1		Seed plant	MUS_106		Cnestis polyphylla	Connaraceae	Valid		All around the trunk						false	0	vegetating		0	0	0		2.8	1	main trunk	Adult	103-0082-83		vegetating	65s-101/2	13	26	2c55fa2b-a790-46b1-8c42-2d95a5f985c9
20245271316101	20245271316101	2024	5	26	20	46	65s	2024	5	27	13	16	101	2		Fern	FERN_121		Lepisorus spicata	Polypodiaceae	Valid	2.11	180						false	0	vegetating	2	0	0	2.2	0	0.4		main trunk		103-0084-85	Frond width: 0.4	vegetating	65s-101/3	13	30	3aff5cf6-5fc7-4e60-9a39-4a15ec42f936
20245271316101	20245271316101	2024	5	26	20	46	65s	2024	5	27	13	16	101	2		Fern	FERN_121		Lepisorus spicata	Polypodiaceae	Valid	2.11	180						false	0	vegetating	2			4.5	0	0.4	1	main trunk	Juvenile/Sapling	103-0084-85	Max frond width: 0.4	vegetating	65s-101/4	13	33	58a2ccc9-da9c-418e-ad9e-2f84e0877774
20245271316101	20245271316101	2024	5	26	20	46	65s	2024	5	27	13	16	101	2		Fern	FERN_169		Lepisorus spicata	Polypodiaceae	Valid	5.6	296						false			10				1		1	main trunk	Adult			reproducing	65s-101/5	13	37	68c94bab-d98e-4013-b1ac-f8ecdf9d9ec2
20245271316101	20245271316101	2024	5	26	20	46	65s	2024	5	27	13	16	101	1		Seed plant	MUS_397		Angraecum pectinatum	orchidaceae	Valid	8.33	138						false	0	vegetating	3	0	0				1	main trunk	Juvenile/Sapling			vegetating	65s-101/6	13	43	3132c650-d8a0-4b9d-9e26-d4ce27d4a7f7
20245271316101	20245271316101	2024	5	26	20	46	65s	2024	5	27	13	16	101	1		Seed plant	MUS_397		Angraecum pectinatum	orchidaceae	Valid	8.33	138							0	vegetating	7	0	0				1	main trunk	Subadult			vegetating	65s-101/7	13	45	dd22df2d-1a22-4419-8567-121b5cad2445
20245271316101	20245271316101	2024	5	26	20	46	65s	2024	5	27	13	16	101	1		Seed plant	MUS_383		Angraecum sp.	orchidaceae	Valid	7.57	258						false	0	vegetating	3	0	0				1	main trunk	Adult			vegetating	65s-101/8	13	48	97e69716-55c9-456e-befb-42b9b8aeeef4
20245271316101	20245271316101	2024	5	26	20	46	65s	2024	5	27	13	16	101	1		Seed plant	MUS_383		Angraecum sp.	orchidaceae	Valid	7.67	258						false	0	vegetating	4	0	0				1	main trunk	Subadult			vegetating	65s-101/9	13	50	3afbb317-7546-4a75-8ab0-332b1a3c0524
20245271316101	20245271316101	2024	5	26	20	46	65s	2024	5	27	13	16	101	2		Fern	zz	Asplenium sp	Lepisorus spicata	Polypodiaceae	Valid	1.86	314	1.86	0.19	1.7	1.93	0.37				2						1	main trunk	Subadult	Iphone img_7940	Looks dying		65s-101/10	10	20	cb2cb20d-7139-49d8-a00e-524b19c19857
20245271316101	20245271316101	2024	5	26	20	46	65s	2024	5	27	13	16	101	1		Seed plant	MUS_508		Piper borbonense	Piperaceae	Valid	5.85	202				0.41	0.48				52						1	main trunk	Adult	Iphone img_7941			65s-101/11	10	22	8023b620-a118-4596-bb54-38e14e16ebe7
20245271316101	20245271316101	2024	5	26	20	46	65s	2024	5	27	13	16	101	2		Fern	zz	microsorum sp.	Microsorum punctatum	Polypodiaceae	Valid	5.57	75							0	vegetating	5						1	main trunk	Subadult	Iphone img_7942			65s-101/12	10	23	bbbbadb6-8739-4bcf-995d-430fb223201f
20245271411102	20245271411102	2024	5	26	20	46	65s	2024	5	27	14	11	102	1		Seed plant	MUS_508		Piper borbonense	Piperaceae	Valid	74	350				3.2	1.7	false	0	vegetating	16	0	0			0.1	1	main trunk	Subadult	103-198		vegetating	65s-102/1	9	40	01962009-c872-463b-bd1c-2bfe997e7fae
20245271411102	20245271411102	2024	5	26	20	46	65s	2024	5	27	14	11	102	1		Seed plant	MUS_508		Piper borbonense	Piperaceae	Valid	23	164				2.4	1.2	false	0	vegetating	9	0	0			0.1	1	main trunk	Subadult	199		vegetating	65s-102/2	9	45	11e7abba-88a2-4436-af84-0b1e08bc982b
20245271411102	20245271411102	2024	5	26	20	46	65s	2024	5	27	14	11	102	1		Seed plant	MUS_508		Piper borbonense	Piperaceae	Valid		164				6	2.9	false	0	vegetating						0.2	1	main trunk	Adult	200		vegetating	65s-102/3	9	49	81ad197f-d4af-416f-a96d-24e476d18ecb
20245271411102	20245271411102	2024	5	26	20	46	65s	2024	5	27	14	11	102	1		Seed plant	MUS_508		Piper borbonense	Piperaceae	Valid		164				6.4	3.2	false	0	vegetating						0.2	1	main trunk	Adult			vegetating	65s-102/4	9	51	fac7c5ca-5d1e-4e5e-9c50-a9458c3aa82b
20245271411102	20245271411102	2024	5	26	20	46	65s	2024	5	27	14	11	102	1		Seed plant	MUS_508		Piper borbonense	Piperaceae	Valid		164				7.2	4.3	false	0	vegetating						0.4	1	main trunk	Adult			vegetating	65s-102/5	9	52	79472bcb-ce55-4284-9a00-cb8c14e91f2f
20245271411102	20245271411102	2024	5	26	20	46	65s	2024	5	27	14	11	102	1		Seed plant	MUS_508		Piper borbonense	Piperaceae	Valid		164						false								0.4	1	main trunk					65s-102/6	9	53	3aa108a1-feea-4394-b770-dd53e425debe
20245271411102	20245271411102	2024	5	26	20	46	65s	2024	5	27	14	11	102	1		Seed plant	MUS_687		Piper borbonense	Piperaceae	Valid		164						false								0.7	1	main trunk		277-280			65s-102/7	9	56	1322d8f3-e7a9-47fb-a2ba-dacbdf1fb620
20245271411102	20245271411102	2024	5	26	20	46	65s	2024	5	27	14	11	102	1		Seed plant	MUS_687		Piper borbonense	Piperaceae	Valid		170														0.85	1	main trunk			Flatened trunk		65s-102/8	10	0	d91b771c-7200-4ef0-bce0-2d48ff456f3f
20245271411102	20245271411102	2024	5	26	20	46	65s	2024	5	27	14	11	102	2		Fern	FERN_119		Nephrolepis biserrata	Nephrolepidaceae	Valid	0.32	240	9	3	9.2		2.7	false	0	vegetating	1			11.3		0.3	1	main trunk	Juvenile/Sapling	201-203		vegetating	65s-102/9	10	2	efd53d3e-11bd-492f-8e92-c46c81aeaf64
20245271411102	20245271411102	2024	5	26	20	46	65s	2024	5	27	14	11	102	2		Fern	FERN_119		Nephrolepis biserrata	Nephrolepidaceae	Valid	63	230	43	38	26	28	6.4	false	0	vegetating	3					0.8	1	main trunk	Adult	204-205		vegetating	65s-102/10	10	8	7e47c197-0131-47b4-b566-f51c5e648335
20245271411102	20245271411102	2024	5	26	20	46	65s	2024	5	27	14	11	102	2		Fern	FERN_119		Nephrolepis biserrata	Nephrolepidaceae	Valid	78	230	42	48.5	38	53	13	false	0	vegetating	4				0	0.8	1	main trunk	Adult	206		vegetating	65s-102/11	10	11	1d8db88c-026f-47d5-be6f-856bda2c1ff1
20245271411102	20245271411102	2024	5	26	20	46	65s	2024	5	27	14	11	102	2		Fern	FERN_119		Nephrolepis biserrata	Nephrolepidaceae	Valid	82	250	52	30	37	46	9	false	0	vegetating	2				0	0.7	1	main trunk	Adult	207-208		vegetating	65s-102/12	10	15	dff28315-4920-4fb1-bf0f-bbd1d150532d
20245271411102	20245271411102	2024	5	26	20	46	65s	2024	5	27	14	11	102	2		Fern	FERN_119		Nephrolepis biserrata	Nephrolepidaceae	Valid	75	224	3	8	3	10	2.8	false	0	vegetating	2				0	0.1	1	main trunk	Subadult	209-212		vegetating	65s-102/13	10	18	28c5e467-5d34-4615-b15f-57381b120fb5
20245271411102	20245271411102	2024	5	26	20	46	65s	2024	5	27	14	11	102	2		Fern	FERN_119		Nephrolepis biserrata	Nephrolepidaceae	Valid	88	224	4	6.2	4.5	9	1.8	false	0	vegetating	1				0	0.1	1	main trunk	Juvenile/Sapling	213		vegetating	65s-102/14	10	21	a028d3b9-43ac-44cd-815b-5812d357af25
20245271411102	20245271411102	2024	5	26	20	46	65s	2024	5	27	14	11	102	2		Fern	FERN_119		Nephrolepis biserrata	Nephrolepidaceae	Valid	97	230	4.5	12	15.5	17.3	3.4	false	0	vegetating	2				0	0.1	1	main trunk	Subadult	214		vegetating	65s-102/15	10	23	95a4423f-67cc-4732-8685-5831090c17d7
20245271411102	20245271411102	2024	5	26	20	46	65s	2024	5	27	14	11	102	2		Fern	FERN_119		Nephrolepis biserrata	Nephrolepidaceae	Valid	1.03	264	18	21	15	30.2	8	false	0	vegetating	1				0	0.3	1	main trunk	Subadult	215		vegetating	65s-102/16	10	28	123693f7-dfb2-4c99-8c87-883f76ac0ac0
20245271411102	20245271411102	2024	5	26	20	46	65s	2024	5	27	14	11	102	2		Fern	FERN_119		Nephrolepis biserrata	Nephrolepidaceae	Valid	1.13	266	9	4.5	6	13	4.5	false	0	vegetating	1				0	0.3	1	main trunk	Subadult	216		vegetating	65s-102/17	10	30	5cecff68-efbd-4347-828f-c67f7588962a
20245271411102	20245271411102	2024	5	26	20	46	65s	2024	5	27	14	11	102	2		Fern	FERN_119		Nephrolepis biserrata	Nephrolepidaceae	Valid	121	234	74	67	64	85	26	false			4				1	1.6	1	main trunk	Adult	217		fruiting	65s-102/18	10	33	665ff40a-e4df-40d8-aeaf-2ad8f88bdc89
20245271411102	20245271411102	2024	5	26	20	46	65s	2024	5	27	14	11	102	2		Fern	FERN_119		Nephrolepis biserrata	Nephrolepidaceae	Valid	158	254	12	12	9	15	4	false	0	vegetating	5				0	0.3	1	main trunk	Subadult	218		vegetating	65s-102/19	10	35	6f55483e-a312-4f4e-8b9a-bbbe6023c70a
20245271411102	20245271411102	2024	5	26	20	46	65s	2024	5	27	14	11	102	2		Fern	FERN_119		Nephrolepis biserrata	Nephrolepidaceae	Valid	1.6	230	21	5	6	21	3.2	false	0	vegetating	1				0	0.1	1	main trunk	Subadult	219		vegetating	65s-102/20	10	41	c5892443-877f-4856-b7f3-b506401a13dd
20245271411102	20245271411102	2024	5	26	20	46	65s	2024	5	27	14	11	102	2		Fern	FERN_119		Nephrolepis biserrata	Nephrolepidaceae	Valid	1.6	230	43	34	30	63	19	false	0	vegetating	1				0	0.4	1	main trunk	Adult	220		vegetating	65s-102/21	10	44	5b40689e-b1b5-4a5a-af7a-c40340027753
20245271411102	20245271411102	2024	5	26	20	46	65s	2024	5	27	14	11	102	2		Fern	FERN_119		Nephrolepis biserrata	Nephrolepidaceae	Valid	165	222	64	67	39	72	16	false	0	vegetating	4					0.8	1	main trunk	Adult	221-224		vegetating	65s-102/22	10	48	499f68eb-6f18-465a-af55-4b0bb59a0b9e
20245271411102	20245271411102	2024	5	26	20	46	65s	2024	5	27	14	11	102	2		Fern	FERN_119		Nephrolepis biserrata	Nephrolepidaceae	Valid	26	170	11	18	24	31	1.5	false	0	vegetating	1				0	0.3	1	main trunk	Subadult	230		vegetating	65s-102/26	11	4	c99f1f81-0cf4-453a-9dfc-ad4d7eb0cfe9
20245271411102	20245271411102	2024	5	26	20	46	65s	2024	5	27	14	11	102	2		Fern	FERN_119		Nephrolepis biserrata	Nephrolepidaceae	Valid	0.5	166	2.6	2.3	6.2	6.5	1.7	false	0	vegetating	2				0	0.2	1	main trunk	Juvenile/Sapling	231		vegetating	65s-102/27	11	8	a0727d02-c9cb-4b88-8042-507fef36b0b2
20245271411102	20245271411102	2024	5	26	20	46	65s	2024	5	27	14	11	102	2		Fern	FERN_119		Nephrolepis biserrata	Nephrolepidaceae	Valid	25	166	44	15	37	43	11.3		0	vegetating	2					0.4	1	main trunk	Subadult	232		vegetating	65s-102/28	11	12	c1a7c6b3-48b1-4322-8edd-90f4888573ac
20245271411102	20245271411102	2024	5	26	20	46	65s	2024	5	27	14	11	102	2		Fern	FERN_120		Nephrolepis biserrata	Nephrolepidaceae	Valid	29	164	4.7	2.8	6.1	7.6	2.3		0	vegetating	1				0	0.1		main trunk	Juvenile/Sapling	233-235		vegetating	65s-102/29	11	14	12375095-1c75-4540-9da2-41025a61b69b
20245271411102	20245271411102	2024	5	26	20	46	65s	2024	5	27	14	11	102	2		Fern	FERN_119		Nephrolepis cordifolia	Nephrolepidaceae	Valid	52	164	20	11	15	24	4	false	0	vegetating	1			0	0	0.1	1	main trunk	Subadult	236		vegetating	65s-102/30	11	16	6d7cd010-2b5e-42ab-bc24-c9a2ecf09375
20245271411102	20245271411102	2024	5	26	20	46	65s	2024	5	27	14	11	102	2		Fern	FERN_119		Nephrolepis cordifolia	Nephrolepidaceae	Valid	76	200	21	11	13	28.2	4	false	0	vegetating	2				0	0.4		main trunk	Adult	237-240		vegetating	65s-102/31	11	18	3408610f-456a-40aa-b571-4906df819213
20245271411102	20245271411102	2024	5	26	20	46	65s	2024	5	27	14	11	102	2		Fern	FERN_119		Nephrolepis biserrata	Nephrolepidaceae	Valid	84	204	34	71	96	122	9	false	0	vegetating	2				0	1.2	1	main trunk	Adult	241		vegetating	65s-102/32	11	24	997a395d-d91a-4558-ac28-6f0816bf07d9
20245271411102	20245271411102	2024	5	26	20	46	65s	2024	5	27	14	11	102	2		Fern	FERN_119		Nephrolepis biserrata	Nephrolepidaceae	Valid	98	214	10.3	2.4	6.9	10.6	2.5	false	0	vegetating	1				0	0.4	1	main trunk	Subadult	242-243		vegetating	65s-102/33	11	28	c4a9851e-1fc6-4e32-8673-a6d29535b738
20245271411102	20245271411102	2024	5	26	20	46	65s	2024	5	27	14	11	102	2		Fern	FERN_119		Nephrolepis biserrata	Nephrolepidaceae	Valid	1.1	200	35	28	23	33.2	7	false	0	vegetating	3				0	0.4	1	main trunk	Subadult	244-246		vegetating	65s-102/34	11	32	a4d7bea2-64d2-4734-95b1-f7a34db9399e
20245271411102	20245271411102	2024	5	26	20	46	65s	2024	5	27	14	11	102	2		Fern	FERN_119		Nephrolepis biserrata	Nephrolepidaceae	Valid	102	182	53	17	48	71	17.5	false	0	vegetating	1				0	0.9	1	main trunk	Adult	247		vegetating	65s-102/35	11	37	5e1a4a51-b4f9-43b7-93b1-2f643de03f34
20245271411102	20245271411102	2024	5	26	20	46	65s	2024	5	27	14	11	102	2		Fern	FERN_119		Nephrolepis biserrata	Nephrolepidaceae	Valid	107	160	38	11	15	41	5	false	0	vegetating	2				0	0.2	1	main trunk	Adult	248		vegetating	65s-102/36	11	40	efb4a4cf-5765-42df-a7b7-3dbfd6e4b883
20245271411102	20245271411102	2024	5	26	20	46	65s	2024	5	27	14	11	102	2		Fern	FERN_119		Nephrolepis biserrata	Nephrolepidaceae	Valid	117	198	22	28	22	34	9	false	0	vegetating	2				0	0.2	1	main trunk	Adult	249		vegetating	65s-102/37	11	42	2b668389-4e6a-4a77-a172-35c647c5d992
20245271411102	20245271411102	2024	5	26	20	46	65s	2024	5	27	14	11	102	2		Fern	FERN_119		Nephrolepis biserrata	Nephrolepidaceae	Valid	123	194	93	73	69	96	24	false	0	vegetating	4					1.4	1	main trunk	Adult	250		vegetating	65s-102/38	11	45	c6189906-dd69-4875-b5a6-a5468cc66f0b
20245271411102	20245271411102	2024	5	26	20	46	65s	2024	5	27	14	11	102	2		Fern	FERN_119		Nephrolepis biserrata	Nephrolepidaceae	Valid	126	190	26	4	22	35	4.5	false	0	vegetating	1				0	0.2		main trunk	Adult	251		vegetating	65s-102/39	11	49	b33f60bd-1cc0-4540-94d7-17b2affee09b
20245271411102	20245271411102	2024	5	26	20	46	65s	2024	5	27	14	11	102	2		Fern	FERN_119		Nephrolepis biserrata	Nephrolepidaceae	Valid	140	190	74	34	67	106	25	false			3				1	1.3	1	main trunk	Adult	252-253		reproducing	65s-102/40	11	52	513cfb4b-3831-4f1d-97c6-51c61c4359cf
20245271411102	20245271411102	2024	5	26	20	46	65s	2024	5	27	14	11	102	2		Fern	FERN_119		Nephrolepis biserrata	Nephrolepidaceae	Valid	1.43	162	53	44	43	65	17.5	false	0	vegetating	4				0	0.8	1	main trunk	Adult	254		vegetating	65s-102/41	11	55	e950d67b-9c7d-466e-a940-51051bc6f42f
20245271411102	20245271411102	2024	5	26	20	46	65s	2024	5	27	14	11	102	2		Fern	FERN_119		Nephrolepis biserrata	Nephrolepidaceae	Valid	137	162	13	16	15	7.5	6.5	false	0	vegetating	2				0	0.4	1	main trunk	Adult	255	Broken	vegetating	65s-102/42	12	1	fc44ba6c-96d6-4dad-a0b3-2e5d5e0dfc43
20245271411102	20245271411102	2024	5	26	20	46	65s	2024	5	27	14	11	102	2		Fern	FERN_119		Nephrolepis cordifolia	Nephrolepidaceae	Valid	1.28	162	34	21	26	35.1	5.1	false	0	vegetating	3				0	0.2	1	main trunk	Adult	256-258		vegetating	65s-102/43	12	4	298d4815-20d3-4619-b507-5bb000f144f5
20245271411102	20245271411102	2024	5	26	20	46	65s	2024	5	27	14	11	102	2		Fern	FERN_119		Nephrolepis biserrata	Nephrolepidaceae	Valid	111	134	58	67	52	72	21	false	0	vegetating	3				0	1.4	1	main trunk	Adult	259		vegetating	65s-102/44	12	6	89cea798-d67e-4d53-9468-db07b05e536b
20245271411102	20245271411102	2024	5	26	20	46	65s	2024	5	27	14	11	102	2		Fern	FERN_119		Nephrolepis cordifolia	Nephrolepidaceae	Valid	105	144	19	6.5	26	32	5	false	0	vegetating	2				0	0.4	1	main trunk	Adult	260-261		vegetating	65s-102/45	12	10	03becbc3-abd4-4c22-bf12-a59a7df9a2c7
20245271411102	20245271411102	2024	5	26	20	46	65s	2024	5	27	14	11	102	2		Fern	FERN_119		Nephrolepis cordifolia	Nephrolepidaceae	Valid	108	142	28	7	20	38	4.5	false	0	vegetating	2				0	0.1	1	main trunk	Adult	262, 263		vegetating	65s-102/46	12	13	62f959ba-546e-4023-9f10-c31f358120c9
20245271411102	20245271411102	2024	5	26	20	46	65s	2024	5	27	14	11	102	2		Fern	FERN_119		Nephrolepis biserrata	Nephrolepidaceae	Valid	88	70	2	3	4.5	4.5	2.5	false	0	vegetating	1				0	0.1	1	main trunk	Born/Seedling	264	Cut	vegetating	65s-102/47	12	15	2aabbc8c-9c3a-498c-98fa-d6ddefbdf099
20245271411102	20245271411102	2024	5	26	20	46	65s	2024	5	27	14	11	102	2		Fern	FERN_119		Nephrolepis cordifolia	Nephrolepidaceae	Valid	56	122	3	3	3.5	4.5	2.1	false	0	vegetating	1				0	0.2	1	main trunk	Juvenile/Sapling	265-269		vegetating	65s-102/48	12	19	0ed75ca8-5b38-4e1b-8e25-672cb86be9b9
20245271411102	20245271411102	2024	5	26	20	46	65s	2024	5	27	14	11	102	2		Fern	FERN_119		Nephrolepis cordifolia	Nephrolepidaceae	Valid	50	112	17.5	11	20	25.5	6	false	0	vegetating	1				0	0.2	1	main trunk	Subadult	270		vegetating	65s-102/49	12	23	562d8640-1dc4-46dc-8818-2a1a8f217f52
20245271411102	20245271411102	2024	5	26	20	46	65s	2024	5	27	14	11	102	2		Fern	FERN_119		Nephrolepis cordifolia	Nephrolepidaceae	Valid	24	112	49	20	27	43	6.2	false	0	vegetating	4				0	0.4	1	main trunk	Adult	271		vegetating	65s-102/50	12	27	66ce5c3e-0fdd-429b-b5f8-32e563a49d81
20245271411102	20245271411102	2024	5	26	20	46	65s	2024	5	27	14	11	102	2		Fern	FERN_119		Nephrolepis biserrata	Nephrolepidaceae	Valid	45	90	37	42	44	53.5	19	false	0	vegetating	4					0.5	1	main trunk	Adult	272		vegetating	65s-102/51	12	30	11088dd3-3a9a-4029-b779-ce4c23023601
20245271411102	20245271411102	2024	5	26	20	46	65s	2024	5	27	14	11	102	2		Fern	FERN_119		Nephrolepis biserrata	Nephrolepidaceae	Valid	33	46	21	40	27	34	11	false	0	vegetating	3				0	0.2	1	main trunk	Adult	273		vegetating	65s-102/52	12	35	6b581228-e416-4f97-95a7-f383efb28a4d
20245271411102	20245271411102	2024	5	26	20	46	65s	2024	5	27	14	11	102	2		Fern	FERN_119		Nephrolepis cordifolia	Nephrolepidaceae	Valid	0.05	40	14	6	19	22	5	false	0	vegetating	1				0	0.5	1	main trunk	Subadult	274		vegetating	65s-102/53	12	37	200512a7-60b7-4876-87c4-2755281b4a5b
20245271411102	20245271411102	2024	5	26	20	46	65s	2024	5	27	14	11	102	2		Fern	FERN_119		Nephrolepis cordifolia	Nephrolepidaceae	Valid	0.03	24	6	18	11	23	4	false	0	vegetating	1				0	0.2	1	main trunk	Subadult	275		vegetating	65s-102/54	12	39	5e962f90-6096-4025-939d-5a2debca2db5
20245271411102	20245271411102	2024	5	26	20	46	65s	2024	5	27	14	11	102	2		Fern	FERN_119		Nephrolepis cordifolia	Nephrolepidaceae	Valid	85.5	32	42	16	25	30.5	4	false	0	vegetating	3					0.4	1	main trunk	Adult	276		vegetating	65s-102/55	12	41	6e3e908d-3d95-4f0a-b335-b1e1f9756050
20245271411102	20245271411102	2024	5	26	20	46	65s	2024	5	27	14	11	102	2		Fern	FERN_119		Nephrolepis cordifolia	Nephrolepidaceae	Valid	1.62	32	18	39	18	26.5	4.5	false	0	vegetating	2				0	0.5	1	main trunk	Subadult	281		vegetating	65s-102/56	13	14	80335605-0399-44ba-8288-bf719aef3e75
20245271411102	20245271411102	2024	5	26	20	46	65s	2024	5	27	14	11	102	2		Fern	FERN_119		Nephrolepis biserrata	Nephrolepidaceae	Valid	176	112	25	50	19	37	10	false	0	vegetating	2				0	0.7	1	main trunk	Adult	282		vegetating	65s-102/57	13	15	eec8bcb1-5c35-46d8-83fa-6d5956e35e14
20245271411102	20245271411102	2024	5	26	20	46	65s	2024	5	27	14	11	102	2		Fern	FERN_119		Nephrolepis biserrata	Nephrolepidaceae	Valid	1.5	188	66	44	48	69	18	false	0	vegetating	8				0	0.9	1	main trunk	Adult	283		vegetating	65s-102/58	13	18	a7f06bce-44e0-4d04-a190-4d2af73762ac
20245271411102	20245271411102	2024	5	26	20	46	65s	2024	5	27	14	11	102	2		Fern	FERN_119		Nephrolepis biserrata	Nephrolepidaceae	Valid	162	210	34		18	20	4	false	0	vegetating	1				0	0.2	1	main trunk	Subadult	285		vegetating	65s-102/59	13	23	b9d87fc5-91b4-48cf-bf20-e2e2dd139606
20245271411102	20245271411102	2024	5	26	20	46	65s	2024	5	27	14	11	102	2		Fern	FERN_119		Nephrolepis biserrata	Nephrolepidaceae	Valid	170	210	22	26	26	34	9	false	0	vegetating	3				0	0.5	1	main trunk	Subadult	286		vegetating	J65s-102/60	13	25	09503718-da6c-4dd4-98a9-0869f86f1d9d
20245271411102	20245271411102	2024	5	26	20	46	65s	2024	5	27	14	11	102	2		Fern	FERN_119		Nephrolepis biserrata	Nephrolepidaceae	Valid	170	180	65	17	42	79	14	false	0	vegetating	1					1.4	1	main trunk	Adult	287		vegetating	65s-102/61	13	28	67f99460-087a-4ee9-aa39-92d04ccfe616
20245271411102	20245271411102	2024	5	26	20	46	65s	2024	5	27	14	11	102	2		Fern	FERN_119		Nephrolepis biserrata	Nephrolepidaceae	Valid	1.8	220	19	23	9	26	5.5	false	0	vegetating	3				0	0.3	1	main trunk	Subadult	288		vegetating	65s-102/62	13	31	4d87263b-40c9-4e3f-ae7b-b5b879488347
20245271411102	20245271411102	2024	5	26	20	46	65s	2024	5	27	14	11	102	2		Fern	FERN_119		Nephrolepis biserrata	Nephrolepidaceae	Valid	1.8	172	11	8	12	13	3	false	0	vegetating	2				0	0.2	1	main trunk	Subadult	289		vegetating	65s-102/63	13	35	7683f4ef-6c62-46b0-9239-43292ee44ad9
20245271411102	20245271411102	2024	5	26	20	46	65s	2024	5	27	14	11	102	2		Fern	FERN_119		Nephrolepis biserrata	Nephrolepidaceae	Valid	2	202				13	2.8	false	0	vegetating	2				0	0.2	1	main trunk	Subadult	290		vegetating	65s-102/64	13	39	d4993ac2-06d7-4b93-be4b-c884859cc0e5
20245271411102	20245271411102	2024	5	26	20	46	65s	2024	5	27	14	11	102	2		Fern	FERN_119		Nephrolepis cordifolia	Nephrolepidaceae	Valid	1.9	174	26	35	37	48	4	false	0	vegetating	5				0	0.5	1	main trunk	Adult	291-293		vegetating	65s-102/65	13	41	31dd8761-3c68-499c-8ee9-e95619b92372
20245271411102	20245271411102	2024	5	26	20	46	65s	2024	5	27	14	11	102	2		Fern	FERN_119		Nephrolepis cordifolia	Nephrolepidaceae	Valid	2	142	12	4	20	25	4	false	0	vegetating	1				0	0.3	1	main trunk	Subadult	294		vegetating	65s-102/66	13	43	43c9e1d7-cd56-493d-a527-1b04b541a400
20245271411102	20245271411102	2024	5	26	20	46	65s	2024	5	27	14	11	102	2		Fern	FERN_119		Nephrolepis cordifolia	Nephrolepidaceae	seedling	177	260	3	3	3.5	3	1.6	false	0	vegetating	2					0.1	1	main trunk	Juvenile/Sapling	295-297		vegetating	65s-102/67	13	47	c7e0d9ea-3f14-4314-8505-b9ee050361fa
20245271411102	20245271411102	2024	5	26	20	46	65s	2024	5	27	14	11	102	2		Fern	FERN_119		Nephrolepis cordifolia	Nephrolepidaceae	seedling	2	260	6	8	6	7.2	2	false	0	vegetating	4				0	0.1	1	main trunk	Juvenile/Sapling	298-299		vegetating	65s-102/68	13	50	264410ad-c097-457f-84b9-2fa0ddd21a56
20245271411102	20245271411102	2024	5	26	20	46	65s	2024	5	27	14	11	102	1		Seed plant	MUS_397		Angraecum pectinatum	orchidaceae	Valid	4.2	80							0	vegetating	20	0	0				2	crown	Adult	103-308		vegetating	65s-102/70	9	45	1c21b5c9-1a29-4b04-98c9-67eda3fe690c
20245271411102	20245271411102	2024	5	26	20	46	65s	2024	5	27	14	11	102	1		Seed plant	MUS_397		Angraecum pectinatum	orchidaceae	Valid	5.6	132							0	vegetating	21	0	1				1	main trunk	Adult	103-311		fruiting	65s-102/71	9	50	97411dcf-1d1d-482b-b97e-46b82b7feb0b
20245271411102	20245271411102	2024	5	26	20	46	65s	2024	5	27	14	11	102	1		Seed plant	MUS_397		Angraecum pectinatum	orchidaceae	Valid	5.6	132							0	vegetating	19	0	0				1	main trunk	Adult	103-310		vegetating	65s-102/72	9	57	3611a613-ddbb-469d-bc92-fa0d993107f6
20245271411102	20245271411102	2024	5	26	20	46	65s	2024	5	27	14	11	102	1		Seed plant	MUS_397		Angraecum pectinatum	orchidaceae	Valid	5.6	132							0	vegetating	10	0	0				1	main trunk	Adult	103-310		vegetating	65s-102/73	9	59	72132489-7423-4f26-9ec9-9d03dfc25c91
20245271411102	20245271411102	2024	5	26	20	46	65s	2024	5	27	14	11	102	1		Seed plant	MUS_397		Angraecum pectinatum	orchidaceae	Valid	5.6	132							0	vegetating	9	0	0				1	main trunk	Adult	103-310		vegetating	65s-102/74	10	0	20b1b2fc-b394-4a7a-8b0d-ebdb073e0128
20245271411102	20245271411102	2024	5	26	20	46	65s	2024	5	27	14	11	102	1		Seed plant	MUS_397		Angraecum pectinatum	orchidaceae	Valid	5.6	132							0	vegetating	16	0	0				1	main trunk	Adult	103-310		vegetating	65s-102/75	10	1	502a44aa-faa9-4a19-98b2-6e2497589fe1
20245271411102	20245271411102	2024	5	26	20	46	65s	2024	5	27	14	11	102	1		Seed plant	MUS_397		Angraecum pectinatum	orchidaceae	Valid	5.6	132							0	vegetating	32	0	0				1	main trunk	Adult	103-310		vegetating	65s-102/76	10	2	0e759f6f-cfeb-4235-8873-61693d788a27
20245271411102	20245271411102	2024	5	26	20	46	65s	2024	5	27	14	11	102	1		Seed plant	MUS_397		Angraecum pectinatum	orchidaceae	Valid	4	286							0	vegetating	28	0	0				1	main trunk	Adult	103-312/313		vegetating	65s-102/77	10	5	0ecf6b32-9209-40af-9f4d-c815f76b1b8b
20245271411102	20245271411102	2024	5	26	20	46	65s	2024	5	27	14	11	102	1		Seed plant	MUS_397		Angraecum pectinatum	orchidaceae	Valid	4.3	30							0	flower bud	26	1	0				2	crown	Adult	103-314		vegetating	65s-102/78	10	10	97ae08e2-a4df-48f9-b6db-c39e6a534de7
20245271411102	20245271411102	2024	5	26	20	46	65s	2024	5	27	14	11	102	1		Seed plant	MUS_397		Angraecum pectinatum	orchidaceae	Valid	4.3	36							0	vegetating	18	0	0				2	crown	Adult	103-315		vegetating	65s-102/79	10	14	dcce78c3-3067-4183-bd72-538706c36298
20245271411102	20245271411102	2024	5	26	20	46	65s	2024	5	27	14	11	102	1		Seed plant	MUS_397		Angraecum pectinatum	orchidaceae	Valid	6	76							0	vegetating	5	0	0				1	main trunk	Adult	103-317		vegetating	65s-102/80	10	16	d00cc5a0-8758-4644-9da8-f38a4dda9d75
20245271411102	20245271411102	2024	5	26	20	46	65s	2024	5	27	14	11	102	1		Seed plant	MUS_397		Angraecum pectinatum	orchidaceae	Valid	6	76							0	vegetating	6	0	0				1	main trunk	Adult	103-317/318		vegetating	65s-102/81	10	22	5ab4ae0b-1d84-4c3a-b1ed-49cca258cdd8
20246181050141	20246181050141	2024	5	26	20	46	65s	2024	6	18	10	50	141	2		Fern	zz		Selaginella sp.	Selaginellaceae	Valid	0.5	234						false									1	main trunk	Adult	103-328			65s-141/1	11	5	44d471a5-b862-455f-ad51-5a0b87f669b8
20246181050141	20246181050141	2024	5	26	20	46	65s	2024	6	18	10	50	141	2		Fern	zz		Microsorum punctatum	Polypodiaceae	Valid	0.5	4	51	40	45	46.2	6.6	false	0	vegetating	9	0	0				1	main trunk	Subadult	103-329		vegetating	65s-141/2	11	12	22215d84-d64d-4dce-a66e-7ee4e925bbf1
20246181050141	20246181050141	2024	5	26	20	46	65s	2024	6	18	10	50	141	2		Fern	zz		Nephrolepis cordifolia	Nephrolepidaceae	Valid	1.73	42	5.5	7	3	7.5	2.5	false	0	vegetating	1	0	0				1	main trunk	Subadult	103-330-336		vegetating	65s-141/3	11	16	06358455-75a0-48b3-a38f-9ff7014d5c7e
20246181050141	20246181050141	2024	5	26	20	46	65s	2024	6	18	10	50	141	2		Fern	zz		Nephrolepis cordifolia	Nephrolepidaceae	Valid	1.78	114	17	21	18	20.5	3	false	0	vegetating	6	0	0				1	main trunk	Subadult	103-337-340		vegetating	65s-141/4	11	23	7cbec1a5-6fb3-403e-b23f-641156d3ce38
20246181050141	20246181050141	2024	5	26	20	46	65s	2024	6	18	10	50	141	2		Fern	zz		Nephrolepis cordifolia	Nephrolepidaceae	Valid	1.91	266	2.5	9	6	8.5	2.5	false	0	vegetating	1	0	0		0		1	main trunk	Subadult	103-341-344		vegetating	65s-141/5	11	27	c4f48fe2-98f2-4942-bf60-eba450083c8a
20246181050141	20246181050141	2024	5	26	20	46	65s	2024	6	18	10	50	141	2		Fern	zz		Nephrolepis cordifolia	Nephrolepidaceae	Valid	2.1	226				20	3.5	false	0	vegetating	3	0	0		0		1	main trunk	Adult	103-345-346		vegetating	65s-141/6	11	31	e29733fe-d8f7-42fd-b5b4-b6d9afaba102
20246181050141	20246181050141	2024	5	26	20	46	65s	2024	6	18	10	50	141	2		Fern	FERN_121		Microsorum punctatum	Polypodiaceae	Valid	1.88	162	124	123	62	71	9.2	false	0	vegetating	27	0	0		0		1	main trunk	Adult	103-347-348		vegetating	65s-141/7	11	35	dc244d37-11eb-4f42-b255-90c3ad0a7877
20246181050141	20246181050141	2024	5	26	20	46	65s	2024	6	18	10	50	141	2		Fern	zz		Nephrolepis cordifolia	Nephrolepidaceae	Valid	3.76	272						false	0	vegetating	4	0	0		0		1	main trunk	Subadult	103-349-351		vegetating	65s-141/8	11	41	1b352250-cb4b-47ff-b050-23cbcc3ceb6a
20246181050141	20246181050141	2024	5	26	20	46	65s	2024	6	18	10	50	141	2		Fern	zz		Nephrolepis cordifolia	Nephrolepidaceae	Valid	4.7	122						false	0	vegetating	1	0	0		0		1	main trunk	Subadult	103-352-353		vegetating	65s-141/9	11	44	826349c5-1f7a-422f-a7d1-a752b1a034e9
20246181050141	20246181050141	2024	5	26	20	46	65s	2024	6	18	10	50	141	2		Fern	zz		Nephrolepis cordifolia	Nephrolepidaceae	Valid	4.96	324						false	0	vegetating	6	0	0				2	crown	Adult	103-354-355		vegetating	65s-141/10	11	49	69563d29-0e94-40cc-8a7f-f052eb191331
20246181050141	20246181050141	2024	5	26	20	46	65s	2024	6	18	10	50	141	2		Fern	zz		Nephrolepis cordifolia	Nephrolepidaceae	Valid	5	200						false	0	vegetating	4						2	crown	Adult	103-356-357		vegetating	65s-141/11	11	53	5aadb420-ab42-4612-8073-7e5710bfb736
20246181050141	20246181050141	2024	5	26	20	46	65s	2024	6	18	10	50	141	2		Fern	zz		Nephrolepis cordifolia	Nephrolepidaceae	Valid	5.5	140						false	0	vegetating	1					0	2	crown	Subadult	103-358-359		vegetating	65s-141/12	11	55	14e3604b-58de-493a-9e28-e3c41d973be2
20246181050141	20246181050141	2024	5	26	20	46	65s	2024	6	18	10	50	141	2		Fern	zz		Nephrolepis cordifolia	Nephrolepidaceae	Valid	5.2	144						false	0	vegetating	4						2	crown	Adult	103-360		vegetating	65s-141/13	11	59	54a59060-f9f0-4a73-abfc-5f45663d9e6f
20246181050141	20246181050141	2024	5	26	20	46	65s	2024	6	18	10	50	141	2		Fern	zz		Nephrolepis cordifolia	Nephrolepidaceae	Valid	5.2	144						false	0	vegetating	1						2	crown	Subadult	103-362		vegetating	65s-141/14	12	3	0948f49e-aee8-48fe-8404-002ca9b19860
20246181050141	20246181050141	2024	5	26	20	46	65s	2024	6	18	10	50	141	2		Fern	zz		Nephrolepis cordifolia	Nephrolepidaceae	Valid	5.3	144						false	0	vegetating	1						2	crown	Subadult	103-363		vegetating	65s-141/15	12	6	7e37a8a8-0e9d-4d63-ab7f-5ed3c115539e
20246181050141	20246181050141	2024	5	26	20	46	65s	2024	6	18	10	50	141	1		Seed plant	MUS_508		Piper borbonense	Piperaceae	Valid	2.2					6	4	false	0	vegetating	24					0.3	1	main trunk	Adult	103-364		vegetating	65s-141/16	12	27	768d45bd-13cd-4391-8a86-04494bdc6bc2
20246181050141	20246181050141	2024	5	26	20	46	65s	2024	6	18	10	50	141	1		Seed plant	MUS_106		Cnestis polyphylla	Connaraceae	Valid								false	0	vegetating						1.6	1	main trunk	Adult	103-365-366	Going up to crown.	vegetating	65s-141/17	12	30	30a61313-3fbd-4fe9-a92c-f3aa0a2306ad
20246181050141	20246181050141	2024	5	26	20	46	65s	2024	6	18	10	50	141	1		Seed plant	MUS_383		Angraecum sp.	orchidaceae	Valid	1.06	180	20	12	11	11.5	1	false	0	dry/fallen fruit	8	0	0	0			1	main trunk	Adult	103-369-371		vegetating	65s-141/18	12	40	b86ad8a3-ae77-4e4a-8ca6-5281ba26633b
20246181050141	20246181050141	2024	5	26	20	46	65s	2024	6	18	10	50	141	1		Seed plant	MUS_383		Angraecum sp.	orchidaceae	Valid	1.46	312	18	14	12.5	14.5	0.7	false	0	vegetating	9						1	main trunk	Adult	103-372-374		vegetating	65s-141/19	12	49	3d16a397-c6cc-46a0-8eef-5b60e74b8004
20246181050141	20246181050141	2024	5	26	20	46	65s	2024	6	18	10	50	141	1		Seed plant	MUS_397		Angraecum pectinatum	orchidaceae	Valid	2.01	74	1.4	1.9	1.7	1.1	0.2	false	0	vegetating	5						1	main trunk	Juvenile/Sapling	103-380		vegetating	65s-141/21	12	57	be77208f-9dc2-4130-853d-f3768e21b205
20246181050141	20246181050141	2024	5	26	20	46	65s	2024	6	18	10	50	141	1		Seed plant	MUS_397		Angraecum pectinatum	orchidaceae	Valid	2.32	160						false	0	vegetating	4						1	main trunk	Juvenile/Sapling			vegetating	65s-141/22	13	1	dd1735d3-4d97-49d7-b3ba-322e7c390f72
20246181050141	20246181050141	2024	5	26	20	46	65s	2024	6	18	10	50	141	1		Seed plant	MUS_397		Angraecum pectinatum	orchidaceae	Valid	2.44	182						false	0	vegetating	4						1	main trunk	Juvenile/Sapling			vegetating	65s-141/23	13	4	99074208-0fad-4166-b3e2-fc43bfd71d74
20246181050141	20246181050141	2024	5	26	20	46	65s	2024	6	18	10	50	141	1		Seed plant	MUS_397		Angraecum pectinatum	orchidaceae	Valid	2.5	182						false	0	vegetating	4						1	main trunk	Juvenile/Sapling			vegetating	65s-141/24	13	5	2cb99cc6-e604-4812-8c6b-7d2895fb0b71
20246181050141	20246181050141	2024	5	26	20	46	65s	2024	6	18	10	50	141	1		Seed plant	MUS_397		Angraecum pectinatum	orchidaceae	Valid	3.2	124						false	0	vegetating	3						1	main trunk	Juvenile/Sapling			vegetating	65s-141/25	13	7	672896c2-7475-4bd6-abf1-b2762d5249e1
20246181050141	20246181050141	2024	5	26	20	46	65s	2024	6	18	10	50	141	1		Seed plant	MUS_397		Angraecum pectinatum	orchidaceae	Valid	3.21	240						false	0	vegetating	3						1	main trunk	Juvenile/Sapling			vegetating	65s-141/26	13	9	cd70eda7-befe-4948-9add-c7549ddd33af
20246181050141	20246181050141	2024	5	26	20	46	65s	2024	6	18	10	50	141	1		Seed plant	MUS_397		Angraecum pectinatum	orchidaceae	Valid	4.8	220						false	0	vegetating	4						1	main trunk	Juvenile/Sapling			vegetating	65s-141/27	13	12	7b0610a0-eb4b-4925-8126-ad18e923509e
20246181050141	20246181050141	2024	5	26	20	46	65s	2024	6	18	10	50	141	1		Seed plant	MUS_397		Angraecum pectinatum	orchidaceae	Valid	1.2	170	1.6	1.9	1.7	1.3	0.3	false	0	vegetating	4	0	0				1	main trunk	Juvenile/Sapling	103-381-382		vegetating	65s-141/28	13	21	cbf56526-11fd-4003-a69b-becc0c0728f5
20246181050141	20246181050141	2024	5	26	20	46	65s	2024	6	18	10	50	141	1		Seed plant	MUS_397		Angraecum mauritianum	orchidaceae	Valid	1.64	172	1.5	1.3	1.5	1.4	0.1	false	0	vegetating	4						1	main trunk	Juvenile/Sapling	103-383-385	To idenbtify.	vegetating	65s-141/29	13	24	1dcf2e85-903e-4ee9-bf11-e1424c58a2d2
20246181050141	20246181050141	2024	5	26	20	46	65s	2024	6	18	10	50	141	1		Seed plant	MUS_397		Angraecum pectinatum	orchidaceae	Valid	2.36	230						false	0	vegetating	8						1	main trunk	Adult	103-386		vegetating	65s-141/30	13	29	6497b330-9746-422f-926f-141da4c67b6d
20246181050141	20246181050141	2024	5	26	20	46	65s	2024	6	18	10	50	141	1		Seed plant	MUS_397		Angraecum pectinatum	orchidaceae	Valid	2.56	208						false	0	vegetating	9						1	main trunk	Adult	103-387		vegetating	65s-141/31	13	30	759c495b-21c2-4b29-98a8-8355d755800c
20246181050141	20246181050141	2024	5	26	20	46	65s	2024	6	18	10	50	141	1		Seed plant	MUS_397		Angraecum pectinatum	orchidaceae	Valid	2.92							false	0	vegetating	7						1	main trunk	Adult	103-390		vegetating	65s-141/32	13	33	599926bb-aef7-4b40-8e1a-c93bbf330ce8
20246181050141	20246181050141	2024	5	26	20	46	65s	2024	6	18	10	50	141	1		Seed plant	MUS_397		Angraecum pectinatum	orchidaceae	Valid	4.24	236						false	0	vegetating	20						1	main trunk	Adult	103-393		vegetating	65s-141/33	13	36	b073f0c2-dbcc-460e-a646-b89856d953c3
20246181050141	20246181050141	2024	5	26	20	46	65s	2024	6	18	10	50	141	1		Seed plant	MUS_397		Angraecum pectinatum	orchidaceae	Valid	4.27	236						false	0	vegetating	8						1	main trunk	Adult	103-395		vegetating	65s-141/34	13	40	f7910da4-58e3-4202-b9a9-acdc29bada9d
20246181050141	20246181050141	2024	5	26	20	46	65s	2024	6	18	10	50	141	1		Seed plant	MUS_397		Angraecum pectinatum	orchidaceae	Valid	4.53	194						false	0	vegetating	27						1	main trunk	Adult	103-396		vegetating	65s-141/35	13	41	20f8c640-c98b-4cb3-b394-4793e8bb9763
20246181050141	20246181050141	2024	5	26	20	46	65s	2024	6	18	10	50	141	1		Seed plant	MUS_397		Angraecum pectinatum	orchidaceae	Valid	4.73	222						false	0	vegetating	8						1	main trunk	Adult	103-397		vegetating	65s-141/36	13	45	4ddeb0fa-cb73-458d-85bc-b921ad483f88
20246181050141	20246181050141	2024	5	26	20	46	65s	2024	6	18	10	50	141	1		Seed plant	zz		Angraecum sp.	orchidaceae	Valid	6.5	330						false	0	dry/fallen fruit	5						2	crown	Adult	103-398-399		vegetating	65s-141/37	13	47	5a073b5d-08a9-4d24-89d2-9a6206051260
202475814148	202475814148	2024	7	5	8	13	65s	2024	7	5	8	14	148	1		Seed plant	MUS_508		Piper borbonense	Piperaceae	Valid	7	224							0	vegetating		0	0				1	main trunk	Adult	103-479-480		vegetating	65s-148/1	8	21	c54f5d6f-c539-4f37-9255-848d67488e8b
202475814148	202475814148	2024	7	5	8	13	65s	2024	7	5	8	14	148	2		Fern	FERN_169		Lepisorus spicata	Polypodiaceae	Valid	4.7	70						false	4	ripe fruit	5				2		1	main trunk	Adult	481		reproducing	65s-148/2	8	29	80be61b9-86e7-4fa8-9537-b086c216f228
202475814148	202475814148	2024	7	5	8	13	65s	2024	7	5	8	14	148	2		Fern	zz		Rumohra adiantiformis	Dryopteridaceae	aff.	6	126						false	0	vegetating	4						1	main trunk	Subadult	483-484		vegetating	65s-148/3	8	34	6f17d3e1-be8d-49bd-9919-f13583b65b19
202475814148	202475814148	2024	7	5	8	13	65s	2024	7	5	8	14	148	2		Fern	FERN_121		Microsorum punctatum	Polypodiaceae	Valid	6.5	From 0 to 360							0	vegetating					0		1	main trunk	Adult	485-488		vegetating	65s-148/4	8	40	056affe6-7713-4174-a5d6-7526a7e9168d
202475814148	202475814148	2024	7	5	8	13	65s	2024	7	5	8	14	148	2		Fern	FERN_121		Microsorum punctatum	Polypodiaceae	Valid	6.5	From 0 to 360							0	vegetating					0		1	main trunk	Adult	485-488		vegetating	65s-148/4b	8	40	056affe6-7713-4174-a5d6-7526a7e9168d1
202475814148	202475814148	2024	7	5	8	13	65s	2024	7	5	8	14	148	2		Fern	FERN_121		Microsorum punctatum	Polypodiaceae	Valid	6.5	From 0 to 360							0	vegetating					0		1	main trunk	Adult	485-488		vegetating	65s-148/4c	8	40	056affe6-7713-4174-a5d6-7526a7e9168d2
202475814148	202475814148	2024	7	5	8	13	65s	2024	7	5	8	14	148	2		Fern	FERN_121		Microsorum punctatum	Polypodiaceae	Valid	8	All around															1	main trunk	Adult	489-490			65s-148/	8	45	bc5bda81-2922-41d4-af3d-e77fbc4346bd
202475814148	202475814148	2024	7	5	8	13	65s	2024	7	5	8	14	148	1		Seed plant	MUS_106		Cnestis polyphylla	Connaraceae	Valid	9	26						false	0	vegetating							1	main trunk	Adult	491-92			65s-148/6	8	50	74c99d63-9c18-4d2b-a65f-faaa9748b1e6
202475814148	202475814148	2024	7	5	8	13	65s	2024	7	5	8	14	148	2		Fern	FERN_121		Asplenium nidus var. nidus	Aspleniaceae	Valid	0.8	20	11	12	7	6.4	1.2	true	0	vegetating	19				0	0.2	1	main trunk	Juvenile/Sapling	493-495		vegetating	65s-148/7	8	55	f2f1e374-7971-4183-bb3a-7636a04ed48c
202475814148	202475814148	2024	7	5	8	13	65s	2024	7	5	8	14	148	1		Seed plant	MUS_383		Angraecum mauritianum	orchidaceae	Valid	3.2	174						false	0	vegetating	4	0	0				1	main trunk	Adult	496-497		vegetating	65s-148/8	9	2	cadaa517-90d8-4616-91f5-a265d6a82b9c
202475814148	202475814148	2024	7	5	8	13	65s	2024	7	5	8	14	148	1		Seed plant	MUS_397		Angraecum pectinatum	orchidaceae	Valid	4	226						false	0	vegetating	9	0	0				1	main trunk	Adult	498		vegetating	65s-148/9	9	7	1485b0f7-9331-4f21-91bf-8a9905413bef
202475814148	202475814148	2024	7	5	8	13	65s	2024	7	5	8	14	148	1		Seed plant	MUS_397		Angraecum pectinatum	orchidaceae	Valid	4.1	228						false	0	vegetating	8	0	0				1	main trunk	Juvenile/Sapling	499		vegetating	65s-148/10	9	8	36c3627c-c727-4a1a-8d66-445b97474dd2
202475814148	202475814148	2024	7	5	8	13	65s	2024	7	5	8	14	148	1		Seed plant	MUS_397		Angraecum pectinatum	orchidaceae	Valid	4.2	226						false	0	vegetating	21	0	0				1	main trunk	Adult	500		vegetating	65s-148/11	9	10	ecb966e1-d3eb-49c8-9c4b-c928071e22a4
202475814148	202475814148	2024	7	5	8	13	65s	2024	7	5	8	14	148	1		Seed plant	MUS_397		Angraecum pectinatum	orchidaceae	Valid	7	40						false	0	vegetating	7	0	0				1	main trunk	Adult	501		vegetating	65s-148/12	9	15	34d88b51-d977-4eee-9ca1-719c85ef7781
202475814148	202475814148	2024	7	5	8	13	65s	2024	7	5	8	14	148	1		Seed plant	MUS_397		Angraecum pectinatum	orchidaceae	Valid	7.2	40						false	0	vegetating	4	0					1	main trunk	Adult	502, 506-508	Maybe 1 fruit		65s-148/13	9	17	dd2ac217-a70b-4a73-b33c-d7fa6da1452c
202475814148	202475814148	2024	7	5	8	13	65s	2024	7	5	8	14	148	1		Seed plant	MUS_397		Angraecum pectinatum	orchidaceae	Valid	7.3	220						false	0	vegetating	13	0	0				1	main trunk	Adult	503		vegetating	65s-148/14	9	21	e510ed6c-dd31-4f3d-b026-a319403bedcf
202475814148	202475814148	2024	7	5	8	13	65s	2024	7	5	8	14	148	1		Seed plant	MUS_397		Angraecum pectinatum	orchidaceae	Valid	7.5	220						false	0	vegetating	8	0	0				1	main trunk	Adult	505		vegetating	65s-148/15	9	22	b28df7cd-c329-4737-aa44-8f5cc9b5a522
202475814148	202475814148	2024	7	5	8	13	65s	2024	7	5	8	14	148	1		Seed plant	MUS_397		Angraecum pectinatum	orchidaceae	Valid	6.5	126						false	0	vegetating	3	0	0				1	main trunk	Juvenile/Sapling	509		vegetating	65s-148/16	9	29	8ad16474-7154-4a9d-8d99-fb602c71e8d9
202475814148	202475814148	2024	7	5	8	13	65s	2024	7	5	8	14	148	1		Seed plant	MUS_397		Angraecum pectinatum	orchidaceae	Valid	7	10						false	0	vegetating	6	0	0				1	main trunk	Juvenile/Sapling	510		vegetating	65s-148/17	9	31	06214f3b-4143-4bb4-85be-b123cd65c3d8
202475814148	202475814148	2024	7	5	8	13	65s	2024	7	5	8	14	148	1		Seed plant	MUS_397		Angraecum pectinatum	orchidaceae	Valid	8	78						false	0	vegetating	6	0	0				1	main trunk	Juvenile/Sapling	511		vegetating	65s-148/18	9	32	54ce46f1-3e59-4e2c-a5be-e6c5e36644ec
202475814148	202475814148	2024	7	5	8	13	65s	2024	7	5	8	14	148	1		Seed plant	MUS_397		Angraecum pectinatum	orchidaceae	Valid	8	78						false	0	vegetating	5	0	0				1	main trunk	Juvenile/Sapling	511	Right one	vegetating	65s-148/19	9	34	f00c38cf-3d12-4914-868c-8dbd8a41fe20
202475814148	202475814148	2024	7	5	8	13	65s	2024	7	5	8	14	148	1		Seed plant	INV_75		Cnestis polyphylla	Connaraceae	Valid	7	48						false	0	vegetating		0	0				1	main trunk	Adult	512		vegetating	65s-148/20	9	36	ad08de15-811c-4e13-b98c-dc7fb05e3a36
202475814148	202475814148	2024	7	5	8	13	65s	2024	7	5	8	14	148	1		Seed plant	MUS_106		Cnestis polyphylla	Connaraceae	Valid	9							false	0	vegetating		0	0				1	main trunk	Adult	513-514	Extend to zone 3	vegetating	65s-148/21	9	38	677f884e-3829-45fd-a2f9-80cb85d4295d
202475945148	202475945148	2024	7	5	8	13	65s	2024	7	5	9	45	148	2		Fern	FERN_173		Microsorum punctatum	Polypodiaceae	Valid	0.33	166	14	9	24	24.5	2.8	true	0	vegetating					0	0.5	1	main trunk	Juvenile/Sapling			vegetating	65s-148/1	9	58	a0a28e11-db33-4a48-93cf-b0dcab131eeb
202475945148	202475945148	2024	7	5	8	13	65s	2024	7	5	9	45	148	2		Fern	FERN_169		Lepisorus spicata	Polypodiaceae	Valid	1.55	196	5	10	19	19	1.4	true	4	ripe fruit	4				2	0.3	1	main trunk	Adult			reproducing	65s-148/2	10	2	12f726a1-5630-41fa-8c54-0d4e321d0e27
2024751045149	2024751045149	2024	7	5	8	13	65s	2024	7	5	10	45	149	2		Fern	FERN_78		Nephrolepis cordifolia	Nephrolepidaceae	Valid	0.3	66	10	11	8.5	12.5	2.5	false	0	vegetating	3				0	0.1	1	main trunk	Juvenile/Sapling			vegetating	65s-149/1	11	3	f8b22510-c718-46d6-bfd4-2f6988aff2cb
2024751045149	2024751045149	2024	7	5	8	13	65s	2024	7	5	10	45	149	2		Fern	FERN_78		Nephrolepis cordifolia	Nephrolepidaceae	Valid	0.39	66	2	4	2.5	4	1.5	false	0	vegetating	2				0		1	main trunk	Juvenile/Sapling			vegetating	65s-149/2	11	5	800ca75b-0678-4de2-838c-f070f135613f
2024751045149	2024751045149	2024	7	5	8	13	65s	2024	7	5	10	45	149	2		Fern	FERN_77		Nephrolepis cordifolia	Nephrolepidaceae	Valid	0.45	64	8	7	101	10	2.5	false	0	vegetating	2				0	0.1	1	main trunk	Juvenile/Sapling			vegetating	65s-149/3	11	8	0d082fc5-a36e-4640-8a9e-a36a83afa134
2024751045149	2024751045149	2024	7	5	8	13	65s	2024	7	5	10	45	149	2		Fern	FERN_78		Nephrolepis cordifolia	Nephrolepidaceae	Valid	0.2	340	3.5	4	6	4	2.5	false	0	vegetating	1				0	0.1	1	main trunk	Juvenile/Sapling			vegetating	65s-149/4	11	11	7d4b08c6-3dab-4e78-8714-a346b567195e
2024751045149	2024751045149	2024	7	5	8	13	65s	2024	7	5	10	45	149	1		Seed plant	MUS_383		Angraecum sp.	orchidaceae	Valid	2.1	264						true	0	vegetating	6	0	0				1	main trunk	Subadult	516-19		vegetating	65s-149/5	11	14	f0b6610d-f5d7-4d11-94d1-7a6841d0f9e8
2024751045149	2024751045149	2024	7	5	8	13	65s	2024	7	5	10	45	149	2		Fern	FERN_78		Nephrolepis cordifolia	Nephrolepidaceae	Valid	2.4	180						false	0	vegetating	3				0		1	main trunk	Adult	520		vegetating	65s-149/6	11	20	dda55a2f-e322-4772-a979-7ba1f8a255be
2024751045149	2024751045149	2024	7	5	8	13	65s	2024	7	5	10	45	149	2		Fern	FERN_78		Nephrolepis cordifolia	Nephrolepidaceae	Valid	2.4	180						false	0	vegetating	4				0		1	main trunk	Adult	521		vegetating	65s-149/7	11	24	3659e8a3-d0da-485d-bd20-aaf1d5efa581
2024751045149	2024751045149	2024	7	5	8	13	65s	2024	7	5	10	45	149	2		Fern	FERN_78		Nephrolepis cordifolia	Nephrolepidaceae	Valid	2.4	180						false	0	vegetating	6				0		1	main trunk	Adult	523		vegetating	65s-149/8	11	25	e0fd7d04-d641-4fa1-9608-9625e9806dfb
2024751045149	2024751045149	2024	7	5	8	13	65s	2024	7	5	10	45	149	1		Seed plant	MUS_575		Scutia myrtina	Rhamnaceae	Valid	3.4	122							0	vegetating		0	0				1	main trunk	Adult	524-525		vegetating	65s-149/9	11	26	c75e43a4-dcac-4143-988f-98e2eed3f09b
2024751045149	2024751045149	2024	7	5	8	13	65s	2024	7	5	10	45	149	1		Seed plant	MUS_397		Angraecum pectinatum	orchidaceae	Valid	3.7	130						false	0	vegetating	8	0	0				1	main trunk	Subadult	526		vegetating	65s-149/10	11	30	f3c2bd38-5b47-4180-8fa8-504b46f562bb
2024751045149	2024751045149	2024	7	5	8	13	65s	2024	7	5	10	45	149	2		Fern	FERN_78		Nephrolepis cordifolia	Nephrolepidaceae	Valid	4.9	130						false	0	vegetating	3				0		1	main trunk	Subadult	527	At the fork	vegetating	65s-149/11	11	41	95ee0f58-5325-4152-b227-0b8586754c1b
2024751045149	2024751045149	2024	7	5	8	13	65s	2024	7	5	10	45	149	2		Fern	FERN_78		Nephrolepis cordifolia	Nephrolepidaceae	Valid	4.9	130							0	vegetating	2						1	main trunk	Adult	528	At the fork	vegetating	65s-149/12	11	43	d8523593-b7ff-477a-9767-aca043103229
2024751045149	2024751045149	2024	7	5	8	13	65s	2024	7	5	10	45	149	1		Seed plant	MUS_397		Angraecum pectinatum	orchidaceae	Valid	5	94						false	0	vegetating	16	0	0				2	crown	Subadult	529-530		vegetating	65s-149/13	11	45	93e70eab-490b-45d9-ad2d-fd2ccd5e761e
2024751045149	2024751045149	2024	7	5	8	13	65s	2024	7	5	10	45	149	2		Fern	FERN_173		Microsorum punctatum	Polypodiaceae	Valid	5.1	130						false	0	vegetating	4				0		2	crown	Juvenile/Sapling	531		vegetating	65s-149/14	11	48	d6f642b4-3b42-4ecd-8a64-a50e80bdbf01
2024751045149	2024751045149	2024	7	5	8	13	65s	2024	7	5	10	45	149	1		Seed plant	MUS_397		Angraecum pectinatum	orchidaceae	Valid	5.1	90						false	0	vegetating	22	0	0				2	crown	Adult	532		vegetating	65s-149/16	11	50	8877b270-ef48-49ff-bffb-a3b9acd4c33e
2024751045149	2024751045149	2024	7	5	8	13	65s	2024	7	5	10	45	149	1		Seed plant	MUS_397		Angraecum pectinatum	orchidaceae	Valid	5.3	90						false	0	vegetating	4	0	0				2	crown	Juvenile/Sapling	533		vegetating	65s-149/17	11	53	bc267c70-e8c8-44c9-821c-6cafc9bad08b
2024751045149	2024751045149	2024	7	5	8	13	65s	2024	7	5	10	45	149	1		Seed plant	MUS_397		Angraecum pectinatum	orchidaceae	Valid	5.3	90						false	0	vegetating	7	0	0				2	crown	Adult	533		vegetating	65s-149/18	11	54	c26f3164-10dc-40a3-8343-6ad813819043
2024751045149	2024751045149	2024	7	5	8	13	65s	2024	7	5	10	45	149	1		Seed plant	MUS_397		Angraecum pectinatum	orchidaceae	Valid	5.3	90						false	0	vegetating		0	0				2	crown	Adult	533		vegetating	65s-149/19	11	55	0fe96df5-c2d4-4a64-b5db-a53cab8ecbee
2024751045149	2024751045149	2024	7	5	8	13	65s	2024	7	5	10	45	149	1		Seed plant	MUS_397		Angraecum pectinatum	orchidaceae	Valid	5.5	90						false	0	vegetating	31	0	0				2	crown	Adult	534		vegetating	65s-149/20	11	57	2052240f-f1c6-4605-8e36-32e16661a68b
2024751045149	2024751045149	2024	7	5	8	13	65s	2024	7	5	10	45	149	1		Seed plant	MUS_397		Angraecum pectinatum	orchidaceae	Valid	5.8	120						false	0	vegetating	5	0	0				2	crown	Juvenile/Sapling	535			65s-149/21	12	0	20f78e9e-33b7-4d6a-915a-55c4e4c5e97b
2024751045149	2024751045149	2024	7	5	8	13	65s	2024	7	5	10	45	149	2		Fern	FERN_78		Nephrolepis cordifolia	Nephrolepidaceae	Valid	5.8	150						false			1				0		2	crown	Adult	535			65s-149/22	12	3	416c1b63-b336-454b-9558-2ee2cf756a6c
2024751045149	2024751045149	2024	7	5	8	13	65s	2024	7	5	10	45	149	2		Fern	FERN_78		Nephrolepis cordifolia	Nephrolepidaceae	Valid	5.8	130						false	0	vegetating	1				0		2	crown	Adult	535		vegetating	65s-149/23	12	4	f817352e-537b-4979-88f6-673554d01d2e
2024751045149	2024751045149	2024	7	5	8	13	65s	2024	7	5	10	45	149	2		Fern	FERN_78		Nephrolepis cordifolia	Nephrolepidaceae	Valid	5.8	130						false	0	vegetating	2				0		2	crown	Adult	535		vegetating	65s-149/24	12	5	4d1f304f-8e0e-4d35-8a67-099c849fb648
2024751045149	2024751045149	2024	7	5	8	13	65s	2024	7	5	10	45	149	1		Seed plant	MUS_397		Angraecum pectinatum	orchidaceae	Valid	5.9	130						false	0	vegetating	5	0	0				2	crown	Juvenile/Sapling	535		vegetating	65s-149/24	12	6	2346fd3d-ea6e-4685-a88e-5bca580d812d
2024751045149	2024751045149	2024	7	5	8	13	65s	2024	7	5	10	45	149	1		Seed plant	MUS_397		Angraecum pectinatum	orchidaceae	Valid	6.1	80						false	0	vegetating	4	0	0				2	crown	Juvenile/Sapling	536		vegetating	65s-149/27	12	13	f2f58f9b-add9-4cf7-a51c-673f5cb28459
2024751045149	2024751045149	2024	7	5	8	13	65s	2024	7	5	10	45	149	1		Seed plant	MUS_397		Angraecum pectinatum	orchidaceae	Valid	6.2	80						false	3	unripe fruit		0	1				2	crown	Adult	537		fruiting	65s-149/28	12	14	c6601da4-f0c5-4283-ac54-2cd8ac9dfd44
2024751045149	2024751045149	2024	7	5	8	13	65s	2024	7	5	10	45	149	1		Seed plant	MUS_397		Angraecum pectinatum	orchidaceae	Valid	6.3	80						false	3	unripe fruit		0	1				2	crown	Adult	538	Several stems	fruiting	65s-149/29	12	15	969361e7-1728-4482-b426-df79b75ad811
2024751045149	2024751045149	2024	7	5	8	13	65s	2024	7	5	10	45	149	1		Seed plant	MUS_397		Angraecum pectinatum	orchidaceae	Valid	6.3	80						false	0	vegetating							2	crown	Adult	539	Several stems	vegetating	65s-149/30	12	17	a4c47e1f-6061-41cd-817e-c1f464b6d82a
2024751045149	2024751045149	2024	7	5	8	13	65s	2024	7	5	10	45	149	1		Seed plant	MUS_397		Angraecum pectinatum	orchidaceae	Valid	6.5	160						false	0	vegetating		0	0				2	crown	Adult	540		vegetating	65s-149/31	12	19	98f7fefe-977e-4b90-9687-8d63ab66f223
2024751045149	2024751045149	2024	7	5	8	13	65s	2024	7	5	10	45	149	2		Fern	FERN_77		Nephrolepis cordifolia	Nephrolepidaceae	Valid	6.5	160						false	0	vegetating	1				0		2	crown	Juvenile/Sapling	545		vegetating	65s-149/32	12	24	e15460f8-4c09-4a5a-95bc-70e5e721ba1e
2024751045149	2024751045149	2024	7	5	8	13	65s	2024	7	5	10	45	149	2		Fern	FERN_78		Nephrolepis cordifolia	Nephrolepidaceae	Valid	7	118						false	0	vegetating	12				0		2	crown	Adult	541			65s-149/33	12	25	c2a2f7e3-5e80-4dd3-ac0f-e30f4e49e94c
2024751045149	2024751045149	2024	7	5	8	13	65s	2024	7	5	10	45	149	1		Seed plant	MUS_397		Angraecum pectinatum	orchidaceae	Valid	4.8	350						false	0	vegetating	6	0	0				1	main trunk	Adult	546	At the fork	vegetating	65s-149/34	12	33	a99a3824-f771-4867-84dc-dd36be49d767
2024751045149	2024751045149	2024	7	5	8	13	65s	2024	7	5	10	45	149	1		Seed plant	MUS_397		Angraecum pectinatum	orchidaceae	Valid	5.2	60						false	3	unripe fruit	12	0	0				2	crown	Adult	548		fruiting	65s-149/35	12	34	4928fb3c-0227-4e2d-a8c8-71222e2344ce
2024751045149	2024751045149	2024	7	5	8	13	65s	2024	7	5	10	45	149	1		Seed plant	MUS_397		Angraecum pectinatum	orchidaceae	Valid	6	40						false	0	vegetating	18	0	0				2	crown	Adult	548		vegetating	65s-149/36	12	36	0e050930-f40e-411b-bb90-bca3b18039c5
2024751045149	2024751045149	2024	7	5	8	13	65s	2024	7	5	10	45	149	1		Seed plant	zz		Angraecum mauritianum	orchidaceae	Valid	7	40						false	0	vegetating	6	0	0				2	crown	Adult	551-553		vegetating	65s-149/37	12	38	9f07b809-dfaf-4d64-be12-7b062d1f749e
2024751045149	2024751045149	2024	7	5	8	13	65s	2024	7	5	10	45	149	1		Seed plant	MUS_400		Angraecum mauritianum	orchidaceae	Valid	8	40						false	0	vegetating		0	0				2	crown	Adult	554-558		vegetating	65s-149/38	12	41	04d680ea-1a38-4bc3-b85c-cf63f96ab552
2024751045149	2024751045149	2024	7	5	8	13	65s	2024	7	5	10	45	149	2		Fern	FERN_78		Nephrolepis cordifolia	Nephrolepidaceae	Valid	8	104						false	0	vegetating	3				0		2	crown	Adult	559		vegetating	65s-149/39	12	43	e915966b-dc97-4586-b5aa-b2637c997472
2024751045149	2024751045149	2024	7	5	8	13	65s	2024	7	5	10	45	149	1		Seed plant	INV_75		Cnestis polyphylla	Connaraceae	Valid	8							false	0	vegetating							2	crown	Adult	560-562		vegetating	65s-149/40	12	45	1630cc40-c92c-442f-bba3-f988ac6480c4
2024751045149	2024751045149	2024	7	5	8	13	65s	2024	7	5	10	45	149	1		Seed plant	MUS_400		Angraecum mauritianum	orchidaceae	Valid	5.5	36						false	0	vegetating	3	0	0				2	crown	Juvenile/Sapling	563		vegetating	65s-149/41	12	54	f4fab33b-45fa-43c0-854d-362f527b9032
2024751045149	2024751045149	2024	7	5	8	13	65s	2024	7	5	10	45	149	1		Seed plant	MUS_397		Angraecum pectinatum	orchidaceae	Valid	7	36						false	0	vegetating	15	0	0				2	crown	Adult	564		vegetating	65s-149/42	12	56	feca84a5-c06a-405c-82e0-72bcb7f00375
2024751045149	2024751045149	2024	7	5	8	13	65s	2024	7	5	10	45	149	1		Seed plant	MUS_397		Angraecum pectinatum	orchidaceae	Valid	7.3	36						false	3	unripe fruit		0	1				2	crown	Adult	566		fruiting	65s-149/43	12	57	7b833db4-2f30-48f3-af8e-12ae71d85935
2024751045149	2024751045149	2024	7	5	8	13	65s	2024	7	5	10	45	149	1		Seed plant	MUS_397		Angraecum pectinatum	orchidaceae	Valid	7.4	280						false	0	vegetating	6	0	0				2	crown	Juvenile/Sapling	567		vegetating	65s-149/44	12	59	45b7059c-24da-4447-b8f7-30f5efcfa1c0
2024751045149	2024751045149	2024	7	5	8	13	65s	2024	7	5	10	45	149	1		Seed plant	MUS_397		Angraecum pectinatum	orchidaceae	Valid	7.6	60						false	0	vegetating	7	0	0				2	crown	Subadult	568		vegetating	65s-149/45	13	1	31c46995-8300-41a2-9be9-1ff8fd2c1b9f
2024751045149	2024751045149	2024	7	5	8	13	65s	2024	7	5	10	45	149	1		Seed plant	MUS_397		Angraecum pectinatum	orchidaceae	Valid	8	60						false	0	vegetating		0	0				2	crown	Adult	569		vegetating	65s-149/46	13	3	4e965280-6a88-4348-8a46-4afc88d7a445
2024751045149	2024751045149	2024	7	5	8	13	65s	2024	7	5	10	45	149	1		Seed plant	MUS_397		Angraecum pectinatum	orchidaceae	Valid	8.2	60						false	0	vegetating	28	0	0				2	crown	Adult	570		vegetating	65s-149/47	13	4	2c4b16ac-6918-4a18-9783-2cbd546c38b7
2024751045149	2024751045149	2024	7	5	8	13	65s	2024	7	5	10	45	149	1		Seed plant	MUS_397		Angraecum pectinatum	orchidaceae	Valid	8.2	60						false	0	vegetating	7	0	0				2	crown	Subadult	570		vegetating	65s-149/48	13	6	dace1a50-6bcc-4c26-bfd6-ccad1f13e136
2024751045149	2024751045149	2024	7	5	8	13	65s	2024	7	5	10	45	149	1		Seed plant	MUS_397		Angraecum pectinatum	orchidaceae	Valid	8.4	60						false	0	vegetating	8	0	0				2	crown	Juvenile/Sapling	572		vegetating	65s-149/49	13	8	988c505f-c7dc-4ad9-861d-d3351834930d
2024751045149	2024751045149	2024	7	5	8	13	65s	2024	7	5	10	45	149	1		Seed plant	MUS_397		Angraecum pectinatum	orchidaceae	Valid	8.4	60						false	0	vegetating	4	0	0				2	crown	Juvenile/Sapling	572		vegetating	65s-149/50	13	9	2c8af5fb-d768-46a4-9114-2995ef5b6988
2024751045149	2024751045149	2024	7	5	8	13	65s	2024	7	5	10	45	149	1		Seed plant	MUS_397		Angraecum pectinatum	orchidaceae	Valid	8.5	60						false	0	vegetating		0	0				2	crown	Adult	573		vegetating	65s-149/51	13	10	3b30e2ea-dcf2-4f59-a335-595a8457cd91
2024751045149	2024751045149	2024	7	5	8	13	65s	2024	7	5	10	45	149	1		Seed plant	MUS_400		Angraecum mauritianum	orchidaceae	Valid	9	350						false	0	vegetating	8	0	0				2	crown	Adult	574-575		vegetating	65s-149/52	13	11	1a30b00b-5fcb-4a6d-a3a3-7efe949c7f2e
2024751045149	2024751045149	2024	7	5	8	13	65s	2024	7	5	10	45	149	1		Seed plant	MUS_397		Angraecum pectinatum	orchidaceae	Valid	9	350						false	0	vegetating		0	0				2	crown	Adult	575		vegetating	65s-149/53	13	14	a2abff49-110e-4001-b25d-d9668a44538b
2024751045149	2024751045149	2024	7	5	8	13	65s	2024	7	5	10	45	149	1		Seed plant	zz		Angraecum sp.	orchidaceae	Valid	9.2	20						false	0	dry/fallen fruit	4	0	0				2	crown	Adult	576-577		vegetating	65s-149/54	13	15	6d1c4619-9c1f-4a69-8e11-e78c7af7b1c6
2024751045149	2024751045149	2024	7	5	8	13	65s	2024	7	5	10	45	149	1		Seed plant	MUS_397		Angraecum pectinatum	orchidaceae	Valid	9	10						false	0	vegetating	11	0	0				2	crown	Adult	579		vegetating	65s-149/55	13	17	d51d1e33-ca71-47b3-a60d-0299ae2bf67b
2024751415150	2024751415150	2024	7	5	8	13	65s	2024	7	5	14	15	150	2		Fern	FERN_121		Microsorum punctatum	Polypodiaceae	Valid	0.9	294	50	96	51	61	8.5	false	0	vegetating	14				0		1	main trunk	Adult			vegetating	65s-150/1	14	26	16c2cb23-d530-4aba-a2c1-e5307fcee2d6
2024751415150	2024751415150	2024	7	5	8	13	65s	2024	7	5	14	15	150	2		Fern	FERN_78		Nephrolepis cordifolia	Nephrolepidaceae	Valid	2.4	180						false	0	vegetating	3				0		1	main trunk	Adult	103-580		vegetating	65s-150/1	8	52	7eefe936-e21b-49d9-8d27-c722bb29685f
2024751415150	2024751415150	2024	7	5	8	13	65s	2024	7	5	14	15	150	2		Fern	FERN_173		Microsorum punctatum	Polypodiaceae	Valid	2.6	2,6						false	0	vegetating	4				0		1	main trunk	Juvenile/Sapling	582		vegetating	65s-150/2	9	0	b2631d80-8257-471b-b263-61e812119a6d
2024751415150	2024751415150	2024	7	5	8	13	65s	2024	7	5	14	15	150	2		Fern	FERN_173		Microsorum punctatum	Polypodiaceae	Valid	2.6	190						false	0	vegetating	3				0		1	main trunk	Juvenile/Sapling	583			65s-150/	9	1	dc2d63e4-23d6-44f7-b695-328b84b82bfc
2024751415150	2024751415150	2024	7	5	8	13	65s	2024	7	5	14	15	150	2		Fern	FERN_173		Microsorum punctatum	Polypodiaceae	Valid	2.8	190						false	0	vegetating	2				0		1	main trunk	Juvenile/Sapling	583		vegetating	65s-150/3	9	2	befdda7b-5237-4944-9ec6-b9d3a0444e36
2024751415150	2024751415150	2024	7	5	8	13	65s	2024	7	5	14	15	150	2		Fern	FERN_173		Microsorum punctatum	Polypodiaceae	Valid	2.8	190						false	0	vegetating	1				0		1	main trunk	Juvenile/Sapling	583		vegetating	65s-150/8	9	3	f88bb7f7-37c4-4f19-b896-63bf54dd9157
2024751415150	2024751415150	2024	7	5	8	13	65s	2024	7	5	14	15	150	2		Fern	FERN_173		Microsorum punctatum	Polypodiaceae	Valid	3.1	190						false	0	vegetating	1				0		1	main trunk	Juvenile/Sapling			vegetating	65s-150/9	9	4	d70f981c-795f-4413-9fe1-7d0399f0f93e
2024751415150	2024751415150	2024	7	5	8	13	65s	2024	7	5	14	15	150	2		Fern	FERN_173		Microsorum punctatum	Polypodiaceae	Valid	3.1	190						false	0	vegetating	2				0		1	main trunk	Juvenile/Sapling			vegetating	65s-150/10	9	5	1d474f18-1edb-49dc-8846-f210ec440b3e
2024751415150	2024751415150	2024	7	5	8	13	65s	2024	7	5	14	15	150	2		Fern	FERN_78		Nephrolepis cordifolia	Nephrolepidaceae	Valid	3.4	190						false	0	vegetating	2				0		1	main trunk	Subadult			vegetating	65s-150/11	9	6	51d82634-e391-443d-b353-03193489c3f4
2024751415150	2024751415150	2024	7	5	8	13	65s	2024	7	5	14	15	150	2		Fern	FERN_173		Microsorum punctatum	Polypodiaceae	Valid	3.6	180						false	0	vegetating	3						1	main trunk				vegetating	65s-150/12	9	7	59c46629-4686-4380-918f-51a0debed63d
2024751415150	2024751415150	2024	7	5	8	13	65s	2024	7	5	14	15	150	2		Fern	FERN_173		Microsorum punctatum	Polypodiaceae	Valid	3.8	180						false	0	vegetating	4						1	main trunk	Adult			vegetating	65s-150/13	9	8	bc1b28b9-24b3-4a7d-a4a4-f9d715f86361
2024751415150	2024751415150	2024	7	5	8	13	65s	2024	7	5	14	15	150	2		Fern	FERN_78		Nephrolepis cordifolia	Nephrolepidaceae	Valid	4	180						false	0	vegetating	4						1	main trunk	Adult			vegetating	65s-150/14	9	8	d62407eb-04c5-4b62-bc8f-de8f1eee096a
2024751415150	2024751415150	2024	7	5	8	13	65s	2024	7	5	14	15	150	2		Fern	FERN_173		Microsorum punctatum	Polypodiaceae	Valid	4	180						false	0	vegetating	4				0		1	main trunk	Adult			vegetating	65s-150/15	9	9	6ec5ba28-fc66-4a0e-ac92-f6325672017d
2024751415150	2024751415150	2024	7	5	8	13	65s	2024	7	5	14	15	150	2		Fern	FERN_173		Microsorum punctatum	Polypodiaceae	Valid	4.4	180						false	0	vegetating					0		1	main trunk				vegetating	65s-150/16	9	11	9bc9ddca-f72c-4f64-afd2-7c54ea067903
2024751415150	2024751415150	2024	7	5	8	13	65s	2024	7	5	14	15	150	2		Fern	FERN_173		Microsorum punctatum	Polypodiaceae	Valid	4.4	180						false	0	vegetating					0		1	main trunk				vegetating	65s-150/16b	9	11	9bc9ddca-f72c-4f64-afd2-7c54ea067904
2024751415150	2024751415150	2024	7	5	8	13	65s	2024	7	5	14	15	150	2		Fern	FERN_173		Microsorum punctatum	Polypodiaceae	Valid	4.4	180						false	0	vegetating					0		1	main trunk				vegetating	65s-150/16c	9	11	9bc9ddca-f72c-4f64-afd2-7c54ea067905
2024751415150	2024751415150	2024	7	5	8	13	65s	2024	7	5	14	15	150	2		Fern	FERN_78		Nephrolepis cordifolia	Nephrolepidaceae	Valid	4.6	180						false	0	vegetating	6				0		1	main trunk	Adult			vegetating	65s-150/17	9	12	d229bf05-0a2b-49ae-80c2-e21001a365e8
2024751415150	2024751415150	2024	7	5	8	13	65s	2024	7	5	14	15	150	2		Fern	FERN_78		Nephrolepis cordifolia	Nephrolepidaceae	Valid	4.4	180						false	0	vegetating	6				0		1	main trunk	Adult			vegetating	65s-150/18	9	13	8139b80b-b4be-422f-94e8-35071e45ab3a
2024751415150	2024751415150	2024	7	5	8	13	65s	2024	7	5	14	15	150	2		Fern	FERN_173		Microsorum punctatum	Polypodiaceae	Valid	4.6	180						false	0	vegetating							1	main trunk	Adult			vegetating	65s-150/19	9	14	fb47b814-0f3f-4bc5-8fc2-0e4ebddc36d7
2024751415150	2024751415150	2024	7	5	8	13	65s	2024	7	5	14	15	150	2		Fern	FERN_173		Microsorum punctatum	Polypodiaceae	Valid	5	180						false	0	vegetating					0		1	main trunk	Adult			vegetating	65s-150/20	9	14	1fce00bc-1e86-413b-8b8b-6c0f8bf0e50d
2024751415150	2024751415150	2024	7	5	8	13	65s	2024	7	5	14	15	150	2		Fern	FERN_78		Nephrolepis cordifolia	Nephrolepidaceae	Valid	5.5	180						false	0	vegetating	10						1	main trunk	Adult			vegetating	65s-150/21	9	15	adde99aa-f060-45aa-9bf1-1359e472c3d9
2024751415150	2024751415150	2024	7	5	8	13	65s	2024	7	5	14	15	150	2		Fern	FERN_78		Nephrolepis cordifolia	Nephrolepidaceae	Valid	5.5	180						false	0	vegetating	10						1	main trunk	Adult			vegetating	65s-150/21b	9	15	adde99aa-f060-45aa-9bf1-1359e472c3d91
2024751415150	2024751415150	2024	7	5	8	13	65s	2024	7	5	14	15	150	2		Fern	FERN_78		Nephrolepis cordifolia	Nephrolepidaceae	Valid	5.5	180						false	0	vegetating	10						1	main trunk	Adult			vegetating	65s-150/21c	9	15	adde99aa-f060-45aa-9bf1-1359e472c3d92
2024751415150	2024751415150	2024	7	5	8	13	65s	2024	7	5	14	15	150	2		Fern	FERN_173		Microsorum punctatum	Polypodiaceae	Valid	5.6	180						false	0	vegetating							1	main trunk	Subadult			vegetating	65s-150/22	9	16	a252c57a-bcda-4c08-a00b-b1a5c16ed826
2024751415150	2024751415150	2024	7	5	8	13	65s	2024	7	5	14	15	150	2		Fern	FERN_173		Microsorum punctatum	Polypodiaceae	Valid	5.6	180						false	0	vegetating							1	main trunk	Subadult			vegetating	65s-150/22b	9	16	a252c57a-bcda-4c08-a00b-b1a5c16ed8261
2024751415150	2024751415150	2024	7	5	8	13	65s	2024	7	5	14	15	150	2		Fern	FERN_78		Nephrolepis cordifolia	Nephrolepidaceae	Valid	6																1	main trunk					65s-150/23	9	18	44f3fae7-66e2-4c7b-b1c8-34b174047339
2024751415150	2024751415150	2024	7	5	8	13	65s	2024	7	5	14	15	150	2		Fern	FERN_78		Nephrolepis cordifolia	Nephrolepidaceae	Valid	6																1	main trunk					65s-150/23b	9	18	44f3fae7-66e2-4c7b-b1c8-34b1740473391
2024751415150	2024751415150	2024	7	5	8	13	65s	2024	7	5	14	15	150	2		Fern	FERN_78		Nephrolepis cordifolia	Nephrolepidaceae	Valid	6																1	main trunk					65s-150/23c	9	18	44f3fae7-66e2-4c7b-b1c8-34b1740473392
2024751415150	2024751415150	2024	7	5	8	13	65s	2024	7	5	14	15	150	2		Fern	FERN_173		Microsorum punctatum	Polypodiaceae	Valid	6.6							false	0	vegetating								crown	Subadult				65s-150/24	9	18	c00fdcb6-fd08-4e4b-9024-e3685410a3bf
2024751415150	2024751415150	2024	7	5	8	13	65s	2024	7	5	14	15	150	2		Fern	FERN_173		Microsorum punctatum	Polypodiaceae	Valid	6.6							false	0	vegetating								crown	Subadult				65s-150/24b	9	18	c00fdcb6-fd08-4e4b-9024-e3685410a3bf1
2024751415150	2024751415150	2024	7	5	8	13	65s	2024	7	5	14	15	150	2		Fern	FERN_78		Nephrolepis cordifolia	Nephrolepidaceae	Valid	6.6	180						false	0	vegetating							2	crown					65s-150/25c	9	19	c8ecf6d7-e362-4028-842a-1f686c7d1cfc2
2024751415150	2024751415150	2024	7	5	8	13	65s	2024	7	5	14	15	150	2		Fern	FERN_78		Nephrolepis cordifolia	Nephrolepidaceae	Valid	6.7	180						false	0	vegetating							2	crown					65s-150/25d	9	19	c8ecf6d7-e362-4028-842a-1f686c7d1cfc3
2024751415150	2024751415150	2024	7	5	8	13	65s	2024	7	5	14	15	150	2		Fern	FERN_78		Nephrolepis cordifolia	Nephrolepidaceae	Valid	6.8	180						false	0	vegetating							2	crown					65s-150/25e	9	19	c8ecf6d7-e362-4028-842a-1f686c7d1cfc4
2024751415150	2024751415150	2024	7	5	8	13	65s	2024	7	5	14	15	150	2		Fern	FERN_78		Nephrolepis cordifolia	Nephrolepidaceae	Valid	6.9	180						false	0	vegetating							2	crown					65s-150/25f	9	19	c8ecf6d7-e362-4028-842a-1f686c7d1cfc5
2024751415150	2024751415150	2024	7	5	8	13	65s	2024	7	5	14	15	150	2		Fern	FERN_78		Nephrolepis cordifolia	Nephrolepidaceae	Valid	7	180						false	0	vegetating							2	crown					65s-150/25g	9	19	c8ecf6d7-e362-4028-842a-1f686c7d1cfc6
2024751415150	2024751415150	2024	7	5	8	13	65s	2024	7	5	14	15	150	2		Fern	FERN_78		Nephrolepis cordifolia	Nephrolepidaceae	Valid	7.1	180						false	0	vegetating							2	crown					65s-150/25h	9	19	c8ecf6d7-e362-4028-842a-1f686c7d1cfc7
2024751415150	2024751415150	2024	7	5	8	13	65s	2024	7	5	14	15	150	2		Fern	FERN_78		Nephrolepis cordifolia	Nephrolepidaceae	Valid	7.2	180						false	0	vegetating							2	crown					65s-150/25i	9	19	c8ecf6d7-e362-4028-842a-1f686c7d1cfc8
2024751415150	2024751415150	2024	7	5	8	13	65s	2024	7	5	14	15	150	2		Fern	FERN_78		Nephrolepis cordifolia	Nephrolepidaceae	Valid	7.3	180						false	0	vegetating							2	crown					65s-150/25j	9	19	c8ecf6d7-e362-4028-842a-1f686c7d1cfc9
2024751415150	2024751415150	2024	7	5	8	13	65s	2024	7	5	14	15	150	2		Fern	FERN_78		Nephrolepis cordifolia	Nephrolepidaceae	Valid	7.4	180						false	0	vegetating							2	crown					65s-150/25k	9	19	c8ecf6d7-e362-4028-842a-1f686c7d1cfc10
2024751415150	2024751415150	2024	7	5	8	13	65s	2024	7	5	14	15	150	2		Fern	FERN_78		Nephrolepis cordifolia	Nephrolepidaceae	Valid	7.5	180						false	0	vegetating							2	crown					65s-150/25l	9	19	c8ecf6d7-e362-4028-842a-1f686c7d1cfc11
2024751415150	2024751415150	2024	7	5	8	13	65s	2024	7	5	14	15	150	1		Seed plant	MUS_397		Angraecum pectinatum	orchidaceae	Valid	8	190						false	0	vegetating	5	0	0				2	crown	Subadult			vegetating	65s-150/26	9	20	05786bff-8290-477a-9db1-2cc12601ed7b
2024751415150	2024751415150	2024	7	5	8	13	65s	2024	7	5	14	15	150	1		Seed plant	MUS_397		Angraecum pectinatum	orchidaceae	Valid	9	180						false	0	vegetating	5	0	0				2	crown	Adult			vegetating	65s-150/27	9	22	a03fb527-364a-4404-a212-53aa613ab857
2024751415150	2024751415150	2024	7	5	8	13	65s	2024	7	5	14	15	150	1		Seed plant	MUS_106		Cnestis polyphylla	Connaraceae	Valid	10							false									2	crown	Adult			vegetating	65s-150/28	9	23	a595f922-1c52-48ce-9d06-a055f8330d0b
2024751415150	2024751415150	2024	7	5	8	13	65s	2024	7	5	14	15	150	1		Seed plant	MUS_460		Polystachia mauritiana s.l.	orchidaceae	Valid	8	180						false	3	unripe fruit	14	0	15				2	crown	Adult	585		fruiting	65s-150/29	9	24	a48001b6-a8c8-499b-9bb5-4b47f9f24902
2024751415150	2024751415150	2024	7	5	8	13	65s	2024	7	5	14	15	150	2		Fern	FERN_78		Nephrolepis cordifolia	Nephrolepidaceae	Valid	8	180						false	0	vegetating	3						2	crown	Adult			vegetating	65s-150/30	9	29	716064e9-4ded-4646-a93a-278fbe07ddec
2024751415150	2024751415150	2024	7	5	8	13	65s	2024	7	5	14	15	150	2		Fern	FERN_78		Nephrolepis cordifolia	Nephrolepidaceae	Valid	8	180						false	0	vegetating	3						2	crown	Adult			vegetating	65s-150/30b	9	29	716064e9-4ded-4646-a93a-278fbe07ddec1
2024751415150	2024751415150	2024	7	5	8	13	65s	2024	7	5	14	15	150	1		Seed plant	MUS_397		Angraecum pectinatum	orchidaceae	Valid	9	190						false		vegetating							2	crown				vegetating	65s-150/31	9	30	8a96862d-07c1-427f-8d5b-c3325302cdc0
2024751415150	2024751415150	2024	7	5	8	13	65s	2024	7	5	14	15	150	1		Seed plant	MUS_397		Angraecum pectinatum	orchidaceae	Valid	9	190						false		vegetating							2	crown				vegetating	65s-150/31b	9	30	8a96862d-07c1-427f-8d5b-c3325302cdc01
2024751415150	2024751415150	2024	7	5	8	13	65s	2024	7	5	14	15	150	1		Seed plant	MUS_397		Angraecum pectinatum	orchidaceae	Valid	9	190						false		vegetating							2	crown				vegetating	65s-150/31c	9	30	8a96862d-07c1-427f-8d5b-c3325302cdc02
2024751415150	2024751415150	2024	7	5	8	13	65s	2024	7	5	14	15	150	2		Fern	FERN_78		Nephrolepis cordifolia	Nephrolepidaceae	Valid	9	190						false	0	vegetating							2	crown				vegetating	65s-150/32	9	32	b121da3c-67ce-4bd2-afc0-493cefab04ed
2024751415150	2024751415150	2024	7	5	8	13	65s	2024	7	5	14	15	150	1		Seed plant	MUS_397		Angraecum pectinatum	orchidaceae	Valid	2.6	220						false		vegetating	13						1	main trunk	Adult	586			65s-150/33	9	32	f7e555ce-9328-4d3d-861b-1ae2865a2362
2024751415150	2024751415150	2024	7	5	8	13	65s	2024	7	5	14	15	150	1		Seed plant	MUS_397		Angraecum pectinatum	orchidaceae	Valid	2.6	220						false		vegetating							1	main trunk	Adult	586			65s-150/33b	9	32	f7e555ce-9328-4d3d-861b-1ae2865a23621
2024751415150	2024751415150	2024	7	5	8	13	65s	2024	7	5	14	15	150	1		Seed plant	MUS_397		Angraecum pectinatum	orchidaceae	Valid	2.8	220						false		vegetating							1	main trunk	Adult	586			65s-150/33c	9	32	f7e555ce-9328-4d3d-861b-1ae2865a23622
2024751415150	2024751415150	2024	7	5	8	13	65s	2024	7	5	14	15	150	1		Seed plant	MUS_397		Angraecum pectinatum	orchidaceae	Valid	2.8	220						false		vegetating							1	main trunk	Adult	586			65s-150/33d	9	32	f7e555ce-9328-4d3d-861b-1ae2865a23623
2024751415150	2024751415150	2024	7	5	8	13	65s	2024	7	5	14	15	150	1		Seed plant	MUS_397		Angraecum pectinatum	orchidaceae	Valid	2.9	200						false		vegetating	16						1	main trunk	Adult	587			65s-150/34	9	36	bbfe2cee-11a7-401c-a40b-e0622f15676e
2024751415150	2024751415150	2024	7	5	8	13	65s	2024	7	5	14	15	150	1		Seed plant	MUS_397		Angraecum pectinatum	orchidaceae	Valid	2.9	200						false		vegetating							1	main trunk	Adult	587			65s-150/34b	9	36	bbfe2cee-11a7-401c-a40b-e0622f15676e1
2024751415150	2024751415150	2024	7	5	8	13	65s	2024	7	5	14	15	150	1		Seed plant	MUS_397		Angraecum pectinatum	orchidaceae	Valid	3	200						false		vegetating							1	main trunk	Adult	587			65s-150/34c	9	36	bbfe2cee-11a7-401c-a40b-e0622f15676e2
2024751415150	2024751415150	2024	7	5	8	13	65s	2024	7	5	14	15	150	1		Seed plant	MUS_397		Angraecum pectinatum	orchidaceae	Valid	3.1	230						false		vegetating							1	main trunk	Adult	587			65s-150/35	9	37	b3117acd-4354-47e0-8241-e4e4e433fc54
2024751415150	2024751415150	2024	7	5	8	13	65s	2024	7	5	14	15	150	1		Seed plant	MUS_397		Angraecum pectinatum	orchidaceae	Valid	3.3	200						false		vegetating	7						1	main trunk	Juvenile/Sapling	588			65s-150/36	9	38	289d5464-8d52-4de2-b643-3c74e30bbba0
2024751415150	2024751415150	2024	7	5	8	13	65s	2024	7	5	14	15	150	1		Seed plant	MUS_397		Angraecum pectinatum	orchidaceae	Valid	3.3	200						false		vegetating							1	main trunk	Adult	588			65s-150/37	9	39	fdf4a584-9963-4ccc-940e-68798c3e69be
2024751415150	2024751415150	2024	7	5	8	13	65s	2024	7	5	14	15	150	1		Seed plant	MUS_397		Angraecum pectinatum	orchidaceae	Valid	3.5	210								vegetating							1	main trunk	Adult	588			65s-150/38	9	40	773aa10b-8078-484a-a800-0ac78090ad86
2024751415150	2024751415150	2024	7	5	8	13	65s	2024	7	5	14	15	150	2		Fern	FERN_78		Nephrolepis cordifolia	Nephrolepidaceae	Valid	3.6	200						false	0	vegetating	2						1	main trunk	Subadult			vegetating	65s-150/39	9	41	6450413f-dee0-4967-8ff3-3ee6e7b9f004
2024751415150	2024751415150	2024	7	5	8	13	65s	2024	7	5	14	15	150	2		Fern	FERN_173		Microsorum punctatum	Polypodiaceae	Valid	3.7	34						false	0	vegetating	4				0		1	main trunk				vegetating	65s-150/40	9	41	f8b9f53a-b017-4b76-88dc-437b86193537
2024751415150	2024751415150	2024	7	5	8	13	65s	2024	7	5	14	15	150	2		Fern	FERN_78		Nephrolepis cordifolia	Nephrolepidaceae	Valid	3.9	From 40 to 150						false	0	vegetating							1	main trunk	Juvenile/Sapling	589			65s-150/41	9	43	936521a9-a56c-4137-a526-c82aa4d6301c
2024751415150	2024751415150	2024	7	5	8	13	65s	2024	7	5	14	15	150	2		Fern	FERN_78		Nephrolepis cordifolia	Nephrolepidaceae	Valid	3.9	From 40 to 150						false	0	vegetating							1	main trunk	Subadult	589			65s-150/41b	9	43	936521a9-a56c-4137-a526-c82aa4d6301c1
2024751415150	2024751415150	2024	7	5	8	13	65s	2024	7	5	14	15	150	2		Fern	FERN_78		Nephrolepis cordifolia	Nephrolepidaceae	Valid	3.9	From 40 to 150						false	0	vegetating							1	main trunk	Subadult	589			65s-150/41c	9	43	936521a9-a56c-4137-a526-c82aa4d6301c2
2024751415150	2024751415150	2024	7	5	8	13	65s	2024	7	5	14	15	150	2		Fern	FERN_78		Nephrolepis cordifolia	Nephrolepidaceae	Valid	4	190						false	0	vegetating	8						1	main trunk	Adult			vegetating	65s-150/42	9	45	f8a970ef-1632-4b06-8a8c-f507a20f4321
2024751415150	2024751415150	2024	7	5	8	13	65s	2024	7	5	14	15	150	2		Fern	FERN_173		Microsorum punctatum	Polypodiaceae	Valid	4	190						false	0	vegetating	20				0		1	main trunk	Adult			vegetating	65s-150/43	9	46	50cb2d4e-5e1b-4d5b-8eee-c5eb8e6fb267
2024751415150	2024751415150	2024	7	5	8	13	65s	2024	7	5	14	15	150	1		Seed plant	MUS_106		Cnestis polyphylla	Connaraceae	Valid	4.8	180						false									1	main trunk	Adult			vegetating	65s-150/44	9	46	fe881dfd-8581-42f2-a166-4a54921d4a3f
2024751415150	2024751415150	2024	7	5	8	13	65s	2024	7	5	14	15	150	1		Seed plant	MUS_397		Angraecum pectinatum	orchidaceae	Valid	5	190						false		vegetating							1	main trunk	Adult	591			65s-150/45	9	48	6bc2d619-ef7a-4084-ba1c-d688a38152be
2024751415150	2024751415150	2024	7	5	8	13	65s	2024	7	5	14	15	150	1		Seed plant	MUS_397		Angraecum pectinatum	orchidaceae	Valid	5	190						false		vegetating							1	main trunk	Adult	591			65s-150/45b	9	48	6bc2d619-ef7a-4084-ba1c-d688a38152be1
2024751415150	2024751415150	2024	7	5	8	13	65s	2024	7	5	14	15	150	1		Seed plant	MUS_397		Angraecum pectinatum	orchidaceae	Valid	5	190						false		vegetating							1	main trunk	Adult	591			65s-150/45c	9	48	6bc2d619-ef7a-4084-ba1c-d688a38152be2
2024751415150	2024751415150	2024	7	5	8	13	65s	2024	7	5	14	15	150	1		Seed plant	MUS_397		Angraecum pectinatum	orchidaceae	Valid	5	190						false		vegetating							1	main trunk	Adult	591			65s-150/45d	9	48	6bc2d619-ef7a-4084-ba1c-d688a38152be3
2024751415150	2024751415150	2024	7	5	8	13	65s	2024	7	5	14	15	150	1		Seed plant	MUS_397		Angraecum pectinatum	orchidaceae	Valid	5	190						false		vegetating							1	main trunk	Adult	591			65s-150/45e	9	48	6bc2d619-ef7a-4084-ba1c-d688a38152be4
2024751415150	2024751415150	2024	7	5	8	13	65s	2024	7	5	14	15	150	1		Seed plant	MUS_397		Angraecum pectinatum	orchidaceae	Valid	5	190						false		vegetating							1	main trunk	Adult	591			65s-150/45f	9	48	6bc2d619-ef7a-4084-ba1c-d688a38152be5
2024751415150	2024751415150	2024	7	5	8	13	65s	2024	7	5	14	15	150	1		Seed plant	MUS_397		Angraecum pectinatum	orchidaceae	Valid	5.5	190						false		vegetating							1	main trunk	Adult	594			65s-150/46	9	49	93992784-c69e-43cb-a5f0-7b86798370ab
2024751415150	2024751415150	2024	7	5	8	13	65s	2024	7	5	14	15	150	1		Seed plant	MUS_397		Angraecum pectinatum	orchidaceae	Valid	5.6	190						false		vegetating							1	main trunk	Juvenile/Sapling	594			65s-150/46b	9	49	93992784-c69e-43cb-a5f0-7b86798370ab1
2024751415150	2024751415150	2024	7	5	8	13	65s	2024	7	5	14	15	150	1		Seed plant	MUS_397		Angraecum pectinatum	orchidaceae	Valid	5.8	190						false		vegetating							1	main trunk	Juvenile/Sapling	594			65s-150/46c	9	49	93992784-c69e-43cb-a5f0-7b86798370ab2
2024751415150	2024751415150	2024	7	5	8	13	65s	2024	7	5	14	15	150	1		Seed plant	MUS_397		Angraecum pectinatum	orchidaceae	Valid	5.8	190						false		vegetating							1	main trunk	Juvenile/Sapling	594			65s-150/46d	9	49	93992784-c69e-43cb-a5f0-7b86798370ab3
2024751415150	2024751415150	2024	7	5	8	13	65s	2024	7	5	14	15	150	1		Seed plant	MUS_397		Angraecum pectinatum	orchidaceae	Valid	5.8	190						false		vegetating							1	main trunk	Juvenile/Sapling	594			65s-150/46e	9	49	93992784-c69e-43cb-a5f0-7b86798370ab4
2024751415150	2024751415150	2024	7	5	8	13	65s	2024	7	5	14	15	150	1		Seed plant	MUS_397		Angraecum pectinatum	orchidaceae	Valid	5.8	190						false		unripe fruit			1				1	main trunk	Adult	594			65s-150/46f	9	49	93992784-c69e-43cb-a5f0-7b86798370ab5
2024751415150	2024751415150	2024	7	5	8	13	65s	2024	7	5	14	15	150	1		Seed plant	MUS_397		Angraecum pectinatum	orchidaceae	Valid	5.8	190						false		unripe fruit			1				1	main trunk	Adult	594			65s-150/46g	9	49	93992784-c69e-43cb-a5f0-7b86798370ab6
2024751415150	2024751415150	2024	7	5	8	13	65s	2024	7	5	14	15	150	1		Seed plant	MUS_397		Angraecum pectinatum	orchidaceae	Valid	5.8	190						false		vegetating							1	main trunk	Adult	594			65s-150/46h	9	49	93992784-c69e-43cb-a5f0-7b86798370ab7
2024751415150	2024751415150	2024	7	5	8	13	65s	2024	7	5	14	15	150	1		Seed plant	MUS_397		Angraecum pectinatum	orchidaceae	Valid	5.9	190						false		vegetating							1	main trunk	Juvenile/Sapling	594			65s-150/46i	9	49	93992784-c69e-43cb-a5f0-7b86798370ab8
2024751415150	2024751415150	2024	7	5	8	13	65s	2024	7	5	14	15	150	1		Seed plant	MUS_397		Angraecum pectinatum	orchidaceae	Valid	6.4	200						false		unripe fruit			1				1	main trunk	Adult	595			65s-150/47	9	51	a5a021f3-0f2b-4250-9581-06ae602610ad
2024751415150	2024751415150	2024	7	5	8	13	65s	2024	7	5	14	15	150	1		Seed plant	MUS_397		Angraecum pectinatum	orchidaceae	Valid	6.3	200						false		vegetating							1	main trunk	Adult	595			65s-150/47b	9	51	a5a021f3-0f2b-4250-9581-06ae602610ad
2024751415150	2024751415150	2024	7	5	8	13	65s	2024	7	5	14	15	150	1		Seed plant	MUS_397		Angraecum pectinatum	orchidaceae	Valid	6.3	200						false		vegetating	16						1	main trunk	Adult	595			65s-150/47c	9	51	a5a021f3-0f2b-4250-9581-06ae602610ad
2024751415150	2024751415150	2024	7	5	8	13	65s	2024	7	5	14	15	150	1		Seed plant	MUS_397		Angraecum pectinatum	orchidaceae	Valid	6.4	200						false		vegetating	4						1	main trunk	Juvenile/Sapling	595			65s-150/47d	9	51	a5a021f3-0f2b-4250-9581-06ae602610ad
2024751415150	2024751415150	2024	7	5	8	13	65s	2024	7	5	14	15	150	1		Seed plant	MUS_397		Angraecum pectinatum	orchidaceae	Valid	6.4	200						false		vegetating	9						1	main trunk	Subadult	595			65s-150/47e	9	51	a5a021f3-0f2b-4250-9581-06ae602610ad
2024751415150	2024751415150	2024	7	5	8	13	65s	2024	7	5	14	15	150	1		Seed plant	MUS_397		Angraecum pectinatum	orchidaceae	Valid	6.4	200						false		vegetating	24						1	main trunk	Adult	595			65s-150/47f	9	51	a5a021f3-0f2b-4250-9581-06ae602610ad
2024751415150	2024751415150	2024	7	5	8	13	65s	2024	7	5	14	15	150	2		Fern	FERN_78		Nephrolepis cordifolia	Nephrolepidaceae	Valid	6.3	180						false		vegetating	1						1	main trunk	Juvenile/Sapling	595			65s-150/48	9	52	838fad27-03be-4c4e-b712-98e0f60a0504
2024751415150	2024751415150	2024	7	5	8	13	65s	2024	7	5	14	15	150	2		Fern	FERN_78		Nephrolepis cordifolia	Nephrolepidaceae	Valid	6.3	180						false		vegetating	2						1	main trunk	Subadult	595			65s-150/48b	9	52	838fad27-03be-4c4e-b712-98e0f60a0504
2024751415150	2024751415150	2024	7	5	8	13	65s	2024	7	5	14	15	150	1		Seed plant	MUS_397		Angraecum pectinatum	orchidaceae	Valid	7	200								vegetating							1	main trunk					65s-150/49	9	53	a93bb603-7c2f-408f-a061-69565c870416
2024751415150	2024751415150	2024	7	5	8	13	65s	2024	7	5	14	15	150	1		Seed plant	MUS_397		Angraecum pectinatum	orchidaceae	Valid	7	200								vegetating							1	main trunk					65s-150/49b	9	53	a93bb603-7c2f-408f-a061-69565c870417
2024751415150	2024751415150	2024	7	5	8	13	65s	2024	7	5	14	15	150	1		Seed plant	MUS_397		Angraecum pectinatum	orchidaceae	Valid	6.5	35						false		vegetating	2						1	main trunk	Juvenile/Sapling	596			65s-150/50	9	53	9d0e5449-843c-4cb0-b9e4-e1d8b3979a10
2024751415150	2024751415150	2024	7	5	8	13	65s	2024	7	5	14	15	150	1		Seed plant	MUS_397		Angraecum pectinatum	orchidaceae	Valid	6.5	35						false		vegetating	7						1	main trunk	Juvenile/Sapling	596			65s-150/50b	9	53	9d0e5449-843c-4cb0-b9e4-e1d8b3979a101
2024751415150	2024751415150	2024	7	5	8	13	65s	2024	7	5	14	15	150	1		Seed plant	MUS_397		Angraecum pectinatum	orchidaceae	Valid	6.5	35						false		vegetating	2						1	main trunk	Juvenile/Sapling	596			65s-150/50c	9	53	9d0e5449-843c-4cb0-b9e4-e1d8b3979a102
2024751415150	2024751415150	2024	7	5	8	13	65s	2024	7	5	14	15	150	1		Seed plant	MUS_397		Angraecum pectinatum	orchidaceae	Valid	6.5	35						false		vegetating	2						1	main trunk	Juvenile/Sapling	596			65s-150/50d	9	53	9d0e5449-843c-4cb0-b9e4-e1d8b3979a103
2024751415150	2024751415150	2024	7	5	8	13	65s	2024	7	5	14	15	150	1		Seed plant	MUS_397		Angraecum pectinatum	orchidaceae	Valid	6.5	35						false		vegetating	5						1	main trunk	Juvenile/Sapling	596			65s-150/50e	9	53	9d0e5449-843c-4cb0-b9e4-e1d8b3979a104
2024751415150	2024751415150	2024	7	5	8	13	65s	2024	7	5	14	15	150	1		Seed plant	MUS_397		Angraecum pectinatum	orchidaceae	Valid	6.8	35						false		vegetating	4						1	main trunk	Juvenile/Sapling	596			65s-150/50f	9	53	9d0e5449-843c-4cb0-b9e4-e1d8b3979a105
2024751415150	2024751415150	2024	7	5	8	13	65s	2024	7	5	14	15	150	2		Fern	FERN_78		Nephrolepis cordifolia	Nephrolepidaceae	Valid	4.5	40						false		vegetating	2						1	main trunk	Adult	597			65s-150/51	9	55	578d7b19-5422-4b4f-b386-36ebb93cc851
2024751415150	2024751415150	2024	7	5	8	13	65s	2024	7	5	14	15	150	2		Fern	FERN_78		Nephrolepis cordifolia	Nephrolepidaceae	Valid	4.5	40						false		vegetating	1						1	main trunk	Subadult	597			65s-150/51b	9	55	578d7b19-5422-4b4f-b386-36ebb93cc8511
2024751415150	2024751415150	2024	7	5	8	13	65s	2024	7	5	14	15	150	2		Fern	FERN_78		Nephrolepis cordifolia	Nephrolepidaceae	Valid	4.5	40						false		vegetating	1						1	main trunk	Subadult	597			65s-150/51c	9	55	578d7b19-5422-4b4f-b386-36ebb93cc8512
2024751415150	2024751415150	2024	7	5	8	13	65s	2024	7	5	14	15	150	2		Fern	FERN_78		Nephrolepis cordifolia	Nephrolepidaceae	Valid	4.5	40						false		vegetating	1						1	main trunk	Subadult	597			65s-150/51d	9	55	578d7b19-5422-4b4f-b386-36ebb93cc8513
2024751415150	2024751415150	2024	7	5	8	13	65s	2024	7	5	14	15	150	2		Fern	FERN_78		Nephrolepis cordifolia	Nephrolepidaceae	Valid	4.5	40						false		vegetating	2						1	main trunk	Adult	597			65s-150/51e	9	55	578d7b19-5422-4b4f-b386-36ebb93cc8514
2024751415150	2024751415150	2024	7	5	8	13	65s	2024	7	5	14	15	150	1		Seed plant	MUS_397		Angraecum pectinatum	orchidaceae	Valid	9	220						false		vegetating							1	main trunk	Adult	598	12		65s-150/52	9	57	da09e61a-af17-4c62-9ec6-cd41284445945
2024751415150	2024751415150	2024	7	5	8	13	65s	2024	7	5	14	15	150	1		Seed plant	MUS_397		Angraecum pectinatum	orchidaceae	Valid	9	220						false		vegetating							1	main trunk	Adult	598	12		65s-150/52b	9	57	da09e61a-af17-4c62-9ec6-cd412844459451
2024751415150	2024751415150	2024	7	5	8	13	65s	2024	7	5	14	15	150	1		Seed plant	MUS_397		Angraecum pectinatum	orchidaceae	Valid	9	220						false		vegetating							1	main trunk	Adult	598	12		65s-150/52c	9	57	da09e61a-af17-4c62-9ec6-cd412844459452
2024751415150	2024751415150	2024	7	5	8	13	65s	2024	7	5	14	15	150	1		Seed plant	MUS_397		Angraecum pectinatum	orchidaceae	Valid	9	220						false		vegetating							1	main trunk	Adult	598	12		65s-150/52d	9	57	da09e61a-af17-4c62-9ec6-cd412844459453
2024751415150	2024751415150	2024	7	5	8	13	65s	2024	7	5	14	15	150	1		Seed plant	MUS_397		Angraecum pectinatum	orchidaceae	Valid	9	220						false		vegetating							1	main trunk	Adult	598	12		65s-150/52e	9	57	da09e61a-af17-4c62-9ec6-cd412844459454
2024751415150	2024751415150	2024	7	5	8	13	65s	2024	7	5	14	15	150	1		Seed plant	MUS_397		Angraecum pectinatum	orchidaceae	Valid	9	220						false		vegetating							1	main trunk	Adult	598	12		65s-150/52f	9	57	da09e61a-af17-4c62-9ec6-cd412844459455
2024751415150	2024751415150	2024	7	5	8	13	65s	2024	7	5	14	15	150	1		Seed plant	MUS_397		Angraecum pectinatum	orchidaceae	Valid	9	220						false		vegetating							1	main trunk	Adult	598	12		65s-150/52g	9	57	da09e61a-af17-4c62-9ec6-cd412844459456
2024751415150	2024751415150	2024	7	5	8	13	65s	2024	7	5	14	15	150	1		Seed plant	MUS_397		Angraecum pectinatum	orchidaceae	Valid	9	220						false		vegetating							1	main trunk	Adult	598	12		65s-150/52h	9	57	da09e61a-af17-4c62-9ec6-cd412844459457
2024751415150	2024751415150	2024	7	5	8	13	65s	2024	7	5	14	15	150	1		Seed plant	MUS_397		Angraecum pectinatum	orchidaceae	Valid	9	220						false		vegetating							1	main trunk	Adult	598	12		65s-150/52i	9	57	da09e61a-af17-4c62-9ec6-cd412844459458
2024751415150	2024751415150	2024	7	5	8	13	65s	2024	7	5	14	15	150	1		Seed plant	MUS_397		Angraecum pectinatum	orchidaceae	Valid	9.5	220						false		vegetating							1	crown	Juvenile/Sapling	598	12		65s-150/52j	9	57	da09e61a-af17-4c62-9ec6-cd412844459459
2024751415150	2024751415150	2024	7	5	8	13	65s	2024	7	5	14	15	150	1		Seed plant	MUS_397		Angraecum pectinatum	orchidaceae	Valid	9.5	220						false		vegetating							1	crown	Juvenile/Sapling	598	12		65s-150/52k	9	57	da09e61a-af17-4c62-9ec6-cd4128444594510
2024751415150	2024751415150	2024	7	5	8	13	65s	2024	7	5	14	15	150	1		Seed plant	MUS_397		Angraecum pectinatum	orchidaceae	Valid	9.5	220						false		vegetating							1	crown	Adult	598	12		65s-150/52l	9	57	da09e61a-af17-4c62-9ec6-cd4128444594511
2024751415150	2024751415150	2024	7	5	8	13	65s	2024	7	5	14	15	150	1		Seed plant	MUS_392		Angraecum mauritianum	orchidaceae	Valid	9	40						false	0	vegetating	7	0	0				1	main trunk	Adult	599		vegetating	65s-150/53	9	59	945d3c23-20fd-4a2f-be8b-958c96189646
2024751415150	2024751415150	2024	7	5	8	13	65s	2024	7	5	14	15	150	1		Seed plant	MUS_392		Angraecum pectinatum	orchidaceae	Valid	9	40						false	0	vegetating		0	0				1	main trunk	Adult	599		vegetating	65s-150/53b	9	59	945d3c23-20fd-4a2f-be8b-958c961896461
2024751415150	2024751415150	2024	7	5	8	13	65s	2024	7	5	14	15	150	1		Seed plant	MUS_397		Angraecum pectinatum	orchidaceae	Valid	11	200						false	0	vegetating							2	crown	Adult	600		vegetating	65s-150/54	10	2	db2f00fb-95a2-4cf0-9bb8-af162d2cb310
2024711849152	2024711849152	2024	7	11	8	48	65s	2024	7	11	8	49	152	2		Fern	FERN_77		Nephrolepis biserrata	Nephrolepidaceae	Valid	0.3	120	11	17	13	17	5	false	0	vegetating	2				0	0.3	1	main trunk	Juvenile/Sapling			vegetating	65s-152/1	9	9	c0a6fd1c-23d9-42ce-a0b4-cdc9c65f2a43
2024711849152	2024711849152	2024	7	11	8	48	65s	2024	7	11	8	49	152	2		Fern	FERN_77		Nephrolepis biserrata	Nephrolepidaceae	Valid	0.6	120	29	25	22	38	8	false	0	vegetating	3				0	0.5	1	main trunk	Subadult			vegetating	65s-152/2	9	14	0b1589d8-f81c-4b94-9c80-c1d4179c19c1
2024711849152	2024711849152	2024	7	11	8	48	65s	2024	7	11	8	49	152	2		Fern	FERN_77		Nephrolepis biserrata	Nephrolepidaceae	Valid	0.85	120	11	14	13	16	4.5	false	0	vegetating	2				0	0.2	1	main trunk	Juvenile/Sapling			vegetating	65s-152/3	9	17	2a9a83fa-bfad-4f52-afc6-58521b0267e0
2024711849152	2024711849152	2024	7	11	8	48	65s	2024	7	11	8	49	152	2		Fern	FERN_77		Nephrolepis biserrata	Nephrolepidaceae	Valid	1.1	120	45	66	18	32	8	false	0	vegetating	3				0	0.6	1	main trunk	Adult			vegetating	65s-152/4	9	19	aef66f2f-2d8f-4444-a49d-01bb061ecc46
2024711849152	2024711849152	2024	7	11	8	48	65s	2024	7	11	8	49	152	2		Fern	FERN_77		Nephrolepis biserrata	Nephrolepidaceae	Valid	1.2	100	12	19	13	25	8	false	0	vegetating	2				0	0.3	1	main trunk	Subadult			vegetating	65s-152/5	9	22	895a0c4b-ebba-4640-9c5b-9d8b968b2530
2024711849152	2024711849152	2024	7	11	8	48	65s	2024	7	11	8	49	152	2		Fern	FERN_77		Nephrolepis biserrata	Nephrolepidaceae	Valid	1.3	110	26	17	17	49	10	false	0	vegetating	2				0	0.4	1	main trunk	Adult			vegetating	65s-152/6	9	25	49184bbd-cb87-4f7c-9624-7c6b6840830c
2024711849152	2024711849152	2024	7	11	8	48	65s	2024	7	11	8	49	152	2		Fern	FERN_77		Nephrolepis biserrata	Nephrolepidaceae	Valid	1.3	100	62	71	44	70	13	false	4	ripe fruit	8				3		1	main trunk	Adult			reproducing	65s-152/7	9	27	215684ed-b03d-4797-be31-b9ed9b261492
2024711849152	2024711849152	2024	7	11	8	48	65s	2024	7	11	8	49	152	2		Fern	FERN_77		Nephrolepis biserrata	Nephrolepidaceae	Valid	1.6	120	10	9	10	14	4	false	0	vegetating	2				0	0.2	1	main trunk	Juvenile/Sapling			vegetating	65s-152/8	9	33	5f600842-60ea-45b5-a4d4-91489daa9192
2024711849152	2024711849152	2024	7	11	8	48	65s	2024	7	11	8	49	152	2		Fern	FERN_77		Nephrolepis biserrata	Nephrolepidaceae	Valid	1.6	100	55	71	56	75	14	false	4	ripe fruit	6				5	2	1	main trunk	Adult			reproducing	65s-152/9	9	36	beaacc48-9b84-409f-ad15-151f0dcf161e
2024711849152	2024711849152	2024	7	11	8	48	65s	2024	7	11	8	49	152	2		Fern	FERN_77		Nephrolepis biserrata	Nephrolepidaceae	Valid	1.6	100	14	19	18	19	5	false	0	vegetating					0	0.2	1	main trunk	Juvenile/Sapling			vegetating	65s-152/10	9	40	d607460c-d43f-42b3-bf29-7b52570792dc
2024711849152	2024711849152	2024	7	11	8	48	65s	2024	7	11	8	49	152	2		Fern	FERN_78		Nephrolepis biserrata	Nephrolepidaceae	Valid	0.3	80	7	14	9	8	2.5	false	0	vegetating	2				0	0.1	1	main trunk	Juvenile/Sapling			vegetating	65s-152/11	9	44	ab8d13f8-d73a-4d7b-8300-c56ecfa65875
2024711849152	2024711849152	2024	7	11	8	48	65s	2024	7	11	8	49	152	2		Fern	FERN_77		Nephrolepis biserrata	Nephrolepidaceae	Valid	0.7	46	12	7	6	14.5	5	false	0	vegetating	1				0	0.1	1	main trunk	Juvenile/Sapling			vegetating	65s-152/12	9	47	ecbb936f-a8ee-4bb4-85f0-53a81258f4e5
2024711849152	2024711849152	2024	7	11	8	48	65s	2024	7	11	8	49	152	2		Fern	FERN_77		Nephrolepis biserrata	Nephrolepidaceae	Valid	0.7	20	42	53	44	54	12	false	4	ripe fruit	5				1	1	1	main trunk	Adult			reproducing	65s-152/14	9	52	26c18761-ea3a-4f4b-ac3a-8b23cf4944bf
2024711849152	2024711849152	2024	7	11	8	48	65s	2024	7	11	8	49	152	2		Fern	FERN_77		Nephrolepis biserrata	Nephrolepidaceae	Valid	0.7	314	25	44	44	48	11	false	0	vegetating	5				0	0.6	1	main trunk	Adult			vegetating	65s-152/17	9	59	96120cf4-3b56-4392-9ee5-8a70257080a3
2024711849152	2024711849152	2024	7	11	8	48	65s	2024	7	11	8	49	152	2		Fern	FERN_77		Nephrolepis biserrata	Nephrolepidaceae	Valid	0.6	304	19	15	31	35	10	false	0	vegetating	1				0	0.3	1	main trunk	Subadult			vegetating	65s-152/18	10	2	0f7835e8-cbe9-40d2-bcc4-76689d7b1def
2024711849152	2024711849152	2024	7	11	8	48	65s	2024	7	11	8	49	152	2		Fern	FERN_77		Nephrolepis biserrata	Nephrolepidaceae	Valid	0.4	300	26	16	38	43	9	false	0	vegetating	3				0	0.2	1	main trunk	Adult			vegetating	65s-152/19	10	4	f01f7840-fca6-4215-867c-3abc9ff86036
2024711849152	2024711849152	2024	7	11	8	48	65s	2024	7	11	8	49	152	2		Fern	FERN_77		Nephrolepis biserrata	Nephrolepidaceae	Valid	0.6	300				20	4	false	0	vegetating	3				0	1	1	main trunk	Subadult		Hanging from tree	vegetating	65s-152/20	10	8	21f4adc3-7bc5-4e66-814a-32a1d64c563b
2024711849152	2024711849152	2024	7	11	8	48	65s	2024	7	11	8	49	152	2		Fern	FERN_77		Nephrolepis biserrata	Nephrolepidaceae	Valid	0.8	260	22	162	26	30	4	false	0	vegetating	3				0	0.2	1	main trunk	Subadult			vegetating	65s-152/22	10	14	1ac98f3d-2ed0-4731-bc22-89d36041e6e7
2024711849152	2024711849152	2024	7	11	8	48	65s	2024	7	11	8	49	152	2		Fern	FERN_77		Nephrolepis biserrata	Nephrolepidaceae	Valid	0.7	240	17	42	26	38	8	false	0	vegetating	4				0	0.5	1	main trunk	Adult			vegetating	65s-152/24	10	21	c4a35a59-bf43-44d1-88e9-cbf5cbd60b6d
2024711849152	2024711849152	2024	7	11	8	48	65s	2024	7	11	8	49	152	2		Fern	FERN_77		Nephrolepis biserrata	Nephrolepidaceae	Valid	0.9	240	10	11	5	17	6.5	false	0	vegetating	1				0	0.1	1	main trunk	Juvenile/Sapling			vegetating	65s-152/25	10	23	ac758cde-d6ae-4ebf-89dd-dd588a6aaf48
2024711849152	2024711849152	2024	7	11	8	48	65s	2024	7	11	8	49	152	2		Fern	FERN_169		Lepisorus spicata	Polypodiaceae	Valid	1.85	110	0.5	1	3.3	3.5	0.4	false	0	vegetating	1				0		1	main trunk	Juvenile/Sapling			vegetating	65s-152/26	10	28	7d123b79-a126-4865-af74-837d1bfb5dd6
2024711849152	2024711849152	2024	7	11	8	48	65s	2024	7	11	8	49	152	1		Seed plant	MUS_397		Angraecum pectinatum	orchidaceae	Valid	0.7	220	0.3	0.6	0.3	0.3	0.2	false	0	vegetating	4	0	0				1	main trunk	Juvenile/Sapling	103-646		vegetating	65s-152/27	10	31	2f1e42db-3f3f-4fcb-902e-4f59306154f2
2024711849152	2024711849152	2024	7	11	8	48	65s	2024	7	11	8	49	152	1		Seed plant	MUS_397		Angraecum pectinatum	orchidaceae	Valid	0.9	310	0.6	1.2	1	0.6	0.2	false	0	vegetating	5	0	0				1	main trunk	Juvenile/Sapling	647		vegetating	65s-152/28	10	34	8cc111cc-8bdd-485e-98dc-ec0cfda294b8
2024711849152	2024711849152	2024	7	11	8	48	65s	2024	7	11	8	49	152	1		Seed plant	MUS_397		Angraecum pectinatum	orchidaceae	Valid	0.9	310	0.6	0.7	0.3	0.6	0.2	false	0	vegetating	4	0	0				1	main trunk	Juvenile/Sapling	650		vegetating	65s-152/29	10	37	fa651990-4087-4c14-8695-52a5055b4a0e
2024711849152	2024711849152	2024	7	11	8	48	65s	2024	7	11	8	49	152	1		Seed plant	MUS_397		Angraecum pectinatum	orchidaceae	Valid	1.1	10	1	1.1	1.5	0.7	0.3	false	0	vegetating	5	0	0	0			1	main trunk	Juvenile/Sapling			vegetating	65s-152/30	10	40	278cb983-11bb-492c-86bc-cf702e11a201
2024711849152	2024711849152	2024	7	11	8	48	65s	2024	7	11	8	49	152	1		Seed plant	MUS_397		Angraecum pectinatum	orchidaceae	Valid	1.3	254	0.6	1.6	1.6	0.9	0.3	false	0	vegetating	7	0	0				1	main trunk	Juvenile/Sapling			vegetating	65s-152/31	10	42	e44c8a53-e735-4d25-ad7f-120ecf6c3fa8
2024711849152	2024711849152	2024	7	11	8	48	65s	2024	7	11	8	49	152	1		Seed plant	MUS_397		Angraecum pectinatum	orchidaceae	Valid	1.5	234	1	1.7	1.5	0.8	0.2	false	0	vegetating	6	0	0				1	main trunk	Juvenile/Sapling			vegetating	65s-152/32	10	45	ad3cc9a2-69bc-487d-9ba0-0e2d5875155a
2024711849152	2024711849152	2024	7	11	8	48	65s	2024	7	11	8	49	152	1		Seed plant	MUS_397		Angraecum pectinatum	orchidaceae	Valid	1.6	310	2	2.8	2.6	1.3	0.3	false	0	vegetating	7	0	0				1	main trunk	Juvenile/Sapling			vegetating	65s-152/33	10	48	90a4fd6b-6421-486a-81aa-3a27bfbb523a
2024711849152	2024711849152	2024	7	11	8	48	65s	2024	7	11	8	49	152	1		Seed plant	MUS_397		Angraecum pectinatum	orchidaceae	Valid	2.1	62						false	3	unripe fruit	11	0	1				1	main trunk	Adult			fruiting	65s-152/34	10	57	521d7397-9740-413f-901c-f7c1bb2c9bcb
2024711849152	2024711849152	2024	7	11	8	48	65s	2024	7	11	8	49	152	1		Seed plant	MUS_397		Angraecum pectinatum	orchidaceae	Valid	2.15	136						false	0	vegetating	5	0	0				1	main trunk	Juvenile/Sapling			vegetating	65s-152/35	10	59	802fccf6-cebd-41f9-90a3-97a7ca546444
2024711849152	2024711849152	2024	7	11	8	48	65s	2024	7	11	8	49	152	1		Seed plant	MUS_397		Angraecum pectinatum	orchidaceae	Valid	2.1	180						false	0	vegetating	4	0	0				1	main trunk	Juvenile/Sapling	651		vegetating	65s-152/36	11	0	4e65ace5-ea55-4018-94fd-6fe76bbdc288
2024711849152	2024711849152	2024	7	11	8	48	65s	2024	7	11	8	49	152	1		Seed plant	MUS_397		Angraecum pectinatum	orchidaceae	Valid	2.15	180						false	0	vegetating	5	0	0				1	main trunk	Juvenile/Sapling	651		vegetating	65s-152/37	11	2	b6ae1773-4495-4010-9d24-cd714b46bc3e
2024711849152	2024711849152	2024	7	11	8	48	65s	2024	7	11	8	49	152	1		Seed plant	MUS_383		Angraecum sp.	orchidaceae	Valid	2.3	250						false	3	unripe fruit	3	0	3				1	main trunk	Adult	652-653		fruiting	65s-152/38	11	3	3eee21cf-5902-4949-b803-45a592f6d468
2024711849152	2024711849152	2024	7	11	8	48	65s	2024	7	11	8	49	152	1		Seed plant	MUS_397		Angraecum pectinatum	orchidaceae	Valid	3	100						false	0	vegetating	5	0	0				1	main trunk	Juvenile/Sapling	654		vegetating	65s-152/39	11	9	24c41a04-203b-43a0-ae69-7c5187eb4dd1
2024711849152	2024711849152	2024	7	11	8	48	65s	2024	7	11	8	49	152	1		Seed plant	MUS_397		Angraecum pectinatum	orchidaceae	Valid	3.9	170						false	0	vegetating	3	0	0				1	main trunk	Juvenile/Sapling	655		vegetating	65s-152/40	11	12	5adc378b-1d3a-419e-b3dc-d0526060e406
2024711849152	2024711849152	2024	7	11	8	48	65s	2024	7	11	8	49	152	1		Seed plant	MUS_106		Cnestis polyphylla	Connaraceae	Valid	7							false	0	vegetating							1	main trunk	Adult	656-658			65s-152/	11	15	ea1322d8-9eb6-4251-8f02-20faa8e76275
2024711849152	2024711849152	2024	7	11	8	48	65s	2024	7	11	8	49	152	1		Seed plant	MUS_397		Angraecum pectinatum	orchidaceae	Valid	2.3	170						false	0	vegetating	3	0	0				1	main trunk	Juvenile/Sapling	659		vegetating	65s-152/42	11	19	d3b9c773-9ae6-42b7-8d92-5839595aaee5
2024711849152	2024711849152	2024	7	11	8	48	65s	2024	7	11	8	49	152	1		Seed plant	MUS_397		Angraecum pectinatum	orchidaceae	Valid	2.4	180						false	0	vegetating	3	0	0				1	main trunk	Juvenile/Sapling	659		vegetating	65s-152/43	11	21	60f56a69-2e2e-403a-861d-8b611696bddd
2024711849152	2024711849152	2024	7	11	8	48	65s	2024	7	11	8	49	152	1		Seed plant	MUS_397		Angraecum pectinatum	orchidaceae	Valid	5	200						false	0	vegetating	6	0	0				1	main trunk	Juvenile/Sapling	660		vegetating	65s-152/44	11	25	2e0031c8-990b-4cd0-a2b3-ebdba46a86a4
2024711849152	2024711849152	2024	7	11	8	48	65s	2024	7	11	8	49	152	1		Seed plant	MUS_397		Angraecum pectinatum	orchidaceae	Valid	5.3	200						false	0	vegetating	5	0	0				1	main trunk	Subadult	661		vegetating	65s-152/45	11	26	4c80457a-5544-40fb-8359-851db80ff830
2024711849152	2024711849152	2024	7	11	8	48	65s	2024	7	11	8	49	152	1		Seed plant	MUS_397		Angraecum pectinatum	orchidaceae	Valid	2.4	240						false	0	vegetating	11	0	0				1	main trunk	Adult	662		vegetating	65s-152/46	11	29	6b6ca6e5-5f63-40eb-abb7-e919eaf65dbd
2024711849152	2024711849152	2024	7	11	8	48	65s	2024	7	11	8	49	152	1		Seed plant	MUS_397		Angraecum pectinatum	orchidaceae	Valid	2.3	240						false	3	unripe fruit		0	3				1	main trunk	Adult	663		fruiting	65s-152/47	11	39	fec95122-d86a-48f8-9627-d89b4ee4e2e9
2024711849152	2024711849152	2024	7	11	8	48	65s	2024	7	11	8	49	152	1		Seed plant	MUS_397		Angraecum pectinatum	orchidaceae	Valid	2.4	240						false	0	vegetating	9	0	0				1	main trunk	Adult	664		vegetating	65s-152/48	11	41	66c8ea32-2d68-4715-b033-40b2e066906c
2024711849152	2024711849152	2024	7	11	8	48	65s	2024	7	11	8	49	152	1		Seed plant	MUS_383		Angraecum sp.	orchidaceae	Valid	2.1							false	0	vegetating	4	0	0				1	main trunk	Adult	666	Next to previous calceolus recorded	vegetating	65s-152/49	11	42	aadfe77e-894f-4546-a1f6-d4f32e5e532a
2024711849152	2024711849152	2024	7	11	8	48	65s	2024	7	11	8	49	152	1		Seed plant	MUS_397		Angraecum pectinatum	orchidaceae	Valid	2.5	310						false	4	ripe fruit	9	0	1				1	main trunk	Adult	667		fruiting	65s-152/50	11	44	572c6ff3-462a-42f5-8d36-d1e9aaeb03a6
2024711849152	2024711849152	2024	7	11	8	48	65s	2024	7	11	8	49	152	1		Seed plant	MUS_397		Angraecum pectinatum	orchidaceae	Valid	2.55	310						false	3	unripe fruit	13	0	1				1	main trunk	Adult	668		fruiting	65s-152/51	11	46	81c8e49e-fa48-4b5f-870a-001b48819773
2024711849152	2024711849152	2024	7	11	8	48	65s	2024	7	11	8	49	152	1		Seed plant	MUS_397		Angraecum pectinatum	orchidaceae	Valid	2.6	310						false	3	unripe fruit	18	2	2				1	main trunk	Adult	669		fruiting	65s-152/52	11	48	f61fc124-890c-4835-a922-23648f84c0d9
2024711849152	2024711849152	2024	7	11	8	48	65s	2024	7	11	8	49	152	1		Seed plant	MUS_397		Angraecum pectinatum	orchidaceae	Valid	2.7	310						false	3	unripe fruit		0	1				1	main trunk	Adult	670		fruiting	65s-152/53	11	50	f8841f1d-dfe4-423e-8e52-6811db2ca702
2024711849152	2024711849152	2024	7	11	8	48	65s	2024	7	11	8	49	152	1		Seed plant	MUS_397		Angraecum pectinatum	orchidaceae	Valid	2.6	270						false	0	vegetating	20	0	0				1	main trunk	Adult	671		vegetating	65s-152/54	11	51	ab6865c1-3b10-4e40-8c37-a26bb69106f6
2024711849152	2024711849152	2024	7	11	8	48	65s	2024	7	11	8	49	152	1		Seed plant	MUS_397		Angraecum pectinatum	orchidaceae	Valid	2.65	270						false	0	vegetating	27	0	0				1	main trunk	Adult	672		vegetating	65s-152/55	11	53	34ee734c-a99d-42cd-ae63-1ce2cd89f0c3
2024711849152	2024711849152	2024	7	11	8	48	65s	2024	7	11	8	49	152	1		Seed plant	MUS_397		Angraecum pectinatum	orchidaceae	Valid	2.7	270						false	0	vegetating	43	0	0				1	main trunk	Adult	673		vegetating	65s-152/56	11	55	ecd417b6-af9e-43ec-b9e8-092a92a12ceb
2024711849152	2024711849152	2024	7	11	8	48	65s	2024	7	11	8	49	152	1		Seed plant	MUS_397		Angraecum pectinatum	orchidaceae	Valid	2.7	270						false	0	vegetating	22	0	0				1	main trunk	Adult	674		vegetating	65s-152/57	11	56	2ccdb838-aa9c-4ea9-bc22-374d52fc97fa
2024711849152	2024711849152	2024	7	11	8	48	65s	2024	7	11	8	49	152	1		Seed plant	MUS_397		Angraecum pectinatum	orchidaceae	Valid	2.7	270						false	0	vegetating		0	0				1	main trunk	Adult	674	In background	vegetating	65s-152/58	11	58	7f8d5118-f871-47b4-988b-a3f5766e34e3
2024711849152	2024711849152	2024	7	11	8	48	65s	2024	7	11	8	49	152	1		Seed plant	MUS_397		Angraecum pectinatum	orchidaceae	Valid	2.8	270						false	0	vegetating		0	0				1	main trunk	Adult	675		vegetating	65s-152/59	11	58	3767ee47-9d42-422e-b0da-4e32f0b575b6
2024711849152	2024711849152	2024	7	11	8	48	65s	2024	7	11	8	49	152	1		Seed plant	MUS_392		Angraecum mauritianum	orchidaceae	Valid	3.5	270						false	0	vegetating	4	0	0				1	main trunk	Subadult	676		vegetating	65s-152/60	12	1	1962b242-01c5-4afc-8165-0093206f3728
2024711849152	2024711849152	2024	7	11	8	48	65s	2024	7	11	8	49	152	1		Seed plant	MUS_397		Angraecum pectinatum	orchidaceae	Valid	3.5	270						false	4	ripe fruit	10	0	1				1	main trunk	Adult	677		fruiting	65s-152/61	12	2	81b55622-087d-48de-bf00-8431d50b1455
2024711849152	2024711849152	2024	7	11	8	48	65s	2024	7	11	8	49	152	1		Seed plant	MUS_392		Angraecum mauritianum	orchidaceae	Valid	3.8	300						false	0	vegetating	2	0	0				1	main trunk	Subadult	678		vegetating	65s-152/62	12	3	60cf0d26-5ce5-4587-8e2e-cb8757932609
2024711849152	2024711849152	2024	7	11	8	48	65s	2024	7	11	8	49	152	1		Seed plant	MUS_392		Angraecum mauritianum	orchidaceae	Valid	3.8	270						false	0	vegetating	2	0	0				1	main trunk	Subadult	679		vegetating	65s-152/63	12	4	6825d8fa-9cb0-49da-a619-b760d1a40496
2024711849152	2024711849152	2024	7	11	8	48	65s	2024	7	11	8	49	152	1		Seed plant	MUS_392		Angraecum mauritianum	orchidaceae	Valid	4	300						false	0	vegetating	6	0	0				1	main trunk	Adult	680		vegetating	65s-152/64	12	5	f7694124-1f04-4078-be09-53ee5e17e895
2024711849152	2024711849152	2024	7	11	8	48	65s	2024	7	11	8	49	152	1		Seed plant	MUS_392		Angraecum mauritianum	orchidaceae	Valid	4.5	270						false	0	vegetating	3	0	0				1	main trunk	Subadult	681		vegetating	65s-152/65	12	6	e7a76616-f373-4fa6-ba7f-bdd54cfaa132
2024711849152	2024711849152	2024	7	11	8	48	65s	2024	7	11	8	49	152	1		Seed plant	MUS_397		Angraecum pectinatum	orchidaceae	Valid	6	300						false	0	vegetating		0	0				1	main trunk	Juvenile/Sapling	683		vegetating	65s-152/66	12	11	29b37005-ceeb-4de7-8b99-5c1cceb2b618
2024711849152	2024711849152	2024	7	11	8	48	65s	2024	7	11	8	49	152	1		Seed plant	MUS_397		Angraecum pectinatum	orchidaceae	Valid	8	270						false	0	vegetating							1	main trunk	Juvenile/Sapling	682		vegetating	65s-152/67	12	12	61806846-bdae-4ae2-bba6-29629c929707
2024711849152	2024711849152	2024	7	11	8	48	65s	2024	7	11	8	49	152	1		Seed plant	MUS_397		Angraecum pectinatum	orchidaceae	Valid	7	280						false	0	vegetating	5	0	0				1	main trunk	Juvenile/Sapling	684		vegetating	65s-152/68	12	13	36def87b-e732-47d3-9c04-ddd5bd22bd93
2024711849152	2024711849152	2024	7	11	8	48	65s	2024	7	11	8	49	152	1		Seed plant	MUS_397		Angraecum pectinatum	orchidaceae	Valid	6.5	210						false	0	vegetating		0	0				1	main trunk	Adult	685		vegetating	65s-152/69	12	17	f25fafaa-89e5-4655-9cd0-1e77ce1982b8
2024711849152	2024711849152	2024	7	11	8	48	65s	2024	7	11	8	49	152	1		Seed plant	MUS_397		Angraecum pectinatum	orchidaceae	Valid	7	180						false	0	vegetating	5	0	0				1	main trunk	Juvenile/Sapling	686		vegetating	65s-152/70	12	18	74561818-25f4-49e3-bbf5-fc7fbd2f75d7
2024711849152	2024711849152	2024	7	11	8	48	65s	2024	7	11	8	49	152	1		Seed plant	MUS_397		Angraecum pectinatum	orchidaceae	Valid	7.5	180						false	0	vegetating	7	0	0				1	main trunk	Juvenile/Sapling	687		vegetating	65s-152/71	12	20	7cf09ae8-ee2a-4d04-ada8-fd8df27a8a07
2024711849152	2024711849152	2024	7	11	8	48	65s	2024	7	11	8	49	152	1		Seed plant	MUS_383		Angraecum sp.	orchidaceae	Valid	8	160						false	0	dry/fallen fruit	6	0	0				2	crown	Adult	688		vegetating	65s-152/72	12	21	d0872348-5877-44e8-98d6-751cf6bc4759
2024711849152	2024711849152	2024	7	11	8	48	65s	2024	7	11	8	49	152	1		Seed plant	MUS_400		Angraecum mauritianum	orchidaceae	Valid	7	160						false	0	vegetating	4	0	0				1	main trunk	Juvenile/Sapling	689		vegetating	65s-152/73	12	32	b0eda6db-80ca-482d-90b0-fff52368355d
2024711849152	2024711849152	2024	7	11	8	48	65s	2024	7	11	8	49	152	1		Seed plant	MUS_397		Angraecum pectinatum	orchidaceae	Valid	7	130						false	0	vegetating	13	0	0				1	main trunk	Adult	690		vegetating	65s-152/74	12	33	2448a6ab-bd2d-46c4-9f14-6fed98a8a618
2024711849152	2024711849152	2024	7	11	8	48	65s	2024	7	11	8	49	152	2		Fern	FERN_169		Lepisorus spicata	Polypodiaceae	Valid	7	50						false	0	vegetating	2				0		1	main trunk	Adult	691		vegetating	65s-152/75	12	34	b21d514f-be7e-42ee-8c81-63a3ac2e535a
2024711849152	2024711849152	2024	7	11	8	48	65s	2024	7	11	8	49	152	1		Seed plant	MUS_392		Angraecum mauritianum	orchidaceae	Valid	7.2	110						false	0	vegetating	2	0	0				1	main trunk	Adult	692		vegetating	65s-152/76	12	37	18c56821-1141-4a95-ae23-1396e7e1b470
2024711849152	2024711849152	2024	7	11	8	48	65s	2024	7	11	8	49	152	1		Seed plant	MUS_397		Angraecum pectinatum	orchidaceae	Valid	7.2	30						false	3	unripe fruit	19	0	1				1	main trunk	Adult	693		fruiting	65s-152/77	12	38	6fc69e66-082d-4cb0-b66c-80877d69e2c5
2024711849152	2024711849152	2024	7	11	8	48	65s	2024	7	11	8	49	152	1		Seed plant	MUS_397		Angraecum pectinatum	orchidaceae	Valid	7.2	30						false	3	unripe fruit	28	0	1				1	main trunk	Adult	693		fruiting	65s-152/77b	12	38	6fc69e66-082d-4cb0-b66c-80877d69e2c51
2024711849152	2024711849152	2024	7	11	8	48	65s	2024	7	11	8	49	152	1		Seed plant	MUS_397		Angraecum pectinatum	orchidaceae	Valid	7.4	30						false	0	unripe fruit	15	0	1				1	main trunk	Adult	694		fruiting	65s-152/78	12	40	d83ed0b1-eec2-4e3b-bba3-652495f55c2b
2024711849152	2024711849152	2024	7	11	8	48	65s	2024	7	11	8	49	152	1		Seed plant	MUS_397		Angraecum pectinatum	orchidaceae	Valid	7.4	30						false	0	vegetating		0	0				1	main trunk	Subadult	694		vegetating	65s-152/78b	12	40	d83ed0b1-eec2-4e3b-bba3-652495f55c2b1
2024711849152	2024711849152	2024	7	11	8	48	65s	2024	7	11	8	49	152	1		Seed plant	MUS_392		Angraecum mauritianum	orchidaceae	Valid	7.3	30						false	0	vegetating	7	0	0				1	main trunk	Adult	694		vegetating	65s-152/79	12	42	5b2a91c9-7021-416c-87d9-beb2e237c636
2024711849152	2024711849152	2024	7	11	8	48	65s	2024	7	11	8	49	152	1		Seed plant	MUS_392		Angraecum mauritianum	orchidaceae	Valid	8	60						false	0	vegetating	2	0	0				1	main trunk	Subadult	696		vegetating	65s-152/80	12	44	8d1a5b69-bf77-4939-bfa3-4802fa94ed67
2024711849152	2024711849152	2024	7	11	8	48	65s	2024	7	11	8	49	152	2		Fern	FERN_169		Lepisorus spicata	Polypodiaceae	Valid	9	160						false	4	ripe fruit	2				1		1	main trunk	Adult	697		reproducing	65s-152/81	12	46	f8139152-7b6b-449d-bf17-79ba35e4e279
2024711849152	2024711849152	2024	7	11	8	48	65s	2024	7	11	8	49	152	1		Seed plant	MUS_397		Angraecum pectinatum	orchidaceae	Valid	9	30						false	0	vegetating	6	0	0				1	main trunk	Juvenile/Sapling	700	End of epiphytes higher then 2m on smallest stem	vegetating	65s-152/83	12	48	da7cb867-484a-478f-a470-cdde43ca6f71
2024711849152	2024711849152	2024	7	11	8	48	65s	2024	7	11	8	49	152	2		Fern	FERN_77		Nephrolepis biserrata	Nephrolepidaceae	Valid	2.9	120						false	0	vegetating	4				0		1	main trunk	Adult			vegetating	65s-152/84	13	11	cc05c18a-2a97-4c88-ae55-efb34eedabb4
2024711849152	2024711849152	2024	7	11	8	48	65s	2024	7	11	8	49	152	2		Fern	FERN_77		Nephrolepis biserrata	Nephrolepidaceae	Valid	4.3	120						false	0	vegetating	3				0		1	main trunk	Subadult			vegetating	65s-152/85	13	12	8f426d84-e5e8-47a3-ad03-aef695a727d8
2024711849152	2024711849152	2024	7	11	8	48	65s	2024	7	11	8	49	152	2		Fern	FERN_77		Nephrolepis biserrata	Nephrolepidaceae	Valid	4.7	120						false	0	vegetating	25				4		1	main trunk	Adult		Large and big patch	reproducing	65s-152/86	13	13	d09f546e-7bba-435c-92f8-7761e2d44162
2024711849152	2024711849152	2024	7	11	8	48	65s	2024	7	11	8	49	152	2		Fern	FERN_77		Nephrolepis biserrata	Nephrolepidaceae	Valid	4.4	120						false	0	vegetating	2				0		1	main trunk	Subadult			vegetating	65s-152/87	13	17	5236bfb4-7077-4de1-b82d-36fa302f7f61
2024711849152	2024711849152	2024	7	11	8	48	65s	2024	7	11	8	49	152	1		Seed plant	MUS_397		Angraecum pectinatum	orchidaceae	Valid	2.45	40						false	4	ripe fruit	13	0	2				1	main trunk	Adult	701		fruiting	65s-152/88	13	18	1f794d26-65f9-4b76-a650-a6560d9a8bda
2024711849152	2024711849152	2024	7	11	8	48	65s	2024	7	11	8	49	152	1		Seed plant	MUS_397		Angraecum pectinatum	orchidaceae	Valid	2.85	40						false	0	flower bud	23	0	0				1	main trunk	Adult	702		vegetating	65s-152/89	13	20	de8bff87-2f3e-468b-b50e-f00abfd47fe6
2024711849152	2024711849152	2024	7	11	8	48	65s	2024	7	11	8	49	152	1		Seed plant	MUS_400		Polystachia mauritiana s.l.	orchidaceae	Valid	6.5	206						false	0	vegetating	2	0	0				2	crown	Born/Seedling	703		vegetating	65s-152/90	13	24	a2dae12e-0445-40d5-a158-188fd7028c10
2024711849152	2024711849152	2024	7	11	8	48	65s	2024	7	11	8	49	152	1		Seed plant	MUS_460		Polystachia mauritiana s.l.	orchidaceae	Valid	5.5	100						false	3	unripe fruit	4	0	4				2	crown	Adult	704-706		fruiting	65s-152/91	13	29	adad730b-0450-4633-b32d-b730631658ff
2024711849152	2024711849152	2024	7	11	8	48	65s	2024	7	11	8	49	152	1		Seed plant	MUS_460		Polystachia mauritiana s.l.	orchidaceae	Valid	6	100						false	0	vegetating	2	0	0				2	crown	Subadult	707-708		vegetating	65s-152/92	13	30	b6e79188-c265-4cc9-b6fd-92580eb6fa48
2024711849152	2024711849152	2024	7	11	8	48	65s	2024	7	11	8	49	152	2		Fern	FERN_77		Nephrolepis biserrata	Nephrolepidaceae	Valid	6	100						false	0	vegetating	5				0		2	crown	Adult	709		vegetating	65s-152/93	13	31	483fb192-733b-4a56-9d2d-5cc820709fd9
2024711849152	2024711849152	2024	7	11	8	48	65s	2024	7	11	8	49	152	1		Seed plant	MUS_460		Polystachia mauritiana s.l.	orchidaceae	Valid	6.5	30						false	3	unripe fruit	3	0	12				2	crown	Adult	710		fruiting	65s-152/94	13	38	56410b50-cb51-4258-b383-99e39b5cdd55
2024711849152	2024711849152	2024	7	11	8	48	65s	2024	7	11	8	49	152	1		Seed plant	MUS_460		Polystachia mauritiana s.l.	orchidaceae	Valid	5.6	30						false	3	unripe fruit	4	0	21				2	crown	Adult	711-712		fruiting	65s-152/95	13	40	63bd3c82-0464-4ff0-81b6-6718cc206c38
2024711849152	2024711849152	2024	7	11	8	48	65s	2024	7	11	8	49	152	1		Seed plant	MUS_460		Polystachia mauritiana s.l.	orchidaceae	Valid	6	30						false	0	vegetating	2	0	0				2	crown	Juvenile/Sapling	713		vegetating	65s-152/96	13	42	c35120d7-40f0-4bbd-978f-b30b32b22f5e
2024711849152	2024711849152	2024	7	11	8	48	65s	2024	7	11	8	49	152	1		Seed plant	zz		Polystachia mauritiana s.l.	orchidaceae	Valid	6	30						false	0	vegetating	2	0	0				2	crown	Juvenile/Sapling	714		vegetating	65s-152/97	13	44	a101db0a-7c4f-43c0-8656-696434fcb188
2024711849152	2024711849152	2024	7	11	8	48	65s	2024	7	11	8	49	152	1		Seed plant	MUS_460		Polystachia mauritiana s.l.	orchidaceae	Valid	9	30						false	0	vegetating	2	0	0				2	crown	Juvenile/Sapling	715		vegetating	65s-152/98	13	45	4ef97497-a150-4ff9-93f5-f86cfd028b08
2024711849152	2024711849152	2024	7	11	8	48	65s	2024	7	11	8	49	152	1		Seed plant	MUS_460		Polystachia mauritiana s.l.	orchidaceae	Valid	5.2	30						false	0	vegetating	1	0	0				2	crown	Juvenile/Sapling	716		vegetating	65s-152/99	13	46	abadaf3c-0713-4615-b483-db475e182fbd
2024711849152	2024711849152	2024	7	11	8	48	65s	2024	7	11	8	49	152	2		Fern	FERN_173		Microsorum punctatum	Polypodiaceae	Valid	9	From 30 to 120						false	0	vegetating							1	main trunk	Adult	717		vegetating	65s-152/101	13	52	d8f4b6fe-f00f-4594-9e2d-b08e44732591
2024711849152	2024711849152	2024	7	11	8	48	65s	2024	7	11	8	49	152	1		Seed plant	MUS_400		Angraecum pectinatum	orchidaceae	Valid	9	40								unripe fruit			1					crown	Adult	718		fruiting	65s-152/102	14	5	042bde49-8b54-4f4e-b864-ad407e783915
2024711849152	2024711849152	2024	7	11	8	48	65s	2024	7	11	8	49	152	1		Seed plant	MUS_400		Angraecum pectinatum	orchidaceae	Valid	9	40								vegetating	4							crown	Juvenile/Sapling	718		vegetating	65s-152/102b	14	5	042bde49-8b54-4f4e-b864-ad407e783916
2024711849152	2024711849152	2024	7	11	8	48	65s	2024	7	11	8	49	152	1		Seed plant	MUS_400		Angraecum pectinatum	orchidaceae	Valid	9	40								vegetating	2							crown	Juvenile/Sapling	718		vegetating	65s-152/102c	14	5	042bde49-8b54-4f4e-b864-ad407e783917
2024711849152	2024711849152	2024	7	11	8	48	65s	2024	7	11	8	49	152	1		Seed plant	MUS_400		Angraecum mauritianum	orchidaceae	Valid	9	40								vegetating	8							crown	Adult	719		vegetating	65s-152/102d	14	5	042bde49-8b54-4f4e-b864-ad407e783918
2024711849152	2024711849152	2024	7	11	8	48	65s	2024	7	11	8	49	152	1		Seed plant	MUS_400		Angraecum mauritianum	orchidaceae	Valid	9	40								vegetating	9							crown	Adult	719		vegetating	65s-152/102e	14	5	042bde49-8b54-4f4e-b864-ad407e783919
2024711849152	2024711849152	2024	7	11	8	48	65s	2024	7	11	8	49	152	1		Seed plant	MUS_400		Angraecum mauritianum	orchidaceae	Valid	9	40								vegetating	8							crown	Adult	719		vegetating	65s-152/102f	14	5	042bde49-8b54-4f4e-b864-ad407e783920
2024711849152	2024711849152	2024	7	11	8	48	65s	2024	7	11	8	49	152	1		Seed plant	MUS_400		Angraecum pectinatum	orchidaceae	Valid	9	40								vegetating	5							crown	Juvenile/Sapling	719		vegetating	65s-152/102g	14	5	042bde49-8b54-4f4e-b864-ad407e783921
2024711849152	2024711849152	2024	7	11	8	48	65s	2024	7	11	8	49	152	1		Seed plant	MUS_400		Angraecum pectinatum	orchidaceae	Valid	9	40								vegetating								crown	Adult	719		vegetating	65s-152/102h	14	5	042bde49-8b54-4f4e-b864-ad407e783922
2024711849152	2024711849152	2024	7	11	8	48	65s	2024	7	11	8	49	152	1		Seed plant	MUS_400		Angraecum pectinatum	orchidaceae	Valid	9	40								vegetating	20							crown	Adult	719		vegetating	65s-152/102i	14	5	042bde49-8b54-4f4e-b864-ad407e783923
2024711849152	2024711849152	2024	7	11	8	48	65s	2024	7	11	8	49	152	1		Seed plant	MUS_400		Angraecum pectinatum	orchidaceae	Valid	9.5	40								vegetating	7							crown	Juvenile/Sapling	722		vegetating	65s-152/102j	14	5	042bde49-8b54-4f4e-b864-ad407e783924
2024711849152	2024711849152	2024	7	11	8	48	65s	2024	7	11	8	49	152	1		Seed plant	MUS_400		Nephrolepis biserrata	Nephrolepidaceae	Valid	9.5	40								vegetating	3							crown	Subadult	722		vegetating	65s-152/102k	14	5	042bde49-8b54-4f4e-b864-ad407e783925
2024711849152	2024711849152	2024	7	11	8	48	65s	2024	7	11	8	49	152	1		Seed plant	MUS_400		Angraecum sp.	orchidaceae	Valid	10	40								dry/fallen fruit	4							crown	Adult	724		vegetating	65s-152/102l	14	5	042bde49-8b54-4f4e-b864-ad407e783926
2024711849152	2024711849152	2024	7	11	8	48	65s	2024	7	11	8	49	152	1		Seed plant	MUS_400		Angraecum pectinatum	orchidaceae	Valid	10	40								vegetating	5							crown	Juvenile/Sapling	725		vegetating	65s-152/102m	14	5	042bde49-8b54-4f4e-b864-ad407e783927
2024711849152	2024711849152	2024	7	11	8	48	65s	2024	7	11	8	49	152	1		Seed plant	MUS_400		Angraecum mauritianum	orchidaceae	Valid	10	40								vegetating	3							crown	Juvenile/Sapling	725		vegetating	65s-152/102n	14	5	042bde49-8b54-4f4e-b864-ad407e783928
2024711849152	2024711849152	2024	7	11	8	48	65s	2024	7	11	8	49	152	1		Seed plant	MUS_400		Angraecum mauritianum	orchidaceae	Valid	11	40								vegetating	7							crown	Adult	726		vegetating	65s-152/102o	14	5	042bde49-8b54-4f4e-b864-ad407e783929
2024711849152	2024711849152	2024	7	11	8	48	65s	2024	7	11	8	49	152	1		Seed plant	MUS_400		Angraecum pectinatum	orchidaceae	Valid	11	40								vegetating	10							crown	Subadult	726		vegetating	65s-152/102p	14	5	042bde49-8b54-4f4e-b864-ad407e783930
2024711849152	2024711849152	2024	7	11	8	48	65s	2024	7	11	8	49	152	1		Seed plant	MUS_400		Angraecum pectinatum	orchidaceae	Valid	11	40								vegetating	17							crown	Adult	727		vegetating	65s-152/102q	14	5	042bde49-8b54-4f4e-b864-ad407e783931
2024711849152	2024711849152	2024	7	11	8	48	65s	2024	7	11	8	49	152	1		Seed plant	MUS_400		Angraecum pectinatum	orchidaceae	Valid	11	40								vegetating	5							crown	Subadult	727		vegetating	65s-152/102r	14	5	042bde49-8b54-4f4e-b864-ad407e783932
2024711849152	2024711849152	2024	7	11	8	48	65s	2024	7	11	8	49	152	1		Seed plant	MUS_400		Angraecum mauritianum	orchidaceae	Valid	9	40								vegetating	14							crown	Adult	728	728-734, 738: right branch from 9 to 11m	vegetating	65s-152/103	14	6	dfc09178-795a-4503-964b-b21235dddfc3
2024711849152	2024711849152	2024	7	11	8	48	65s	2024	7	11	8	49	152						Angraecum mauritianum	orchidaceae	Valid	9	40								vegetating								crown	Adult	728	728-734, 738: right branch from 9 to 11m		65s-152/103b	14	6	dfc09178-795a-4503-964b-b21235dddfc4
2024711849152	2024711849152	2024	7	11	8	48	65s	2024	7	11	8	49	152						Angraecum mauritianum	orchidaceae	Valid	9	40								vegetating								crown	Adult	728	728-734, 738: right branch from 9 to 11m		65s-152/103c	14	6	dfc09178-795a-4503-964b-b21235dddfc5
2024711849152	2024711849152	2024	7	11	8	48	65s	2024	7	11	8	49	152						Angraecum pectinatum	orchidaceae	Valid	9	40								vegetating	9							crown	Adult	728	728-734, 738: right branch from 9 to 11m		65s-152/103d	14	6	dfc09178-795a-4503-964b-b21235dddfc6
2024711849152	2024711849152	2024	7	11	8	48	65s	2024	7	11	8	49	152						Angraecum mauritianum	orchidaceae	Valid	9	40								vegetating	4							crown	Subadult	728	728-734, 738: right branch from 9 to 11m		65s-152/103e	14	6	dfc09178-795a-4503-964b-b21235dddfc7
2024711849152	2024711849152	2024	7	11	8	48	65s	2024	7	11	8	49	152						Angraecum pectinatum	orchidaceae	Valid	9	40								vegetating	5							crown	Juvenile/Sapling	728	728-734, 738: right branch from 9 to 11m		65s-152/103f	14	6	dfc09178-795a-4503-964b-b21235dddfc8
2024711849152	2024711849152	2024	7	11	8	48	65s	2024	7	11	8	49	152						Angraecum pectinatum	orchidaceae	Valid	10	40								vegetating	9							crown	Subadult	729	728-734, 738: right branch from 9 to 11m		65s-152/103g	14	6	dfc09178-795a-4503-964b-b21235dddfc9
2024711849152	2024711849152	2024	7	11	8	48	65s	2024	7	11	8	49	152						Angraecum mauritianum	orchidaceae	Valid	10	40								vegetating	5							crown	Adult	729	728-734, 738: right branch from 9 to 11m		65s-152/103h	14	6	dfc09178-795a-4503-964b-b21235dddfc10
2024711849152	2024711849152	2024	7	11	8	48	65s	2024	7	11	8	49	152						Angraecum mauritianum	orchidaceae	Valid	10.5	40								dry/fallen fruit	12							crown	Adult	730	728-734, 738: right branch from 9 to 11m		65s-152/103i	14	6	dfc09178-795a-4503-964b-b21235dddfc11
2024711849152	2024711849152	2024	7	11	8	48	65s	2024	7	11	8	49	152						Angraecum mauritianum	orchidaceae	Valid	10.5	40								dry/fallen fruit								crown	Adult	730	728-734, 738: right branch from 9 to 11m		65s-152/103j	14	6	dfc09178-795a-4503-964b-b21235dddfc12
2024711849152	2024711849152	2024	7	11	8	48	65s	2024	7	11	8	49	152						Angraecum pectinatum	orchidaceae	Valid	10.5	40								vegetating								crown	Adult	731	728-734, 738: right branch from 9 to 11m		65s-152/103k	14	6	dfc09178-795a-4503-964b-b21235dddfc13
2024711849152	2024711849152	2024	7	11	8	48	65s	2024	7	11	8	49	152						Angraecum mauritianum	orchidaceae	Valid	10.5	40								vegetating	5							crown	Subadult	732	728-734, 738: right branch from 9 to 11m		65s-152/103l	14	6	dfc09178-795a-4503-964b-b21235dddfc14
2024711849152	2024711849152	2024	7	11	8	48	65s	2024	7	11	8	49	152						Angraecum pectinatum	orchidaceae	Valid	10.5	40								vegetating								crown	Adult	733-735	728-734, 738: right branch from 9 to 11m		65s-152/103m	14	6	dfc09178-795a-4503-964b-b21235dddfc15
2024711849152	2024711849152	2024	7	11	8	48	65s	2024	7	11	8	49	152						Angraecum pectinatum	orchidaceae	Valid	10.5	40								vegetating								crown	Adult	733-735	728-734, 738: right branch from 9 to 11m		65s-152/103n	14	6	dfc09178-795a-4503-964b-b21235dddfc16
2024711849152	2024711849152	2024	7	11	8	48	65s	2024	7	11	8	49	152						Angraecum pectinatum	orchidaceae	Valid	10.5	40								vegetating								crown	Adult	733-735	728-734, 738: right branch from 9 to 11m		65s-152/103o	14	6	dfc09178-795a-4503-964b-b21235dddfc17
2024711849152	2024711849152	2024	7	11	8	48	65s	2024	7	11	8	49	152						Angraecum sp.	orchidaceae	Valid	10.5	40								dry/fallen fruit	2							crown	Adult	736	728-734, 738: right branch from 9 to 11m		65s-152/103p	14	6	dfc09178-795a-4503-964b-b21235dddfc18
2024711849152	2024711849152	2024	7	11	8	48	65s	2024	7	11	8	49	152						Angraecum sp.	orchidaceae	Valid	10.5	40								dry/fallen fruit	3							crown	Adult	736	728-734, 738: right branch from 9 to 11m		65s-152/103q	14	6	dfc09178-795a-4503-964b-b21235dddfc19
2024711849152	2024711849152	2024	7	11	8	48	65s	2024	7	11	8	49	152						Angraecum mauritianum	orchidaceae	Valid	11	40								vegetating								crown	Adult	738	728-734, 738: right branch from 9 to 11m		65s-152/103r	14	6	dfc09178-795a-4503-964b-b21235dddfc20
2024741126147	2024741126147	2024	7	4	11	25	65s	2024	7	4	11	26	147	1		Seed plant	MUS_508		Piper borbonense	Piperaceae	Valid	0.7	304				5.5	3	false	0	vegetating	11	0	0			0.2	1	main trunk	Juvenile/Sapling			vegetating	65s-147/1	11	37	37862b21-d9b8-4496-9cce-2fd77de6ed12
2024741126147	2024741126147	2024	7	4	11	25	65s	2024	7	4	11	26	147	1		Seed plant	MUS_508		Piper borbonense	Piperaceae	Valid	2.1	2				6	2.5	false	0	vegetating		0	0			0.2	1	main trunk	Subadult			vegetating	65s-147/2	11	45	df303f3b-a078-4858-967d-b5808148754b
2024741126147	2024741126147	2024	7	4	11	25	65s	2024	7	4	11	26	147	1		Seed plant	MUS_508		Piper borbonense	Piperaceae	Valid	1.8	40				10.5	5.2	false	0	vegetating		0	0			0.4	1	main trunk	Subadult			vegetating	65s-147/3	11	49	0cecc9cf-6183-4c94-9036-f9bdf7e07570
2024741126147	2024741126147	2024	7	4	11	25	65s	2024	7	4	11	26	147	1		Seed plant	MUS_508		Piper borbonense	Piperaceae	Valid	2.5	120						false	0	vegetating		0	0			0.2	1	main trunk	Adult			vegetating	65s-147/4	11	53	9671ffed-c1d2-4805-ba68-4a025842fbf5
2024741126147	2024741126147	2024	7	4	11	25	65s	2024	7	4	11	26	147	1		Seed plant	MUS_508		Piper borbonense	Piperaceae	Valid		132						false										main trunk			from ground along trunk		65s-147/5	11	59	51c398dd-3fdf-446c-bb7e-2ac1add691d5
2024741126147	2024741126147	2024	7	4	11	25	65s	2024	7	4	11	26	147	1		Seed plant	MUS_508		Piper borbonense	Piperaceae	Valid		132						false										main trunk			from ground along trunk		65s-147/5b	11	59	51c398dd-3fdf-446c-bb7e-2ac1add691d6
2024741126147	2024741126147	2024	7	4	11	25	65s	2024	7	4	11	26	147	1		Seed plant	MUS_508		Piper borbonense	Piperaceae	Valid		132						false										main trunk			from ground along trunk		65s-147/5c	11	59	51c398dd-3fdf-446c-bb7e-2ac1add691d7
2024741126147	2024741126147	2024	7	4	11	25	65s	2024	7	4	11	26	147	1		Seed plant	MUS_508		Piper borbonense	Piperaceae	Valid		132						false										main trunk			from ground along trunk		65s-147/5d	11	59	51c398dd-3fdf-446c-bb7e-2ac1add691d8
2024741126147	2024741126147	2024	7	4	11	25	65s	2024	7	4	11	26	147	1		Seed plant	MUS_508		Piper borbonense	Piperaceae	Valid		132						false										main trunk			from ground along trunk		65s-147/5e	11	59	51c398dd-3fdf-446c-bb7e-2ac1add691d9
2024741126147	2024741126147	2024	7	4	11	25	65s	2024	7	4	11	26	147	1		Seed plant	MUS_508		Piper borbonense	Piperaceae	Valid	1.65	140				7	2.5	false	0	vegetating	37	0	0			0.1	1	main trunk	Juvenile/Sapling			vegetating	65s-147/6	12	0	96554b3a-1802-40b9-887a-b7c6fcf86681
2024741126147	2024741126147	2024	7	4	11	25	65s	2024	7	4	11	26	147	1		Seed plant	MUS_508		Piper borbonense	Piperaceae	Valid	0.63	120				5	2	false	0	vegetating	22	0	0			0.1	1	main trunk	Juvenile/Sapling			vegetating	65s-147/7	12	3	d26a6792-6158-4af5-a73d-e61a89287b3e
2024741126147	2024741126147	2024	7	4	11	25	65s	2024	7	4	11	26	147	1		Seed plant	MUS_508		Piper borbonense	Piperaceae	Valid	0.58	170				5	2	false	0	vegetating	36	0	0			0.1	1	main trunk	Juvenile/Sapling				65s-147/8	12	5	668f82f3-5915-4bb9-b258-a1da6bc89d9d
2024741126147	2024741126147	2024	7	4	11	25	65s	2024	7	4	11	26	147	1		Seed plant	MUS_397		Angraecum pectinatum	orchidaceae	Valid	1.9	90	3.6	3.7	3.2	1.8	0.3	true	0	vegetating	8	0	0				1	main trunk	Adult			vegetating	65s-147/9	12	21	ba9b4044-99e9-41fc-901f-03bbaebae563
2024741126147	2024741126147	2024	7	4	11	25	65s	2024	7	4	11	26	147	1		Seed plant	MUS_397		Angraecum pectinatum	orchidaceae	Valid	2.1	110						false	0	vegetating	8	0	0				1	main trunk	Subadult			vegetating	65s-147/10	12	25	cf7a165b-fd49-44be-b626-911a41c55a52
2024741126147	2024741126147	2024	7	4	11	25	65s	2024	7	4	11	26	147	1		Seed plant	MUS_397		Angraecum pectinatum	orchidaceae	Valid	2.3	100						false	0	vegetating	6	0	0				1	main trunk	Subadult	103-434		vegetating	65s-147/11	12	27	e877637c-5a9c-485a-b69b-8acee5e45eb1
2024741126147	2024741126147	2024	7	4	11	25	65s	2024	7	4	11	26	147	1		Seed plant	MUS_397		Angraecum pectinatum	orchidaceae	Valid	2.4	132							0	vegetating	8	0	0				1	main trunk	Subadult	435		vegetating	65s-147/12	12	31	e25813de-163b-4d1d-be7a-706a60064db1
2024741126147	2024741126147	2024	7	4	11	25	65s	2024	7	4	11	26	147	1		Seed plant	MUS_397		Angraecum pectinatum	orchidaceae	Valid	3.45	110							0	vegetating	7	0	0				1	main trunk	Subadult	436		vegetating	65s-147/13	12	33	65f20494-59f0-4af5-9be9-a9361a0687d9
2024741126147	2024741126147	2024	7	4	11	25	65s	2024	7	4	11	26	147	1		Seed plant	MUS_397		Angraecum pectinatum	orchidaceae	Valid	2.5	84							0	vegetating	9	0	0				1	main trunk	Subadult	438		vegetating	65s-147/14	12	35	4684e5ee-6e8d-4a0b-85e7-91eb332d10dc
2024741126147	2024741126147	2024	7	4	11	25	65s	2024	7	4	11	26	147	1		Seed plant	MUS_397		Angraecum pectinatum	orchidaceae	Valid	4.4	70							0	vegetating	6	0	0				1	main trunk	Subadult	439		vegetating	65s-147/15	12	40	335b6044-391e-42a0-a302-b786b7469060
2024741126147	2024741126147	2024	7	4	11	25	65s	2024	7	4	11	26	147	1		Seed plant	MUS_397		Angraecum pectinatum	orchidaceae	Valid	4.8	20							3	unripe fruit	19	0	1				1	main trunk	Adult	441		fruiting	65s-147/16	12	45	3dab6620-c2a2-45c7-89cf-8c45e009397f
2024741126147	2024741126147	2024	7	4	11	25	65s	2024	7	4	11	26	147	1		Seed plant	MUS_397		Angraecum pectinatum	orchidaceae	Valid	4.9	20							3	unripe fruit		0	1				1	main trunk	Adult	442	15 atems	fruiting	65s-147/17	12	49	769020fa-35db-4e60-be32-84814b30dc50
2024741126147	2024741126147	2024	7	4	11	25	65s	2024	7	4	11	26	147	1		Seed plant	MUS_397		Angraecum pectinatum	orchidaceae	Valid	5	20							0	flower bud	5	0	0				1	main trunk	Adult	443	Seems to have flower bud		65s-147/18	12	54	8509dcc0-33dd-4321-a98e-4f20b30074fa
2024741126147	2024741126147	2024	7	4	11	25	65s	2024	7	4	11	26	147	1		Seed plant	MUS_397		Angraecum pectinatum	orchidaceae	Valid	5.1	20							0	vegetating	3	0	0				1	main trunk	Subadult	444		vegetating	65s-147/19	12	58	44fe0b8c-0e5b-491d-813d-4e0125c0163b
2024741126147	2024741126147	2024	7	4	11	25	65s	2024	7	4	11	26	147	1		Seed plant	MUS_397		Angraecum pectinatum	orchidaceae	Valid	5.1	20							0	vegetating	2	0	0				1	main trunk	Juvenile/Sapling	445		vegetating	65s-147/20	12	59	1b262f7e-4cc8-4f87-be31-d051a01b7beb
2024741126147	2024741126147	2024	7	4	11	25	65s	2024	7	4	11	26	147	1		Seed plant	MUS_397		Angraecum pectinatum	orchidaceae	Valid	5.2	80							0	vegetating	18	0	0				1	main trunk	Adult	446		vegetating	65s-147/21	13	3	a405e26d-418c-41d7-9ed0-6c1ac76c9a23
2024741126147	2024741126147	2024	7	4	11	25	65s	2024	7	4	11	26	147	1		Seed plant	MUS_397		Angraecum pectinatum	orchidaceae	Valid	5.5	40							1	flower bud		0	0				1	main trunk	Adult	447	5 stems	reproducing	65s-147/22	13	6	77d4277c-882a-48eb-b930-da523710db8f
2024741126147	2024741126147	2024	7	4	11	25	65s	2024	7	4	11	26	147	1		Seed plant	MUS_397		Angraecum pectinatum	orchidaceae	Valid	5.6	40							3	unripe fruit			1				1	main trunk	Adult	448	3 stems		65s-147/23	13	11	cf5a5a30-bd7a-4984-a671-467c0a14351b
2024741126147	2024741126147	2024	7	4	11	25	65s	2024	7	4	11	26	147	1		Seed plant	MUS_397		Angraecum pectinatum	orchidaceae	Valid	5.6	40							0	vegetating	27	0	0				1	main trunk	Adult	450		vegetating	65s-147/24	13	14	ab7febd6-b12c-45a3-a7a0-12f61de16697
2024741126147	2024741126147	2024	7	4	11	25	65s	2024	7	4	11	26	147	1		Seed plant	MUS_397		Angraecum pectinatum	orchidaceae	Valid	5.7	40							0	vegetating	17	0	0				1	main trunk	Adult	451		vegetating	65s-147/25	13	16	10999f71-75e0-4b36-b72d-090d9c091c78
2024741126147	2024741126147	2024	7	4	11	25	65s	2024	7	4	11	26	147	1		Seed plant	MUS_397		Angraecum pectinatum	orchidaceae	Valid	6	40							3	unripe fruit	39	0	3				1	main trunk	Adult	452		fruiting	65s-147/26	13	20	b3f186ed-e392-4107-8b93-f95b3011a170
2024741126147	2024741126147	2024	7	4	11	25	65s	2024	7	4	11	26	147	1		Seed plant	MUS_397		Angraecum pectinatum	orchidaceae	Valid	6	40							0	vegetating		0	0				1	main trunk	Adult	455		vegetating	65s-147/27	13	23	ec724281-326c-4333-9098-94690f1a9875
2024741126147	2024741126147	2024	7	4	11	25	65s	2024	7	4	11	26	147	1		Seed plant	MUS_397		Angraecum pectinatum	orchidaceae	Valid	6.5	40							3	unripe fruit	11	0	1				1	main trunk	Adult	456		fruiting	65s-147/28	13	26	6e84223b-ac8a-487b-a774-ecb6ef188ebd
[truncated: 763 more rows]
