# Supplementary material for: Harungana madagascariensis (Hypericaceae) is a key phorophyte for native epiphytes and lianas during ecological restoration: case study on an oceanic island
Source: PeerJ journal article supplement (doi:10.7717/peerj.20520), 2025-12-19
Supplement: Supplementary_material_Figure_S1.pdf [file Supplementary_material_Figure_S1.pdf]

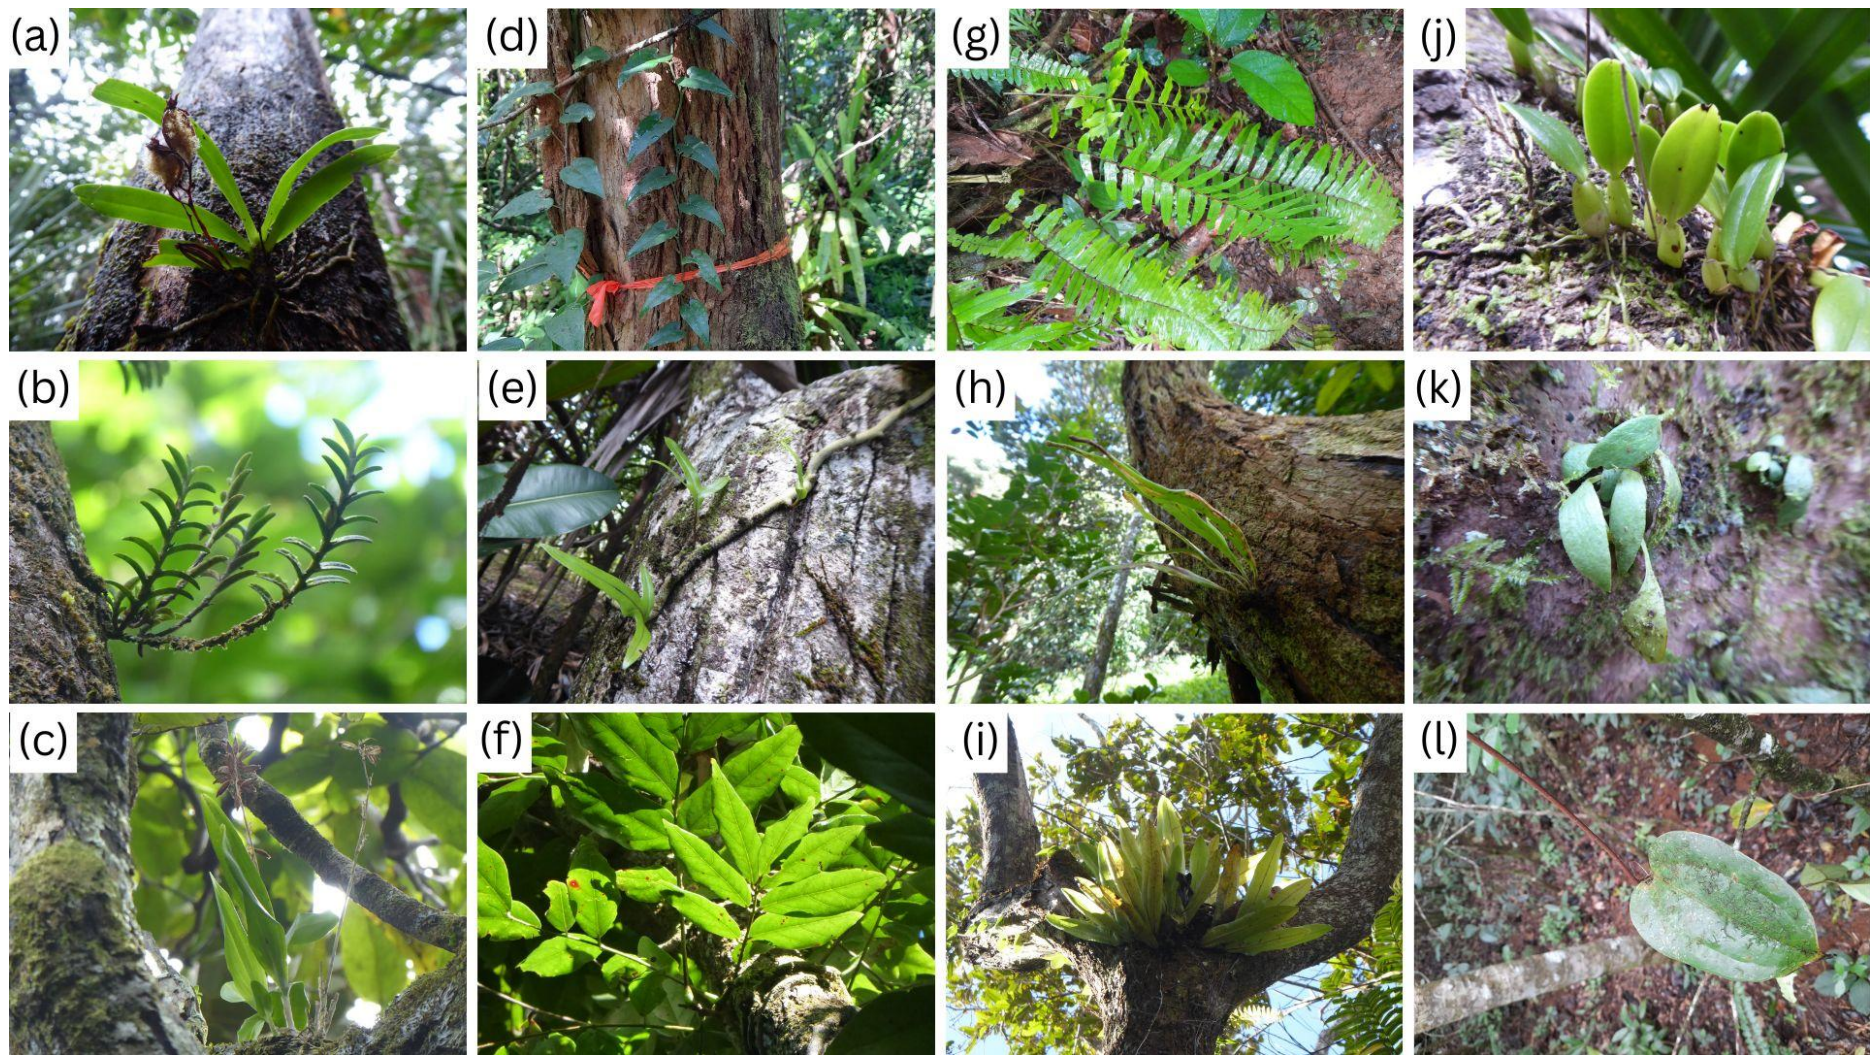

Selection of epiphytes and lianas observed in Brise Fer and Mount Camizard. (a) to (c) illustrate three of the most abundant orchid species observed, respectively *Angraecum* spp., *Angraecum pectinatum*, and *Polystachia mauritiana* s.l.. (b) to (f) illustrate three of the most abundant liana species observed, respectively *Piper borbonense*, *Microsorium scolopendria*, and *Cnestis polyphylla*. (g) to (i) illustrate three of the most abundant fern species observed, respectively *Nephrolepis biserrata*, *Lepisorus spicatus*, and *Microsorium punctatum*. (j) to (l) illustrate three of the rarest epiphyte and liana species observed, respectively *Bulbophyllum* cf. *incurvum*, *Anthrophyum immersum*, and *Smilax anceps*. Photos: François Baguette.
